# Supplementary material
Source: publisher site journal article supplement (https://www.dovepress.com/get_supplementary_file.php?f=472778.xlsx)
Supplement: Supplementary file 1 [file get_supplementary_file.php]

## Sheet: lipidomics
Table S1. Lipidomics of liquid chromatography-mass spectrometry
name	Class	MainIon	mz	rtmin	IonFormula	169	175	176	179	212	178	180	182	184	189	QC1	QC2	QC3	QC4	QC5	QC6	QC7
AEA(16:0)	AEA	M+H	300.29	4.56147	C18 H38 O2 N1	7.5768e+07	8.4143e+07	6.06081e+07	6.83282e+07	7.03851e+07	2.1187e+08	2.29146e+08	8.89217e+07	1.24513e+08	1.21557e+08	1.00619e+08	9.80286e+07	9.74341e+07	9.67887e+07	9.63642e+07	1.04742e+08	1.01655e+08
AEA(16:1)	AEA	M+H	298.274	3.20815	C18 H36 O2 N1	2.61436e+06	2.52639e+06	2.00761e+06	2.33072e+06	1.84694e+06	3.44955e+06	3.57514e+06	2.72932e+06	2.8275e+06	3.10508e+06	2.73546e+06	2.09668e+06	2.41952e+06	2.33377e+06	2.50267e+06	2.32522e+06	2.25131e+06
AEA(18:0)	AEA	M+H	328.321	6.64867	C20 H42 O2 N1	3.99144e+07	4.78407e+07	3.38831e+07	3.66449e+07	3.83915e+07	1.01399e+08	9.8038e+07	4.72144e+07	7.4537e+07	5.77598e+07	4.86563e+07	4.983e+07	4.67313e+07	4.81927e+07	4.85724e+07	4.72818e+07	4.80389e+07
AEA(18:1)	AEA	M+H	326.305	4.85829	C20 H40 O2 N1	2.62192e+07	2.44336e+07	2.18972e+07	2.61195e+07	2.14127e+07	5.74474e+07	4.75627e+07	3.21443e+07	3.95754e+07	3.558e+07	3.05767e+07	2.87719e+07	2.97213e+07	2.94836e+07	2.91485e+07	3.28389e+07	3.41359e+07
AEA(18:2)	AEA	M+H	324.29	3.62202	C20 H38 O2 N1	3.16604e+07	2.37121e+07	1.87425e+07	2.32978e+07	2.04398e+07	5.48302e+07	5.36551e+07	2.96172e+07	3.97693e+07	3.68938e+07	3.00834e+07	2.88648e+07	2.90974e+07	2.84142e+07	2.92927e+07	2.90358e+07	2.86386e+07
AEA(20:0)	AEA	M+H	356.352	8.52	C22 H46 O2 N1	1.06542e+06	1.12487e+06	561538	614878	711091	1.26568e+06	1.11849e+06	774760	1.28279e+06	907474	1.026e+06	931408	1.05719e+06	957735	1.06972e+06	736260	851770
AEA(20:3)	AEA	M+H	350.305	4.11152	C22 H40 O2 N1	2.74906e+06	1.86673e+06	1.78412e+06	2.49549e+06	1.94892e+06	4.41511e+06	3.65404e+06	1.75518e+06	3.2224e+06	3.1773e+06	2.71918e+06	2.27935e+06	2.13264e+06	1.49904e+06	2.80692e+06	2.09235e+06	2.23094e+06
AEA(20:4)	AEA	M+H	348.29	3.48826	C22 H38 O2 N1	1.22649e+07	8.32696e+06	5.20141e+06	6.51608e+06	4.8113e+06	1.25811e+07	1.37036e+07	7.96759e+06	6.85365e+06	9.45675e+06	8.30727e+06	8215281	8.34484e+06	7.36171e+06	7.98949e+06	7.32865e+06	8.0805e+06
AEA(22:1)	AEA	M+H	382.368	8.57649	C24 H48 O2 N1	1.37612e+06	2.06348e+06	1.69131e+06	1.32364e+06	1.15701e+06	2.24886e+06	3.07044e+06	1.48295e+06	2.38201e+06	1.9574e+06	1.92615e+06	1.83366e+06	1.69845e+06	1.89673e+06	1.66374e+06	1.81893e+06	1.90714e+06
AEA(24:1)	AEA	M+H	410.399	10.2009	C26 H52 O2 N1	2.59165e+06	3.14008e+06	2.22898e+06	2.27227e+06	1.83766e+06	5.03235e+06	4.78123e+06	2.89732e+06	4.20386e+06	3.52121e+06	2.96159e+06	3.09768e+06	2.81835e+06	2.75334e+06	3.0116e+06	2.89083e+06	2.7533e+06
AcCa(11:2)	AcCa	M+H	326.233	1.10548	C18 H32 O4 N1	532269	806881	409729	433160	193496	314270	215615	1.79756e+06	556118	1.00879e+06	1.19488e+06	1.57398e+06	1.18851e+06	1.18596e+06	1.43221e+06	1.17677e+06	1.33053e+06
AcCa(14:0)	AcCa	M+H	372.311	2.08332	C21 H42 O4 N1	4.08552e+06	3.13926e+06	3.25148e+06	5.46282e+06	4.82476e+06	9.51767e+06	1.03364e+07	5.98301e+06	1.07606e+07	5.27592e+06	5.46215e+06	5.12659e+06	4.3278e+06	6.31295e+06	6.32767e+06	5.55804e+06	5.5789e+06
AcCa(14:1)	AcCa	M+H	370.295	1.67375	C21 H40 O4 N1	368781	335636	105641	656180	1.16037e+06	3.51902e+06	788225	1.1232e+06	2.77056e+06	1.03067e+06	992997	627268	583263	1.10146e+06	1.57342e+06	844891	873026
AcCa(14:2)	AcCa	M+H	368.28	1.31579	C21 H38 O4 N1	5.058e+06	4.17946e+06	3.025e+06	5.1571e+06	3.95123e+06	5.73878e+06	1.16734e+07	9.5267e+06	2.12328e+07	2.79444e+06	4.71021e+06	6.86269e+06	5.28015e+06	5.13336e+06	5.79388e+06	4.8329e+06	5.85779e+06
AcCa(16:0)	AcCa	M+H	400.342	3.13483	C23 H46 O4 N1	7.30809e+07	4.48274e+07	3.62244e+07	6.33249e+07	4.89879e+07	1.1519e+08	1.13905e+08	9.10323e+07	9.62629e+07	5.7053e+07	6.8745e+07	7.00556e+07	6.6301e+07	6.55148e+07	6.58623e+07	6.81791e+07	6.91826e+07
AcCa(16:1)	AcCa	M+H	398.326	2.24042	C23 H44 O4 N1	1.78472e+07	1.08961e+07	9.51188e+06	1.3475e+07	7.95947e+06	9.9391e+06	1.23438e+07	1.66055e+07	1.47376e+07	9.9319e+06	1.20557e+07	1.23753e+07	1.24114e+07	1.19923e+07	1.11864e+07	1.19722e+07	1.11398e+07
AcCa(17:0)	AcCa	M+H	414.358	3.85998	C24 H48 O4 N1	1.11536e+06	671837	592273	1.28386e+06	831088	1.76711e+06	1.81328e+06	1.36153e+06	1.46575e+06	826997	1.02682e+06	1.46028e+06	1.19532e+06	1.29494e+06	1.09699e+06	1.10812e+06	1.06967e+06
AcCa(18:0)	AcCa	M+H	428.373	4.71551	C25 H50 O4 N1	4.41901e+07	3.46327e+07	3.31428e+07	5.73311e+07	3.35023e+07	7.92254e+07	9.24875e+07	6.00697e+07	5.64094e+07	4.12125e+07	4.91741e+07	4.84879e+07	4.46405e+07	4.26392e+07	4.45275e+07	4.32237e+07	4.50809e+07
AcCa(18:1)	AcCa	M+H	426.358	3.38056	C25 H48 O4 N1	7.31678e+07	3.72281e+07	2.65896e+07	3.97782e+07	3.3058e+07	3.95455e+07	3.52695e+07	5.38901e+07	4.24723e+07	2.80047e+07	3.85537e+07	3.91292e+07	3.97629e+07	3.79408e+07	3.92486e+07	4.00251e+07	4.03788e+07
AcCa(18:2)	AcCa	M+H	424.342	2.50143	C25 H46 O4 N1	1.12924e+08	6.32475e+07	4.27899e+07	5.77682e+07	5.4571e+07	8.10092e+07	1.02415e+08	8.63663e+07	8.89694e+07	6.39913e+07	7.57532e+07	7.12099e+07	7.18996e+07	7.90964e+07	7.30501e+07	7.4019e+07	7.43154e+07
AcCa(19:0)	AcCa	M+H	442.389	5.19253	C26 H52 O4 N1	5.69043e+06	2.60606e+06	1.53402e+06	6.66261e+06	3.22545e+06	8.9692e+06	2.34599e+07	6.84618e+06	1.54395e+07	6.09821e+06	6.88263e+06	6.76568e+06	6.44579e+06	6.3362e+06	6.70474e+06	6.88719e+06	6.65574e+06
AcCa(20:0)	AcCa	M+H	456.405	6.71828	C27 H54 O4 N1	5.99488e+06	2.84342e+06	2.80899e+06	6.18923e+06	4.04674e+06	7.54251e+06	9.06769e+06	5.71679e+06	7.71568e+06	3.73671e+06	4.59238e+06	4.75048e+06	4.53413e+06	4.80281e+06	4.45603e+06	4.88019e+06	4.42498e+06
AcCa(20:1)	AcCa	M+H	454.389	4.88364	C27 H52 O4 N1	2.70888e+06	1.93956e+06	1.99442e+06	4.215e+06	3.104e+06	4.86878e+06	5.10748e+06	4.08733e+06	4.0465e+06	2.30027e+06	3.02923e+06	3.25499e+06	3.08373e+06	3.06172e+06	3.03854e+06	3.0635e+06	2.87802e+06
AcCa(20:4)	AcCa	M+H	448.342	2.39068	C27 H46 O4 N1	6.03929e+07	5.21479e+07	4.17337e+07	6.6686e+07	3.93798e+07	5.65172e+07	7.4239e+07	6.26254e+07	6.14784e+07	5.10925e+07	5.40305e+07	5.51141e+07	5.21533e+07	5.73126e+07	5.67205e+07	5.48612e+07	5.84481e+07
AcCa(20:5)	AcCa	M+H	446.326	1.91107	C27 H44 O4 N1	1.00491e+06	1.16494e+06	816835	1.4502e+06	1.27679e+06	2.73333e+06	2.27639e+06	1.93535e+06	2.98199e+06	1.27653e+06	1.58297e+06	1.44779e+06	1.40874e+06	1.61265e+06	1.53814e+06	1.69563e+06	1.83929e+06
AcCa(21:0)	AcCa	M+H	470.42	7.24071	C28 H56 O4 N1	4.93512e+06	2.12458e+06	1.31765e+06	4.21013e+06	3.13893e+06	1.33462e+07	3.06487e+07	5.3367e+06	1.20373e+07	9.51772e+06	6.93984e+06	7.92618e+06	6.81815e+06	6.67091e+06	6.30167e+06	6.65518e+06	6.8017e+06
AcCa(21:1)	AcCa	M+H	468.405	5.35737	C28 H54 O4 N1	1.41445e+07	7.19806e+06	4.64656e+06	1.62656e+07	9.32901e+06	2.10219e+07	3.87156e+07	1.69862e+07	2.49728e+07	1.54039e+07	1.3742e+07	1.41816e+07	1.35713e+07	1.43997e+07	1.41911e+07	1.47589e+07	1.45576e+07
AcCa(22:0)	AcCa	M+H	484.436	8.40266	C29 H58 O4 N1	1.51394e+07	7.76051e+06	5.29218e+06	1.18526e+07	4.56541e+06	5.95996e+06	8.52044e+06	8.1934e+06	5.98672e+06	6.03678e+06	7.75987e+06	7.49982e+06	7.61593e+06	6.82129e+06	7.1824e+06	7.12711e+06	7.26244e+06
AcCa(22:1)	AcCa	M+H	482.42	6.79598	C29 H56 O4 N1	6.80485e+06	5.04982e+06	3.77928e+06	1.04215e+07	5.20562e+06	6.19957e+06	8.52158e+06	6.50076e+06	9.87375e+06	3.49969e+06	5.28664e+06	5.78507e+06	5.86747e+06	5.26665e+06	5.43191e+06	5.15515e+06	5.78453e+06
AcCa(22:6)	AcCa	M+H	472.342	2.22469	C29 H46 O4 N1	9.10427e+06	8.73797e+06	6.36483e+06	8.58061e+06	6.18062e+06	8.67803e+06	1.4708e+07	9.16046e+06	1.09605e+07	8.83498e+06	9.80528e+06	8.00914e+06	7.74511e+06	8.15436e+06	7.97112e+06	7.39305e+06	7.3663e+06
AcCa(23:0)	AcCa	M+H	498.452	9.177	C30 H60 O4 N1	1.25775e+06	681491	648495	942579	240640	826847	1.13031e+06	1.0651e+06	1.08814e+06	733656	690235	681398	725268	717712	827241	873572	684253
AcCa(23:1)	AcCa	M+H	496.436	7.31065	C30 H58 O4 N1	1.03111e+06	347459	154248	873323	913201	3.23578e+06	5.76987e+06	924295	1.25157e+06	2.19459e+06	1.3461e+06	1.25091e+06	1.33885e+06	1.21341e+06	1.26243e+06	1.19472e+06	1.07773e+06
AcCa(24:0)	AcCa	M+H	512.467	9.97566	C31 H62 O4 N1	1.52119e+07	8.3673e+06	7.14585e+06	1.18057e+07	4.5233e+06	6.41353e+06	9.89863e+06	9.89285e+06	9.38178e+06	6.1468e+06	9.18269e+06	8.74445e+06	8.74389e+06	8.55085e+06	9.04021e+06	8.60082e+06	8.91138e+06
AcCa(24:1)	AcCa	M+H	510.452	8.42988	C31 H60 O4 N1	1.12811e+07	8.30497e+06	6.5555e+06	1.09505e+07	3.34601e+06	4.01698e+06	6.62629e+06	6.67298e+06	4.2298e+06	3.98345e+06	6.5407e+06	6.07811e+06	6.20138e+06	6.13215e+06	6.01653e+06	6.15895e+06	5.98639e+06
AcHexChE(37:0)	AcHexChE	M+H	1081.97	22.754	C70 H129 O7	1.00047e+07	1.48026e+07	1.06541e+07	1.00325e+07	6.555e+06	2.09653e+07	1.97275e+07	8.86794e+06	1.85113e+07	1.58506e+07	1.34671e+07	1.38788e+07	1.31315e+07	1.38449e+07	1.20371e+07	1.2869e+07	1.3159e+07
AcHexChE(37:1)	AcHexChE	M+NH4	1096.98	22.343	C70 H130 O7 N1	1.16466e+07	1.50453e+07	1.313e+07	6.49688e+06	6.98137e+06	1.33643e+07	2.09918e+07	1.59501e+07	1.99419e+07	1.44507e+07	1.52814e+07	1.56037e+07	1.50855e+07	1.41748e+07	1.43898e+07	1.47108e+07	1.42427e+07
AcHexChE(37:2)	AcHexChE	M+NH4	1094.97	22.3462	C70 H128 O7 N1	5.70893e+07	7.75864e+07	5.63116e+07	5.06097e+07	3.5323e+07	8.04907e+07	9.21714e+07	6.81346e+07	7.17253e+07	7.32733e+07	6.35126e+07	5.44749e+07	5.72112e+07	5.59759e+07	6.14154e+07	5.96133e+07	5.34106e+07
AcHexSiE(16:0)	AcHexSiE	M+NH4	832.702	18.813	C51 H94 O7 N1	8.12234e+06	9.44142e+06	9.28338e+06	9.67243e+06	6.97612e+06	2.49777e+07	4.9059e+07	2.86089e+07	3.53229e+07	2.83221e+07	1.96984e+07	1.85273e+07	1.79836e+07	1.879e+07	1.77785e+07	2.37621e+07	1.80149e+07
AcHexSiE(33:0)	AcHexSiE	M+NH4	1070.97	22.802	C68 H128 O7 N1	1.64777e+07	2.16956e+07	1.5989e+07	1.54064e+07	1.21109e+07	2.67764e+07	3.29075e+07	2.10946e+07	2.37777e+07	2.33707e+07	2.08424e+07	2.07597e+07	1.98549e+07	1.99318e+07	1.85484e+07	1.76492e+07	1.97837e+07
AcHexSiE(33:1)	AcHexSiE	M+NH4	1068.95	22.36	C68 H126 O7 N1	1.87556e+08	2.95393e+08	1.9062e+08	1.74767e+08	1.40861e+08	3.3091e+08	4.02771e+08	2.68669e+08	2.87254e+08	2.52129e+08	2.3826e+08	2.42515e+08	2.39659e+08	2.3509e+08	2.26436e+08	2.30681e+08	2.3366e+08
AcHexStE(33:0)	AcHexStE	M+NH4	1068.95	22.644	C68 H126 O7 N1	1.37208e+08	2.07292e+08	1.40996e+08	1.34654e+08	1.07995e+08	2.68701e+08	2.9858e+08	1.98951e+08	2.25888e+08	2.09581e+08	1.88839e+08	1.88791e+08	1.74684e+08	1.68696e+08	1.7044e+08	1.62788e+08	1.6236e+08
AcHexStE(38:0)	AcHexStE	M+H	1122	22.785	C73 H133 O7	4.34148e+06	6.63822e+06	6.0139e+06	4.89976e+06	2.60491e+06	1.13249e+07	7.56811e+06	6.51411e+06	8.97543e+06	7.10545e+06	6.62565e+06	5.14311e+06	7.49457e+06	8.53057e+06	8.38731e+06	6.74629e+06	6.26162e+06
AcHexStE(38:1)	AcHexStE	M+H	1119.99	22.6052	C73 H131 O7	2.2777e+06	4.95204e+06	3.26322e+06	3.31327e+06	3.26955e+06	8.31198e+06	6.10304e+06	5.26375e+06	7.70285e+06	6.73067e+06	5.32992e+06	4.51757e+06	4.15486e+06	5.71112e+06	5.63895e+06	5.42035e+06	4.77212e+06
AcHexZyE(36:0)	AcHexZyE	M+H	1065.94	22.5475	C69 H125 O7	3.15028e+07	5.13695e+07	3.68897e+07	3.14613e+07	2.86172e+07	6.99871e+07	7.07746e+07	5.20404e+07	5.66607e+07	5.2549e+07	4.67464e+07	4.40108e+07	4.51237e+07	4.59928e+07	4.23835e+07	4.39342e+07	4.32292e+07
AcHexZyE(37:0)	AcHexZyE	M+H	1079.96	22.592	C70 H127 O7	9.21637e+06	1.41866e+07	9.65722e+06	9.99555e+06	6.96218e+06	2.15717e+07	2.08648e+07	1.35876e+07	1.59752e+07	1.46236e+07	1.27692e+07	1.24083e+07	1.26112e+07	1.23108e+07	1.16653e+07	1.27114e+07	1.20717e+07
AcHexZyE(38:0)	AcHexZyE	M+H	1093.97	22.776	C71 H129 O7	6.15339e+07	8.95554e+07	6.71313e+07	6.63683e+07	5.24113e+07	1.42518e+08	1.26898e+08	9.74488e+07	1.01315e+08	1.15368e+08	8.86753e+07	9.01472e+07	9.11105e+07	8.95054e+07	8.40139e+07	8.40034e+07	8.99954e+07
AcHexZyE(38:1)	AcHexZyE	M+H	1091.96	22.3824	C71 H127 O7	1.63666e+07	2.51416e+07	1.60009e+07	1.49654e+07	1.14546e+07	4.33579e+07	3.84812e+07	2.26405e+07	3.21973e+07	2.83458e+07	2.45233e+07	2.30034e+07	2.3349e+07	2.1671e+07	2.23564e+07	2.26337e+07	2.32558e+07
BiotinylPE(29:0)	BiotinylPE	M+H	876.553	11.5104	C44 H83 O10 N3 S1 P1	1.57132e+08	1.51727e+08	1.30958e+08	9.78342e+07	1.2825e+08	1.23929e+08	1.07218e+08	1.53932e+08	1.20185e+08	1.47488e+08	2.19139e+08	1.98388e+08	1.98138e+08	2.00228e+08	1.9216e+08	2.02224e+08	2.13498e+08
BiotinylPE(15:0_15:0)	BiotinylPE	M+Na	912.551	11.5369	C45 H84 O10 N3 S1 P1 Na1	2.87197e+06	1.27052e+06	1.17866e+06	4.04709e+06	3.64425e+06	1.97178e+06	1.66418e+06	494318	2.88739e+06	2.97328e+06	1.95411e+06	2.33666e+06	3.10945e+06	2.25959e+06	2.22404e+06	2.57115e+06	3.26989e+06
BiotinylPE(31:0)	BiotinylPE	M+Na	926.566	12.3223	C46 H86 O10 N3 S1 P1 Na1	4.53705e+08	3.72299e+08	3.50247e+08	3.75575e+08	5.75512e+08	7.25827e+08	7.38997e+08	4.53809e+08	5.98901e+08	7.90836e+08	5.11349e+08	5.28552e+08	5.44593e+08	5.71687e+08	5.55523e+08	5.53946e+08	5.58805e+08
BiotinylPE(31:1)	BiotinylPE	M+Na	924.551	10.8952	C46 H84 O10 N3 S1 P1 Na1	1.71434e+07	1.91972e+07	1.84514e+07	2.04996e+07	2.3377e+07	4.63409e+07	3.5898e+07	2.73634e+07	4.74117e+07	4.32923e+07	2.97497e+07	2.98456e+07	2.94034e+07	3.09247e+07	2.89951e+07	2.78025e+07	3.31754e+07
BiotinylPE(31:2)	BiotinylPE	M+H	900.553	10.8312	C46 H83 O10 N3 S1 P1	4.54155e+06	5.37704e+06	1.67559e+06	2.13306e+06	1.84134e+06	5.18516e+06	4.304e+06	2.43499e+06	4.09694e+06	3.40666e+06	3.00899e+06	3.09476e+06	3.90265e+06	2.69432e+06	3.27881e+06	2.83989e+06	4.52011e+06
BiotinylPE(32:0)	BiotinylPE	M+H	918.6	13.586	C47 H89 O10 N3 S1 P1	2.93346e+06	5.49887e+06	3.14079e+06	1.73616e+06	3.59406e+06	0	817602	2.159e+06	620977	3.04427e+06	3.90717e+06	3.164e+06	6.14123e+06	4.35611e+06	4.48156e+06	5.27458e+06	4.21053e+06
BiotinylPE(33:0)	BiotinylPE	M+Na	954.598	13.7034	C48 H90 O10 N3 S1 P1 Na1	2.39284e+08	2.02078e+08	1.85369e+08	1.9616e+08	3.44678e+08	4.55987e+08	4.36953e+08	2.48944e+08	3.3555e+08	4.41279e+08	3.20142e+08	3.22164e+08	3.15767e+08	3.20055e+08	3.05618e+08	3.17587e+08	3.20663e+08
BiotinylPE(33:1)	BiotinylPE	M+Na	952.582	12.3991	C48 H88 O10 N3 S1 P1 Na1	1.75398e+08	1.8563e+08	1.59086e+08	1.62179e+08	2.22588e+08	3.71641e+08	3.28875e+08	2.30862e+08	3.03862e+08	3.37085e+08	2.52643e+08	2.47565e+08	2.50112e+08	2.44603e+08	2.42167e+08	2.44747e+08	2.36541e+08
BiotinylPE(33:2)	BiotinylPE	M+H	928.584	12.8235	C48 H87 O10 N3 S1 P1	1.78708e+08	1.80835e+08	1.73298e+08	1.84375e+08	2.42249e+08	2.90002e+08	2.17589e+08	2.21163e+08	2.41194e+08	3.18786e+08	2.34777e+08	2.2461e+08	2.15169e+08	2.20758e+08	2.37074e+08	2.23923e+08	2.21712e+08
BiotinylPE(33:3)	BiotinylPE	M+H	926.569	12.308	C48 H85 O10 N3 S1 P1	4.53768e+08	3.62351e+08	3.50119e+08	3.75462e+08	5.75593e+08	7.25807e+08	7.38844e+08	4.53935e+08	5.97867e+08	7.90833e+08	4.97137e+08	5.41207e+08	5.44598e+08	5.71544e+08	5.55628e+08	5.5399e+08	5.58747e+08
BiotinylPE(34:1)	BiotinylPE	M+H	944.616	14.746	C49 H91 O10 N3 S1 P1	6.215e+06	6.18641e+06	5.51127e+06	5.47345e+06	9.75933e+06	4.85858e+06	8.2867e+06	7.81181e+06	7.40023e+06	1.10217e+07	8.92691e+06	1.09116e+07	9.39065e+06	7.14683e+06	9.62875e+06	7.92707e+06	8.5247e+06
BiotinylPE(35:0)	BiotinylPE	M+Na	982.629	14.942	C50 H94 O10 N3 S1 P1 Na1	6.89897e+06	8.43562e+06	5.92615e+06	6.30094e+06	6.98259e+06	7.71645e+06	9.92633e+06	7.86169e+06	1.76832e+07	8.18021e+06	8.17677e+06	9.33828e+06	8.46489e+06	5.89785e+06	8.9478e+06	8.14901e+06	9.14546e+06
BiotinylPE(35:2)	BiotinylPE	M+Na	978.598	12.523	C50 H90 O10 N3 S1 P1 Na1	1.97943e+06	2.84996e+06	2.34533e+06	1.52212e+06	3.27946e+06	874816	599398	2.84755e+06	862545	3.25402e+06	3.17603e+06	2.61875e+06	1.65644e+06	2.93167e+06	2.99739e+06	2.43707e+06	2.92409e+06
BisMeLPA(16:2e)	BisMeLPA	M+H	421.271	3.44	C21 H42 O6 N0 P1	0	0	0	0	1.85363e+06	0	0	0	1.11041e+07	0	387980	491085	418511	335585	0	347520	0
BisMeLPA(18:0)	BisMeLPA	M+H	467.313	5.181	C23 H48 O7 N0 P1	0	0	0	0	771697	0	0	0	3.91944e+06	0	0	82397.3	118905	90047.4	116638	67342.9	0
BisMeLPA(18:2e)	BisMeLPA	M+H	449.303	5.185	C23 H46 O6 N0 P1	0	0	0.069	0.006	1.66101e+06	0	0	0	6.51861e+06	0.214	230414	177556	234007	246567	166525	227535	248888
BisMePA(4:0_10:2)	BisMePA	M+Na	443.181	6.65295	C19 H33 O8 N0 P1 Na1	745933	351267	32801.5	293779	672042	610981	936119	9.55173e+06	867920	1.03612e+06	613482	154781	535056	719917	128886	246530	220620
BisMePA(4:0_11:4)	BisMePA	M+Na	453.165	1.391	C20 H31 O8 N0 P1 Na1	1.11493e+07	1.10524e+07	7.95022e+06	9.02354e+06	8.243e+06	1.20493e+07	1.87278e+07	8.83077e+06	1.48876e+07	1.34498e+07	2.08634e+07	2.15912e+07	1.97953e+07	2.09133e+07	2.00298e+07	2.04118e+07	2.09525e+07
BisMePA(10:0e_18:0)	BisMePA	M+Na	629.452	13.9577	C33 H67 O7 N0 P1 Na1	328426	0	398702	551042	3.49029e+06	5.82663e+06	0	605466	2.39313e+06	881976	517061	1.53668e+06	970284	1.51137e+06	1.12556e+06	442880	0
BisMePA(14:0e_16:0)	BisMePA	M+Na	657.483	15.3371	C35 H71 O7 N0 P1 Na1	4.17122e+07	3.5408e+07	4.41936e+07	4.11784e+07	8.04369e+07	7.94328e+07	5.47009e+07	4.13891e+07	6.41627e+07	7.08539e+07	5.81846e+07	6.00953e+07	5.93667e+07	5.98427e+07	5.85219e+07	6.17898e+07	5.83802e+07
BisMePA(16:0_16:0)	BisMePA	M+NH4	694.538	13.934	C37 H77 O8 N1 P1	0	0	0	0	1.18183e+06	0	0	0	2.44417e+07	0	0	0	361369	0	148072	0	376414
BisMePA(14:0e_18:2)	BisMePA	M+Na	681.483	13.9232	C37 H71 O7 N0 P1 Na1	6.33858e+08	6.7317e+08	6.36807e+08	6.88806e+08	5.81685e+08	8.57679e+08	1.15282e+09	7.41652e+08	8.21216e+08	6.75881e+08	7.47416e+08	7.56956e+08	7.05118e+08	7.71081e+08	7.42006e+08	7.4561e+08	7.88792e+08
BisMePA(18:0_16:0)	BisMePA	M+Na	727.525	17.039	C39 H77 O8 N0 P1 Na1	613176	2.39007e+06	1.99111e+07	1.44365e+07	3.14779e+07	5.21621e+07	5.59332e+07	4.21946e+07	4.49841e+07	3.523e+07	3.63321e+07	4.06566e+07	3.93624e+07	3.8845e+07	3.7086e+07	3.77734e+07	2.477e+07
BisMePA(16:0_18:1)	BisMePA	M+Na	725.509	16.07	C39 H75 O8 N0 P1 Na1	0.687	2.10803e+06	2.33127e+07	1.85788e+07	1.26733e+07	0.664	413895	0.337	2.76589e+06	2.476	4.43488e+06	4.73098e+06	5.19558e+06	4.64931e+06	4.60317e+06	4.72504e+06	4.98385e+06
BisMePA(16:0_18:2)	BisMePA	M+NH4	718.538	12.8782	C39 H77 O8 N1 P1	0	5.91025e+06	3.936e+06	1.05054e+06	5.73634e+07	0	0	0	2.61719e+08	509763	2.59404e+07	2.43171e+07	2.60504e+07	2.46516e+07	2.39431e+07	2.60449e+07	1.95605e+07
BisMePA(34:6e)	BisMePA	M+Na	701.452	4.72285	C39 H67 O7 N0 P1 Na1	1.71582e+06	1.42777e+06	1.05533e+06	1.54672e+06	2.42592e+06	4.12298e+06	4.54654e+06	2.57169e+06	2.51807e+06	2.87655e+06	2.76436e+06	2.59647e+06	2.16345e+06	2.3166e+06	2.27165e+06	2.31117e+06	2.61166e+06
BisMePA(27:0_15:0)	BisMePA	M+Na	839.65	19.722	C47 H93 O8 N0 P1 Na1	0	659566	9.63655e+06	6.05118e+06	3.54575e+06	0	0	0	1.56155e+06	865247	2.08938e+06	0	2.01212e+06	1.04531e+06	952188	805091	1.29708e+06
BisMePA(42:11)	BisMePA	M+NH4	812.522	11.1827	C47 H75 O8 N1 P1	1.4001e+08	1.86997e+08	1.48351e+08	1.23261e+08	1.55279e+08	3.5729e+08	3.00409e+08	2.24e+08	2.19716e+08	2.10193e+08	2.05524e+08	2.01543e+08	1.85988e+08	2.04541e+08	1.78912e+08	1.94473e+08	1.98068e+08
BisMePA(28:0_16:0)	BisMePA	M+Na	867.681	20.1805	C49 H97 O8 N0 P1 Na1	7.39849e+06	9.23023e+06	1.21865e+07	1.03855e+07	8.61797e+06	5.07566e+06	2.73323e+06	6.18034e+06	3.94393e+06	1.00172e+07	7.33172e+06	9.01747e+06	9.15027e+06	1.16045e+07	5.62252e+06	8.1641e+06	7.04264e+06
BisMePA(28:1_16:0)	BisMePA	M+Na	865.666	19.7538	C49 H95 O8 N0 P1 Na1	8.09919e+06	1.04505e+07	2.30356e+07	1.81748e+07	1.09231e+07	1.72763e+06	3.74556e+06	3.63378e+06	6.08054e+06	7.27002e+06	1.28388e+07	7.25484e+06	4.39618e+06	5.18077e+06	9.99801e+06	1.15086e+07	8.1891e+06
BisMePA(26:0_18:2)	BisMePA	M+Na	863.65	19.347	C49 H93 O8 N0 P1 Na1	1.02946e+06	2.84944e+06	6.41579e+06	7.13634e+06	5.51194e+06	2.7649e+06	7.52039e+06	366745	4.59395e+06	4.61386e+06	4.93235e+06	5.71992e+06	3.46087e+06	5.77685e+06	6.26881e+06	4.38974e+06	3.96342e+06
BisMePA(30:0_16:0)	BisMePA	M+Na	895.713	20.6156	C51 H101 O8 N0 P1 Na1	5.21855e+07	4.81591e+07	1.13632e+07	1.72346e+07	2.46412e+07	6.12799e+06	2.67801e+07	4.10864e+07	1.85181e+07	2.19728e+07	3.15449e+07	3.17428e+07	2.66225e+07	2.61338e+07	9.79584e+06	3.92581e+07	1.09852e+07
BisMePA(28:0_18:1)	BisMePA	M+Na	893.697	20.2348	C51 H99 O8 N0 P1 Na1	5.76449e+07	4.94753e+07	3.95487e+07	4.04682e+07	4.15091e+07	2.22677e+07	2.1759e+07	4.39611e+07	1.70585e+07	2.50335e+07	2.97914e+07	3.28646e+07	3.41301e+07	3.42274e+07	2.72794e+07	1.27313e+07	2.5002e+07
BisMePA(30:1_16:1)	BisMePA	M+Na	891.681	19.15	C51 H97 O8 N0 P1 Na1	5.84609e+06	5.06905e+06	3.07002e+06	3.43783e+06	2.06729e+06	1.52044e+07	2.61873e+07	3.72301e+06	2.01291e+07	7.5115e+06	5.48667e+06	6.10423e+06	6.35713e+06	7.92024e+06	9.94166e+06	6.29758e+06	8.03111e+06
BisMePA(28:1_18:1)	BisMePA	M+Na	891.681	19.8046	C51 H97 O8 N0 P1 Na1	2.42467e+07	2.73538e+07	2.73718e+07	2.92199e+07	3.04858e+07	1.58429e+07	8.68999e+06	1.61031e+07	7.91612e+06	2.088e+07	1.98757e+07	2.27825e+07	2.0559e+07	2.05385e+07	1.97668e+07	2.28182e+07	2.28983e+07
BisMePA(28:0_18:3)	BisMePA	M+Na	889.666	19.3565	C51 H95 O8 N0 P1 Na1	5.63086e+06	7.0302e+06	1.50425e+07	1.03898e+07	1.21126e+07	1.19609e+07	1.3527e+07	7.80015e+06	1.30024e+07	9.23803e+06	1.32171e+07	1.05009e+07	1.26479e+07	3.78768e+07	1.22283e+07	1.76661e+07	1.4001e+07
BisMePA(28:1_18:3)	BisMePA	M+Na	887.65	18.992	C51 H93 O8 N0 P1 Na1	4.47263e+06	4.60154e+06	3.00764e+06	3.36586e+06	9.4453e+06	2.65568e+07	2.34578e+07	5.24078e+06	1.52116e+07	1.20944e+07	1.3045e+07	1.14989e+07	1.18008e+07	1.29987e+07	1.24268e+07	1.14634e+07	1.09582e+07
BisMePA(30:0_18:0)	BisMePA	M+Na	923.744	20.9734	C53 H105 O8 N0 P1 Na1	4.83761e+06	4.51985e+06	9.3102e+06	1.10283e+07	7.54428e+06	1.50105e+06	2.00395e+06	8.63746e+06	1.5256e+06	0	5.40093e+06	5.30426e+06	3.5249e+06	4.48e+06	4.15626e+06	2.98153e+06	6.14276e+06
BisMePA(30:0_18:1)	BisMePA	M+Na	921.728	20.6677	C53 H103 O8 N0 P1 Na1	1.24078e+07	1.92704e+07	1.91665e+07	1.88592e+07	1.68815e+07	4.53003e+06	2.72989e+06	1.1357e+07	2.32081e+06	7.70932e+06	7.38343e+06	1.03543e+07	7.47081e+06	7.71877e+06	9.58747e+06	1.07638e+07	1.25998e+07
BisMePA(30:1_18:1)	BisMePA	M+Na	919.713	20.4246	C53 H101 O8 N0 P1 Na1	4.05436e+07	3.76121e+07	3.6384e+07	3.66569e+07	3.31842e+07	1.81132e+07	0	3.5597e+07	1.56967e+07	2.25963e+07	2.97579e+07	2.47325e+07	199514	2.46427e+07	0	3.29587e+07	2.58333e+07
BisMePA(30:1_18:2)	BisMePA	M+Na	917.697	19.8208	C53 H99 O8 N0 P1 Na1	2.22435e+07	2.35386e+07	3.76866e+07	3.16655e+07	3.71385e+07	9.83103e+06	1.19414e+07	1.68362e+07	1.22565e+07	8.71648e+06	1.37885e+07	1.79501e+07	1.69177e+07	2.02191e+07	1.81167e+07	1.4949e+07	2.47871e+07
BisMePA(30:1_18:3)	BisMePA	M+Na	915.681	19.4223	C53 H97 O8 N0 P1 Na1	2.70605e+07	2.0819e+07	3.38153e+07	3.34714e+07	3.77209e+07	4.77082e+07	3.90972e+07	2.20208e+07	4.21994e+07	3.44016e+07	4.70283e+07	4.51022e+07	3.29444e+07	4.50967e+07	3.11533e+07	2.6237e+07	2.74434e+07
BisMePA(30:1_18:4)	BisMePA	M+Na	913.666	18.9939	C53 H95 O8 N0 P1 Na1	1.52615e+07	1.95699e+07	1.17448e+07	2.37669e+07	3.35546e+07	5.7089e+07	5.38284e+07	6.35256e+06	4.36529e+07	5.00717e+07	3.99349e+07	3.7208e+07	4.87878e+06	2.29221e+07	3.89627e+07	3.75791e+07	6.55491e+06
BisMePA(34:0_16:0)	BisMePA	M+Na	951.775	21.3308	C55 H109 O8 N0 P1 Na1	1.71537e+07	1.61785e+07	7.02518e+06	8.65143e+06	1.49528e+07	8.08238e+06	8.84821e+06	9.25605e+06	1.16292e+07	9.92905e+06	1.21769e+07	8.85087e+06	9.1054e+06	1.62078e+07	1.04057e+07	9.3152e+06	8.99467e+06
BisMePA(32:0_18:1)	BisMePA	M+Na	949.76	21.111	C55 H107 O8 N0 P1 Na1	9.24411e+06	8.17297e+06	2.21266e+06	3.18127e+06	6.09249e+06	5.07197e+06	4.47817e+06	6.55107e+06	4.47265e+06	3.8855e+06	5.99899e+06	5.1459e+06	5.0166e+06	5.7319e+06	5.07538e+06	7.0311e+06	5.46339e+06
BisMePA(32:1_18:1)	BisMePA	M+Na	947.744	20.902	C55 H105 O8 N0 P1 Na1	1.58743e+07	2.38843e+07	7.27166e+06	9.71401e+06	9.27219e+06	9.33746e+06	8.43026e+06	1.98209e+07	6.64507e+06	9.91187e+06	2.17641e+07	2.07816e+07	2.2194e+07	1.101e+07	2.02934e+07	9.15862e+06	2.27785e+07
BisMePA(32:1_18:2)	BisMePA	M+Na	945.728	20.4856	C55 H103 O8 N0 P1 Na1	4.40882e+07	3.26074e+07	2.57649e+07	4.26187e+07	4.02737e+07	2.20158e+07	1.71321e+07	3.94351e+07	1.3262e+07	2.81991e+07	2.74767e+07	2.29534e+07	3.02399e+07	2.31112e+07	3.0109e+07	2.84553e+07	2.70828e+07
BisMePA(30:1_20:4)	BisMePA	M+Na	941.697	19.562	C55 H99 O8 N0 P1 Na1	6.50589e+06	8.10393e+06	3.35757e+07	2.8461e+07	3.72083e+07	5.96679e+06	2.2445e+07	3.67399e+07	8.15987e+06	3.11513e+07	3.25382e+07	3.32516e+07	8.22381e+06	3.41102e+07	3.00396e+07	3.62348e+07	3.42071e+07
BisMePE(16:0e)	BisMePE	M+H	482.324	3.49782	C23 H49 O7 N1 P1	9.85451e+06	1.05036e+07	8.28514e+06	1.40242e+07	1.24359e+07	2.30734e+07	2.29107e+07	1.63189e+07	2.32521e+07	1.3204e+07	1.36081e+07	1.38604e+07	1.40326e+07	1.50398e+07	1.32876e+07	1.29849e+07	1.38305e+07
BisMePE(18:0e)	BisMePE	M+H	510.355	5.27563	C25 H53 O7 N1 P1	1.16447e+07	8.85695e+06	6.0761e+06	1.19234e+07	1.44275e+07	4.20229e+07	3.61741e+07	2.11593e+07	3.16839e+07	1.81714e+07	1.79917e+07	1.80692e+07	1.64151e+07	1.64602e+07	1.65504e+07	1.64624e+07	1.6096e+07
BisMePE(18:1e)	BisMePE	M+H	508.34	3.74297	C25 H51 O7 N1 P1	2.57601e+06	3.33182e+06	2.40546e+06	3.7723e+06	4.79438e+06	1.17263e+07	7.06272e+06	7.55122e+06	9.29536e+06	4.03163e+06	5.27951e+06	4.96605e+06	5.00775e+06	4.88811e+06	4.84681e+06	5.31473e+06	4.80804e+06
CL(70:1)	CL	M+H	1436.06	14.548	C79 H153 O17 P2	553199	1.10238e+06	5.07835e+06	2.63502e+06	1.27255e+06	0	775030	5.50367e+06	0	0	2.21475e+06	2.55885e+06	2.57399e+06	2.27193e+06	1.17972e+06	1.66826e+06	1.51003e+06
CL(70:3)	CL	M+H	1432.03	13.3842	C79 H149 O17 P2	4.57398e+08	3.8321e+08	2.71146e+08	2.688e+08	2.26285e+08	4.98091e+08	5.47093e+08	3.93837e+08	4.48057e+08	3.19145e+08	3.56291e+08	3.64933e+08	3.49833e+08	3.63362e+08	3.61375e+08	3.46643e+08	3.39617e+08
CL(70:4)	CL	M+H	1430.01	13.117	C79 H147 O17 P2	9.4525e+06	5.96452e+06	8.10158e+06	9.26661e+06	3.69962e+06	8.95353e+06	7.36674e+06	8.29845e+06	1.49483e+07	7.76855e+06	9.38383e+06	8.15188e+06	6.56255e+06	7.19178e+06	1.04559e+07	1.14483e+07	7.0264e+06
CL(70:5)	CL	M+H	1428	11.9895	C79 H145 O17 P2	2.53389e+06	4.02599e+06	3.78672e+06	4.64961e+06	1.37543e+06	4.34436e+06	4.2236e+06	4.52214e+06	6.99903e+06	4.34835e+06	2.88396e+06	2.42809e+06	3.09699e+06	3.80589e+06	2.01168e+06	3.08283e+06	3.28923e+06
CL(72:4)	CL	M+H	1458.04	13.4207	C81 H151 O17 P2	2.6986e+08	2.89709e+08	2.19333e+08	2.37586e+08	1.65637e+08	3.30592e+08	3.24834e+08	3.42371e+08	2.91251e+08	2.14022e+08	2.60581e+08	2.52742e+08	2.51191e+08	2.63572e+08	2.50196e+08	2.55462e+08	2.5363e+08
CL(72:7)	CL	M+Na	1473.98	19.327	C81 H144 O17 P2 Na1	5.26456e+07	5.58545e+07	3.84227e+07	3.19577e+07	3.36825e+07	3.03878e+07	2.6137e+07	5.11099e+07	2.52266e+07	2.51582e+07	3.54986e+07	3.77896e+07	3.27525e+07	3.65816e+07	3.80783e+07	3.55842e+07	3.39469e+07
CL(74:1)	CL	M+H	1492.12	15.7908	C83 H161 O17 P2	8.93479e+06	1.24381e+07	1.23471e+07	1.98051e+07	8.46955e+06	2.85524e+07	3.41435e+07	3.05789e+07	2.11664e+07	1.14282e+07	1.63112e+07	1.67006e+07	1.56396e+07	1.58152e+07	1.51802e+07	1.51607e+07	1.53122e+07
CL(74:3)	CL	M+H	1488.09	14.7659	C83 H157 O17 P2	3.90064e+08	3.34227e+08	2.36193e+08	2.86089e+08	2.27915e+08	6.48736e+08	6.55408e+08	4.33504e+08	4.85402e+08	3.45193e+08	3.7444e+08	3.6016e+08	3.85513e+08	3.62844e+08	3.56407e+08	3.8475e+08	3.78143e+08
CL(74:9)	CL	M+H	1476	12.0676	C83 H145 O17 P2	1.1298e+07	6.51308e+06	4.88318e+06	8.47876e+06	4.88233e+06	2.59399e+07	1.04911e+07	1.22552e+07	1.72572e+07	6.54407e+06	1.03374e+07	9.97557e+06	9.64489e+06	1.04926e+07	1.05977e+07	9.51947e+06	9.13064e+06
CL(76:11)	CL	M+H	1500	11.7245	C85 H145 O17 P2	3.81538e+06	6.33576e+06	4.37846e+06	3.66168e+06	4.10083e+06	1.07134e+07	7.97554e+06	5.73704e+06	1.0653e+07	5.9404e+06	4.8595e+06	6.10005e+06	4.15879e+06	4.66629e+06	4.76065e+06	3.42965e+06	4.95742e+06
CL(76:3)	CL	M+H	1516.12	13.4653	C85 H161 O17 P2	1.62172e+07	1.40431e+07	9.68198e+06	1.996e+07	1.77541e+07	2.47572e+07	1.86294e+07	2.04678e+07	1.193e+07	5.91275e+06	1.49417e+07	1.07678e+07	9.44525e+06	1.1093e+07	1.60294e+07	7.93972e+06	1.35123e+07
CL(76:4)	CL	M+H	1514.1	14.7404	C85 H159 O17 P2	2.47487e+07	2.77369e+07	1.8628e+07	2.53764e+07	1.70672e+07	2.86203e+07	3.32101e+07	2.90715e+07	2.79249e+07	2.01393e+07	2.3903e+07	2.70759e+07	2.64709e+07	2.55532e+07	2.51019e+07	2.46999e+07	2.63361e+07
CL(76:6)	CL	M+H	1510.07	14.7781	C85 H155 O17 P2	3.47884e+07	3.47242e+07	3.05018e+07	2.87922e+07	3.23728e+07	41340312	3.73518e+07	3.17175e+07	3.47153e+07	3.48141e+07	3.59597e+07	3.6838e+07	3.49166e+07	3.47443e+07	3.73042e+07	3.9376e+07	3.49472e+07
CL(76:9)	CL	M+H	1504.03	12.575	C85 H149 O17 P2	530318	1.37602e+06	900162	513228	1.39369e+06	377445	312447	1.65422e+06	1.01366e+06	0	1.22255e+06	360597	0	1.43091e+06	0	1.61801e+06	1.19617e+06
CL(78:3)	CL	M+H	1544.15	16.021	C87 H165 O17 P2	5.15995e+06	4.54176e+06	3.65649e+06	4.34484e+06	1.81828e+06	6.22634e+06	4.13102e+06	6.98988e+06	4.51204e+06	1.40764e+06	2.57292e+06	2.33731e+06	2.66597e+06	4.07809e+06	2.33214e+06	3.53523e+06	2.65814e+06
CL(78:4)	CL	M+H	1542.14	15.7682	C87 H163 O17 P2	1.95693e+07	2.37185e+07	1.72149e+07	2.08022e+07	1.15108e+07	2.58902e+07	2.23563e+07	2.94462e+07	2.88307e+07	1.24363e+07	2.08397e+07	1.91758e+07	1.87952e+07	1.99748e+07	1.90444e+07	1.90418e+07	1.98965e+07
CL(80:12)	CL	M+H	1554.04	12.7353	C89 H151 O17 P2	9.17118e+07	9.64697e+07	8.4289e+07	8.98617e+07	7.732e+07	1.733e+08	1.82578e+08	1.32779e+08	1.17849e+08	9.94937e+07	1.17964e+08	1.08645e+08	1.11929e+08	1.06088e+08	9.78611e+07	1.02619e+08	1.03685e+08
CL(82:11)	CL	M+H	1584.09	14.0504	C91 H157 O17 P2	1.30248e+08	1.2299e+08	9.90526e+07	8.83113e+07	1.50822e+08	1.95644e+08	2.00795e+08	1.20123e+08	1.32031e+08	1.57556e+08	1.49726e+08	1.5333e+08	1.59158e+08	1.34696e+08	1.51739e+08	1.3589e+08	1.53289e+08
CL(82:6)	CL	M+H	1594.17	14.243	C91 H167 O17 P2	1.81592e+06	3.49387e+07	4.23824e+07	4.44386e+06	3.25596e+07	2.77109e+07	1.68122e+07	2.62136e+07	2.52976e+07	3.73044e+07	3.45698e+07	5.32365e+06	2.60634e+06	2.79323e+06	3.32715e+07	3.31679e+07	5.54287e+06
CL(82:9)	CL	M+H	1588.12	14.9748	C91 H161 O17 P2	5.28921e+06	4.9101e+06	3.49266e+06	2.83427e+06	4.06922e+06	7.96899e+06	1.01981e+07	5.68396e+06	2.95056e+06	4.28034e+06	4.42846e+06	4.36308e+06	5.28057e+06	5.63443e+06	4.49953e+06	3.59186e+06	4.11632e+06
CL(84:12)	CL	M+H	1610.1	14.0159	C93 H159 O17 P2	3.59301e+06	363744	2.16245e+06	4.18903e+06	3.1965e+06	1.11564e+06	0	0	0	2.74186e+06	1.79643e+06	1.52551e+06	2.31838e+06	3.74185e+06	2.58488e+06	1.19783e+06	2.4735e+06
CL(88:10)	CL	M+Na	1692.18	13.713	C97 H170 O17 P2 Na1	7.21985e+06	7.94018e+06	1.06373e+07	4.64622e+06	1.3174e+07	8.27259e+06	3.88521e+06	3.68268e+06	1.45432e+06	5.89195e+06	6.84563e+06	6.83448e+06	7.44959e+06	6.84514e+06	8.13827e+06	6.06261e+06	5.53952e+06
CarE(14:0+O)	CarE	M+H	388.306	1.587	C21 H42 O5 N1	1.77334e+06	1.1144e+06	2.36072e+06	2.18454e+06	2.21145e+06	1.78655e+06	7.20886e+06	2.3002e+06	2.21457e+06	1.75852e+06	2.99807e+06	4.16611e+06	3.24536e+06	3.21887e+06	3.79064e+06	2.80216e+06	2.73729e+06
CarE(16:0+O)	CarE	M+H	416.337	2.23938	C23 H46 O5 N1	5.16353e+06	5.60593e+06	4.03256e+06	6.82681e+06	6.10039e+06	4.00131e+06	1.10912e+07	5.43808e+06	7.27489e+06	2.82389e+06	5.78602e+06	5.3058e+06	4.69036e+06	4.44558e+06	4.53272e+06	3.9592e+06	4.46853e+06
CarE(16:1+O)	CarE	M+H	414.321	1.74598	C23 H44 O5 N1	1.82398e+06	2.40127e+06	1.80945e+06	3.43086e+06	9.09076e+06	1.45438e+06	1.7145e+06	3.0809e+06	4.63362e+06	833209	2.95142e+06	2.61074e+06	2.47603e+06	2.61955e+06	2.14312e+06	2.51315e+06	2.20925e+06
CarE(18:0+O)	CarE	M+H	444.368	3.41129	C25 H50 O5 N1	2.0061e+06	1.94851e+06	1.69556e+06	2.83335e+06	2.16068e+06	1.11529e+06	4.37386e+06	2.09636e+06	3.67452e+06	390003	2.69807e+06	1.30103e+06	2.56252e+06	1.96312e+06	1.97158e+06	2.58854e+06	1.54007e+06
CarE(18:1+O)	CarE	M+H	442.353	2.43354	C25 H48 O5 N1	5.1631e+06	5.2645e+06	3.0395e+06	4.58386e+06	695480	2.22704e+06	2.26925e+06	5.08435e+06	5.55188e+06	697595	3.51818e+06	2.39091e+06	4.24372e+06	1.15524e+06	3.68989e+06	3.21817e+06	2.88771e+06
Cer(d28:0)	Cer	M+H	456.441	7.537	C28 H58 O3 N1	629590	1.56285e+06	630292	983527	882699	1.82018e+06	857160	533411	842836	1.30825e+06	1.29026e+06	1.15849e+06	1.09188e+06	1.27088e+06	1.2052e+06	1.34151e+06	1.14952e+06
Cer(d30:0)	Cer	M+H	484.472	8.983	C30 H62 O3 N1	982033	2.21497e+06	1.20117e+06	1.79179e+06	839037	2.24974e+06	1.21048e+06	549495	704456	2.02187e+06	1.88522e+06	2.01e+06	2.12195e+06	1.80683e+06	1.13647e+06	1.73383e+06	1.99824e+06
Cer(d32:0)	Cer	M+H	512.504	10.595	C32 H66 O3 N1	8.90004e+06	1.67526e+07	9.95337e+06	1.25018e+07	1.1195e+07	1.67672e+07	1.2868e+07	6.82688e+06	9.54791e+06	1.39264e+07	1.3881e+07	1.50706e+07	1.50101e+07	1.43942e+07	1.29816e+07	1.37347e+07	1.58198e+07
Cer(d33:0)	Cer	M+H	526.519	11.4457	C33 H68 O3 N1	2.31346e+07	2.50656e+07	2.86739e+07	1.25205e+07	1.31643e+07	1.4905e+07	6.65864e+07	1.63223e+07	1.16129e+07	2.22747e+07	2.8595e+07	3.00459e+07	3.01953e+07	2.98799e+07	2.90315e+07	2.80784e+07	2.89449e+07
Cer(d18:0_16:0)	Cer	M+H	540.535	14.6115	C34 H70 O3 N1	9.91655e+07	8.82033e+07	1.00909e+08	1.40307e+08	9.06937e+07	1.17466e+08	1.42882e+08	9.73857e+07	1.0527e+08	8.86417e+07	9.99675e+07	9.88118e+07	9.87722e+07	1.0135e+08	9.64547e+07	9.47022e+07	9.75956e+07
Cer(d18:1_16:0+O)	Cer	M+H	554.514	13.5554	C34 H68 O4 N1	9.06882e+06	7.10231e+06	1.32983e+07	1.50419e+07	6.13919e+06	7.73854e+06	1.39573e+07	1.23067e+07	6.70401e+06	4.0995e+06	8.06262e+06	7.87087e+06	7.52094e+06	7.95114e+06	7.26404e+06	7.89991e+06	7.52432e+06
Cer(d18:1_16:1)	Cer	M+H	536.504	13.5431	C34 H66 O3 N1	7.34493e+06	6.27157e+06	8.92788e+06	1.22244e+07	5.12989e+06	4.70931e+06	1.14158e+07	9.97065e+06	4.31124e+06	2.76094e+06	6.24961e+06	6.95634e+06	5.98206e+06	5.56147e+06	5.49677e+06	5.29864e+06	5.91017e+06
Cer(d19:2_16:1)	Cer	M+H	548.504	15.6964	C35 H66 O3 N1	8.54094e+06	6.94438e+06	9.59011e+06	1.78198e+06	3.6948e+06	4.18076e+06	1.53518e+07	2.28618e+06	2.85387e+06	1.00355e+07	8.43624e+06	9.26766e+06	8.25985e+06	1.05839e+07	1.0095e+07	1.00462e+07	1.00533e+07
Cer(d37:0)	Cer	M+H	582.582	14.811	C37 H76 O3 N1	1.4485e+06	2.97108e+06	2.09526e+06	1.61902e+06	1.38405e+06	758600	9.32272e+06	1.33431e+06	894553	1.0533e+06	3.14336e+06	1.83791e+06	2.58232e+06	2.51131e+06	1.3334e+06	2.24706e+06	3.02703e+06
Cer(d19:0_18:0)	Cer	M+H	582.582	16.8381	C37 H76 O3 N1	3.35022e+06	6.39349e+06	5.67974e+06	4.34302e+06	4.73017e+06	4.79066e+06	2.07545e+07	4.49179e+06	5.11768e+06	4.43319e+06	6.3053e+06	7.19106e+06	6.72696e+06	6.08116e+06	6.44772e+06	6.45923e+06	7.71118e+06
Cer(d38:0)	Cer	M+H	596.598	15.5598	C38 H78 O3 N1	3.89757e+06	5.44149e+06	3.88747e+06	4.69349e+06	5.35696e+06	6.93557e+06	2.91909e+06	2.25485e+06	3.32429e+06	4.35019e+06	5.38078e+06	5.98985e+06	4.92655e+06	6.15135e+06	5.45293e+06	5.31178e+06	6.31488e+06
Cer(d20:2_18:0+2O)	Cer	M+NH4	641.583	24.144	C38 H77 O5 N2	966858	2.07354e+06	1.78778e+06	1.05857e+06	1.06151e+06	1.97788e+06	1.19418e+06	1.12723e+06	1.10203e+06	2.42485e+06	1.48616e+06	1.8664e+06	312350	977954	216717	3.23797e+06	1.8047e+06
Cer(d18:0_20:5)	Cer	M+H	586.519	13.934	C38 H68 O3 N1	1.15e+07	8.65465e+06	6.24201e+06	9.78344e+06	6.14617e+06	1.23441e+07	1.18658e+07	8.27902e+06	1.29746e+07	7.49022e+06	7.77044e+06	8.86882e+06	6.70821e+06	8.80379e+06	7.83186e+06	8.66647e+06	8.62278e+06
Cer(d18:0_22:0)	Cer	M+H	624.629	18.1473	C40 H82 O3 N1	1.46605e+08	1.36122e+08	1.10672e+08	1.9621e+08	1.27985e+08	2.64954e+08	2.0286e+08	1.69639e+08	2.17955e+08	1.08165e+08	1.44662e+08	1.403e+08	1.48625e+08	1.47705e+08	1.40875e+08	1.40983e+08	1.51844e+08
Cer(d22:0_18:0+2O)	Cer	M+H	656.619	16.478	C40 H82 O5 N1	2.19783e+06	2.38e+06	1.64629e+06	1.75951e+06	880783	2.22139e+06	2.7907e+06	1.85619e+06	3.4867e+06	2.57611e+06	2.16462e+06	2.18689e+06	1.52043e+06	2.12666e+06	2.45843e+06	1.4365e+06	2.42209e+06
Cer(d18:1_22:0+O)	Cer	M+H	638.608	16.8734	C40 H80 O4 N1	4.62276e+06	4.2968e+06	5.71789e+06	5.74747e+06	3.462e+06	9.69845e+06	1.34225e+07	9.19034e+06	4.70394e+06	4.74438e+06	6.47619e+06	5.93503e+06	5.84362e+06	5.21707e+06	7.42812e+06	5.98299e+06	6.5216e+06
Cer(d18:0_23:0)	Cer	M+H	638.645	18.5384	C41 H84 O3 N1	7.31085e+07	7.09136e+07	5.6872e+07	8.97019e+07	5.19974e+07	1.06355e+08	9.15433e+07	8.84927e+07	1.00997e+08	5.79015e+07	7.24353e+07	7.24242e+07	7.04421e+07	7.78954e+07	7.42929e+07	7.04008e+07	7.10675e+07
Cer(d18:0_23:0+O)	Cer	M+H	654.639	19.0623	C41 H84 O4 N1	1.12769e+07	1.00004e+07	1.28581e+07	1.23527e+07	9.59767e+06	1.3127e+07	2.45147e+07	1.03473e+07	2.05723e+07	2.26116e+07	1.57743e+07	1.02533e+07	1.33382e+07	1.25738e+07	1.58674e+07	1.72647e+07	1.63398e+07
Cer(d18:0_24:1)	Cer	M+H	650.645	18.0551	C42 H84 O3 N1	1.58562e+08	1.9281e+08	1.92736e+08	3.07884e+08	1.75019e+08	3.96416e+08	4.34138e+08	3.00486e+08	2.78584e+08	1.51824e+08	2.18271e+08	2.25628e+08	2.06693e+08	2.19678e+08	2.20539e+08	2.17548e+08	2.1157e+08
Cer(d18:1_24:0+O)	Cer	M+H	666.639	17.1998	C42 H84 O4 N1	6.3165e+07	6.37125e+07	5.59453e+07	6.79314e+07	4.56723e+07	1.05278e+08	1.26637e+08	8.2937e+07	9.0197e+07	6.72926e+07	6.64202e+07	6.86633e+07	6.54135e+07	6.47017e+07	6.39897e+07	6.37773e+07	6.70361e+07
Cer(d18:1_24:1)	Cer	M+H	648.629	17.7299	C42 H82 O3 N1	2.93986e+09	2.61182e+09	3.10175e+09	4.02858e+09	2.21317e+09	3.6103e+09	4.71346e+09	3.88227e+09	2.78955e+09	2.48294e+09	3.05538e+09	3.05484e+09	2.92493e+09	2.95977e+09	2.91207e+09	2.99453e+09	2.99914e+09
Cer(d24:2_18:0+O)	Cer	M+NH4	681.65	19.488	C42 H85 O4 N2	1.97576e+06	1.79852e+06	1.82041e+06	535556	351029	2.00563e+06	762959	3.96097e+06	469367	161586	343712	4.04779e+06	1.24017e+06	4.05917e+06	4.67597e+06	4.23021e+06	4.33878e+06
Cer(d18:2_24:1)	Cer	M+H	646.613	15.834	C42 H80 O3 N1	6.81841e+06	9.08657e+06	9.76972e+06	1.44956e+07	1.00034e+07	1.99897e+07	2.45201e+07	1.4758e+07	1.10469e+07	1.06926e+07	1.10184e+07	1.35124e+07	1.25365e+07	1.21409e+07	1.0976e+07	1.12117e+07	1.11857e+07
Cer(d18:1_24:2)	Cer	M+H	646.613	16.8038	C42 H80 O3 N1	6.85924e+08	7.14647e+08	8.03401e+08	1.18777e+09	5.76811e+08	9.98533e+08	1.75622e+09	1.14571e+09	6.8763e+08	6.63434e+08	8.19346e+08	8.02135e+08	8.16522e+08	7.76658e+08	7.8325e+08	8.01328e+08	8.08646e+08
Cer(d18:2_24:2)	Cer	M+H	644.598	15.6972	C42 H78 O3 N1	4.62603e+07	1.93319e+07	2.08339e+07	3.82496e+07	1.32307e+07	2.68238e+07	5.12034e+07	7.5257e+07	1.99096e+07	1.66384e+07	2.20551e+07	2.11458e+07	2.18107e+07	2.11476e+07	1.85654e+07	2.02834e+07	1.9619e+07
Cer(d19:1_23:3)	Cer	M+H	644.598	17.8273	C42 H78 O3 N1	8.85062e+08	9.41086e+08	6.82298e+08	7.27628e+08	8.0266e+08	1.02061e+09	9.59264e+08	8.91901e+08	8.32798e+08	9.94719e+08	9.08575e+08	8.85086e+08	8.60224e+08	8.63853e+08	7.97212e+08	9.29919e+08	8.5832e+08
Cer(d18:1_24:4)	Cer	M+H	642.582	14.967	C42 H76 O3 N1	1.53985e+06	1.89442e+06	3.0807e+06	4.50878e+06	3.39784e+06	5.81867e+06	1.01968e+07	5.04793e+06	4.00804e+06	5.23085e+06	2.88784e+06	4.42841e+06	3.67536e+06	2.44592e+06	3.16612e+06	2.61034e+06	4.11651e+06
Cer(d18:0_24:5)	Cer	M+H	642.582	16.8866	C42 H76 O3 N1	2.96501e+08	2.31644e+08	1.77791e+08	1.83574e+08	2.26228e+08	3.08458e+08	3.06778e+08	2.10381e+08	2.46856e+08	2.80253e+08	2.13754e+08	2.09084e+08	2.07755e+08	1.97498e+08	2.00555e+08	2.00073e+08	2.15719e+08
Cer(d18:0_25:0)	Cer	M+H	666.676	19.2231	C43 H88 O3 N1	9.40105e+06	8.29564e+06	9.13247e+06	9.31191e+06	6.42183e+06	7.70926e+06	6.49636e+06	1.09194e+07	1.09118e+07	7.64021e+06	7.27669e+06	8.96064e+06	8.60442e+06	9.16481e+06	8.50706e+06	8.88901e+06	8.87471e+06
Cer(d19:2_24:0+O)	Cer	M+H	678.639	19.38	C43 H84 O4 N1	2.18343e+07	1.27446e+07	7.57056e+06	9.80109e+06	3.29089e+06	6.36891e+06	5.335e+06	1.2212e+07	7.54962e+06	6.38716e+06	7.40387e+06	5.66932e+06	1.03717e+07	8.69969e+06	9.07624e+06	9.09851e+06	7.75903e+06
Cer(d19:1_24:6)	Cer	M+H	652.566	18.8706	C43 H74 O3 N1	1.61557e+06	1.71214e+06	1.28391e+06	1.80465e+06	677080	5.59516e+06	4.23264e+06	2.67e+06	2.35665e+06	3.03807e+06	2.37293e+06	1.46562e+06	2.71923e+06	2.04068e+06	1.77329e+06	3.24732e+06	2.87018e+06
Cer(m17:1_17:1)	Cer	M+H	520.509	12.641	C34 H66 O2 N1	1.1693e+06	245879	3.6514e+06	3.86344e+06	658830	2.96598e+06	4.68226e+06	2.54275e+06	2.25866e+06	5.59629e+06	3.72195e+06	3.41446e+06	2.86524e+06	3.07303e+06	3.82112e+06	5.64718e+06	4.50697e+06
Cer(m18:0_18:0)	Cer	M+H	552.571	16.4531	C36 H74 O2 N1	3.93787e+06	3.10963e+06	3.54407e+06	4.31686e+06	2.55012e+06	8.98739e+06	9.27084e+06	6.26935e+06	6.02769e+06	5.11317e+06	4.95167e+06	5.33077e+06	4.68522e+06	4.77895e+06	4.80868e+06	4.75255e+06	5.09212e+06
Cer(m36:0+O)	Cer	M+Na	590.548	15.9883	C36 H73 O3 N1 Na1	1.33291e+07	1.00452e+07	1.0134e+07	1.3221e+07	1.01787e+07	1.50373e+07	1.69298e+07	1.1835e+07	8.10207e+06	7.95518e+06	1.12166e+07	9.96097e+06	1.11801e+07	1.09165e+07	1.01025e+07	1.09319e+07	1.08808e+07
Cer(m36:1+O)	Cer	M+Na	588.533	15.5749	C36 H71 O3 N1 Na1	4.50542e+07	3.10845e+07	5.211e+07	5.87622e+07	4.84165e+07	5.21461e+07	5.56735e+07	4.19136e+07	2.56216e+07	3.6396e+07	4.10367e+07	3.90249e+07	4.04996e+07	4.66304e+07	4.06499e+07	4.20051e+07	4.40032e+07
Cer(m18:0_20:0)	Cer	M+H	580.603	17.5738	C38 H78 O2 N1	5.75632e+06	5.19786e+06	5.30169e+06	6.6046e+06	4.63178e+06	9.87785e+06	1.07038e+07	9.20133e+06	1.03403e+07	8.05292e+06	6.56802e+06	7.14541e+06	6.69411e+06	7.0118e+06	6.90409e+06	6.91975e+06	7.15695e+06
Cer(m18:0_22:0)	Cer	M+H	608.634	18.4569	C40 H82 O2 N1	2.77306e+07	2.54248e+07	1.95363e+07	2.66621e+07	1.36473e+07	3.29901e+07	3.02439e+07	3.18779e+07	3.70299e+07	3.553e+07	2.45301e+07	2.38494e+07	2.40449e+07	2.35053e+07	2.35479e+07	2.42225e+07	2.40789e+07
Cer(m22:1_18:1)	Cer	M+H	604.603	19.346	C40 H78 O2 N1	3.51592e+06	2.49593e+06	1.38422e+06	4.25385e+06	4.26099e+06	5.96723e+06	3.3744e+06	2.72315e+06	4.34033e+06	2.90804e+06	5.02952e+06	3.53289e+06	2.07362e+06	2.73088e+06	2.84548e+06	3.89006e+06	3.01255e+06
Cer(m18:0_23:0)	Cer	M+H	622.65	18.8215	C41 H84 O2 N1	9.50803e+06	8.23419e+06	7.87642e+06	8.88738e+06	4.13276e+06	1.24325e+07	1.29396e+07	1.26389e+07	1.4991e+07	1.43407e+07	8.77464e+06	9.43406e+06	9.00666e+06	8.58716e+06	8.64553e+06	8.78822e+06	9.01507e+06
Cer(m18:0_24:0)	Cer	M+H	636.665	19.156	C42 H86 O2 N1	2.24097e+07	1.92013e+07	1.59622e+07	2.24364e+07	1.1783e+07	2.76287e+07	2.43499e+07	2.70282e+07	2.78487e+07	2.32814e+07	2.10018e+07	1.92668e+07	2.08219e+07	1.9967e+07	2.00532e+07	1.92718e+07	2.04524e+07
Cer(m18:1_24:1)	Cer	M+H	632.634	17.636	C42 H82 O2 N1	7.26226e+07	7.06398e+07	8.30036e+07	1.29703e+08	6.2524e+07	8.25271e+07	1.36187e+08	1.01608e+08	8.98277e+07	7.16206e+07	7.41482e+07	7.64141e+07	7.47531e+07	6.76888e+07	7.18906e+07	6.96947e+07	7.99913e+07
Cer(m17:1_25:1)	Cer	M+H	632.634	19.974	C42 H82 O2 N1	393687	0	1.12099e+06	3.12144e+06	1.05395e+06	2.6606e+06	1.31175e+06	2.20562e+06	0	0	1.17862e+06	0	1.16941e+06	0	0	946211	874773
Cer(m17:1_25:2)	Cer	M+H	630.618	16.8145	C42 H80 O2 N1	3.18362e+07	4.54432e+07	4.13292e+07	8.55266e+07	3.21099e+07	8.81636e+07	8.49237e+07	5.82709e+07	4.79698e+07	4.17958e+07	5.02395e+07	4.52875e+07	4.11051e+07	4.19884e+07	3.91321e+07	3.49283e+07	4.44721e+07
Cer(m18:0_25:1)	Cer	M+Na	670.647	17.4308	C43 H85 O2 N1 Na1	3.36804e+07	2.30232e+07	2.22604e+07	1.42171e+07	2.27406e+07	2.43449e+07	2.19331e+07	2.40568e+07	2.08846e+07	2.21284e+07	2.47188e+07	1.89154e+07	2.37304e+07	1.81569e+07	2.32521e+07	2.4822e+07	2.30213e+07
Cer(t39:1)	Cer	M+H	624.593	17.6061	C39 H78 O4 N1	3.31345e+07	3.97669e+07	3.16603e+07	2.00548e+07	2.12932e+07	2.97207e+07	8.055e+07	6.8095e+06	5.28033e+07	5.36506e+07	3.24553e+07	3.17794e+07	2.8651e+07	3.05222e+07	3.02591e+07	3.06269e+07	3.1229e+07
Cer(t40:2+O)	Cer	M+NH4	669.614	18.366	C40 H81 O5 N2	1.03014e+07	1.09756e+07	1.09445e+07	1.48089e+07	2.11188e+07	1.97633e+07	1.24872e+07	1.38302e+07	2.09265e+07	1.49571e+07	1.48e+07	1.30379e+07	1.31078e+07	1.48978e+07	1.48751e+07	1.44324e+07	1.54455e+07
Cer(t18:0_24:0)	Cer	M+H	668.655	18.1191	C42 H86 O4 N1	7.43913e+07	6.63981e+07	5.67305e+07	6.74578e+07	4.43842e+07	1.08818e+08	9.93008e+07	8.09983e+07	9.68817e+07	6.62855e+07	6.57674e+07	7.11642e+07	6.72696e+07	7.18474e+07	6.58769e+07	6.38755e+07	6.56222e+07
Cer(t18:1_24:0+O)	Cer	M+H	682.634	16.3987	C42 H84 O5 N1	4.55213e+06	4.58495e+06	8.18599e+06	4.81145e+06	2.30021e+06	5.23625e+06	9.26113e+06	6.85376e+06	5.58324e+06	5.21548e+06	5.7145e+06	6.22007e+06	3.53215e+06	5.15104e+06	4.17713e+06	4.80675e+06	4.57432e+06
CerG2GNAc1(d42:1)	CerG2GNAc1	M+H	1177.83	17.3692	C62 H117 O18 N2	4.95565e+06	6.06493e+06	5.32455e+06	6.614e+06	3.41441e+06	7.60459e+06	7.50669e+06	7.91813e+06	7.03362e+06	5.26626e+06	5.61149e+06	5.92341e+06	5.96616e+06	5.63865e+06	5.4273e+06	5.81326e+06	5.5274e+06
CerG2GNAc1(d42:2)	CerG2GNAc1	M+H	1175.81	16.2015	C62 H115 O18 N2	5.03413e+06	6.74192e+06	5.90651e+06	8.06303e+06	3.64595e+06	7.03556e+06	1.10996e+07	1.19546e+07	6.27514e+06	6.56737e+06	7.33706e+06	6.58764e+06	5.49419e+06	6.56042e+06	6.11533e+06	6.63928e+06	6.68373e+06
ChE(13:0)	ChE	M+NH4	600.571	15.5969	C40 H74 O2 N1	1.22929e+07	1.70266e+07	1.55373e+07	2.2368e+07	1.11356e+07	2.24523e+07	3.21254e+07	1.90865e+07	1.65204e+07	1.6606e+07	1.57666e+07	1.61157e+07	1.68421e+07	1.59778e+07	1.50191e+07	1.40252e+07	1.43188e+07
ChE(16:0)	ChE	M+NH4	642.618	21.2026	C43 H80 O2 N1	1.59006e+06	1.48237e+06	0	2.72641e+06	1.90347e+06	1.15555e+07	1.03057e+07	6.87152e+06	9.37838e+06	7.84933e+06	5.93528e+06	6.2163e+06	4.63447e+06	5.02701e+06	4.65158e+06	8.19009e+06	4.40785e+06
ChE(18:0)	ChE	M+H	653.623	15.594	C45 H81 O2	519039	1.76599e+06	2.09205e+06	753427	3.32728e+06	1.69747e+06	677586	1.95096e+06	447074	1.26683e+06	1.02766e+06	2.07513e+06	204998	2.96677e+06	1.39511e+06	1.43151e+06	602479
ChE(18:1)	ChE	M+NH4	668.634	21.18	C45 H82 O2 N1	7.89972e+07	6.40611e+07	3.70642e+07	7.78965e+07	6.68018e+07	2.22873e+08	2.1511e+08	1.92443e+08	1.39053e+08	1.56622e+08	1.41821e+08	1.30645e+08	1.12719e+08	1.15472e+08	1.11726e+08	1.3367e+08	1.09546e+08
ChE(18:2)	ChE	M+NH4	666.618	20.7469	C45 H80 O2 N1	8.13751e+07	6.48567e+07	2.12637e+07	6.26667e+07	3.60482e+07	9.42165e+07	9.49269e+07	1.29306e+08	5.49445e+07	5.85013e+07	7.59986e+07	5.33163e+07	6.52898e+07	6.45827e+07	5.89751e+07	6.77147e+07	7.63681e+07
ChE(19:0)	ChE	M+NH4	684.665	18.424	C46 H86 O2 N1	6.25272e+06	6.55806e+06	2.24089e+06	3.91257e+06	8.08104e+06	3.28022e+06	2.33906e+06	5.28602e+06	2.29836e+06	6.06303e+06	6.29448e+06	5.08496e+06	5.15134e+06	6.67606e+06	6.09072e+06	6.69104e+06	6.48417e+06
ChE(20:0)	ChE	M+H	681.654	19.016	C47 H85 O2	1.04822e+07	2.34826e+07	6.70126e+06	350422	6.52762e+06	1.50919e+07	8.25787e+06	1.47014e+07	1.38815e+07	9.65779e+06	1.48264e+07	1.49532e+07	5.58262e+06	1.59761e+07	1.32625e+07	1.89457e+07	9.71786e+06
ChE(20:4)	ChE	M+H	673.592	21.1727	C47 H77 O2	1.08572e+07	7.16387e+06	403126	4.83805e+06	4.98213e+06	1.17276e+07	1.2537e+07	1.92568e+07	7.33508e+06	1.10142e+07	9.36254e+06	8.27856e+06	1.00084e+07	9.00991e+06	8.97472e+06	8.14512e+06	9.40938e+06
ChE(22:6)	ChE	M+NH4	714.618	20.1677	C49 H80 O2 N1	5.39666e+07	4.87214e+07	1.79626e+07	3.74332e+07	2.06994e+07	2.64768e+07	2.7169e+07	4.44589e+07	1.58395e+07	3.13152e+07	2.90706e+07	2.89429e+07	3.38542e+07	3.22478e+07	3.21065e+07	3.07667e+07	3.55734e+07
ChE(2:0)	ChE	M+NH4	446.399	2.22906	C29 H52 O2 N1	2.52695e+07	2.52406e+07	1.98514e+07	1.977e+07	1.36013e+07	2.1488e+07	5.92313e+06	2.85911e+07	2.98928e+07	2.09937e+07	2.24312e+07	2.39462e+07	2.24447e+07	1.97261e+07	2.33741e+07	2.2379e+07	2.22198e+07
ChE(32:0)	ChE	M+H	849.842	22.1481	C59 H109 O2	5.15572e+06	9.8251e+06	1.10701e+07	9.85574e+06	5.87649e+06	8.94323e+06	1.22016e+07	6.04433e+06	1.91066e+07	1.15973e+07	8.68367e+06	8.36847e+06	8.17486e+06	8.26897e+06	7.99743e+06	8.33822e+06	9.00435e+06
ChE(34:0)	ChE	M+H	877.874	22.423	C61 H113 O2	1.38563e+06	2.48482e+06	2.6822e+06	2.7927e+06	1.43542e+06	2.9841e+06	3.87872e+06	1.14961e+06	8.70811e+06	4.05693e+06	2.78977e+06	2.65432e+06	2.90545e+06	2.81508e+06	2.67445e+06	2.48897e+06	3.08447e+06
CmE(26:0)	CmE	M+H	779.764	20.9321	C54 H99 O2	4.51503e+08	5.22945e+08	2.77329e+08	2.43827e+08	2.76556e+08	6.48611e+08	6.69185e+08	4.08997e+08	3.14605e+08	4.39216e+08	4.20023e+08	4.11014e+08	4.16147e+08	4.0541e+08	4.22391e+08	4.14342e+08	4.03905e+08
CmE(28:0)	CmE	M+H	807.795	21.298	C56 H103 O2	6.42791e+07	8.69595e+07	5.2612e+07	4.92987e+07	5.39336e+07	1.41678e+08	1.19412e+08	7.06798e+07	7.66115e+07	8.081e+07	7.67377e+07	7.06127e+07	8.42637e+07	7.12448e+07	8.56229e+07	7.24029e+07	7.38046e+07
CmE(28:1)	CmE	M+H	805.78	20.9185	C56 H101 O2	6.13187e+07	6.69386e+07	3.97566e+07	3.55766e+07	3.7451e+07	9.83742e+07	7.42481e+07	5.57061e+07	5.051e+07	6.54505e+07	5.65769e+07	5.89556e+07	6.32652e+07	5.64338e+07	5.5703e+07	5.81522e+07	5.64372e+07
CmE(28:5)	CmE	M+H	797.717	20.16	C56 H93 O2	4.05173e+07	5.13981e+07	6.23347e+07	6.51534e+07	5.00091e+07	1.73473e+07	1.63713e+07	5.55167e+07	3.06077e+07	1.03797e+07	3.18221e+07	3.34332e+07	3.9807e+07	2.72489e+07	3.62761e+07	3.16936e+07	2.91586e+07
CmE(2:0)	CmE	M+NH4	460.415	10.2784	C30 H54 O2 N1	1.22806e+06	737443	6.08539e+06	3.17708e+06	826840	6.12971e+06	4.28552e+06	2.89223e+06	2.5071e+06	1.16858e+06	2.86354e+06	2.25838e+06	2.50187e+06	2.64233e+06	2.44702e+06	2.39269e+06	2.98781e+06
CmE(30:1)	CmE	M+H	833.811	21.3	C58 H105 O2	5.37721e+06	6.31766e+06	2.32565e+06	2.49298e+06	2.06298e+06	1.20971e+07	6.40498e+06	4.11397e+06	3.26832e+06	7.80791e+06	4.97456e+06	5.47549e+06	5.50581e+06	4.32448e+06	4.33166e+06	5.64158e+06	4.99903e+06
CmE(30:6)	CmE	M+H	823.733	18.8961	C58 H95 O2	2.9829e+06	4.93034e+06	5.11291e+06	3.56074e+06	975052	1.11709e+06	1.95198e+06	3.33932e+06	2.61035e+06	1.83061e+06	2.006e+06	2.34286e+06	2.46339e+06	2.97701e+06	2.06113e+06	2.4523e+06	2.6768e+06
CmE(38:1)	CmE	M+NH4	962.963	22.729	C66 H124 O2 N1	1.26013e+06	1.70339e+06	1.96733e+06	1.03518e+06	792234	6.15033e+06	8.03243e+06	1.53233e+06	1.27784e+07	1.00586e+07	2.50675e+06	4.23695e+06	4.0269e+06	4.38347e+06	4.36174e+06	4.23063e+06	3.81619e+06
CmE(4:0)	CmE	M+NH4	488.446	7.833	C32 H58 O2 N1	135210	0	2.70613e+06	2.26331e+06	692661	1.65322e+06	1.90084e+06	419183	265234	0	781667	873096	991393	966015	1.10464e+06	973480	981837
Co(Q10)	Co	M+NH4	880.718	19.4785	C59 H94 O4 N1	2.68948e+08	2.97822e+08	2.49007e+08	3.3758e+08	1.87175e+08	4.14437e+08	5.25573e+08	3.43331e+08	3.75011e+08	3.11107e+08	3.2745e+08	3.37131e+08	3.33134e+08	3.29715e+08	3.27638e+08	3.36089e+08	3.25636e+08
Co(Q6)	Co	M+H	591.441	18.5074	C39 H59 O4	2.46215e+07	2.34391e+07	2.02867e+07	2.78727e+07	1.97629e+07	4.12962e+07	5.01428e+07	3.14806e+07	3.38963e+07	3.14597e+07	3.23375e+07	2.78798e+07	3.01782e+07	2.92776e+07	2.69783e+07	2.90926e+07	2.88383e+07
Co(Q7)	Co	M+H	659.503	18.5113	C44 H67 O4	2.39638e+07	2.50576e+07	1.85677e+07	2.26025e+07	1.84361e+07	4.00407e+07	4.8218e+07	2.99777e+07	3.07255e+07	3.2167e+07	2.85836e+07	2.88757e+07	2.58046e+07	2.53595e+07	2.60128e+07	2.56907e+07	2.46829e+07
Co(Q8)	Co	M+H	727.566	17.166	C49 H75 O4	5.31403e+08	5.21443e+08	4.08995e+08	5.35403e+08	3.97267e+08	9.34322e+08	1.01591e+09	7.2451e+08	7.33052e+08	6.17536e+08	5.74791e+08	5.8398e+08	5.70334e+08	5.75486e+08	5.5166e+08	5.62389e+08	5.66807e+08
Co(Q9)	Co	M+NH4	812.655	18.5092	C54 H86 O4 N1	7.18261e+09	7.0678e+09	5.6473e+09	6.91547e+09	5.35556e+09	1.2088e+10	1.46116e+10	8.93698e+09	1.01937e+10	8.94789e+09	8.39694e+09	8.21194e+09	8.34968e+09	8.17548e+09	8.26218e+09	8.10257e+09	8.35745e+09
DG(13:0)	DG	M+Na	325.199	1.234	C16 H30 O5 Na1	3.4091e+06	3.57302e+06	4.15536e+06	4.11908e+06	1.81098e+06	2.28208e+06	3.49817e+06	9.15788e+06	2.49139e+06	1.33899e+06	3.8536e+06	3.26487e+06	3.57066e+06	3.34017e+06	3.04904e+06	3.73261e+06	3.6975e+06
DG(4:0_10:1)	DG	M+Na	337.199	1.19041	C17 H30 O5 Na1	4.25851e+06	6.91363e+06	4.95152e+06	6.85568e+06	3.12584e+06	2.73389e+06	3.31997e+06	4.12736e+06	7.54752e+06	1.6594e+06	3.9562e+06	3.81443e+06	3.92436e+06	3.8591e+06	3.78826e+06	3.74758e+06	4.52435e+06
DG(4:0_10:2)	DG	M+Na	335.183	1.236	C17 H28 O5 Na1	5.09346e+06	2.80362e+06	4.39519e+06	5.9121e+06	3.56234e+06	2.65722e+06	4.91891e+06	4.04124e+06	4.65345e+06	3.51145e+06	1.88932e+06	4.69968e+06	6.22274e+06	2.42521e+06	5.52967e+06	4.1771e+06	3.25377e+06
DG(6:0_9:0)	DG	M+NH4	348.274	1.1934	C18 H38 O5 N1	3.77881e+06	9.4871e+06	1.01779e+07	1.30514e+07	2.39121e+07	4.86987e+06	3.69557e+06	5.19206e+06	1.11085e+07	2.98401e+06	8.60285e+06	8.3476e+06	8.26862e+06	8.61452e+06	8.0082e+06	9.03075e+06	8.1572e+06
DG(15:0)	DG	M+Na	353.23	1.1934	C18 H34 O5 Na1	2.6273e+07	6.98094e+07	8.3861e+07	1.10444e+08	7.8801e+07	2.78436e+07	3.26284e+07	4.82083e+07	6.73641e+07	2.01117e+07	5.43369e+07	5.44639e+07	5.43982e+07	5.29071e+07	5.30307e+07	4.78052e+07	5.20473e+07
DG(4:0_11:2)	DG	M+Na	349.199	1.20274	C18 H30 O5 Na1	8.58398e+06	2.16762e+07	1.26704e+07	2.39833e+07	1.19831e+07	6.77162e+06	8.68269e+06	9.43527e+06	1.88235e+07	8.23418e+06	1.5814e+07	1.45926e+07	1.65504e+07	1.39892e+07	1.49917e+07	1.04362e+07	1.47067e+07
DG(4:0_11:3)	DG	M+Na	347.183	1.23864	C18 H28 O5 Na1	4.87878e+06	6.51332e+06	5.74368e+06	6.02415e+06	2.01472e+06	4.12106e+06	5.18858e+06	4.02633e+06	4.78382e+06	4.6238e+06	4.3734e+06	4.63109e+06	4.619e+06	5.32342e+06	4.62736e+06	4.94313e+06	4.92301e+06
DG(4:0_11:4)	DG	M+NH4	340.212	1.39505	C18 H30 O5 N1	3.8065e+06	6.19071e+06	3.9727e+06	3.63821e+06	1.53886e+06	1.0075e+06	2.61986e+06	1.23398e+06	5.77151e+06	3.575e+06	2.67468e+06	2.91725e+06	2.53609e+06	3.78475e+06	4.48482e+06	2.01531e+06	1.50347e+06
DG(8:0_8:0)	DG	M+Na	367.245	1.22271	C19 H36 O5 Na1	1.14733e+07	1.38209e+07	1.17158e+07	1.40662e+07	6.71561e+06	1.16516e+07	7.97695e+06	1.33975e+07	1.33464e+07	9.13462e+06	1.06984e+07	1.05663e+07	1.07499e+07	1.07563e+07	1.05707e+07	1.06923e+07	1.04469e+07
DG(16:0)	DG	M+Na	367.245	1.48017	C19 H36 O5 Na1	747032	92170	1.48768e+06	907208	4.40987e+06	326463	549116	294938	2.45791e+06	384346	2.23934e+06	1.13563e+06	1.80545e+06	1.98194e+06	3.59507e+06	2.99211e+06	2.28062e+06
DG(16:0e)	DG	M+Na	353.266	4.53688	C19 H38 O4 Na1	845179	710328	1.07113e+06	1.47422e+06	894340	1.6855e+06	1.73601e+06	953526	1.88423e+06	1.60119e+06	1.41274e+06	1.05961e+06	1.18404e+06	1.14669e+06	1.14177e+06	1.33729e+06	1.2493e+06
DG(16:1e)	DG	M+Na	351.251	2.099	C19 H36 O4 Na1	9.81918e+06	7.84972e+06	8.50788e+06	8.3406e+06	6.68493e+06	4.01503e+06	5.46226e+06	7.17369e+06	6.35425e+06	3.0674e+06	5.77576e+06	6.1813e+06	5.6346e+06	5.58014e+06	5.89993e+06	9.46971e+06	5.25121e+06
DG(17:1)	DG	M+NH4	374.29	1.22538	C20 H40 O5 N1	4.01597e+06	5.33808e+06	3.86947e+06	4.93188e+06	5.47308e+06	6.62764e+06	3.08841e+06	6.51042e+06	7.3252e+06	5.32539e+06	5.22096e+06	4.47421e+06	5.14606e+06	4.90025e+06	5.20519e+06	4.67094e+06	4.21885e+06
DG(6:0_11:2)	DG	M+NH4	372.274	1.32591	C20 H38 O5 N1	5.18881e+06	6.92328e+06	7.67723e+06	7.93327e+06	4.97709e+06	5.83786e+06	4.36985e+06	1.02823e+07	7.85672e+06	4.52817e+06	6.391e+06	4.78369e+06	5.57357e+06	5.48406e+06	5.0396e+06	6.04758e+06	6.02852e+06
DG(6:0_11:3)	DG	M+H	353.232	1.23103	C20 H33 O5	2.30245e+07	6.12936e+07	7.11891e+07	8.95148e+07	6.69852e+07	2.4625e+07	2.94862e+07	3.20502e+07	5.88013e+07	1.84849e+07	4.59358e+07	3.7674e+07	4.36202e+07	4.27016e+07	4.397e+07	3.69707e+07	4.15253e+07
DG(6:0_11:4)	DG	M+NH4	368.243	1.57549	C20 H34 O5 N1	5.71952e+06	1.07143e+07	9.87655e+06	7.86197e+06	8.26868e+06	5.45048e+06	6.19708e+06	5.65113e+06	8.85956e+06	5.05699e+06	6.63435e+06	7.6079e+06	8.54342e+06	7.76215e+06	7.79757e+06	7.09454e+06	7.46705e+06
DG(18:0e)	DG	M+H	359.316	7.609	C21 H43 O4	1.37485e+06	2.02067e+06	1.43407e+06	1.94312e+06	1.62282e+06	2.27233e+06	2.60739e+06	1.17968e+06	2.09563e+06	2.05897e+06	2.30268e+06	2.24241e+06	2.27898e+06	2.17725e+06	2.05145e+06	2.26785e+06	2.53579e+06
DG(6:0_12:2)	DG	M+H	369.264	1.764	C21 H37 O5	0	44010.8	34350.5	42049.7	4.55996e+06	65101.6	59525.6	45689.8	233441	149179	269027	653529	747079	809364	415117	173755	679908
DG(8:0_10:3)	DG	M+H	367.248	1.4047	C21 H35 O5	476211	8.93545e+06	1.23704e+06	1.13455e+07	8.98239e+06	843697	179194	4.08069e+06	9.7292e+06	983418	1.65308e+06	4.50959e+06	3.23854e+06	5.50055e+06	5.86921e+06	984301	3.33091e+06
DG(8:0_10:4)	DG	M+Na	387.214	24.249	C21 H32 O5 Na1	265471	2.69214e+06	642419	2.92126e+06	542059	1.63968e+06	2.89293e+06	2.88289e+06	137105	944268	825957	1.47005e+06	822730	938516	1.74334e+06	1.15807e+06	222021
DG(8:0_11:2)	DG	M+NH4	400.306	1.24752	C22 H42 O5 N1	2.10856e+06	1.96851e+06	2.20969e+06	1.91012e+06	2.05388e+06	3.16757e+06	1.80081e+06	6.94195e+06	1.91098e+06	2.4568e+06	3.2275e+06	2.93357e+06	3.53656e+06	2.96192e+06	2.72541e+06	3.12878e+06	2.69795e+06
DG(19:2e)	DG	M+NH4	386.326	1.33665	C22 H44 O4 N1	3.57702e+06	4.92991e+06	4.02391e+06	3.82504e+06	4.71929e+06	2.19577e+06	968535	2.87189e+06	3.39246e+06	2.99335e+06	3.48906e+06	3.41751e+06	3.08478e+06	3.22301e+06	3.18401e+06	3.12266e+06	3.47415e+06
DG(8:0_11:3)	DG	M+NH4	398.29	1.48699	C22 H40 O5 N1	1.79453e+06	3.41012e+06	361620	2.57915e+06	541657	101061	566354	2.68197e+06	2.59826e+06	569178	769474	909777	1.5522e+06	1.6178e+06	1.63056e+06	1.07828e+06	1.24523e+06
DG(8:0_11:4)	DG	M+NH4	396.274	1.45448	C22 H38 O5 N1	1.6808e+06	8.7447e+06	7.23241e+06	5.5254e+06	3.06004e+06	2.73851e+06	2.83555e+06	2.28872e+06	7.96133e+06	4.19952e+06	1.98238e+06	776473	3.23792e+06	4.84397e+06	2.94012e+06	2.46713e+06	453773
DG(19:4e)	DG	M+H	365.269	2.049	C22 H37 O4	1.48123e+06	1.51551e+06	1.03019e+06	1.16228e+06	1.50331e+06	1.67856e+06	1.84274e+06	1.53039e+06	2.74435e+06	1.61074e+06	1.67489e+06	1.11576e+06	1.25222e+06	1.81807e+06	1.39319e+06	1.29719e+06	750941
DG(19:5e)	DG	M+NH4	380.28	1.93299	C22 H38 O4 N1	1.15445e+07	1.52689e+07	1.36686e+07	1.15264e+07	6.59239e+06	5.02177e+06	1.18206e+07	7.40719e+06	1.29618e+07	8.27541e+06	9.34823e+06	1.14386e+07	9.34619e+06	9.4449e+06	9.33876e+06	8.32944e+06	9.19745e+06
DG(20:0e)	DG	M+Na	409.329	17.8505	C23 H46 O4 Na1	0	1.77941e+06	2.40578e+07	2.07412e+07	9.38812e+06	0	0	0	2.08592e+06	0	3.68386e+06	4.33774e+06	3.1852e+06	1.60068e+06	4.29927e+06	2.75821e+06	4.55498e+06
DG(20:1e)	DG	M+Na	407.313	17.0182	C23 H44 O4 Na1	0	2.48812e+06	1.96867e+07	1.75941e+07	7.65819e+06	0	0	133894	4.20435e+06	0	4.16351e+06	4.27031e+06	4.06824e+06	3.94236e+06	4.26986e+06	4.01796e+06	4.63951e+06
DG(20:3)	DG	M+NH4	412.306	1.583	C23 H42 O5 N1	112204	150158	186330	756809	403113	82713.9	0	3.57153e+06	315226	0	118511	0	471163	335185	44258.6	214843	250120
DG(20:4)	DG	M+NH4	410.29	1.39865	C23 H40 O5 N1	2.1608e+06	1.78937e+06	1.22353e+06	1.04021e+06	509706	0.59	162401	6.83758e+06	145972	142968	1.34148e+06	1.2933e+06	1.13202e+06	1.20926e+06	1.24392e+06	1.38462e+06	1.64367e+06
DG(20:5e)	DG	M+Na	399.251	17.166	C23 H36 O4 Na1	8.82826e+06	9.19439e+06	8.08775e+06	7.55198e+06	7.5983e+06	1.57935e+07	1.8246e+07	1.20012e+07	1.23902e+07	1.10389e+07	1.08413e+07	9.42266e+06	1.0335e+07	1.03958e+07	9.89542e+06	1.04664e+07	1.02518e+07
DG(21:4)	DG	M+Na	429.261	1.21347	C24 H38 O5 Na1	7.29081e+06	8.2899e+06	7.19237e+06	1.79869e+07	4.12352e+06	4.4823e+06	7.1335e+06	7.15594e+06	5.73802e+06	5.60332e+06	6.80924e+06	6.68621e+06	6.3512e+06	6.98614e+06	6.99789e+06	6.307e+06	6.37107e+06
DG(4:0_18:2)	DG	M+NH4	442.353	6.621	C25 H48 O5 N1	2.95722e+06	5.45769e+06	2.73638e+06	2.21124e+06	1.51577e+06	2.15136e+06	3.1311e+06	2.60386e+06	3.18995e+06	2.39323e+06	2.24716e+06	2.59979e+06	2.0277e+06	2.84356e+06	2.45967e+06	2.59617e+06	2.39515e+06
DG(22:4e)	DG	M+H	407.316	17.0149	C25 H43 O4	0	2.70883e+06	2.13504e+07	1.89936e+07	8.1763e+06	0	0	135471	4.46627e+06	0	4.51666e+06	4.3888e+06	4.15407e+06	4.09462e+06	4.36464e+06	4.18655e+06	4.72851e+06
DG(24:2e)	DG	M+NH4	456.405	8.745	C27 H54 O4 N1	1.01229e+06	2.55932e+06	1.63178e+06	5.19258e+06	1.21646e+06	631123	3.36811e+06	804739	2.20625e+06	1.51947e+06	2.23003e+06	2.19202e+06	1.72161e+06	1.77412e+06	1.78221e+06	1.87361e+06	1.88636e+06
DG(24:4e)	DG	M+H	435.347	8.51	C27 H47 O4	1.46043e+06	1.48132e+06	1.56541e+06	1.91946e+06	1.8385e+06	1.7279e+06	2.22586e+06	1.29597e+06	3.2887e+06	1.42118e+06	1.49818e+06	1.36461e+06	1.4111e+06	1.54378e+06	1.60507e+06	1.50575e+06	1.65293e+06
DG(26:0e)	DG	M+Na	493.423	19.682	C29 H58 O4 Na1	0	0	4.98612e+06	3.44499e+06	1.23312e+06	0	1.06656e+06	0	1.00471e+06	608598	1.26863e+06	0	0	0	591094	2.00268e+06	458561
DG(26:1e)	DG	M+Na	491.407	19.15	C29 H56 O4 Na1	148028	613083	4.891e+06	4.03412e+06	1.54477e+06	2.27921e+06	4.35962e+06	609260	5.347e+06	1.00682e+06	2.15868e+06	2.23801e+06	2.26792e+06	2.20784e+06	1.36648e+06	1.59315e+06	1.73627e+06
DG(26:2e)	DG	M+NH4	484.436	5.16163	C29 H58 O4 N1	6.60766e+06	7.14327e+06	7.81874e+06	7.38011e+06	6.53978e+06	7.04947e+06	2.06102e+07	7.92867e+06	7.4287e+06	6.24134e+06	8.9853e+06	9.3991e+06	8.11195e+06	9.19664e+06	8.95002e+06	9.12352e+06	8.34902e+06
DG(26:3e)	DG	M+NH4	482.42	8.84435	C29 H56 O4 N1	2.42474e+06	7.00889e+06	3.81521e+06	2.19452e+06	1.89385e+06	2.28211e+06	5.72203e+06	1.81336e+06	3.08616e+06	3.62705e+06	3.39174e+06	3.41191e+06	2.47855e+06	2.70593e+06	3.1136e+06	3.17046e+06	3.49856e+06
DG(26:4e)	DG	M+H	463.378	9.595	C29 H51 O4	1.00985e+06	1.91795e+06	1.33181e+06	1.34154e+06	1.58696e+06	1.06365e+06	1.14502e+06	1.03735e+06	2.13387e+06	1.04794e+06	1.26717e+06	1.28086e+06	1.2677e+06	1.23452e+06	1.1419e+06	1.02379e+06	1.16358e+06
DG(26:5e)	DG	M+NH4	478.389	8.10135	C29 H52 O4 N1	1.02335e+07	5.82857e+06	1.13407e+07	1.11185e+07	9.49655e+06	1.45387e+07	1.50203e+07	7.62022e+06	1.8816e+07	1.43319e+07	1.26764e+07	1.22477e+07	1.15151e+07	1.17077e+07	1.07492e+07	1.20308e+07	1.19495e+07
DG(26:6e)	DG	M+Na	481.329	18.5181	C29 H46 O4 Na1	7.10633e+06	7.12148e+06	5.84921e+06	8.70612e+06	6.4353e+06	1.28704e+07	1.55796e+07	9.3722e+06	1.28961e+07	1.15229e+07	1.11622e+07	8.77285e+06	9.58389e+06	9.04803e+06	9.70134e+06	1.03475e+07	1.06006e+07
DG(28:0e)	DG	M+Na	521.454	19.717	C31 H62 O4 Na1	0	3.77512e+06	2.03724e+07	1.11241e+07	9.60882e+06	8.5618e+06	5.00849e+06	1.82017e+06	1.68571e+07	5.8423e+06	8.99539e+06	4.80506e+06	5.27308e+06	8.7913e+06	3.57338e+06	8.29203e+06	5.15345e+06
DG(28:1e)	DG	M+Na	519.438	19.713	C31 H60 O4 Na1	0	1.28149e+06	9.76191e+06	4.83224e+06	2.9748e+06	2.23725e+06	9.27282e+06	0	8.31075e+06	2.22355e+06	2.23391e+06	4.02994e+06	2.16089e+06	4.77005e+06	4.17062e+06	4.26953e+06	982542
DG(28:2e)	DG	M+H	495.441	19.7339	C31 H59 O4	1.633	583037	1.58797e+07	5.09502e+06	2.6764e+06	2.49466e+06	2.97984e+06	0	5.03901e+06	1.42417e+06	2.14043e+06	2.67811e+06	2.84273e+06	1.56831e+06	2.63626e+06	2.22498e+06	2.73327e+06
DG(28:3e)	DG	M+Na	515.407	9.646	C31 H56 O4 Na1	195138	1.46888e+06	1.04139e+06	650570	63701.1	56903.3	1.16436e+06	0	3.26696e+06	424769	471962	649182	696233	528535	521899	543416	431784
DG(16:0_14:0)	DG	M+Na	563.465	15.0579	C33 H64 O5 Na1	542486	433409	7.90696e+06	7.40066e+06	1.41214e+07	8.74568e+06	5.26502e+06	888794	5.22001e+06	4.44175e+06	3.99483e+06	4.203e+06	6.05823e+06	4.94777e+06	3.93653e+06	6.32355e+06	4.23498e+06
DG(30:0e)	DG	M+Na	549.485	20.588	C33 H66 O4 Na1	1.9723e+07	5.3265e+07	1.11703e+08	9.48357e+07	7.02208e+07	5.90934e+07	5.7261e+07	3.12176e+07	7.39731e+07	6.01188e+07	6.13299e+07	5.97913e+07	5.3703e+07	5.40642e+07	5.37713e+07	6.23051e+07	5.47893e+07
DG(30:1e)	DG	M+Na	547.47	19.7619	C33 H64 O4 Na1	1.08164e+07	2.34587e+07	5.30007e+07	4.01516e+07	3.14495e+07	5.05e+07	4.56645e+07	1.76511e+07	5.24668e+07	4.09025e+07	3.97531e+07	3.38204e+07	3.43029e+07	3.13892e+07	3.91477e+07	3.48775e+07	3.7573e+07
DG(12:0_18:2)	DG	M+NH4	554.478	12.4634	C33 H64 O5 N1	2.61375e+06	1.8514e+06	8.43754e+06	5.53112e+06	1.25726e+07	3.54699e+07	2.58238e+07	3.34284e+06	3.99014e+07	1.01895e+07	1.09286e+07	1.09869e+07	1.04139e+07	1.0666e+07	1.0535e+07	1.15396e+07	1.19148e+07
DG(30:2e)	DG	M+Na	545.454	19.259	C33 H62 O4 Na1	0	796593	3.31347e+06	2.41739e+06	1.7674e+06	7.51696e+06	8.33038e+06	688952	5.35044e+06	1.94918e+06	1.16189e+06	2.6989e+06	2.42197e+06	2.31108e+06	1.78886e+06	2.62763e+06	2.54914e+06
DG(30:3e)	DG	M+H	521.456	20.16	C33 H61 O4	0	4.60925e+06	2.15991e+07	1.5395e+07	1.03326e+07	4.04762e+06	5.62307e+06	1.10325e+06	6.00731e+06	1.92957e+06	2.15305e+06	6.94883e+06	3.85197e+06	4.44404e+06	3.97514e+06	3.76835e+06	7.70879e+06
DG(30:4)	DG	M+NH4	550.447	9.64556	C33 H60 O5 N1	1.26097e+06	7.96136e+06	6.10843e+06	4.09397e+06	1.01563e+06	806140	6.69672e+06	503634	1.76334e+07	2.42695e+06	3.54577e+06	3.66442e+06	3.71978e+06	3.30613e+06	3.72072e+06	3.40229e+06	3.85049e+06
DG(30:8e)	DG	M+NH4	528.405	6.35341	C33 H54 O4 N1	1.90074e+06	3.4155e+06	2.54053e+06	2.05687e+06	2.10597e+06	1.35041e+06	4.8857e+06	1.69886e+06	2.85329e+06	2.34229e+06	2.14776e+06	2.44981e+06	2.30057e+06	2.4858e+06	2.16084e+06	2.32536e+06	2.58969e+06
DG(31:0e)	DG	M+Na	563.501	20.8246	C34 H68 O4 Na1	7.19036e+06	1.29427e+07	2.56458e+07	2.49714e+07	1.87807e+07	2.97886e+07	1.9506e+07	1.04276e+07	3.48088e+07	3.59081e+07	1.95773e+07	2.19227e+07	2.26026e+07	1.88302e+07	1.86937e+07	2.02937e+07	1.96614e+07
DG(31:1e)	DG	M+Na	561.485	20.4362	C34 H66 O4 Na1	3.92332e+06	3.87402e+06	1.2685e+07	8.51829e+06	6.14406e+06	1.45673e+07	1.15555e+07	5.00387e+06	1.41814e+07	1.05934e+07	8.66944e+06	7.76274e+06	6.54025e+06	9.76729e+06	8.38041e+06	9.09838e+06	6.74619e+06
DG(31:2e)	DG	M+H	537.488	20.832	C34 H65 O4	310102	2.56851e+06	10430223	7.95244e+06	6.70601e+06	3.48587e+06	5.68156e+06	1.29761e+06	2.40975e+06	2.6926e+06	4.21036e+06	3.7249e+06	3.35642e+06	4.29814e+06	3.33916e+06	2.4419e+06	3.14622e+06
DG(31:3e)	DG	M+Na	557.454	10.5745	C34 H62 O4 Na1	4.78464e+07	5.54349e+07	3.7386e+07	3.38308e+07	2.26943e+07	4.4111e+07	4.73147e+07	4.94122e+07	5.09485e+07	3.7683e+07	3.99273e+07	3.95244e+07	4.16228e+07	3.8426e+07	3.97798e+07	3.8181e+07	3.96328e+07
DG(31:4e)	DG	M+Na	555.438	11.493	C34 H60 O4 Na1	2.93481e+06	3.64406e+06	2.99839e+06	343230	413471	1.2656e+06	920477	3.16819e+06	2.60614e+06	1.46963e+06	326471	1.43208e+06	1.19315e+06	791583	569647	711756	1.34214e+06
DG(16:0_16:0)	DG	M+NH4	586.541	16.3592	C35 H72 O5 N1	2.59423e+07	2.73815e+07	4.79275e+07	5.6506e+07	5.70823e+07	9.78109e+07	6.95614e+07	3.87208e+07	8.63837e+07	5.44987e+07	5.22434e+07	4.74278e+07	4.97108e+07	4.73917e+07	5.18454e+07	4.71179e+07	4.76526e+07
DG(32:0e)	DG	M+Na	577.517	21.0396	C35 H70 O4 Na1	2.9449e+08	3.64346e+08	5.37149e+08	4.76208e+08	4.38487e+08	6.08935e+08	5.31052e+08	3.86914e+08	6.15342e+08	5.93198e+08	4.93663e+08	4.91014e+08	4.75844e+08	4.79078e+08	4.92662e+08	4.93258e+08	4.72422e+08
DG(16:0_16:1)	DG	M+NH4	584.525	15.1026	C35 H70 O5 N1	3.95396e+07	4.17585e+07	1.01921e+08	1.30906e+08	1.53171e+08	2.45726e+08	1.21515e+08	5.95261e+07	2.26313e+08	1.10718e+08	1.04954e+08	1.22307e+08	1.06476e+08	1.09014e+08	1.04428e+08	1.02457e+08	1.02e+08
DG(32:1e)	DG	M+Na	575.501	15.2945	C35 H68 O4 Na1	2.29465e+08	1.86127e+08	2.44508e+08	3.16548e+08	4.13211e+08	1.05818e+09	5.95336e+08	2.77364e+08	6.8029e+08	4.91347e+08	4.00296e+08	3.96356e+08	3.94744e+08	4.01199e+08	3.87574e+08	3.72189e+08	3.96604e+08
DG(16:1_16:1)	DG	M+NH4	582.509	13.9231	C35 H68 O5 N1	4.66449e+07	4.69753e+07	1.01642e+08	1.02853e+08	1.76768e+08	3.42815e+08	2.06543e+08	6.34593e+07	3.25246e+08	1.39685e+08	1.27517e+08	1.24138e+08	1.22864e+08	1.21247e+08	1.28745e+08	1.27673e+08	1.24181e+08
DG(18:2_14:1)	DG	M+NH4	580.494	12.8755	C35 H66 O5 N1	0	0	1.33894e+06	1.13546e+06	6.25789e+06	2.08011e+07	1.35773e+07	0	2.13101e+07	3.52614e+06	2.75904e+06	3.03427e+06	3.33595e+06	5.44001e+06	4.58322e+06	5.90463e+06	3.57149e+06
DG(32:3)	DG	M+Na	585.449	18.139	C35 H62 O5 Na1	0	330693	149097	0	80692.4	543737	0	0	0	0	3.84907e+06	0	0	0	137728	0	246941
DG(32:3e)	DG	M+H	549.488	20.5897	C35 H65 O4	1.9723e+07	5.3265e+07	1.11703e+08	9.48357e+07	7.02208e+07	5.90934e+07	5.7261e+07	3.12176e+07	7.39731e+07	6.01188e+07	6.13299e+07	5.97913e+07	5.3703e+07	5.40642e+07	5.37713e+07	6.23051e+07	5.47893e+07
DG(18:2_14:2)	DG	M+NH4	578.478	11.4909	C35 H64 O5 N1	1.28974e+06	1.2946e+06	1.39513e+06	2.07632e+06	2.16393e+06	3.09489e+06	1.04281e+07	448871	9.25536e+06	1.43558e+06	2.57194e+06	2.40164e+06	3.01633e+06	1.92081e+06	2.39497e+06	2.62551e+06	3.13307e+06
DG(10:0_22:6)	DG	M+Na	579.402	10.157	C35 H56 O5 Na1	266682	0	42453.6	463137	405345	3.17447e+06	2.22562e+06	323194	2.23225e+06	670849	762025	575052	694976	573224	702992	717190	606536
DG(33:0e)	DG	M+Na	591.532	21.177	C36 H72 O4 Na1	6.2013e+06	9.44777e+06	2.87203e+07	2.43827e+07	1.80676e+07	2.59254e+07	2.44127e+07	1.21577e+07	3.30024e+07	2.94205e+07	1.92593e+07	1.83664e+07	2.02376e+07	1.92918e+07	2.12059e+07	1.80168e+07	1.91997e+07
DG(15:0_18:1)	DG	M+Na	603.496	15.7584	C36 H68 O5 Na1	9.86388e+06	9.21186e+06	1.36226e+07	1.75026e+07	2.37085e+07	2.93918e+07	1.53551e+07	7.91977e+06	2.41645e+07	2.33058e+07	1.68399e+07	1.66018e+07	1.64699e+07	1.69909e+07	1.7048e+07	1.65481e+07	1.72511e+07
DG(33:1e)	DG	M+Na	589.517	20.8306	C36 H70 O4 Na1	1.16642e+07	1.60951e+07	3.22414e+07	2.95973e+07	2.4062e+07	4.01474e+07	3.7136e+07	1.46247e+07	4.52444e+07	3.50147e+07	2.59379e+07	2.62574e+07	2.99475e+07	2.73219e+07	2.50927e+07	2.54774e+07	2.98589e+07
DG(15:0_18:2)	DG	M+NH4	596.525	14.6319	C36 H70 O5 N1	1.64672e+07	1.52237e+07	1.85939e+07	2.13333e+07	2.64844e+07	5.10755e+07	3.33516e+07	1.58448e+07	5.38319e+07	3.34039e+07	2.56681e+07	2.74837e+07	2.62871e+07	3.15858e+07	2.54238e+07	2.71112e+07	2.69597e+07
DG(33:2e)	DG	M+Na	587.501	20.4359	C36 H68 O4 Na1	4.66238e+06	7.72441e+06	1.01657e+07	6.42417e+06	8.34771e+06	1.45955e+07	8.4368e+06	5.02394e+06	1.03051e+07	1.14572e+07	6.44694e+06	1.11096e+07	1.04214e+07	8.45926e+06	8.60412e+06	8.35282e+06	1.20616e+07
DG(33:3e)	DG	M+H	563.503	20.809	C36 H67 O4	7.19036e+06	1.29427e+07	2.56458e+07	2.49714e+07	1.87807e+07	2.97886e+07	1.9506e+07	1.04276e+07	3.48088e+07	3.59081e+07	1.95773e+07	2.19227e+07	2.26026e+07	1.88302e+07	1.86937e+07	2.02937e+07	1.96614e+07
DG(33:4)	DG	M+Na	597.449	12.081	C36 H62 O5 Na1	9.10078e+06	1.49836e+07	1.64715e+07	5.37054e+06	4.89152e+06	5.74651e+06	1.48561e+07	2.27183e+06	2.7631e+07	1.0119e+07	9.99898e+06	1.02157e+07	9.15841e+06	1.04533e+07	9.88406e+06	1.01732e+07	1.02602e+07
DG(33:5)	DG	M+H	573.451	10.1231	C36 H61 O5	5.55416e+06	8.03268e+06	7.90128e+06	6.7417e+06	3.89673e+06	6.39709e+06	6.71119e+06	1.01659e+07	1.24588e+07	4.80562e+06	1.06239e+07	4.43789e+06	4.4893e+06	8.72348e+06	4156000	4.11821e+06	4.0532e+06
DG(18:0_16:0)	DG	M+NH4	614.572	17.4803	C37 H76 O5 N1	1.34267e+07	1.28556e+07	2.04109e+07	2.35917e+07	2.78866e+07	4.19127e+07	3.13048e+07	2.21653e+07	3.80057e+07	1.99944e+07	2.13767e+07	2.19283e+07	2.09244e+07	2.07441e+07	2.05169e+07	1.79574e+07	2.24515e+07
DG(34:0e)	DG	M+Na	605.548	21.368	C37 H74 O4 Na1	4.78833e+07	8.87534e+07	2.09588e+08	1.93425e+08	1.57081e+08	1.55273e+08	1.42484e+08	9.2307e+07	1.5993e+08	1.22564e+08	1.2609e+08	1.2757e+08	1.21537e+08	1.27871e+08	1.37011e+08	1.20947e+08	1.22913e+08
DG(16:0_18:1)	DG	M+H	595.53	16.384	C37 H71 O5	2.1413e+07	2.11005e+07	3.11984e+07	4.47373e+07	4.21972e+07	8.41918e+07	4.70585e+07	3.32475e+07	6.6942e+07	4.4421e+07	3.86096e+07	3.63916e+07	3.81939e+07	3.68288e+07	3.71998e+07	3.85024e+07	3.73717e+07
DG(34:1e)	DG	M+Na	603.532	20.9902	C37 H72 O4 Na1	1.87917e+08	2.37325e+08	3.70049e+08	3.40483e+08	2.8634e+08	4.48219e+08	3.61994e+08	2.59067e+08	3.88856e+08	3.88238e+08	3.2929e+08	3.25023e+08	3.33194e+08	3.16342e+08	3.2554e+08	3.18851e+08	3.21326e+08
DG(16:1_18:1)	DG	M+Na	615.496	13.2119	C37 H68 O5 Na1	6.07693e+06	3.99297e+06	6.32341e+06	5.21863e+06	1.89828e+07	4.47293e+07	2.57663e+07	3.99069e+06	3.51605e+07	2.13791e+07	1.86831e+07	1.91196e+07	1.67818e+07	1.60787e+07	1.77071e+07	1.43062e+07	1.84859e+07
DG(16:0_18:2)	DG	M+NH4	610.541	15.3085	C37 H72 O5 N1	2.82273e+09	2.35485e+09	2.82997e+09	3.5375e+09	4.11442e+09	8.50958e+09	6.05743e+09	3.80241e+09	7.0068e+09	4.87647e+09	4.27512e+09	4.13616e+09	4.22128e+09	4.09657e+09	4.00829e+09	3.99211e+09	4.13629e+09
DG(34:2)	DG	M+NH4	610.541	26.106	C37 H72 O5 N1	1.86384e+06	916856	1.46909e+06	2.79783e+06	1.25249e+06	2.88874e+06	7.30279e+06	2.84546e+06	1.40496e+06	607806	2.11139e+06	7.18559e+06	567301	1.26606e+06	1.95056e+07	1.88849e+07	9.22012e+06
DG(34:2e)	DG	M+Na	601.517	13.4501	C37 H70 O4 Na1	8.27695e+07	9.19982e+07	8.59067e+07	8.57596e+07	6.35553e+07	9.27531e+07	9.19415e+07	1.10792e+08	8.93063e+07	6.23341e+07	8.14576e+07	8.09235e+07	8.04541e+07	7.85698e+07	7.78356e+07	8.02351e+07	7.76722e+07
DG(16:1_18:2)	DG	M+NH4	608.525	13.9995	C37 H70 O5 N1	1.07039e+08	1.17784e+08	1.69192e+08	2.0532e+08	3.28268e+08	8.09913e+08	3.39741e+08	1.58382e+08	6.82166e+08	4.07114e+08	3.0592e+08	2.9239e+08	3.15216e+08	2.88549e+08	2.80294e+08	2.83818e+08	2.85387e+08
DG(16:0_18:3)	DG	M+NH4	608.525	14.56	C37 H70 O5 N1	2.64603e+07	1.9983e+07	2.65041e+07	3.50336e+07	4.16611e+07	6.78212e+07	5.09894e+07	2.15723e+07	5.6825e+07	3.6699e+07	3.80347e+07	3.47791e+07	3.52399e+07	3.48552e+07	3.59373e+07	3.94898e+07	3.18717e+07
DG(34:3e)	DG	M+Na	599.501	19.3124	C37 H68 O4 Na1	6.0869e+08	6.71605e+08	4.74817e+08	4.52747e+08	4.56569e+08	4.84644e+08	4.09693e+08	6.68798e+08	3.87488e+08	4.73997e+08	5.5494e+08	5.60833e+08	5.39913e+08	5.299e+08	5.4595e+08	5.56245e+08	5.53159e+08
DG(16:1_18:3)	DG	M+NH4	606.509	12.8906	C37 H68 O5 N1	0	494493	501738	0	1.09921e+07	3.03933e+07	1.14211e+07	520395	1.16685e+07	4.52485e+06	3.34211e+06	3.34271e+06	7.25347e+06	2.03938e+06	6.94615e+06	1.73451e+06	3.48115e+06
DG(14:0_20:4)	DG	M+NH4	606.509	13.5784	C37 H68 O5 N1	8.2542e+06	9.03144e+06	1.00486e+07	1.32552e+07	1.86074e+07	5.75958e+07	2.92885e+07	1.28792e+07	4.96798e+07	2.26056e+07	1.90997e+07	1.7859e+07	2.19407e+07	2.15245e+07	1.84565e+07	1.66821e+07	1.89724e+07
DG(34:4e)	DG	M+H	575.503	12.0455	C37 H67 O4	1.71758e+08	2.53836e+08	1.96243e+08	2.5973e+08	1.74732e+08	2.46825e+08	2.55559e+08	2.41008e+08	2.73729e+08	2.30193e+08	2.14945e+08	2.07092e+08	2.15243e+08	2.17029e+08	2.05911e+08	2.01374e+08	2.22775e+08
DG(34:5e)	DG	M+H	573.488	19.6633	C37 H65 O4	1.00774e+07	1.40657e+07	1.08853e+07	1.41235e+07	1.35731e+07	1.73286e+07	2.00075e+06	1.87473e+07	1.41497e+07	1.31017e+07	1.73773e+07	1.75173e+07	1.4469e+07	1.51018e+07	1.63882e+07	1.95429e+07	1.15171e+07
DG(34:6)	DG	M+NH4	602.478	11.43	C37 H64 O5 N1	1.15117e+06	719318	259478	299684	2.35259e+06	2.0085e+07	8.28511e+06	313031	1.70725e+07	2.06353e+06	2.51179e+06	2.03904e+06	3.99078e+06	1.78884e+06	2.58744e+06	2.51254e+06	3.36154e+06
DG(35:1e)	DG	M+Na	617.548	21.1993	C38 H74 O4 Na1	3.0664e+06	4.04125e+06	1.34418e+07	1.01892e+07	8.25466e+06	1.33494e+07	1.22543e+07	5.02638e+06	1.42996e+07	1.34546e+07	8.73294e+06	7.72206e+06	9.57518e+06	8.12598e+06	8.02664e+06	8.20407e+06	9.42242e+06
DG(17:0_18:2)	DG	M+Na	629.512	15.8025	C38 H70 O5 Na1	1.37617e+07	1.45862e+07	2.2193e+07	2.39089e+07	4.68802e+07	5.20488e+07	2.43538e+07	1.37055e+07	4.13156e+07	4.02395e+07	2.65317e+07	2.70727e+07	2.57775e+07	2.66337e+07	6.83687e+07	3.24285e+07	2.99626e+07
DG(35:2e)	DG	M+Na	615.532	20.8371	C38 H72 O4 Na1	1.97313e+06	2.16386e+06	5.77755e+06	3.0516e+06	2.74859e+06	8.4902e+06	4.42606e+06	3.71824e+06	6.51574e+06	6.19223e+06	3.3383e+06	5.48637e+06	3.21911e+06	3.10723e+06	4.60453e+06	5.16903e+06	4.92121e+06
DG(17:1_18:2)	DG	M+NH4	622.541	14.7133	C38 H72 O5 N1	2.65215e+07	2.36603e+07	2.62919e+07	2.95738e+07	5.2312e+07	8.51469e+07	4.7798e+07	2.10668e+07	7.50194e+07	5.14711e+07	4.59402e+07	3.98805e+07	4.10424e+07	4.06383e+07	3.94079e+07	3.68899e+07	4.21229e+07
DG(35:3e)	DG	M+Na	613.517	13.8069	C38 H70 O4 Na1	7.14937e+06	7.57189e+06	7.05981e+06	8.81674e+06	5.46642e+06	1.32758e+07	1.05049e+07	9.99986e+06	9.33539e+06	6.05743e+06	7.65028e+06	7.89067e+06	7.41572e+06	7.03828e+06	6.78349e+06	9.14283e+06	8.0089e+06
DG(35:4)	DG	M+NH4	620.525	12.091	C38 H70 O5 N1	2.35627e+06	3.17769e+06	3.11767e+06	949951	2.29657e+06	1.04837e+06	3.17831e+06	575545	3.5325e+06	1.59752e+06	2.47424e+06	2.0745e+06	1.53073e+06	2.47156e+06	1.55605e+06	1.67271e+06	1.81224e+06
DG(17:1_18:3)	DG	M+NH4	620.525	13.5801	C38 H70 O5 N1	1.03102e+06	316139	621158	534440	4.92163e+06	1.19021e+07	4.07029e+06	487563	7.45977e+06	3.43007e+06	2.68807e+06	3.75403e+06	1.39505e+06	1.91995e+06	2.52186e+06	2.21895e+06	2.26965e+06
DG(18:0_18:0)	DG	M+NH4	642.603	18.3591	C39 H80 O5 N1	5.16849e+06	5.89002e+06	6.95965e+06	6.43282e+06	9.93258e+06	1.28424e+07	1.06813e+07	6.20865e+06	1.30085e+07	8.54026e+06	8.83203e+06	8.58819e+06	7.95354e+06	8.47409e+06	7.37823e+06	7.31617e+06	8.71209e+06
DG(36:0e)	DG	M+Na	633.579	21.669	C39 H78 O4 Na1	1.05479e+07	1.44072e+07	2.61246e+07	2.5489e+07	1.87269e+07	2.62392e+07	2.13207e+07	1.70773e+07	3.98075e+07	3.14063e+07	2.33261e+07	2.26069e+07	2.22192e+07	2.01237e+07	2.19692e+07	2.24904e+07	2.14865e+07
DG(18:0_18:1)	DG	M+NH4	640.587	17.5078	C39 H78 O5 N1	7.78133e+07	8.73178e+07	1.52468e+08	1.9249e+08	2.37891e+08	3.13885e+08	2.08009e+08	1.37205e+08	2.5599e+08	1.48394e+08	1.61721e+08	1.62555e+08	1.5102e+08	1.40104e+08	1.4681e+08	1.40179e+08	1.46253e+08
DG(36:1e)	DG	M+Na	631.564	21.395	C39 H76 O4 Na1	4.83777e+07	3.52425e+07	5.46246e+07	4.97507e+07	5.48508e+07	6.20781e+07	7.32681e+07	6.18993e+07	8.70972e+07	6.6235e+07	4.50537e+07	6.86766e+07	6.08894e+07	7.5505e+07	7.07984e+07	6.69347e+07	4.30368e+07
DG(18:1_18:1)	DG	M+Na	643.527	15.009	C39 H72 O5 Na1	3.29225e+07	3.33241e+07	3.32296e+07	4.35887e+07	3.93206e+07	9.72419e+07	5.51454e+07	4.82855e+07	6.95063e+07	5.28687e+07	4.61014e+07	4.61585e+07	4.56127e+07	4.55321e+07	4.36437e+07	4.49047e+07	4.46559e+07
DG(18:0_18:2)	DG	M+NH4	638.572	15.3528	C39 H76 O5 N1	2.35757e+08	1.9782e+08	2.58494e+08	2.91091e+08	5.06651e+08	8.64458e+08	5.16311e+08	2.6459e+08	6.23967e+08	4.92465e+08	3.87984e+08	3.92993e+08	3.82403e+08	3.73632e+08	3.58374e+08	3.80214e+08	3.76911e+08
DG(36:2e)	DG	M+Na	629.548	16.5349	C39 H74 O4 Na1	1.02674e+07	9.50598e+06	1.23385e+07	1.33717e+07	2.23523e+07	4.1053e+07	2.27731e+07	1.25032e+07	3.41023e+07	2.46969e+07	1.6363e+07	1.77421e+07	1.63844e+07	1.82373e+07	1.72056e+07	1.63564e+07	1.72592e+07
DG(18:1_18:2)	DG	M+Na	641.512	15.3495	C39 H70 O5 Na1	4.86126e+08	3.96588e+08	4.99788e+08	4.86482e+08	1.04202e+09	1.24832e+09	7.72175e+08	4.60832e+08	9.09196e+08	8.73634e+08	7.39721e+08	7.35194e+08	7.46705e+08	7.26636e+08	7.06203e+08	7.24039e+08	7.17056e+08
DG(16:0_20:3)	DG	M+NH4	636.556	15.608	C39 H74 O5 N1	1.54362e+08	1.56184e+08	1.4727e+08	2.21624e+08	1.66779e+08	3.94139e+08	2.15545e+08	2.40149e+08	3.36085e+08	2.62909e+08	2.15049e+08	2.06933e+08	2.16431e+08	2.27859e+08	2.20325e+08	1.74549e+08	2.09543e+08
DG(36:3e)	DG	M+H	605.55	21.3785	C39 H73 O4	4.74261e+07	9.25972e+07	2.10503e+08	1.8154e+08	1.49969e+08	1.57816e+08	1.42465e+08	9.03848e+07	1.59316e+08	1.22499e+08	1.28719e+08	1.28268e+08	1.22224e+08	1.29766e+08	1.28418e+08	1.239e+08	1.21732e+08
DG(18:1_18:3)	DG	M+H	617.514	11.0846	C39 H69 O5	1.23294e+06	2.65919e+06	2.65679e+06	2.5763e+06	2.5787e+07	7.61233e+06	3.12052e+06	1.34889e+06	7.28636e+06	3.03093e+06	4.62198e+06	5.2466e+06	4.86243e+06	3.91459e+06	4.61048e+06	4.84513e+06	5.3183e+06
DG(18:2_18:2)	DG	M+Na	639.496	14.2515	C39 H68 O5 Na1	1.02653e+08	5.81365e+07	9.26784e+07	6.00413e+07	3.71657e+08	3.36956e+08	1.76706e+08	5.2188e+07	2.41783e+08	2.57803e+08	1.72858e+08	1.63264e+08	1.72752e+08	1.63117e+08	1.68069e+08	1.66228e+08	1.70606e+08
DG(16:0_20:4)	DG	M+Na	639.496	14.9923	C39 H68 O5 Na1	5.423e+08	5.07089e+08	5.37423e+08	5.14455e+08	5.05847e+08	5.91303e+08	4.92658e+08	5.63863e+08	5.09606e+08	6.4297e+08	5.42872e+08	5.37858e+08	5.71962e+08	5.30405e+08	5.3213e+08	5.5677e+08	5.48416e+08
DG(36:4e)	DG	M+H	603.535	16.4148	C39 H71 O4	1.05857e+08	1.06802e+08	1.50834e+08	2.04495e+08	3.14651e+08	5.23786e+08	2.73861e+08	1.5659e+08	3.42463e+08	2.70489e+08	2.16561e+08	2.10203e+08	2.1058e+08	2.05859e+08	1.98959e+08	2.0743e+08	2.07193e+08
DG(18:3_18:2)	DG	M+NH4	632.525	13.2201	C39 H70 O5 N1	1.61376e+08	1.23961e+08	1.42782e+08	1.50964e+08	3.41704e+08	7.87859e+08	4.86302e+08	1.42161e+08	5.9815e+08	3.49981e+08	3.07387e+08	2.99475e+08	2.9768e+08	3.11309e+08	2.9518e+08	2.78401e+08	2.94113e+08
DG(18:4_18:1)	DG	M+NH4	632.525	13.6192	C39 H70 O5 N1	4.76694e+07	6.2899e+07	6.5375e+07	7.00803e+07	7.43764e+07	1.61399e+08	7.58855e+07	5.49635e+07	1.98494e+08	7.77273e+07	2.0671e+08	7.3377e+07	6.4148e+07	6.50038e+07	7.15771e+07	6.99408e+07	6.8575e+07
DG(16:0_20:5)	DG	M+NH4	632.525	13.9877	C39 H70 O5 N1	7.94617e+06	1.42316e+07	1.10428e+07	1.15999e+07	6.8931e+06	4.52162e+07	2.01585e+07	2.24289e+07	3.04466e+07	1.39874e+07	1.35621e+07	1.41416e+07	1.97991e+07	1.3993e+07	1.31693e+07	1.69063e+07	9.26869e+06
DG(36:5)	DG	M+H	615.498	15.4434	C39 H67 O5	1.20265e+09	1.00378e+09	1.16661e+09	1.53871e+09	1.95353e+09	2.65044e+09	1.70227e+09	1.2209e+09	1.7925e+09	1.53924e+09	1.44776e+09	1.44791e+09	1.52897e+09	1.81274e+09	1.44165e+09	1.44952e+09	1.79151e+09
DG(36:5e)	DG	M+H	601.519	13.439	C39 H69 O4	8.27695e+07	9.19982e+07	8.59067e+07	8.57596e+07	6.35553e+07	9.27531e+07	9.19415e+07	1.10792e+08	8.93063e+07	6.23341e+07	8.14576e+07	8.09235e+07	8.04541e+07	7.85698e+07	7.78356e+07	8.02351e+07	7.76722e+07
DG(18:3_18:3)	DG	M+NH4	630.509	12.396	C39 H68 O5 N1	2.97404e+07	1.64456e+07	1.2845e+07	1.63728e+07	5.66545e+07	2.27487e+08	1.26525e+08	1.74054e+07	1.77409e+08	5.93634e+07	7.1392e+07	6.22425e+07	5.94882e+07	6.3148e+07	6.54552e+07	6.40844e+07	5.74284e+07
DG(14:0_22:6)	DG	M+NH4	630.509	13.121	C39 H68 O5 N1	952485	828990	1.54798e+06	780116	4.95472e+06	1.50611e+07	1.5481e+07	686189	1.34528e+07	7.28956e+06	5.29341e+06	4.29858e+06	5.46909e+06	4.40674e+06	4.7217e+06	4.55351e+06	5.97747e+06
DG(36:6e)	DG	M+H	599.503	20.268	C39 H67 O4	1.01857e+08	1.22859e+08	1.33887e+08	1.11715e+08	1.26836e+08	2.03636e+08	1.98894e+08	1.08806e+08	1.90103e+08	1.90562e+08	1.58367e+08	1.41058e+08	1.51604e+08	1.43059e+08	1.39044e+08	1.42008e+08	1.59747e+08
DG(22:6_14:1)	DG	M+NH4	628.494	12.0758	C39 H66 O5 N1	482419	280193	228150	0	2.47629e+06	1.78701e+07	1.04844e+07	1.07062e+06	1.30194e+07	5.6469e+06	2.88221e+06	3.68493e+06	3.156e+06	3.0375e+06	3.62665e+06	3.01294e+06	2.27413e+06
DG(36:7e)	DG	M+H	597.488	18.7186	C39 H65 O4	7.12656e+06	9.42861e+06	1.00275e+07	1.08472e+07	8.98725e+06	1.91098e+07	2.22169e+07	1.62408e+07	1.29931e+07	1.49756e+07	1.02369e+07	1.19797e+07	1.29102e+07	9.0879e+06	1.25761e+07	1.65099e+07	1.34568e+07
DG(22:6_14:2)	DG	M+Na	631.433	10.675	C39 H60 O5 Na1	2.85331e+06	2.89273e+06	1.94914e+06	1.89101e+06	1.56098e+06	2.97477e+06	4.61333e+06	2.74292e+06	3.99844e+06	2.302e+06	2.51394e+06	2.53864e+06	2.7135e+06	2.27211e+06	2.76866e+06	2.41491e+06	2.86167e+06
DG(19:1_18:1)	DG	M+NH4	652.587	16.9911	C40 H78 O5 N1	7.78471e+06	8.47858e+06	1.05159e+07	1.3669e+07	1.85603e+07	3.98623e+07	2.1781e+07	1.26206e+07	3.05042e+07	2.17752e+07	1.57091e+07	1.55742e+07	1.5436e+07	1.4734e+07	1.33345e+07	1.38061e+07	1.4066e+07
DG(19:1_18:2)	DG	M+Na	655.527	15.99	C40 H72 O5 Na1	1.29937e+07	9.83388e+06	1.18931e+07	1.24936e+07	3.10509e+07	4.84717e+07	2.27473e+07	1.2216e+07	3.12897e+07	2.90471e+07	2.09414e+07	2.21146e+07	2.32474e+07	2.17264e+07	2.1325e+07	2.12952e+07	2.10771e+07
DG(37:3e)	DG	M+Na	641.548	15.1247	C40 H74 O4 Na1	5.02771e+06	5.00192e+06	3.66202e+06	3.90945e+06	1.95525e+06	5.59307e+06	3.97051e+06	4.47607e+06	3.2634e+06	1.42214e+06	4.7688e+06	3.74981e+06	4.26377e+06	4.04365e+06	4.71917e+06	3.0784e+06	4.99291e+06
DG(17:0_20:4)	DG	M+NH4	648.556	15.6645	C40 H74 O5 N1	3.67947e+07	3.65306e+07	3.36373e+07	4.27752e+07	3.52735e+07	4.95853e+07	4.89944e+07	4.18276e+07	4.65643e+07	4.21663e+07	4.17877e+07	3.98452e+07	3.87133e+07	4.18903e+07	3.76741e+07	4.25524e+07	3.77647e+07
DG(37:4)	DG	M+H	631.53	16.98	C40 H71 O5	9.88253e+06	7.63343e+06	5.0782e+06	1.01326e+07	1.35684e+07	2.20327e+07	1.2161e+07	9.36551e+06	1.79455e+07	1.60952e+07	1.31694e+07	1.17101e+07	1.13338e+07	1.06861e+07	1.12418e+07	1.09686e+07	1.19801e+07
DG(37:5)	DG	M+H	629.514	15.974	C40 H69 O5	3.90544e+07	3.10252e+07	3.39447e+07	4.41764e+07	4.79324e+07	7.05134e+07	5.28627e+07	3.587e+07	5.90859e+07	5.13215e+07	4.49592e+07	4.37261e+07	4.36243e+07	4.10113e+07	3.97034e+07	4.45304e+07	3.93853e+07
DG(15:0_22:6)	DG	M+NH4	644.525	13.837	C40 H70 O5 N1	4.82586e+06	5.34926e+06	3.5654e+06	7.09683e+06	3.59478e+06	1.1275e+07	1.02353e+07	4.27151e+06	9.86379e+06	7.59047e+06	7.05112e+06	6.61078e+06	5.43774e+06	6.27147e+06	6.69911e+06	5.98901e+06	6.37955e+06
DG(20:0_18:1)	DG	M+Na	673.574	18.3795	C41 H78 O5 Na1	1.02008e+07	8.26649e+06	1.00229e+07	1.52655e+07	1.77311e+07	1.6641e+07	7.28353e+06	1.05372e+07	1.58756e+07	1.4227e+07	1.35884e+07	1.22719e+07	1.20089e+07	1.32848e+07	1.24638e+07	1.43351e+07	1.28885e+07
DG(38:1e)	DG	M+Na	659.595	21.6416	C41 H80 O4 Na1	5.2583e+06	6.10267e+06	9.7243e+06	8.80046e+06	5.54435e+06	8.05287e+06	6.68645e+06	7.63424e+06	1.67358e+07	1.18741e+07	9.33427e+06	9.72416e+06	7.73146e+06	7.39941e+06	8.31587e+06	7.12271e+06	7.76796e+06
DG(20:1_18:1)	DG	M+NH4	666.603	17.4664	C41 H80 O5 N1	5.28591e+07	5.84475e+07	7.83205e+07	1.05614e+08	1.43179e+08	2.29103e+08	1.09945e+08	8.75926e+07	2.13859e+08	1.27624e+08	1.05544e+08	1.0606e+08	1.01582e+08	1.02649e+08	9.83889e+07	1.06201e+08	9.95935e+07
DG(38:2e)	DG	M+H	635.597	18.4475	C41 H79 O4	6.59176e+06	6.81788e+06	4.69943e+06	3.48163e+06	2.96898e+06	4.23137e+06	1.44453e+07	1.18801e+06	9.36255e+06	9.09209e+06	6.26783e+06	5.73024e+06	5.76082e+06	5.61733e+06	4.97924e+06	5.50631e+06	5.71268e+06
DG(20:1_18:2)	DG	M+Na	669.543	16.542	C41 H74 O5 Na1	9.41596e+07	9.0348e+07	1.00507e+08	1.19987e+08	1.87407e+08	2.18385e+08	1.41443e+08	1.07631e+08	2.09373e+08	1.74852e+08	1.44607e+08	1.54794e+08	1.37488e+08	1.50867e+08	1.44329e+08	1.40925e+08	1.43487e+08
DG(18:0_20:3)	DG	M+NH4	664.587	16.8519	C41 H78 O5 N1	1.47295e+08	1.4076e+08	1.24493e+08	2.02533e+08	1.48739e+08	3.76575e+08	2.4075e+08	2.42371e+08	2.46029e+08	1.91648e+08	1.98062e+08	1.89773e+08	1.87623e+08	1.73061e+08	1.78016e+08	1.87552e+08	1.84253e+08
DG(38:3e)	DG	M+H	633.582	21.6912	C41 H77 O4	1.02754e+07	1.4213e+07	2.60196e+07	2.53141e+07	1.81492e+07	2.6257e+07	2.05752e+07	1.69271e+07	3.90469e+07	3.01729e+07	2.34978e+07	2.23559e+07	2.11366e+07	1.94707e+07	2.14346e+07	2.18773e+07	2.08735e+07
DG(20:2_18:2)	DG	M+Na	667.527	15.6355	C41 H72 O5 Na1	5.17063e+07	4.0747e+07	5.70321e+07	6.64882e+07	1.26146e+08	1.61224e+08	7.80266e+07	6.45075e+07	1.02003e+08	1.29794e+08	8.61146e+07	8.47145e+07	9.07125e+07	8.90326e+07	8.58328e+07	8.71127e+07	8.57478e+07
DG(16:0_22:4)	DG	M+Na	667.527	15.9477	C41 H72 O5 Na1	4.05173e+07	3.66341e+07	4.13187e+07	5.27621e+07	6.50137e+07	1.06207e+08	7.41648e+07	4.70024e+07	7.31643e+07	7.23533e+07	5.76081e+07	6.06616e+07	5.56284e+07	4.65799e+07	5.44381e+07	5.62824e+07	5.42681e+07
DG(18:0_20:4)	DG	M+H	645.545	16.2994	C41 H73 O5	1.52358e+08	1.45964e+08	9.96659e+07	1.94134e+08	1.88269e+08	3.693e+08	1.96437e+08	2.00045e+08	2.51861e+08	2.15382e+08	2.00944e+08	1.94504e+08	1.8912e+08	1.9241e+08	1.89162e+08	1.89074e+08	1.92011e+08
DG(38:4e)	DG	M+Na	653.548	17.0004	C41 H74 O4 Na1	1.4259e+07	1.29208e+07	8.28207e+06	1.08988e+07	1.30846e+07	1.80236e+07	2.42699e+07	1.08387e+07	1.06663e+07	1.55586e+07	1.45897e+07	1.27565e+07	1.30806e+07	1.3492e+07	1.18573e+07	1.26871e+07	1.35596e+07
DG(20:3_18:2)	DG	M+NH4	660.556	14.5553	C41 H74 O5 N1	2.06829e+08	1.84734e+08	1.82417e+08	2.31146e+08	3.55293e+08	3.97876e+08	2.6436e+08	2.45199e+08	3.82877e+08	3.67722e+08	2.85261e+08	2.79689e+08	2.74366e+08	2.76948e+08	2.68416e+08	2.72249e+08	2.79259e+08
DG(18:1_20:4)	DG	M+NH4	660.556	15.0111	C41 H74 O5 N1	8.17015e+08	8.83813e+08	7.73105e+08	1.10457e+09	9.25209e+08	2.14958e+09	1.33424e+09	1.11613e+09	1.59717e+09	1.23713e+09	1.11513e+09	1.07097e+09	1.08941e+09	1.05588e+09	1.04642e+09	1.08833e+09	1.04033e+09
DG(38:5e)	DG	M+H	629.55	16.1236	C41 H73 O4	1.17686e+07	1.3225e+07	1.09063e+07	1.52831e+07	1.31008e+07	3.53588e+07	3.35797e+07	1.41922e+07	2.12345e+07	2.10096e+07	1.77367e+07	1.66496e+07	1.61796e+07	1.58972e+07	1.59706e+07	1.61799e+07	1.48117e+07
DG(18:2_20:4)	DG	M+NH4	658.541	13.8714	C41 H72 O5 N1	7.64626e+08	6.81019e+08	4.7645e+08	7.02659e+08	9.29591e+08	2.34501e+09	1.41701e+09	8.83681e+08	1.71463e+09	1.15482e+09	9.86457e+08	9.78416e+08	9.48514e+08	9.80762e+08	9.70119e+08	9.77656e+08	9.8367e+08
DG(16:0_22:6)	DG	M+NH4	658.541	14.5512	C41 H72 O5 N1	5.59147e+08	6.20005e+08	6.5845e+08	7.70519e+08	6.07923e+08	9.31263e+08	8.84503e+08	7.74193e+08	8.17008e+08	9.67805e+08	7.57988e+08	7.51437e+08	7.54533e+08	7.52197e+08	7.55171e+08	7.56654e+08	7.56651e+08
DG(38:6e)	DG	M+Na	649.517	15.7007	C41 H70 O4 Na1	1.00224e+07	1.28669e+07	1.74878e+07	1.28163e+07	1.67651e+07	2.3513e+07	4.91189e+07	9.04222e+06	2.35815e+07	2.55775e+07	1.76796e+07	1.91134e+07	1.75075e+07	1.83782e+07	1.66453e+07	1.69861e+07	1.8461e+07
DG(20:5_18:2)	DG	M+NH4	656.525	12.8713	C41 H70 O5 N1	4.53191e+07	3.62093e+07	2.24559e+07	4.53976e+07	6.85985e+07	2.24559e+08	1.26352e+08	4.37876e+07	1.55534e+08	7.38832e+07	7.56858e+07	7.26055e+07	8.17413e+07	7.60482e+07	7.54284e+07	7.18562e+07	7.66688e+07
DG(16:1_22:6)	DG	M+NH4	656.525	13.204	C41 H70 O5 N1	3.29104e+07	4.53296e+07	3.6632e+07	5.03226e+07	6.71491e+07	1.91927e+08	1.1175e+08	5.37028e+07	1.48287e+08	9.69942e+07	7.63142e+07	7.54312e+07	7.67482e+07	6.8105e+07	7.27891e+07	7.03933e+07	7.53237e+07
DG(38:7e)	DG	M+Na	647.501	19.9279	C41 H68 O4 Na1	5.74624e+06	3.41165e+06	2.35519e+06	3.81287e+06	2.06167e+06	8.63623e+06	4.49689e+06	6.38848e+06	7.02803e+06	9.65604e+06	7.04261e+06	6.14426e+06	4.73298e+06	9.62411e+06	5.9233e+06	5.38776e+06	4.89512e+06
DG(18:3_20:5)	DG	M+NH4	654.509	11.8264	C41 H68 O5 N1	0	0	0	1.032	1.27121e+06	9.91676e+06	4.67797e+06	0	6.33253e+06	1.41353e+06	2.36525e+06	1.16898e+06	1.53482e+06	958106	766781	2.61245e+06	2.42279e+06
DG(38:8e)	DG	M+Na	645.485	15.971	C41 H66 O4 Na1	6.44454e+06	4.6681e+06	4.60919e+06	5.27972e+06	8.03957e+06	1.01555e+07	7.06834e+06	4.7651e+06	7.70034e+06	7.82545e+06	6.82712e+06	6.2181e+06	6.49645e+06	6.26722e+06	6.57973e+06	7.01207e+06	6.47643e+06
DG(39:1)	DG	M+NH4	682.634	16.412	C42 H84 O5 N1	4.55213e+06	4.58495e+06	8.18599e+06	4.81145e+06	2.30021e+06	5.23625e+06	9.26113e+06	6.85376e+06	5.58324e+06	5.21548e+06	5.7145e+06	6.22007e+06	3.53215e+06	5.15104e+06	4.17713e+06	4.80675e+06	4.57432e+06
DG(18:2_21:0)	DG	M+NH4	680.619	17.911	C42 H82 O5 N1	3.65496e+06	3.51951e+06	3.92748e+06	4.68159e+06	4.13685e+06	5.84537e+06	3.26307e+06	4.73879e+06	9.2713e+06	3.97189e+06	3.47673e+06	5.71631e+06	4.42499e+06	3.59427e+06	3.56162e+06	3.59827e+06	4.12845e+06
DG(19:0_20:4)	DG	M+NH4	676.587	16.8935	C42 H78 O5 N1	2.07525e+07	2.22627e+07	1.71491e+07	2.40962e+07	1.66819e+07	3.27862e+07	2.47364e+07	2.61845e+07	2.72612e+07	1.99163e+07	2.20012e+07	2.23634e+07	2.15906e+07	2.05046e+07	2.03259e+07	2.05517e+07	2.13562e+07
DG(39:5)	DG	M+H	657.545	16.989	C42 H73 O5	4.66142e+06	3.44946e+06	2.25637e+06	8.30092e+06	8.2203e+06	1.62851e+07	6.33205e+06	5.29025e+06	8.03689e+06	9.92237e+06	6.67313e+06	5.39455e+06	6.55571e+06	1.10075e+07	6.24974e+06	5.27482e+06	5.56999e+06
DG(17:0_22:6)	DG	M+Na	677.512	15.2009	C42 H70 O5 Na1	1.40178e+07	1.27478e+07	1.04273e+07	1.27391e+07	8.49525e+06	1.21536e+07	1.56967e+07	1.35399e+07	1.17247e+07	1.30212e+07	1.31826e+07	1.24974e+07	1.18281e+07	1.2867e+07	1.32213e+07	1.0657e+07	1.20867e+07
DG(18:1_22:0)	DG	M+NH4	696.65	19.0834	C43 H86 O5 N1	6.95437e+06	6.33507e+06	7.0508e+06	1.08164e+07	5.79437e+06	7.41355e+06	3.41918e+06	6.34912e+06	6.44869e+06	5.28711e+06	6.04498e+06	6.39009e+06	7.00343e+06	6.19409e+06	5.10106e+06	5.69015e+06	7.1464e+06
DG(40:1e)	DG	M+H	665.644	16.196	C43 H85 O4	435142	768559	568907	808315	1.56867e+06	762991	955960	806353	294438	1.04017e+06	363603	539954	1.41441e+06	831246	745065	642378	1.05485e+06
DG(18:1_22:1)	DG	M+NH4	694.634	18.3117	C43 H84 O5 N1	1.23966e+07	1.56363e+07	1.44216e+07	2.38038e+07	1.67945e+07	2.47406e+07	1.15888e+07	1.52293e+07	3.05323e+07	2.1036e+07	1.8116e+07	1.90555e+07	1.74484e+07	1.80762e+07	1.81612e+07	1.67934e+07	1.77643e+07
DG(40:3)	DG	M+NH4	692.619	16.53	C43 H82 O5 N1	7.08308e+06	5.56331e+06	4.50786e+06	5.13476e+06	1.23426e+07	1.50515e+07	9.14649e+06	6.98428e+06	1.39562e+07	1.15814e+07	9.10349e+06	1.03747e+07	9.93707e+06	9.2107e+06	9.64787e+06	8.98123e+06	9.32583e+06
DG(18:1_22:2)	DG	M+NH4	692.619	17.5771	C43 H82 O5 N1	3.02871e+07	3.51442e+07	3.12148e+07	5.03329e+07	4.11694e+07	5.89463e+07	3.10407e+07	3.42905e+07	7.04212e+07	4.11115e+07	4.00574e+07	4.09666e+07	3.94813e+07	3.88535e+07	3.76094e+07	3.89946e+07	3.99625e+07
DG(40:3e)	DG	M+NH4	678.639	18.3653	C43 H84 O4 N1	6.75686e+06	9.27375e+06	7.40907e+06	4.46046e+06	4.61541e+06	7.778e+06	2.43257e+07	1.36007e+06	1.33334e+07	1.23476e+07	7.43e+06	7.59571e+06	7.95838e+06	7.52348e+06	6.7302e+06	6.78729e+06	8.08401e+06
DG(40:4)	DG	M+NH4	690.603	16.2828	C43 H80 O5 N1	1.25691e+08	1.10906e+08	9.34498e+07	1.12295e+08	9.28708e+07	1.31931e+08	1.24405e+08	1.26735e+08	1.09384e+08	1.14167e+08	1.08139e+08	1.10853e+08	1.16818e+08	1.1279e+08	1.05392e+08	1.08183e+08	1.20279e+08
DG(18:1_22:3)	DG	M+NH4	690.603	16.686	C43 H80 O5 N1	1.02239e+07	2.38699e+06	3.69638e+06	9.94287e+06	1.03949e+07	8.86719e+06	2.59977e+06	8.21883e+06	1.27679e+07	7.31334e+06	6.42797e+06	5.53234e+06	4.51589e+06	4.24254e+06	4.8871e+06	6.6475e+06	6.36379e+06
DG(18:0_22:4)	DG	M+Na	695.558	17.1185	C43 H76 O5 Na1	1.43023e+07	1.20149e+07	1.07779e+07	1.19174e+07	1.40255e+07	2.11949e+07	1.81702e+07	1.36873e+07	1.30723e+07	1.49686e+07	1.24487e+07	1.38249e+07	1.45541e+07	1.42631e+07	1.30647e+07	1.24554e+07	1.30106e+07
DG(20:0_20:4)	DG	M+NH4	690.603	17.4249	C43 H80 O5 N1	2.97164e+07	2.76186e+07	2.23073e+07	2.89006e+07	2.47624e+07	3.41023e+07	1.75777e+07	2.75495e+07	4.14623e+07	2.4616e+07	2.78884e+07	2.54965e+07	2.63185e+07	2.48567e+07	2.48698e+07	2.47795e+07	2.40892e+07
DG(40:4e)	DG	M+NH4	676.624	17.9896	C43 H82 O4 N1	6.14331e+06	7.67404e+06	6.43042e+06	8.50107e+06	7.4499e+06	1.31385e+07	1.63891e+07	8.38101e+06	1.12452e+07	1.08041e+07	8.44111e+06	7.90082e+06	7.41083e+06	8.70309e+06	8.92044e+06	8.17862e+06	8.64196e+06
DG(40:5)	DG	M+NH4	688.587	15.041	C43 H78 O5 N1	3.92584e+07	3.55432e+07	3.49229e+07	4.28356e+07	6.2498e+07	1.08353e+08	6.18104e+07	4.20505e+07	7.90424e+07	6.80416e+07	5.29851e+07	5.36857e+07	5.27919e+07	5.62151e+07	5.42924e+07	5.4435e+07	5.4954e+07
DG(18:1_22:4)	DG	M+Na	693.543	15.9403	C43 H74 O5 Na1	8.21298e+07	7.14018e+07	6.96681e+07	9.39804e+07	1.07587e+08	1.57053e+08	1.27419e+08	9.36768e+07	1.37183e+08	1.52393e+08	1.1095e+08	1.12046e+08	1.11044e+08	1.07605e+08	1.10613e+08	1.1229e+08	1.09391e+08
DG(20:1_20:4)	DG	M+Na	693.543	16.2661	C43 H74 O5 Na1	3.89264e+07	3.49929e+07	2.98869e+07	3.58405e+07	3.13811e+07	5.66256e+07	5.15026e+07	3.5692e+07	4.8128e+07	4.25963e+07	4.09102e+07	4.12536e+07	4.14245e+07	4.16769e+07	4.04584e+07	4.09951e+07	3.86905e+07
DG(18:0_22:5)	DG	M+NH4	688.587	16.7331	C43 H78 O5 N1	5.07863e+06	5.0784e+06	4.13572e+06	9.31468e+06	5.73295e+06	9.28079e+06	7.03403e+06	7.12869e+06	5.28952e+06	6.17933e+06	5.38341e+06	4.79488e+06	5.08389e+06	4.23025e+06	6.23169e+06	6.29129e+06	6.43082e+06
DG(40:5e)	DG	M+NH4	674.608	16.9746	C43 H80 O4 N1	8.26522e+06	1.12623e+07	9.23061e+06	8.6513e+06	9.26947e+06	2.69766e+07	2.88102e+07	1.18415e+07	2.02135e+07	1.8761e+07	1.23319e+07	1.29689e+07	1.24036e+07	1.17269e+07	1.10252e+07	1.33287e+07	1.20261e+07
DG(40:6)	DG	M+NH4	686.572	13.8669	C43 H76 O5 N1	3.08892e+07	2.19242e+07	1.59781e+07	2.21873e+07	5.33545e+07	9.63487e+07	4.09148e+07	2.62741e+07	6.9576e+07	5.09203e+07	4.05872e+07	4.1227e+07	4.3425e+07	4.28623e+07	4.06646e+07	4.07964e+07	4.06545e+07
DG(22:4_18:2)	DG	M+NH4	686.572	14.8969	C43 H76 O5 N1	8.00433e+07	6.66607e+07	5.92666e+07	8.51966e+07	1.39052e+08	3.12275e+08	1.63421e+08	1.14929e+08	2.33648e+08	1.70151e+08	1.22117e+08	1.32294e+08	1.33181e+08	1.16174e+08	1.18466e+08	1.30795e+08	1.28799e+08
DG(18:0_22:6)	DG	M+NH4	686.572	15.8453	C43 H76 O5 N1	2.88047e+08	2.90575e+08	2.37166e+08	3.42916e+08	2.13317e+08	7.13316e+08	6.34592e+08	4.23463e+08	4.96383e+08	4.20208e+08	3.70617e+08	3.41339e+08	3.57319e+08	3.38363e+08	3.41405e+08	3.34939e+08	3.36264e+08
DG(40:6e)	DG	M+NH4	672.593	16.9146	C43 H78 O4 N1	2.12053e+07	2.93992e+07	2.12506e+07	2.10061e+07	1.88478e+07	4.2778e+07	8.83851e+07	1.58356e+07	5.7207e+07	4.05559e+07	3.08905e+07	3.05732e+07	2.96924e+07	2.86865e+07	2.74601e+07	2.86297e+07	2.82729e+07
DG(22:5_18:2)	DG	M+NH4	684.556	13.908	C43 H74 O5 N1	5.89722e+07	4.69889e+07	3.80106e+07	5.00708e+07	1.31262e+08	5.07982e+08	2.01959e+08	8.17789e+07	3.37148e+08	1.55872e+08	1.25739e+08	1.23383e+08	1.24252e+08	1.33589e+08	1.27786e+08	1.37616e+08	1.31921e+08
DG(20:3_20:4)	DG	M+NH4	684.556	14.2755	C43 H74 O5 N1	1.10738e+08	8.93555e+07	7.25372e+07	1.12433e+08	3.80595e+07	3.17339e+08	3.02557e+07	1.2958e+08	2.99149e+08	2.12241e+08	2.1152e+07	1.58308e+08	1.74834e+08	3.57919e+07	1.75306e+08	3.15278e+07	1.47483e+07
DG(18:1_22:6)	DG	M+NH4	684.556	14.5801	C43 H74 O5 N1	3.68309e+08	3.47377e+08	3.37606e+08	3.98797e+08	6.27575e+08	9.81257e+08	5.57366e+08	4.51425e+08	7.60201e+08	5.48005e+08	5.01627e+08	5.3607e+08	5.15143e+08	5.22486e+08	4.64264e+08	5.27715e+08	4.7275e+08
DG(40:7e)	DG	M+Na	675.532	15.6736	C43 H72 O4 Na1	2.64816e+06	2.58531e+06	4.57558e+06	3.54444e+06	6.85292e+06	1.31172e+07	1.47163e+07	1.53621e+06	3.07963e+06	9.61634e+06	5.64533e+06	5.73612e+06	5.82038e+06	6.46999e+06	5.24072e+06	5.41747e+06	5.51044e+06
DG(18:3_22:5)	DG	M+NH4	682.541	12.88	C43 H72 O5 N1	0	0	0	594369	378307	4.25195e+06	1.12286e+06	0	3.70298e+06	0	870563	868936	428261	506192	0	0	873118
DG(18:2_22:6)	DG	M+NH4	682.541	13.4246	C43 H72 O5 N1	6.17465e+08	5.72049e+08	4.32385e+08	4.27602e+08	9.31815e+08	2.18705e+09	1.20221e+09	7.44032e+08	1.43986e+09	9.95015e+08	8.11483e+08	8.0121e+08	8.17072e+08	8.21845e+08	7.99057e+08	8.15905e+08	7.90094e+08
DG(18:3_22:6)	DG	M+NH4	680.525	12.4283	C43 H70 O5 N1	3.41879e+07	3.04214e+07	2.20556e+07	2.93356e+07	5.25488e+07	1.85746e+08	1.08102e+08	4.35191e+07	1.45941e+08	6.82065e+07	5.98425e+07	5.85199e+07	6.25362e+07	5.76591e+07	6.12571e+07	6.17905e+07	5.84941e+07
DG(40:9e)	DG	M+Na	671.501	16.006	C43 H68 O4 Na1	1.53902e+06	1.0426e+06	1.30419e+06	1.33073e+06	5.66079e+06	7.24953e+06	2.85222e+06	1.47997e+06	3.77536e+06	4.48151e+06	3.60912e+06	3.31728e+06	3.17459e+06	3.48915e+06	3.12417e+06	3.2033e+06	2.90141e+06
DG(41:4)	DG	M+NH4	704.619	16.2863	C44 H82 O5 N1	1.90837e+07	1.52746e+07	7.60373e+06	9.20268e+06	8.3021e+06	1.83644e+07	1.8179e+07	1.83233e+07	1.4438e+07	1.69253e+07	1.42445e+07	1.3443e+07	1.56988e+07	1.36048e+07	1.35524e+07	1.49651e+07	1.34069e+07
DG(41:4e)	DG	M+Na	695.595	14.282	C44 H80 O4 Na1	1.41542e+06	2.85533e+06	2.40488e+06	5.17189e+06	4.63124e+06	1.85339e+06	2.001e+06	3.45802e+06	1.03961e+07	0	2.66194e+06	3.28064e+06	5.03026e+06	3.39818e+06	3.66624e+06	2.47751e+06	4.33023e+06
DG(19:0_22:6)	DG	M+NH4	700.587	16.4655	C44 H78 O5 N1	4.89451e+06	5.67471e+06	3.92975e+06	4.86606e+06	3.21069e+06	9.44895e+06	7.69101e+06	4.87917e+06	8.02528e+06	5.28246e+06	4.84264e+06	5.08643e+06	4.40729e+06	4.46803e+06	5.75912e+06	4.26335e+06	4.73972e+06
DG(18:1_24:0)	DG	M+NH4	724.681	19.6578	C45 H90 O5 N1	5.16568e+06	1.53566e+07	3.02434e+07	5.78511e+06	8.44955e+06	6.14752e+06	5.07883e+06	1.84435e+07	7.64573e+06	3.70913e+06	1.00438e+07	8.6387e+06	7.99736e+06	8.49753e+06	8.81171e+06	8.73313e+06	8.09807e+06
DG(20:4_22:6)	DG	M+NH4	706.541	13.0771	C45 H72 O5 N1	3.07618e+07	3.05252e+07	2.89306e+07	3.10106e+07	4.49954e+07	5.31424e+07	3.72863e+07	3.62531e+07	3.68456e+07	5.09759e+07	4.1383e+07	4.13657e+07	4.25117e+07	3.64038e+07	3.71469e+07	3.99356e+07	4.32798e+07
DG(20:5_22:6)	DG	M+NH4	704.525	12.0803	C45 H70 O5 N1	4.55118e+06	4.76707e+06	2.12465e+06	6.20559e+06	6.71372e+06	4.12512e+07	2.26468e+07	7.67534e+06	1.84749e+07	1.12999e+07	1.09643e+07	9.85514e+06	1.03452e+07	1.17392e+07	9.43524e+06	9.27475e+06	1.16213e+07
DG(42:2)	DG	M+Na	727.621	15.3085	C45 H84 O5 Na1	8.28544e+07	1.11837e+08	1.4524e+08	1.4812e+08	6.48191e+07	1.12515e+08	9.52793e+07	1.32682e+08	1.331e+08	5.36887e+07	9.08436e+07	9.63874e+07	9.3304e+07	8.95104e+07	9.39008e+07	9.25695e+07	9.58464e+07
DG(24:0_18:2)	DG	M+Na	727.621	15.8138	C45 H84 O5 Na1	3.28725e+07	4.82796e+07	7.03761e+07	6.81305e+07	2.34783e+07	5.95941e+07	4.82348e+07	6.77975e+07	6.29288e+07	2.30109e+07	4.62025e+07	4.35767e+07	4.13872e+07	4.13951e+07	4.08954e+07	3.94671e+07	4.17944e+07
DG(18:1_24:1)	DG	M+Na	727.621	16.301	C45 H84 O5 Na1	3.61122e+06	6.65329e+06	9.69339e+06	8.42483e+06	4.48836e+06	6.36159e+06	5.90225e+06	1.09072e+07	7.43884e+06	3.55319e+06	5.25352e+06	5.089e+06	6.45401e+06	7.13646e+06	4.09041e+06	5.16637e+06	4.26079e+06
DG(24:1_18:2)	DG	M+NH4	720.65	18.412	C45 H86 O5 N1	9.78842e+06	9.80372e+06	1.05255e+07	1.62932e+07	8.74531e+06	1.14596e+07	7.5978e+06	7.77147e+06	1.31755e+07	8.13068e+06	9.39918e+06	9.46543e+06	9.28726e+06	9.42834e+06	9.63417e+06	1.02925e+07	9.35184e+06
DG(42:3e)	DG	M+Na	711.626	17.5823	C45 H84 O4 Na1	4.24915e+06	5.83472e+06	1.0762e+07	1.11093e+07	4.7506e+06	6.30196e+06	5.36931e+06	6.95175e+06	8.86975e+06	2.58212e+06	5.90888e+06	6.03723e+06	5.76221e+06	5.01439e+06	5.20201e+06	4.83787e+06	5.32667e+06
DG(20:2_22:4)	DG	M+NH4	714.603	15.8595	C45 H80 O5 N1	3.63698e+07	3.29516e+07	3.34097e+07	4.06754e+07	3.58006e+07	7.01459e+07	6.60483e+07	4.66837e+07	6.09243e+07	6.02098e+07	4.81204e+07	4.68362e+07	4.00572e+07	4.77696e+07	5.10689e+07	4.67021e+07	4.30878e+07
DG(20:1_22:5)	DG	M+NH4	714.603	16.2705	C45 H80 O5 N1	1.06778e+07	1.18715e+07	8.68483e+06	1.93606e+07	1.71491e+07	2.75609e+07	1.80306e+07	1.78626e+07	2.97473e+07	2.36998e+07	1.81662e+07	1.50004e+07	1.61784e+07	1.72064e+07	1.56294e+07	1.52793e+07	1.69254e+07
DG(20:0_22:6)	DG	M+NH4	714.603	17.0465	C45 H80 O5 N1	7.23283e+06	6.43961e+06	3.05703e+06	5.05349e+06	5.28826e+06	1.77717e+07	1.11235e+07	6.70946e+06	1.52946e+07	1.32645e+07	9.08366e+06	7.66249e+06	7.47948e+06	7.42126e+06	7.54618e+06	7.0224e+06	8.06621e+06
DG(42:6e)	DG	M+H	683.597	17.9273	C45 H79 O4	2.30391e+06	8.02348e+07	5.42799e+08	4.48329e+08	2.15865e+08	4.81426e+06	1.07456e+07	1.89131e+07	8.79799e+07	6.56246e+06	1.27686e+08	1.27496e+08	1.20609e+08	123606705	1.24983e+08	1.37909e+08	1.22006e+08
DG(20:1_22:6)	DG	M+NH4	712.587	15.816	C45 H78 O5 N1	1.31169e+07	1.53953e+07	1.15183e+07	1.78665e+07	1.69294e+07	6.41871e+07	4.3465e+07	2.12297e+07	4.64976e+07	3.28123e+07	2.36378e+07	2.20836e+07	2.25274e+07	2.39319e+07	2.1858e+07	2.13799e+07	2.17315e+07
DG(20:3_22:5)	DG	M+NH4	710.572	14.2799	C45 H76 O5 N1	3.03341e+07	2.76039e+07	1.95735e+07	3.42595e+07	6.4179e+07	8.3519e+07	4.88022e+07	4.19049e+07	1.07009e+08	6.34576e+07	4.59743e+07	4.41034e+07	4.18674e+07	4.11709e+07	4.8948e+07	4.57761e+07	4.47822e+07
DG(20:2_22:6)	DG	M+NH4	710.572	14.7131	C45 H76 O5 N1	4.67926e+06	1.28264e+06	813972	1.84334e+06	1.03207e+07	1.27589e+07	1.03458e+07	3.84542e+06	2.64089e+06	6.0165e+06	6.43811e+06	9.61518e+06	1.39598e+06	2.68215e+06	4.62657e+06	1.64685e+06	1.45298e+06
DG(22:5_20:4)	DG	M+NH4	708.556	13.5662	C45 H74 O5 N1	8.31242e+06	5.97324e+06	6.1986e+06	8.37121e+06	1.21042e+07	3.69259e+07	2.58286e+07	9.83573e+06	2.77529e+07	1.52668e+07	1.49931e+07	1.48489e+07	1.24234e+07	1.36603e+07	1.31764e+07	1.22917e+07	1.15705e+07
DG(22:6_22:6)	DG	M+Na	735.496	12.5123	C47 H68 O5 Na1	3.75078e+06	3.0503e+06	2.37435e+06	3.83891e+06	6.41114e+06	1.75415e+07	7.74402e+06	3.49975e+06	9.19032e+06	8.27551e+06	5.85762e+06	7.09747e+06	6.3031e+06	5.70951e+06	7.00393e+06	7.3042e+06	8.2122e+06
DG(44:5)	DG	M+Na	749.605	15.293	C47 H82 O5 Na1	6.57304e+06	1.11681e+07	1.12724e+07	8.43331e+06	3.45961e+06	6.23873e+06	6.22139e+06	1.04218e+07	1.15756e+07	2.64062e+06	5.8441e+06	3.95294e+06	6.17078e+06	4.84316e+06	5.99033e+06	6.05119e+06	4.00769e+06
DG(22:1_22:6)	DG	M+NH4	740.619	16.974	C47 H82 O5 N1	2.40894e+06	2.43569e+06	1.90617e+06	3.10066e+06	3.40782e+06	6.3983e+06	3.74979e+06	2.16628e+06	6.68879e+06	3.95424e+06	2.45019e+06	3.22689e+06	3.07392e+06	3.27665e+06	3.91189e+06	2.96325e+06	3.17773e+06
DG(46:3)	DG	M+NH4	776.713	20.003	C49 H94 O5 N1	0	6.08373e+06	2.52415e+06	0	0.118	1.982	0	2.289	1.22503e+06	0	1.801	783509	787299	0	0	0	0.193
DG(49:0)	DG	M+NH4	824.807	21.723	C52 H106 O5 N1	7.94233e+06	1.16784e+07	5.43273e+06	4.05212e+06	2.13491e+06	1.02245e+07	1.93979e+07	6.01489e+06	3.11626e+07	1.82036e+07	1.09582e+07	1.0318e+07	9.8452e+06	9.56995e+06	9.74336e+06	9.66384e+06	1.07236e+07
DG(50:0)	DG	M+Na	843.778	21.1864	C53 H104 O5 Na1	1.85933e+07	2.42447e+07	9.48202e+06	4.26654e+06	8.51863e+06	1.12663e+07	2.36838e+07	1.32705e+07	1.88144e+07	1.73601e+07	1.70427e+07	1.4889e+07	1.13595e+07	1.10406e+07	9.23821e+06	1.37607e+07	1.67512e+07
DG(50:1)	DG	M+H	819.78	21.527	C53 H103 O5	1.79567e+07	2.75474e+07	2.36243e+07	1.8335e+07	1.25949e+07	2.85129e+07	2.82028e+07	2.09767e+07	3.1477e+07	2.48919e+07	2.06021e+07	2.11873e+07	2.18936e+07	2.02158e+07	2.17586e+07	2.18577e+07	2.22972e+07
DG(51:0)	DG	M+NH4	852.838	22.004	C54 H110 O5 N1	1.09426e+07	1.24902e+07	7.85938e+06	7.24459e+06	4.10066e+06	1.82498e+07	2.34171e+07	7.97428e+06	3.46177e+07	2.48579e+07	1.23005e+07	1.24948e+07	1.29909e+07	1.31636e+07	1.17433e+07	1.2262e+07	1.28221e+07
DG(51:1)	DG	M+NH4	850.822	21.6925	C54 H108 O5 N1	1.76984e+07	2.33102e+07	8.42137e+06	8.00663e+06	2.90802e+06	1.73024e+07	3.33368e+07	1.20954e+07	4.31302e+07	3.31532e+07	1.76961e+07	1.93312e+07	1.92034e+07	1.46492e+07	1.63631e+07	1.21545e+07	1.65427e+07
DG(52:1)	DG	M+NH4	864.838	21.841	C55 H110 O5 N1	3.46495e+08	4.52079e+08	3.8562e+08	2.72484e+08	1.8145e+08	4.4033e+08	6.1605e+08	2.75237e+08	6.55068e+08	5.05392e+08	3.73492e+08	3.55652e+08	3.83856e+08	3.61091e+08	3.57483e+08	3.68492e+08	3.74396e+08
DG(54:0)	DG	M+NH4	894.885	22.416	C57 H116 O5 N1	2.75696e+07	3.05793e+07	2.43801e+07	2.31938e+07	1.78139e+07	5.19832e+07	6.53873e+07	2.89826e+07	7.78104e+07	5.79459e+07	3.73587e+07	3.63624e+07	3.68447e+07	3.32939e+07	3.58654e+07	3.46736e+07	3.50775e+07
DG(55:1)	DG	M+NH4	906.885	21.8433	C58 H116 O5 N1	2.06931e+08	3.13801e+08	9.32416e+08	8.40366e+08	5.33847e+08	5.62648e+08	4.58722e+08	3.24986e+08	7.71664e+08	6.0234e+08	5.4408e+08	5.12489e+08	5.17402e+08	4.64268e+08	4.89697e+08	5.15133e+08	5.0525e+08
DG(55:2)	DG	M+NH4	904.869	21.9884	C58 H114 O5 N1	1.57503e+07	2.0679e+07	1.29205e+07	1.02713e+07	2.62009e+07	2.05117e+07	3.7827e+07	9.68167e+06	5.32687e+07	3.88452e+07	2.07351e+07	1.92409e+07	2.02833e+07	1.45214e+07	1.57749e+07	1.78608e+07	1.69289e+07
DG(56:1)	DG	M+Na	925.856	22.386	C59 H114 O5 Na1	8.99787e+06	7.1676e+06	6.62699e+06	6.59537e+06	7.18214e+06	8.56957e+06	1.07118e+07	4.45198e+06	1.43386e+07	1.50267e+07	8.94197e+06	9.02611e+06	9.29859e+06	9.69272e+06	9.66873e+06	8.99504e+06	9.42009e+06
DG(56:4)	DG	M+Na	919.809	18.715	C59 H108 O5 Na1	6.35966e+06	4.33986e+06	3.12674e+07	1.8162e+07	2.17069e+07	7.43476e+06	6.27895e+06	1.16561e+07	1.99107e+07	4.99539e+06	7.52612e+06	1.51185e+07	1.4141e+07	1.18742e+07	1.36477e+07	1.29481e+07	1.47005e+07
GM2(d40:1+O)	GM2	M+H	1456.89	15.0973	C71 H130 O27 N3	3.08561e+07	3.17815e+07	3.15862e+07	2.14715e+07	3.41323e+07	2.63526e+07	1.94914e+07	2.88368e+07	2.58668e+07	3.29366e+07	3.78332e+07	3.3778e+07	3.30514e+07	3.52714e+07	3.51847e+07	3.2957e+07	3.2236e+07
GM2(d41:1+O)	GM2	M+H	1470.9	15.6784	C72 H132 O27 N3	5.70084e+06	7.44042e+06	8.39943e+06	4.91308e+06	6.85661e+06	6.16842e+06	6.24446e+06	9.07786e+06	3.42299e+06	6.73112e+06	8.51431e+06	8.64511e+06	7.02437e+06	7.42337e+06	7.89051e+06	8.4064e+06	7.36399e+06
GM2(d42:1+O)	GM2	M+H	1484.92	16.2607	C73 H134 O27 N3	2.38893e+07	2.51811e+07	2.41592e+07	1.72303e+07	2.25896e+07	2.4041e+07	2.00776e+07	2.97319e+07	1.84697e+07	1.97551e+07	2.70638e+07	2.72238e+07	2.74564e+07	2.80379e+07	2.59016e+07	2.62891e+07	2.80829e+07
Hex1Cer(d18:0_16:0)	Hex1Cer	M+H	702.588	13.6345	C40 H80 O8 N1	0.9	0	362083	582864	52092.9	553038	3.13471e+06	0	0	0	0	1.18773e+06	0	929673	706734	518006	0
Hex1Cer(d18:1_22:0+O)	Hex1Cer	M+H	800.661	16.797	C46 H90 O9 N1	1.55378e+06	2.42058e+06	3.39375e+06	1.51617e+07	1.56899e+06	2.56617e+06	1.93275e+06	5.86276e+06	2.54508e+06	2.29701e+06	2.60366e+06	2.97676e+06	3.18395e+06	2.80104e+06	2.54512e+06	2.4158e+06	3.81067e+06
Hex1Cer(d17:1_24:1)	Hex1Cer	M+H	796.666	16.3764	C47 H90 O8 N1	4.49409e+06	7.41419e+06	7.9257e+06	9.80724e+06	4.68364e+06	1.38078e+07	1.4055e+07	1.38188e+07	1.05925e+07	1.06139e+07	9.307e+06	8.708e+06	8.8864e+06	7.53836e+06	9.12181e+06	6.60363e+06	8.63067e+06
Hex1Cer(d18:0_24:1)	Hex1Cer	M+H	812.697	17.3349	C48 H94 O8 N1	984094	1.68691e+06	1.94855e+06	3.94555e+06	1.31653e+06	4.27616e+06	6.21235e+06	4.01168e+06	2.95303e+06	1.29665e+06	7.70569e+06	2.53057e+06	3.11007e+06	3.48785e+06	5.60349e+06	2.87215e+06	2.20059e+06
Hex1Cer(d18:1_24:0+O)	Hex1Cer	M+H	828.692	16.3774	C48 H94 O9 N1	1.05467e+07	1.32531e+07	1.03861e+07	1.30535e+07	1.03847e+07	1.89077e+07	2.72142e+07	1.92433e+07	1.57924e+07	1.67233e+07	1.30732e+07	1.35295e+07	1.32191e+07	1.25803e+07	1.45731e+07	1.38711e+07	1.4885e+07
Hex1Cer(d18:1_25:0)	Hex1Cer	M+H	826.713	18.282	C49 H96 O8 N1	4.49228e+06	5.05349e+06	4.44831e+06	6.011e+06	2.89598e+06	8.87692e+06	9.55649e+06	6.27345e+06	5.74454e+06	5.39523e+06	6.62944e+06	6.21423e+06	5.27454e+06	6.26621e+06	5.41073e+06	4.73792e+06	5.42373e+06
Hex1Cer(d18:1_25:1)	Hex1Cer	M+H	824.697	17.4617	C49 H94 O8 N1	1.30766e+08	1.42698e+08	1.16547e+08	1.30311e+08	1.00863e+08	4.4267e+06	2.22591e+07	1.3739e+08	1.38331e+08	1.25166e+08	1.29138e+08	1.2676e+08	1.23192e+08	1.20216e+08	1.1776e+08	1.21349e+08	1.20611e+08
Hex1Cer(t18:0_16:0+O)	Hex1Cer	M+H	734.578	12.052	C40 H80 O10 N1	9.11872e+06	1.18541e+07	1.20849e+07	1.34737e+07	8.12902e+06	1.84e+07	1.95933e+07	1.50178e+07	1.43853e+07	1.43041e+07	1.26266e+07	1.15533e+07	1.26991e+07	1.1972e+07	1.08205e+07	1.06498e+07	1.15887e+07
Hex1Cer(t18:0_22:0)	Hex1Cer	M+H	802.677	16.4653	C46 H92 O9 N1	2.42709e+07	3.23671e+07	2.15692e+07	2.65638e+07	1.55399e+07	3.5561e+07	3.73108e+07	2.92697e+07	3.94804e+07	2.75124e+07	2.78733e+07	2.5513e+07	2.601e+07	2.7088e+07	2.66725e+07	2.69745e+07	2.53007e+07
Hex1Cer(t18:0_24:0)	Hex1Cer	M+H	830.708	17.5324	C48 H96 O9 N1	1.35849e+07	1.44006e+07	1.42048e+07	1.66235e+07	1.19773e+07	2.77278e+07	2.68922e+07	2.29057e+07	2.66494e+07	1.74932e+07	1.64906e+07	1.73806e+07	1.66729e+07	1.77733e+07	1.58293e+07	1.7783e+07	1.80087e+07
Hex1SPH(d18:1)	Hex1SPH	M+H	462.343	2.48949	C24 H48 O7 N1	1.38002e+06	1.57715e+06	1.67075e+06	2.08677e+06	2.53621e+06	4.12685e+06	6.1018e+06	1945488	2.11684e+06	3.92669e+06	3.21577e+06	2.41452e+06	3.39398e+06	2.08908e+06	3.41927e+06	3.13253e+06	3.70444e+06
Hex2Cer(d18:1_16:0)	Hex2Cer	M+H	862.625	12.6208	C46 H88 O13 N1	5.10879e+06	4.51896e+06	1.22404e+07	3.6104e+06	5.07865e+06	1.10514e+07	1.6643e+07	8.87518e+06	3.48614e+06	5.8599e+06	9.1399e+06	6.2818e+06	1.0935e+07	5.26955e+06	5.67738e+06	4.71487e+06	3.09225e+06
Hex2Cer(d18:2_16:0)	Hex2Cer	M+H	860.609	11.1002	C46 H86 O13 N1	1.67283e+06	1.41976e+06	1.14644e+06	1.56109e+06	1.96413e+06	3.67458e+06	3.38929e+06	290975	4.01328e+06	3.53892e+06	1.30283e+06	2.30988e+06	2.34464e+06	1.3774e+06	2.1447e+06	2.22762e+06	2.36323e+06
Hex2Cer(d18:1_20:0)	Hex2Cer	M+H	918.688	15.4701	C50 H96 O13 N1	1.09772e+07	1.6849e+07	1.20704e+07	1.56631e+07	8.24591e+06	1.77984e+07	2.51798e+07	2.22377e+07	1.30576e+07	1.14488e+07	1.44887e+07	1.48186e+07	1.48003e+07	1.37121e+07	1.46922e+07	1.23701e+07	1.21247e+07
Hex2Cer(d18:1_21:0)	Hex2Cer	M+H	932.703	16.0906	C51 H98 O13 N1	4.6187e+06	7.33319e+06	5.71005e+06	4.64127e+06	3.50329e+06	8.57759e+06	9.33384e+06	8.49049e+06	8.32838e+06	6.44086e+06	5.96939e+06	5.35239e+06	6.71719e+06	5.4249e+06	5.65734e+06	4.97034e+06	6.44015e+06
Hex2Cer(d18:0_22:0)	Hex2Cer	M+H	948.735	17.0749	C52 H102 O13 N1	2.03327e+06	2.28304e+06	1.15311e+06	2.23067e+06	1.1223e+06	3.80887e+06	4.50149e+06	3.21941e+06	1.35584e+06	1.7325e+06	2.47858e+06	2.94554e+06	2.46924e+06	1.93182e+06	2.39814e+06	2.18307e+06	2.21142e+06
Hex2Cer(d18:1_22:0)	Hex2Cer	M+H	946.719	16.6902	C52 H100 O13 N1	4.40297e+07	6.18731e+07	5.27611e+07	5.83527e+07	4.50883e+07	8.58931e+07	8.99636e+07	7.45021e+07	6.08932e+07	5.68902e+07	6.21875e+07	5.63544e+07	5.87842e+07	6.13236e+07	5.77399e+07	5.979e+07	6.42632e+07
Hex2Cer(d18:1_22:1)	Hex2Cer	M+H	944.703	15.377	C52 H98 O13 N1	1.52339e+06	4.06317e+06	3.35942e+06	2.78562e+06	2.99272e+06	3.58481e+06	6.83056e+06	4.80218e+06	4.00778e+06	6.23379e+06	3.85904e+06	2.24659e+06	3.95332e+06	2.25818e+06	3.23197e+06	3.53687e+06	3.74921e+06
Hex2Cer(d18:1_23:0)	Hex2Cer	M+H	960.735	17.1943	C53 H102 O13 N1	2.13194e+07	3.20276e+07	2.29034e+07	2.85939e+07	1.9744e+07	4.723e+07	6.25613e+07	4.15752e+07	2.90477e+07	2.81731e+07	2.91395e+07	3.27789e+07	3.25523e+07	2.93726e+07	2.88652e+07	3.02549e+07	3.17408e+07
Hex2Cer(d18:1_24:0)	Hex2Cer	M+H	974.75	17.6904	C54 H104 O13 N1	6.89947e+07	9.12286e+07	7.55396e+07	8.90804e+07	5.59753e+07	1.17579e+08	1.52868e+08	1.25958e+08	8.60678e+07	7.34598e+07	8.96168e+07	9.01344e+07	8.60905e+07	9.78323e+07	8.93078e+07	8.77551e+07	8.52018e+07
Hex2Cer(d18:1_24:0+O)	Hex2Cer	M+H	990.745	15.9786	C54 H104 O14 N1	2.3279e+06	3.21256e+06	2.89049e+06	3.97708e+06	2.78774e+06	4.67646e+06	8.05843e+06	4.98492e+06	5.15263e+06	3.24238e+06	3.74612e+06	3.26354e+06	3.6417e+06	3.64028e+06	3.37666e+06	3.76964e+06	3.65936e+06
Hex2Cer(d18:1_24:1)	Hex2Cer	M+H	972.735	16.5688	C54 H102 O13 N1	4.6547e+07	6.69516e+07	5.56183e+07	6.87418e+07	4.65276e+07	9.88587e+07	1.31863e+08	9.54567e+07	6.41106e+07	6.40096e+07	6.93034e+07	6.83369e+07	6.87896e+07	6.92815e+07	6.55702e+07	6.47552e+07	6.8598e+07
Hex2Cer(d18:1_24:2)	Hex2Cer	M+H	970.719	15.4921	C54 H100 O13 N1	3.22029e+06	3.36722e+06	3.52225e+06	5.90111e+06	3.52623e+06	5.42519e+06	1.24389e+07	7.21515e+06	4.45055e+06	2.87922e+06	4.5767e+06	4.85839e+06	4.34077e+06	3.78577e+06	4.47546e+06	6.81455e+06	5.6408e+06
Hex2Cer(t18:0_24:0)	Hex2Cer	M+H	992.761	17.2002	C54 H106 O14 N1	1.58358e+06	2.18417e+06	1.08951e+06	1.73338e+06	1.57408e+06	3.29103e+06	4.69587e+06	3.48766e+06	2.97546e+06	1.51589e+06	2.72548e+06	2.41193e+06	2.07955e+06	2.47826e+06	2.24727e+06	2.5618e+06	2.18267e+06
Hex2Cer(t18:0_24:1)	Hex2Cer	M+H	990.745	15.9872	C54 H104 O14 N1	2.32809e+06	3.21282e+06	2.89041e+06	3.97671e+06	2.78678e+06	4.67693e+06	8.05879e+06	4.98521e+06	5.30228e+06	3.24266e+06	3.74461e+06	3.26362e+06	3.64114e+06	3.64217e+06	3.3742e+06	3.77157e+06	3.65926e+06
Hex2Cer(t43:0)	Hex2Cer	M+H	1006.78	18.5316	C55 H108 O14 N1	1.01968e+07	1.2863e+07	1.07029e+07	1.17627e+07	9.86428e+06	2.0626e+07	1.64362e+07	1.00962e+07	1.58664e+07	1.49147e+07	1.42397e+07	1.17114e+07	1.14522e+07	1.48017e+07	1.18952e+07	1.10772e+07	1.40032e+07
Hex2Cer(t43:2)	Hex2Cer	M+H	1002.75	17.5579	C55 H104 O14 N1	4.26181e+06	5.05855e+06	4.21434e+06	5.50605e+06	3.55664e+06	1.12004e+07	1.45912e+07	5.81118e+06	8.61984e+06	7.09252e+06	5.7528e+06	5.96532e+06	6.38947e+06	6.15478e+06	5.48194e+06	6.3138e+06	6.341e+06
Hex2Cer(t45:0)	Hex2Cer	M+H	1034.81	19.112	C57 H112 O14 N1	1.23952e+07	1.20899e+07	6.72009e+06	8.05984e+06	8.82866e+06	7.66864e+06	1.45277e+07	1.60773e+07	6.18298e+06	1.2473e+07	1.13313e+07	1.13842e+07	1.15474e+07	1.14797e+07	1.17581e+07	1.00306e+07	1.12726e+07
Hex2Cer(t45:1)	Hex2Cer	M+H	1032.79	18.5408	C57 H110 O14 N1	4.75483e+06	6.73775e+06	4.21633e+06	6.66917e+06	4.37979e+06	6.68147e+06	8.4386e+06	5.12148e+06	8.43119e+06	7.67576e+06	7.11022e+06	5.68277e+06	5.88335e+06	7.54936e+06	4.54572e+06	4.78657e+06	6.96234e+06
Hex2Cer(t45:2)	Hex2Cer	M+H	1030.78	18.587	C57 H108 O14 N1	4.44607e+06	7.15224e+06	8.09577e+06	6.16014e+06	1.59256e+06	4.47403e+06	7.84179e+06	3.92373e+06	5.32661e+06	5.05199e+06	5.03514e+06	5.23402e+06	6.41898e+06	2.00823e+06	5.42835e+06	5.54859e+06	4.97197e+06
Hex3Cer(d18:1_22:0)	Hex3Cer	M+H	1108.77	16.4146	C58 H110 O18 N1	2.15564e+06	3.15814e+06	3.64097e+06	3.72117e+06	2.7061e+06	1.7197e+06	4.65634e+06	6.11444e+06	1.05328e+06	882128	3.36573e+06	3.45051e+06	2.63958e+06	2.97862e+06	2.67977e+06	2.81828e+06	2.61411e+06
Hex3Cer(d18:1_24:1)	Hex3Cer	M+H	1134.79	16.3102	C60 H112 O18 N1	3.10819e+06	4.66213e+06	5.15765e+06	5.00437e+06	2.63096e+06	3.03868e+06	5.76613e+06	8.63247e+06	3.8781e+06	1.88379e+06	3.89122e+06	4.32218e+06	4.08514e+06	3.71573e+06	4.28542e+06	5.48964e+06	4.07361e+06
LBPA(18:1_18:1)	LBPA	M+NH4	792.575	12.179	C42 H83 O10 P1 N1	2.05574e+07	3.23839e+07	3.19625e+07	3.18578e+07	2.20894e+07	2.57781e+07	2.95098e+07	3.88581e+07	2.71484e+07	2.65573e+07	2.96758e+07	3.17375e+07	2.75499e+07	2.95888e+07	3.40775e+07	2.55134e+07	2.92556e+07
LBPA(18:1_18:2)	LBPA	M+NH4	790.559	11.1414	C42 H81 O10 P1 N1	5.36339e+07	6.98423e+07	6.05605e+07	7.41375e+07	4.66373e+07	8.96524e+07	1.34202e+08	7.85417e+07	8.61444e+07	6.5426e+07	6.94691e+07	6.80169e+07	7.28265e+07	5.8961e+07	5.5927e+07	7.73098e+07	7.43711e+07
LBPA(18:2_18:2)	LBPA	M+NH4	788.544	10.072	C42 H79 O10 P1 N1	1.51845e+07	1.72302e+07	1.2895e+07	1.5745e+07	1.00993e+07	2.76809e+07	4.41502e+07	2.01294e+07	2.65798e+07	1.73937e+07	1.76327e+07	1.80748e+07	1.63874e+07	1.80782e+07	1.74974e+07	1.73982e+07	1.60758e+07
LPC(13:0)	LPC	M+Na	476.275	3.483	C21 H44 O7 N1 P1 Na1	8.57686e+07	8.83368e+07	7.21709e+07	9.99782e+07	1.10512e+08	1.78361e+08	1.44167e+08	1.21493e+08	1.37953e+08	1.2815e+08	1.13145e+08	1.11518e+08	1.14869e+08	1.10767e+08	1.09442e+08	1.20064e+08	1.10046e+08
LPC(14:0)	LPC	M+H	468.308	2.08533	C22 H47 O7 N1 P1	1.04711e+08	1.43305e+08	1.31377e+08	2.29879e+08	1.75048e+08	3.26109e+08	3.21014e+08	2.67048e+08	3.29393e+08	1.70241e+08	2.145e+08	2.053e+08	1.99792e+08	1.98967e+08	1.99415e+08	2.00497e+08	1.98061e+08
LPC(14:0e)	LPC	M+H	454.329	2.58784	C22 H49 O6 N1 P1	559441	1.82301e+06	1.63333e+06	2.3396e+06	1.34666e+06	2.25229e+06	1.66606e+06	2.05452e+06	3.38772e+06	1.59669e+06	2.23489e+06	1.74278e+06	1.29271e+06	1.72968e+06	1.68384e+06	1.73627e+06	1.82414e+06
LPC(15:0)	LPC	M+Na	504.306	2.68187	C23 H48 O7 N1 P1 Na1	2.06391e+07	2.42912e+07	1.94185e+07	3.63146e+07	3.53298e+07	5.04514e+07	4.7104e+07	3.93596e+07	4.66799e+07	3.44218e+07	3.44112e+07	3.30994e+07	3.33656e+07	3.22378e+07	3.22564e+07	3.30456e+07	3.27951e+07
LPC(16:1)	LPC	M+H	494.324	2.17935	C24 H49 O7 N1 P1	9.04769e+08	2.86882e+08	2.71638e+08	3.95538e+08	2.99903e+08	6.40665e+08	4.25557e+08	4.92422e+08	2.12348e+09	3.18847e+08	3.60681e+08	4.01702e+08	3.70027e+08	3.39626e+08	3.78253e+08	3.83127e+08	3.68581e+08
LPC(16:2e)	LPC	M+H	478.329	3.33441	C24 H49 O6 N1 P1	2.24616e+07	2.1042e+07	2.30994e+07	3.9972e+07	4.32792e+07	5.0193e+07	5.99699e+07	4.00238e+07	3.79503e+07	2.12864e+07	2.97979e+07	3.04436e+07	2.56168e+07	3.5781e+07	3.27988e+07	3.10641e+07	2.43941e+07
LPC(17:0)	LPC	M+H	510.355	3.96973	C25 H53 O7 N1 P1	7.52444e+07	1.0281e+08	7.88147e+07	1.34672e+08	1.31388e+08	2.60442e+08	2.31644e+08	1.83901e+08	2.20926e+08	1.46526e+08	1.43351e+08	1.48369e+08	1.40984e+08	1.36117e+08	1.30266e+08	1.42102e+08	1.29668e+08
LPC(17:1)	LPC	M+H	508.34	2.65792	C25 H51 O7 N1 P1	2.3389e+07	2.72144e+07	2.47824e+07	4.3922e+07	3.25464e+07	2.08015e+08	3.09331e+07	4.18023e+07	5.40382e+07	2.86064e+07	3.17095e+07	3.21418e+07	3.38349e+07	3.26038e+07	3.32794e+07	3.43989e+07	3.92462e+07
LPC(18:0)	LPC	M+Na	546.353	5.02669	C26 H54 O7 N1 P1 Na1	2.1611e+09	2.17901e+09	2.00404e+09	2.62569e+09	2.68542e+09	4.3387e+09	3.59279e+09	2.93991e+09	3.59059e+09	3.38857e+09	2.81712e+09	2.78253e+09	2.83142e+09	2.8252e+09	2.77448e+09	2.82666e+09	2.84852e+09
LPC(18:0e)	LPC	M+H	510.392	5.91984	C26 H57 O6 N1 P1	3.76506e+07	4.39975e+07	3.60264e+07	4.65563e+07	3.78408e+07	7.18515e+07	8.88545e+07	6.22137e+07	6.47389e+07	4.887e+07	4.83157e+07	5.12205e+07	4.93074e+07	4.7194e+07	4.85235e+07	4.74875e+07	4.78786e+07
LPC(18:1e)	LPC	M+H	508.376	4.21521	C26 H55 O6 N1 P1	6.90221e+07	8.36149e+07	7.63198e+07	9.93073e+07	1.00479e+08	2.37454e+08	2.53908e+08	1.38136e+08	1.58246e+08	1.23326e+08	1.16149e+08	1.15167e+08	1.16335e+08	1.16965e+08	1.14238e+08	1.17575e+08	1.14594e+08
LPC(18:3e)	LPC	M+H	504.345	3.4854	C26 H51 O6 N1 P1	3.30732e+06	6896658	4.52813e+06	5.73386e+06	9.2615e+06	1.08327e+07	1.09633e+07	9.61798e+06	9.26075e+06	2.59663e+06	6.47715e+06	4.53501e+06	4.63799e+06	7.51661e+06	5.43161e+06	5.45865e+06	6.15812e+06
LPC(19:0)	LPC	M+H	538.387	5.61848	C27 H57 O7 N1 P1	4.40857e+07	4.93749e+07	4.09644e+07	6.53585e+07	6.03011e+07	1.29755e+08	9.15902e+07	9.41763e+07	1.19017e+08	8.66801e+07	7.11986e+07	7.36645e+07	7.29456e+07	7.33941e+07	7.27203e+07	7.19222e+07	7.22429e+07
LPC(19:1)	LPC	M+H	536.371	4.27866	C27 H55 O7 N1 P1	1.90448e+07	2.2938e+07	1.95855e+07	3.69494e+07	3.17108e+07	6.46692e+07	4.5071e+07	5.16239e+07	4.45975e+07	3.01418e+07	3.29112e+07	3.27641e+07	3.06678e+07	3.31988e+07	3.3536e+07	3.23089e+07	3.34254e+07
LPC(20:0e)	LPC	M+H	538.423	7.96245	C28 H61 O6 N1 P1	1.30816e+07	1.59427e+07	1.20352e+07	1.6954e+07	1.26503e+07	2.61127e+07	3.01116e+07	2.44285e+07	2.28153e+07	2.17714e+07	1.75939e+07	1.6626e+07	1.62764e+07	1.70747e+07	1.68095e+07	1.66211e+07	1.72198e+07
LPC(20:1)	LPC	M+H	550.387	5.19434	C28 H57 O7 N1 P1	3.1715e+08	3.67936e+08	3.14194e+08	5.84628e+08	4.91436e+08	6.90231e+08	4.68157e+08	8.44229e+08	6.52185e+08	4.38435e+08	4.91532e+08	4.70765e+08	4.52578e+08	4.59972e+08	4.61425e+08	4.63001e+08	4.56191e+08
LPC(20:1e)	LPC	M+H	536.407	6.06614	C28 H59 O6 N1 P1	1.94996e+06	2.57026e+06	2.30611e+06	3.15782e+06	2.91478e+06	6.0207e+06	7.6978e+06	4.17811e+06	4.75954e+06	4.23347e+06	3.62059e+06	3.62063e+06	3.23902e+06	3.56371e+06	3.5182e+06	3.65004e+06	3.65068e+06
LPC(20:2e)	LPC	M+H	534.392	4.53117	C28 H57 O6 N1 P1	1.82769e+06	2.38071e+06	2.02995e+06	2.38617e+06	2.32674e+06	4.40185e+06	6.88263e+06	4.24801e+06	3.09543e+06	2.43464e+06	3.44549e+06	2.61934e+06	2.76266e+06	2.91437e+06	2.77734e+06	2.97715e+06	2.81257e+06
LPC(20:3e)	LPC	M+H	532.376	5.92135	C28 H55 O6 N1 P1	2.1894e+06	2.66797e+06	2.1402e+06	2.70436e+06	2.29492e+06	5.91432e+06	6.08462e+06	3.92732e+06	4.69098e+06	3.32578e+06	2.87729e+06	2.92694e+06	2.64172e+06	2.97627e+06	2.80563e+06	3.23953e+06	2.88117e+06
LPC(20:4)	LPC	M+H	544.34	2.32142	C28 H51 O7 N1 P1	4.4281e+09	5.85353e+09	4.66314e+09	6.16573e+09	5.54453e+09	8.219e+09	8.55446e+09	7.59729e+09	8.67222e+09	5.31809e+09	6.03132e+09	6.00215e+09	5.99856e+09	6.05687e+09	5.8481e+09	5.91311e+09	5.86997e+09
LPC(20:4e)	LPC	M+H	530.361	4.23503	C28 H53 O6 N1 P1	7.25228e+06	7.97412e+06	6.93645e+06	1.14299e+07	1.58766e+07	6.35211e+07	5.2989e+07	1.6859e+07	3.60909e+07	2.11005e+07	1.75273e+07	1.70498e+07	1.66019e+07	1.65218e+07	1.58424e+07	1.6812e+07	1.53461e+07
LPC(22:0)	LPC	M+H	580.434	8.8192	C30 H63 O7 N1 P1	6.15916e+07	5.99846e+07	5.35163e+07	6.24627e+07	5.24656e+07	7.21311e+07	7.46729e+07	7.14809e+07	9.37135e+07	5.01688e+07	6.39263e+07	6.4565e+07	6.09767e+07	6.06662e+07	5.83986e+07	6.00067e+07	6.51199e+07
LPC(22:1)	LPC	M+H	578.418	7.22063	C30 H61 O7 N1 P1	2.96573e+07	3.54193e+07	3.16548e+07	4.89573e+07	3.79343e+07	4.57172e+07	3.99264e+07	5.85091e+07	4.85786e+07	3.0345e+07	4.28432e+07	4.03774e+07	3.97811e+07	3.85244e+07	4.00261e+07	3.87825e+07	4.13322e+07
LPC(22:2)	LPC	M+H	576.402	5.57391	C30 H59 O7 N1 P1	6.27636e+06	8.05666e+06	6.77086e+06	1.24297e+07	9.03477e+06	1.20094e+07	1.35963e+07	1.41649e+07	1.04836e+07	6.8371e+06	9.16492e+06	9.02905e+06	8.73145e+06	9.52896e+06	8.90938e+06	9.27302e+06	8.96521e+06
LPC(22:3)	LPC	M+H	574.387	4.27017	C30 H57 O7 N1 P1	3.415e+06	4.07247e+06	4.10032e+06	7.18768e+06	5.52608e+06	1.02101e+07	1.01167e+07	7.5384e+06	8.97467e+06	5.00063e+06	5.74777e+06	5.90775e+06	5.85657e+06	5.55858e+06	5.51983e+06	5.98219e+06	5.58313e+06
LPC(22:4)	LPC	M+H	572.371	3.33416	C30 H55 O7 N1 P1	2.02568e+07	2.91828e+07	3.07939e+07	5.58283e+07	4.82236e+07	7.21912e+07	8.36015e+07	4.79327e+07	5.40362e+07	4.0384e+07	4.39906e+07	4.30881e+07	4.57082e+07	4.03148e+07	4.18829e+07	4.39729e+07	4.22462e+07
LPC(22:6)	LPC	M+Na	590.322	2.18689	C30 H50 O7 N1 P1 Na1	6.86784e+08	8.52272e+08	6.84791e+08	8.96661e+08	9.9773e+08	1.1525e+09	1.17287e+09	9.76476e+08	1.46253e+09	9.87285e+08	9.69022e+08	9.74355e+08	9.60086e+08	9.80554e+08	9.59333e+08	9.69457e+08	9.71484e+08
LPC(23:0)	LPC	M+H	594.449	9.65164	C31 H65 O7 N1 P1	7.21925e+06	8.99323e+06	7.11604e+06	1.04053e+07	5.4229e+06	1.16743e+07	1.41182e+07	1.03879e+07	9.85818e+06	7.56688e+06	8.38481e+06	7.88964e+06	8.5604e+06	7.90293e+06	8.16818e+06	8.65122e+06	8.67237e+06
LPC(24:0)	LPC	M+H	608.465	10.4781	C32 H67 O7 N1 P1	5.32658e+07	6.12441e+07	4.88342e+07	7.00385e+07	4.53306e+07	8.8868e+07	1.09691e+08	7.69897e+07	1.00025e+08	5.41725e+07	6.57155e+07	6.3799e+07	6.10306e+07	6.39675e+07	6.0777e+07	6.63024e+07	6.65285e+07
LPC(24:1)	LPC	M+H	606.449	8.80501	C32 H65 O7 N1 P1	2.17177e+07	2.29713e+07	2.13227e+07	3.19868e+07	2.12641e+07	2.87249e+07	3.93134e+07	3.14284e+07	3.17266e+07	1.87078e+07	2.51928e+07	2.68582e+07	2.55133e+07	2.50485e+07	2.46405e+07	2.50363e+07	2.63271e+07
LPC(24:2)	LPC	M+H	604.434	7.55815	C32 H63 O7 N1 P1	2.90938e+06	3.40287e+06	3.32783e+06	5.03769e+06	3.73746e+06	5.10502e+06	6.13758e+06	6.45423e+06	4.14607e+06	2.70834e+06	4.20503e+06	4.30105e+06	3.78469e+06	4.14743e+06	3.7149e+06	4.09175e+06	3.91502e+06
LPC(26:0)	LPC	M+H	636.496	12.111	C34 H71 O7 N1 P1	677453	635882	443442	1.71011e+06	347321	2.04018e+06	3.18986e+06	1.38276e+06	2.83002e+06	714134	1.4934e+06	2.36468e+06	853017	979888	1.01795e+06	1.51722e+06	2.11982e+06
LPC(26:1)	LPC	M+H	634.481	10.4392	C34 H69 O7 N1 P1	1.28117e+06	1.49693e+06	1.50721e+06	2.29381e+06	1.61493e+06	2.94606e+06	4.39718e+06	2.37152e+06	3.23704e+06	1.57064e+06	1.99163e+06	2.07699e+06	2.23547e+06	1.82371e+06	1.68405e+06	1.96318e+06	1.95066e+06
LPC(32:0)	LPC	M+Na	742.572	14.9115	C40 H82 O7 N1 P1 Na1	1.07675e+08	1.12227e+08	1.16107e+08	1.27803e+08	9.34958e+07	1.01955e+08	1.43836e+08	1.31006e+08	1.03369e+08	1.06e+08	1.15926e+08	1.06782e+08	1.09183e+08	1.09801e+08	1.14622e+08	1.0605e+08	1.15699e+08
LPC(34:0)	LPC	M+Na	770.603	16.165	C42 H86 O7 N1 P1 Na1	3.12993e+07	3.50721e+07	2.75749e+07	3.34765e+07	1.6878e+07	3.49891e+07	5.05751e+07	4.77378e+07	3.51023e+07	2.71736e+07	3.06605e+07	3.1858e+07	2.99977e+07	3.11543e+07	2.9861e+07	3.17301e+07	3.10044e+07
LPC(36:0)	LPC	M+Na	798.635	17.39	C44 H90 O7 N1 P1 Na1	2.08408e+06	1.24294e+06	2.06645e+06	3.9104e+06	3.69952e+06	2.73278e+06	3.43631e+06	4.60518e+06	3.57804e+06	3.3563e+06	2.16603e+06	3.24868e+06	2.727e+06	3.50772e+06	3.03031e+06	2.25358e+06	116959
LPC(8:1e)	LPC	M+H	368.22	2.93809	C16 H35 O6 N1 P1	3.64499e+06	6.77893e+06	1.33741e+06	2.47528e+06	955556	1.66751e+06	218931	3.42635e+06	1.16221e+06	6.32342e+06	1.53563e+07	1.55757e+07	1.56027e+07	1.61146e+07	1.53207e+07	1.46331e+07	1.53757e+07
LPE(16:0e)	LPE	M+H	440.314	4.22175	C21 H47 O6 N1 P1	4.09728e+06	4.84188e+06	4.65828e+06	5.25562e+06	4.09814e+06	9.66841e+06	9.20828e+06	5.98661e+06	9.68913e+06	6.5728e+06	5.47696e+06	5.30849e+06	5.49574e+06	5.40822e+06	5.42837e+06	5.3803e+06	5.542e+06
LPE(18:0)	LPE	M+Na	504.306	5.27032	C23 H48 O7 N1 P1 Na1	1.72549e+08	1.55988e+08	1.18685e+08	1.89386e+08	2.3413e+08	5.58293e+08	3.95178e+08	2.76343e+08	3.47286e+08	2.76216e+08	2.39874e+08	2.30046e+08	2.2909e+08	2.26103e+08	2.34101e+08	2.32141e+08	2.24024e+08
LPE(18:1e)	LPE	M+H	466.329	4.44393	C23 H49 O6 N1 P1	1.53384e+06	1.86259e+06	1.76029e+06	1.97645e+06	2.00084e+06	4.16728e+06	4.11924e+06	2.78853e+06	2.98084e+06	2.56922e+06	2.32391e+06	2.2468e+06	2.29272e+06	2.44699e+06	2.3652e+06	2.44133e+06	2.16109e+06
LPE(22:6)	LPE	M+Na	548.275	2.29108	C27 H44 O7 N1 P1 Na1	5.9681e+07	5.85075e+07	4.7818e+07	5.86942e+07	6.97434e+07	1.0592e+08	9.7603e+07	6.86073e+07	7.31019e+07	7.2625e+07	6.63517e+07	7.13649e+07	7.1052e+07	6.70398e+07	6.84651e+07	7.50815e+07	6.84178e+07
LPG(18:0)	LPG	M+H	513.319	4.34399	C24 H50 O9 N0 P1	1.23159e+06	1.12274e+06	1.15883e+06	1.78877e+06	2.48294e+06	5.40958e+06	4.06505e+06	2.3973e+06	3.11801e+06	3.04052e+06	2.61867e+06	2.18234e+06	2.17163e+06	1.98636e+06	2.19622e+06	1.89635e+06	2.35253e+06
LPG(18:2)	LPG	M+H	509.287	2.16856	C24 H46 O9 N0 P1	4.05838e+06	2.73021e+06	2.55968e+06	5.28968e+06	8.08217e+06	1.46161e+07	1.07308e+07	5.95408e+06	5.6584e+06	6.61344e+06	7.27981e+06	7.08316e+06	6.70197e+06	5.60719e+06	6.55255e+06	5.96593e+06	6.06836e+06
LPG(20:3)	LPG	M+Na	557.285	1.97915	C26 H47 O9 N0 P1 Na1	1.89305e+06	2.48525e+06	2.01302e+06	2.26624e+06	1.58672e+06	3.89014e+06	3.3517e+06	4.03099e+06	3.21014e+06	1.76868e+06	2.35808e+06	2.29561e+06	2.23877e+06	2.36784e+06	2.37838e+06	2.65171e+06	2.58485e+06
LPI(18:0)	LPI	M+H	601.335	3.9735	C27 H54 O12 N0 P1	4.15106e+06	4.80487e+06	2.58362e+06	2.22306e+06	3.90044e+06	5.83385e+06	5.13191e+06	4.30728e+06	3.62773e+06	4.82359e+06	7.39824e+06	7.32185e+06	7.04556e+06	7.31288e+06	7.03892e+06	7.71915e+06	8.13196e+06
LPI(18:1)	LPI	M+Na	621.301	1.89816	C27 H51 O12 N0 P1 Na1	4.65057e+06	5.38108e+06	3.95168e+06	3.09083e+06	5.57636e+06	6.33817e+06	3.86907e+06	5.76274e+06	3.192e+06	6.83893e+06	8.18818e+06	8.22795e+06	7.66252e+06	7.6425e+06	7.65714e+06	7.95976e+06	8.01022e+06
LPS(20:3)	LPS	M+Na	570.28	1.85062	C26 H46 O9 N1 P1 Na1	2.19492e+06	2.50162e+06	1.63952e+06	1.42448e+06	2.17376e+06	1.86624e+06	1.30116e+06	3.10696e+06	1.53352e+06	1.99415e+06	3.00951e+06	2.74378e+06	2.99627e+06	2.79235e+06	2.87356e+06	2.58643e+06	2.96104e+06
LPS(22:6)	LPS	M+H	570.283	1.86247	C28 H45 O9 N1 P1	2.21109e+06	2.53202e+06	1.64415e+06	1.47836e+06	2.21291e+06	1.92613e+06	996877	3.17492e+06	1.54433e+06	2.04309e+06	3.0374e+06	2.8934e+06	3.02256e+06	2.83889e+06	3.01994e+06	2.74042e+06	3.09695e+06
MG(16:0)	MG	M+NH4	348.311	5.50727	C19 H42 O4 N1	1.28574e+06	1.60204e+06	1.11739e+06	1.3327e+06	1.32367e+06	2.20992e+06	2.0909e+06	1.33953e+06	1.53398e+06	1.68112e+06	2.1605e+06	2.20697e+06	2.07937e+06	2.37777e+06	2.20558e+06	2.24179e+06	2.06811e+06
MG(18:0)	MG	M+H	359.316	7.61419	C21 H43 O4	1.37394e+06	2.02083e+06	1.43393e+06	1.9435e+06	1.61071e+06	2.26796e+06	2.60997e+06	1.29022e+06	2.05586e+06	2.05898e+06	2.37862e+06	2.24233e+06	2.27853e+06	2.30854e+06	2.01661e+06	2.27031e+06	2.53599e+06
MG(18:2)	MG	M+H	355.284	4.367	C21 H39 O4	2.58745e+06	3.94367e+06	3.66958e+06	4.15893e+06	3.70027e+06	5.94176e+06	5.07902e+06	4.2033e+06	7.34161e+06	3.80011e+06	3.45122e+06	2.56347e+06	3.7294e+06	3.0693e+06	3.80016e+06	3.83123e+06	6.99024e+06
MG(18:3)	MG	M+H	353.269	1.706	C21 H37 O4	117219	116318	444366	378369	1.78263e+07	420236	0	108001	928833	179192	1.57682e+06	1.70276e+06	1.70435e+06	1.61748e+06	1.79604e+06	1.57953e+06	1.64464e+06
MG(18:4)	MG	M+H	351.253	1.726	C21 H35 O4	136951	513854	587949	817504	1.01405e+07	276933	81543.2	480649	646270	311237	1.46432e+06	808270	888849	1.23773e+06	1.03927e+06	1.01373e+06	860216
MG(19:1)	MG	M+H	371.316	7.83	C22 H43 O4	1.48214e+07	1.67006e+07	1.17503e+06	4.86842e+06	958279	1.26684e+07	8.2953e+06	5.90607e+06	6.35936e+07	9.01227e+06	1.09049e+07	1.05565e+07	1.5438e+07	1.37366e+07	1.49403e+07	1.09797e+07	1.07346e+07
MG(29:1)	MG	M+H	511.472	21.1778	C32 H63 O4	1.48286e+07	1.93923e+07	1.03384e+07	9.5756e+06	8.85586e+06	1.97231e+07	2.58573e+07	1.63334e+07	1.56147e+07	1.21943e+07	1.36499e+07	1.31481e+07	1.44573e+07	1.32264e+07	1.50118e+07	1.31578e+07	1.28731e+07
MG(34:0)	MG	M+NH4	600.593	18.3659	C37 H78 O4 N1	6.63867e+06	3.62127e+06	6.74345e+06	6.69606e+06	4.40001e+06	1.26287e+07	1.00179e+07	8.06903e+06	8.92361e+06	9.23036e+06	4.92236e+06	4.22606e+06	4.01605e+06	3.20901e+06	3.87546e+06	4.11734e+06	7.86003e+06
MG(34:1)	MG	M+NH4	598.577	17.459	C37 H76 O4 N1	8.00275e+06	1.13222e+07	1.12393e+07	1.01836e+07	1.03941e+07	2.14649e+07	2.28581e+07	9.23881e+06	2.01826e+07	1.67706e+07	1.28313e+07	1.19676e+07	1.10393e+07	1.12262e+07	1.12235e+07	1.10748e+07	1.11658e+07
MG(38:0)	MG	M+Na	661.611	18.35	C41 H82 O4 Na1	8.15127e+06	1.25055e+07	8.49092e+06	5.61009e+06	5.81864e+06	1.09817e+07	1.76137e+07	7.12737e+06	1.32983e+07	1.24557e+07	1.03714e+07	1.03035e+07	1.03406e+07	9.21025e+06	9.3991e+06	9.59895e+06	5.06846e+06
MG(38:1)	MG	M+NH4	654.639	19.0296	C41 H84 O4 N1	1.12786e+07	1.31695e+07	1.22348e+07	1.12298e+07	9.55486e+06	1.33478e+07	2.2093e+07	1.13323e+07	2.0572e+07	1.89672e+07	1.63773e+07	1.14839e+07	1.68459e+07	1.26335e+07	1.30224e+07	1.46176e+07	1.63397e+07
MePC(14:0e)	MePC	M+Na	504.306	2.91391	C23 H48 O7 N1 P1 Na1	2.9099e+07	3.3812e+07	2.51998e+07	3.57641e+07	2.88098e+07	6.20369e+07	4.99847e+07	5.76366e+07	5.8224e+07	3.21144e+07	4.04215e+07	4.12484e+07	4.00423e+07	4.05518e+07	3.99357e+07	3.84186e+07	4.00773e+07
MePC(14:1e)	MePC	M+Na	502.29	3.722	C23 H46 O7 N1 P1 Na1	3.39343e+07	3.95794e+07	3.29376e+07	5.1184e+07	5.5433e+07	1.13869e+08	7.30036e+07	8.20707e+07	7.79372e+07	5.50449e+07	5.94747e+07	5.93047e+07	5.88946e+07	5.54175e+07	5.44102e+07	5.81936e+07	5.52446e+07
MePC(15:3)	MePC	M+NH4	521.299	6.534	C24 H46 O8 N2 P1	355349	744313	454520	307273	203389	245330	1.13975e+06	207891	656290	517272	432158	538743	341708	430788	465342	484941	394931
MePC(16:1)	MePC	M+NH4	539.346	6.34079	C25 H52 O8 N2 P1	1.37995e+06	991087	721462	1.05368e+06	905714	1.80011e+06	1.84775e+06	2.62232e+06	1.84923e+06	1.00381e+06	1.24571e+06	1.17297e+06	1.30623e+06	1.07233e+06	1.22153e+06	1.20532e+06	1.18388e+06
MePC(17:0)	MePC	M+Na	560.332	1.65696	C26 H52 O8 N1 P1 Na1	1.76856e+07	3.0029e+07	9.08082e+06	1.20064e+07	1.98856e+07	2.90789e+07	1.56688e+07	1.58902e+07	1.81094e+07	2.35719e+07	2.38384e+07	1.03839e+07	2.29714e+07	2.35986e+07	8.82018e+06	9.4009e+06	2.10793e+07
MePC(17:1e)	MePC	M+Na	544.337	3.21826	C26 H52 O7 N1 P1 Na1	1.27223e+08	1.72475e+08	1.42538e+08	1.92119e+08	1.6126e+08	2.55099e+08	2.11758e+08	2.25085e+08	2.53472e+08	1.60559e+08	1.64379e+08	1.59836e+08	1.70468e+08	1.52186e+08	1.6957e+08	1.67621e+08	1.65447e+08
MePC(18:2)	MePC	M+NH4	565.361	6.549	C27 H54 O8 N2 P1	755998	720712	514230	719483	657925	718206	810383	1.75166e+06	1.58461e+06	350808	731013	817181	879696	873409	760868	827676	808028
MePC(18:4e)	MePC	M+Na	552.306	7.35614	C27 H48 O7 N1 P1 Na1	2.37952e+06	3.76835e+06	3.15338e+06	2.68953e+06	2.36086e+06	3.40771e+06	3.85778e+06	3.04225e+06	3.58682e+06	3.09245e+06	2.99284e+06	3.01249e+06	2.78191e+06	2.90094e+06	2.83393e+06	2.91947e+06	2.96984e+06
MePC(19:1e)	MePC	M+Na	572.369	3.013	C28 H56 O7 N1 P1 Na1	2.32967e+06	3.07311e+06	2.38961e+06	3.54077e+06	4.08305e+06	6.2692e+06	6.60612e+06	3.63686e+06	4.18374e+06	3.35703e+06	4.07185e+06	3.0707e+06	2.87366e+06	2.99059e+06	2.10655e+06	2.9213e+06	5.24901e+06
MePC(19:2)	MePC	M+NH4	579.377	8.284	C28 H56 O8 N2 P1	1.75331e+06	937269	839583	1.87019e+06	1.36321e+06	2.63183e+06	4.55507e+06	2.09666e+06	3.4282e+06	608902	1.32323e+06	1.24935e+06	1.46868e+06	1.33637e+06	1.389e+06	1.60054e+06	1.32577e+06
MePC(19:3)	MePC	M+Na	582.317	1.70099	C28 H50 O8 N1 P1 Na1	1.25762e+06	2.25892e+06	1.00332e+06	2.30483e+06	1.07563e+06	1.58085e+06	1.35294e+06	776770	4.56357e+06	1.96112e+06	1.60333e+06	1.55752e+06	1.25143e+06	1.2014e+06	1.46264e+06	1.40451e+06	1.09684e+06
MePC(19:3e)	MePC	M+Na	568.337	2.754	C28 H52 O7 N1 P1 Na1	7.8985e+07	1.22999e+08	7.91056e+07	1.74747e+08	1.34002e+08	3.15087e+08	2.1264e+08	2.48505e+08	3.40838e+08	1.17046e+08	1.77725e+08	1.65159e+08	1.51165e+08	1.50115e+08	1.35248e+08	1.47367e+08	1.48591e+08
MePC(19:4e)	MePC	M+Na	566.322	1.83783	C28 H50 O7 N1 P1 Na1	1.59141e+07	2.24161e+07	2.36547e+07	3.07363e+07	3.18174e+07	7.91548e+07	5.4004e+07	3.82656e+07	5.73671e+07	3.33492e+07	3.55004e+07	3.85821e+07	3.48104e+07	3.25284e+07	3.2922e+07	3.25877e+07	3.96211e+07
MePC(19:5e)	MePC	M+Na	564.306	1.91016	C28 H48 O7 N1 P1 Na1	5.77668e+06	9.38512e+06	7.66422e+06	1.2956e+07	1.26257e+07	2.91814e+07	1.46106e+07	2.10555e+07	2.738e+07	8.26258e+06	1.23614e+07	1.22844e+07	1.23578e+07	1.22005e+07	1.26597e+07	1.16045e+07	1.23102e+07
MePC(21:2e)	MePC	M+Na	598.384	3.45628	C30 H58 O7 N1 P1 Na1	3.32524e+06	5.63156e+06	2.88154e+06	4.72337e+06	4.3138e+06	5.74635e+06	5.77279e+06	4.53326e+06	6.80041e+06	4.51268e+06	3.57835e+06	4.48942e+06	3.03134e+06	4.18747e+06	4.49407e+06	4.22887e+06	5.09023e+06
MePC(21:3e)	MePC	M+Na	596.369	2.84904	C30 H56 O7 N1 P1 Na1	9.97727e+06	1.09377e+07	9.51975e+06	1.51677e+07	1.3056e+07	2.44873e+07	2.16852e+07	1.84531e+07	2.22773e+07	1.32319e+07	1.4089e+07	1.41409e+07	1.31833e+07	1.40147e+07	1.21472e+07	1.3348e+07	1.2683e+07
MePC(22:0)	MePC	M+NH4	625.455	3.541	C31 H66 O8 N2 P1	188960	626634	0	1.4667e+06	542991	1.74715e+06	911652	521909	2.3246e+06	535684	858917	521544	849914	449263	820816	716338	1.49947e+06
MePC(22:1)	MePC	M+NH4	623.439	2.63442	C31 H64 O8 N2 P1	0	288672	0	206895	3.03962e+06	6.85817e+06	4.54032e+06	2.5088e+06	3.84724e+06	649937	1.44152e+06	1.09187e+06	1.30825e+06	304242	1.26909e+06	931932	2.29971e+06
MePC(23:5e)	MePC	M+Na	620.369	3.722	C32 H56 O7 N1 P1 Na1	444747	1.14659e+06	1.23419e+06	1.05526e+06	977464	1.82599e+06	1.42229e+06	1.72277e+06	1.30826e+06	614597	644332	621297	610871	710401	703768	517661	340143
MePC(24:3)	MePC	M+Na	652.395	3.752	C33 H60 O8 N1 P1 Na1	902286	1.6586e+06	1.11168e+06	1.41084e+06	812334	2.41197e+06	2.61222e+06	1.30875e+06	1.57488e+06	1.67896e+06	1.22487e+06	1.14445e+06	1.22845e+06	1.09333e+06	1.01021e+06	1.32077e+06	1.28248e+06
MePC(24:4)	MePC	M+NH4	645.424	6.943	C33 H62 O8 N2 P1	1.66903e+06	2.50635e+06	1.7084e+06	1.484e+06	1.61055e+06	2.61978e+06	1.94182e+06	1.65887e+06	1.63765e+06	1.98195e+06	1.76273e+06	1.67479e+06	1.68814e+06	1.90227e+06	1.44276e+06	1.98662e+06	1.79182e+06
MePC(28:0)	MePC	M+Na	714.504	10.288	C37 H74 O8 N1 P1 Na1	1.0797e+07	1.01025e+07	7.60134e+06	1.0051e+07	4.49076e+06	9.71641e+06	1.46212e+07	9.78848e+06	1.24356e+07	6.35632e+06	8.42564e+06	7.94946e+06	8.01589e+06	7.62833e+06	7.64347e+06	8.48671e+06	8.36446e+06
MePC(29:0)	MePC	M+Na	728.52	12.836	C38 H76 O8 N1 P1 Na1	3.9073e+07	4.61928e+07	3.53581e+07	4.06581e+07	2.29493e+07	2.86804e+07	2.18287e+07	3.77981e+07	3.73785e+07	1.84889e+07	3.10483e+07	2.98747e+07	3.44241e+07	2.90203e+07	3.69484e+07	3.38444e+07	3.52581e+07
MePC(29:0e)	MePC	M+Na	714.541	11.095	C38 H78 O7 N1 P1 Na1	406716	3.12966e+06	2.08564e+06	281620	0	0	646868	0	538882	345351	0	575193	339546	597999	175648	448002	585764
MePC(30:0)	MePC	M+Na	742.536	13.4509	C39 H78 O8 N1 P1 Na1	4.42671e+09	5.05672e+09	4.33914e+09	4.65322e+09	3.39568e+09	5.06145e+09	4.69111e+09	5.64271e+09	4.70228e+09	3.66805e+09	4.49362e+09	4.25301e+09	4.41354e+09	4.36214e+09	4.31802e+09	4.24218e+09	4.4531e+09
MePC(30:4)	MePC	M+NH4	729.518	12.98	C39 H74 O8 N2 P1	1.81287e+06	1.61777e+06	4.40923e+06	2.42934e+06	1.54202e+06	2.14677e+06	1.81626e+06	1.87552e+06	5.0905e+06	1.99234e+06	4.56819e+06	1.33557e+06	1.91866e+06	849989	880781	3.03228e+06	3.11945e+06
MePC(30:4e)	MePC	M+Na	720.494	11.7948	C39 H72 O7 N1 P1 Na1	4.62463e+06	2.57487e+06	3.36658e+06	5.44456e+06	3.35464e+06	4.54796e+06	5.88124e+06	5.9965e+06	6.8773e+06	3.71607e+06	4.35946e+06	4.85455e+06	4.72333e+06	4.07661e+06	4.40167e+06	4.04805e+06	5.07873e+06
MePC(31:0)	MePC	M+Na	756.551	12.6263	C40 H80 O8 N1 P1 Na1	3.27962e+08	3.23302e+08	2.78107e+08	3.55173e+08	2.3185e+08	3.91142e+08	3.2401e+08	3.30798e+08	5.19681e+08	2.77968e+08	3.38691e+08	3.31624e+08	3.14554e+08	3.0495e+08	3.0854e+08	3.31821e+08	3.06226e+08
MePC(31:1)	MePC	M+Na	754.536	11.5686	C40 H78 O8 N1 P1 Na1	335641	332564	1.15028e+06	2.42908e+06	0	0	1.64092e+06	1.95679e+06	0	1.43465e+06	0	375102	0	2.96275e+06	210790	288930	239855
MePC(31:2)	MePC	M+Na	752.52	10.1937	C40 H76 O8 N1 P1 Na1	2.63129e+07	4.49784e+07	4.33345e+07	4.17367e+07	1.75143e+07	4.82719e+07	4.05732e+07	4.48079e+07	5.38285e+07	2.38272e+07	4.07085e+07	3.97673e+07	3.27793e+07	3.66689e+07	3.69924e+07	4.00847e+07	3.62647e+07
MePC(31:4e)	MePC	M+Na	734.51	12.5274	C40 H74 O7 N1 P1 Na1	1.13123e+07	9.12943e+06	6.0239e+06	1.10209e+07	7.04229e+06	1.2406e+07	1.15937e+07	1.1883e+07	1.3058e+07	1.09377e+07	1.30724e+07	1.20901e+07	8.33747e+06	9.58152e+06	8.64328e+06	9.49749e+06	9.84261e+06
MePC(32:0)	MePC	M+Na	770.567	12.8908	C41 H82 O8 N1 P1 Na1	5.1516e+07	5.34669e+07	4.35786e+07	4.96518e+07	4.84929e+07	4.85749e+07	3.66297e+07	5.12402e+07	5.31465e+07	4.0752e+07	4.42674e+07	4.4168e+07	4.09283e+07	4.49771e+07	3.98873e+07	4.37174e+07	4.38288e+07
MePC(32:1)	MePC	M+Na	768.551	11.9633	C41 H80 O8 N1 P1 Na1	1.28137e+09	1.4083e+09	1.18918e+09	1.57532e+09	1.00952e+09	1.38715e+09	1.54908e+09	1.34455e+09	1.72239e+09	1.43791e+09	1.30427e+09	1.32043e+09	1.33547e+09	1.3357e+09	1.29621e+09	1.29161e+09	1.32023e+09
MePC(32:2)	MePC	M+NH4	761.58	12.9723	C41 H82 O8 N2 P1	1.6052e+09	1.58884e+09	1.50337e+09	1.56598e+09	1.40098e+09	1.67782e+09	2.01659e+09	1.67508e+09	2.04551e+09	1.7299e+09	1.66292e+09	1.74622e+09	1.69815e+09	1.56132e+09	1.67359e+09	1.57273e+09	1.61092e+09
MePC(32:3)	MePC	M+NH4	759.565	11.94	C41 H80 O8 N2 P1	5.60044e+07	3.5749e+07	2.86746e+07	5.27722e+07	5.65483e+07	5.22837e+07	1.00709e+08	8.82524e+07	1.13156e+08	7.00358e+07	4.36423e+07	4.34304e+07	4.74077e+07	4.36235e+07	6.82426e+07	6.52092e+07	6.90764e+07
MePC(32:3e)	MePC	M+Na	750.541	13.778	C41 H78 O7 N1 P1 Na1	5.37627e+08	6.73148e+08	6.849e+08	8.33143e+08	5.31002e+08	9.2056e+08	1.06377e+09	8.94346e+08	8.50405e+08	6.1804e+08	6.83147e+08	7.02518e+08	6.72536e+08	6.86449e+08	6.62866e+08	7.01097e+08	6.77525e+08
MePC(32:4)	MePC	M+Na	762.504	13.1091	C41 H74 O8 N1 P1 Na1	6.40447e+07	6.79381e+07	5.63692e+07	5.52482e+07	6.51629e+07	6.02734e+07	6.30716e+07	5.52405e+07	6.24067e+07	7.65103e+07	5.74865e+07	6.28932e+07	6.06031e+07	6.49835e+07	6.25251e+07	6.1314e+07	6.29478e+07
MePC(32:5)	MePC	M+Na	760.489	11.6391	C41 H72 O8 N1 P1 Na1	2.18657e+07	2.63791e+07	3.33017e+07	2.83284e+07	2.66704e+07	4.11413e+07	3.01825e+07	3.05019e+07	4.06697e+07	3.25882e+07	3.18921e+07	3.76051e+07	3.24652e+07	2.99917e+07	3.03201e+07	2.88808e+07	2.88883e+07
MePC(32:5e)	MePC	M+Na	746.51	13.7769	C41 H74 O7 N1 P1 Na1	3.42255e+07	3.79102e+07	4.41818e+07	4.95351e+07	4.14632e+07	4.11381e+07	5.27735e+07	4.29119e+07	3.64742e+07	2.8724e+07	5.42886e+07	4.08032e+07	4.07324e+07	4.37518e+07	3.6018e+07	4.34027e+07	4.0541e+07
MePC(32:6)	MePC	M+NH4	753.518	11.476	C41 H74 O8 N2 P1	1.35588e+08	1.61369e+08	1.62828e+08	1.49785e+08	1.0428e+08	1.52683e+08	1.80649e+08	1.44998e+08	1.64388e+08	1.23769e+08	1.4278e+08	1.51593e+08	1.49373e+08	1.46211e+08	1.53062e+08	1.45609e+08	1.51717e+08
MePC(32:8e)	MePC	M+NH4	735.507	16.3005	C41 H72 O7 N2 P1	9.06766e+06	7.94716e+06	6.54616e+06	7.94085e+06	7.30147e+06	1.11133e+07	9.26021e+06	8.29143e+06	8.51631e+06	1.01484e+07	9.20932e+06	8.42989e+06	8.53045e+06	9.74283e+06	8.25001e+06	8.50361e+06	7.9828e+06
MePC(33:0)	MePC	M+Na	784.583	15.3575	C42 H84 O8 N1 P1 Na1	1.11961e+08	1.20061e+08	1.37134e+08	1.37433e+08	1.04149e+08	1.14399e+08	1.47318e+08	1.17979e+08	1.30672e+08	1.17858e+08	1.1956e+08	1.16849e+08	1.21725e+08	1.18158e+08	1.19461e+08	1.12429e+08	1.14731e+08
MePC(33:1)	MePC	M+Na	782.567	12.7068	C42 H82 O8 N1 P1 Na1	3.77358e+10	3.98801e+10	3.69098e+10	3.77964e+10	3.67851e+10	4.13885e+10	4.1035e+10	3.81346e+10	4.22638e+10	3.88468e+10	3.78576e+10	3.8112e+10	3.78732e+10	3.74389e+10	3.77434e+10	3.79374e+10	3.81211e+10
MePC(33:1e)	MePC	M+Na	768.588	13.545	C42 H84 O7 N1 P1 Na1	1.06296e+09	1.29481e+09	1.25904e+09	1.24082e+09	8.81389e+08	1.44494e+09	2.53876e+09	1.4058e+09	1.3868e+09	1.10254e+09	1.30387e+09	1.1965e+09	1.2244e+09	1.10722e+09	1.21802e+09	1.18033e+09	1.1947e+09
MePC(33:2)	MePC	M+Na	780.551	11.702	C42 H80 O8 N1 P1 Na1	6.33489e+09	7.04745e+09	6.53299e+09	7.94768e+09	6.14599e+09	9.62651e+09	7.21274e+09	9.58469e+09	9.94183e+09	6.4026e+09	7.26279e+09	7.74402e+09	7.55419e+09	7.62342e+09	7.48052e+09	7.76269e+09	7.71028e+09
MePC(33:2e)	MePC	M+Na	766.572	13.3107	C42 H82 O7 N1 P1 Na1	9.1199e+08	1.12862e+09	2.79723e+08	2.58171e+08	2.04986e+08	9.86141e+08	3.6436e+08	9.71894e+08	2.02857e+08	1.37412e+08	1.84116e+08	1.92459e+08	1.77219e+08	1.81422e+08	1.98452e+08	2.03172e+08	1.84849e+08
MePC(33:3)	MePC	M+Na	778.536	11.5935	C42 H78 O8 N1 P1 Na1	2.27104e+08	1.39035e+08	2.40713e+08	2.18911e+08	2.3953e+08	1.64748e+08	2.01205e+08	1.86195e+08	2.03746e+08	2.05339e+08	2.16726e+08	2.24689e+08	2.21462e+08	2.20264e+08	2.19087e+08	2.28043e+08	2.05026e+08
MePC(33:4)	MePC	M+Na	776.52	10.5671	C42 H76 O8 N1 P1 Na1	4.46197e+07	4.57074e+07	3.43161e+07	5.27136e+07	3.70292e+07	8.10093e+07	8.11419e+07	5.00381e+07	9.7715e+07	3.97351e+07	5.30657e+07	4.81313e+07	4.40622e+07	4.93742e+07	4.3242e+07	4.48815e+07	4.79182e+07
MePC(33:5)	MePC	M+NH4	769.549	14.2648	C42 H78 O8 N2 P1	1.30043e+08	2.01096e+08	1.87148e+08	1.6427e+08	1.4152e+08	2.01441e+08	2.4738e+08	1.83627e+08	1.88553e+08	1.6413e+08	1.77226e+08	1.58744e+08	1.83885e+08	1.70251e+08	1.7369e+08	1.66916e+08	1.71948e+08
MePC(33:6)	MePC	M+NH4	767.533	13.1811	C42 H76 O8 N2 P1	3.23983e+09	3.84255e+09	3.52224e+09	3.41043e+09	2.84848e+09	4.00481e+09	3.59533e+09	4.0143e+09	3.5838e+09	3.26433e+09	3.56151e+09	3.44017e+09	3.49891e+09	3.34025e+09	3.28548e+09	3.33407e+09	3.48178e+09
MePC(33:8)	MePC	M+Na	768.457	7.15669	C42 H68 O8 N1 P1 Na1	936746	592552	1.16331e+06	1.93794e+06	2.52532e+06	3.39794e+06	2.16202e+06	1.45132e+06	1.23565e+06	1.80411e+06	1.57472e+06	1.45652e+06	2.04567e+06	1.869e+06	1.77391e+06	1.62728e+06	1.93952e+06
MePC(34:0)	MePC	M+Na	798.598	15.7523	C43 H86 O8 N1 P1 Na1	1.44806e+08	1.7644e+08	1.27001e+08	1.52707e+08	9.57289e+07	1.4176e+08	6.45374e+07	1.49931e+08	1.54146e+08	1.00694e+08	1.39546e+08	1.35855e+08	1.34681e+08	1.30395e+08	1.26306e+08	1.29447e+08	1.26899e+08
MePC(34:1)	MePC	M+Na	796.583	13.3665	C43 H84 O8 N1 P1 Na1	2.80409e+09	3.11466e+09	2.53002e+09	2.76073e+09	2.35943e+09	2.89554e+09	3.3633e+09	2.65759e+09	3.1677e+09	2.76089e+09	2.74691e+09	2.64901e+09	2.68162e+09	2.76306e+09	2.7138e+09	2.71329e+09	2.70486e+09
MePC(34:2)	MePC	M+Na	794.567	14.975	C43 H82 O8 N1 P1 Na1	4.83561e+08	4.96695e+08	4.45371e+08	5.14211e+08	4.31743e+08	7.57644e+08	8.81376e+08	6.35111e+08	6.10987e+08	5.33509e+08	5.33761e+08	5.24993e+08	5.53099e+08	5.22168e+08	4.96066e+08	5.24027e+08	5.12398e+08
MePC(34:3)	MePC	M+NH4	787.596	13.071	C43 H84 O8 N2 P1	3.08946e+08	3.58987e+08	3.28949e+08	3.44764e+08	2.98563e+08	2.90386e+08	2.67528e+08	3.63944e+08	2.83404e+08	2.35777e+08	2.91324e+08	2.98183e+08	3.14082e+08	2.88097e+08	2.94398e+08	3.01141e+08	3.0003e+08
MePC(34:3e)	MePC	M+Na	778.572	12.3819	C43 H82 O7 N1 P1 Na1	5.5915e+06	5.57788e+06	6.42287e+06	6.33095e+06	4.19728e+06	7.24756e+06	8.74188e+06	4.88231e+06	9.97714e+06	8.77978e+06	6.66518e+06	7.57316e+06	7.91928e+06	6.54906e+06	6.72143e+06	9.38073e+06	8.95289e+06
MePC(34:4)	MePC	M+NH4	785.58	11.8768	C43 H82 O8 N2 P1	5.46526e+08	5.64577e+08	4.59856e+08	5.07656e+08	4.36875e+08	6.97229e+08	6.41438e+08	6.10892e+08	6.92477e+08	5.49509e+08	5.77373e+08	5.89122e+08	5.45326e+08	5.06446e+08	5.41677e+08	5.06333e+08	5.54071e+08
MePC(34:4e)	MePC	M+Na	776.556	14.6657	C43 H80 O7 N1 P1 Na1	3.3768e+08	3.71849e+08	3.53028e+08	4.12479e+08	2.67125e+08	3.82942e+08	5.7467e+08	3.89534e+08	3.58568e+08	2.82219e+08	3.54864e+08	3.50159e+08	3.54627e+08	3.38977e+08	3.55161e+08	3.48654e+08	3.34783e+08
MePC(34:5)	MePC	M+Na	788.52	11.5626	C43 H76 O8 N1 P1 Na1	9.86483e+08	1.04077e+09	8.16698e+08	7.84244e+08	7.8524e+08	1.72571e+09	1.32797e+09	1.1281e+09	1.23163e+09	9.47114e+08	1.06291e+09	1.05484e+09	1.03725e+09	1.03261e+09	9.91012e+08	1.04847e+09	1.01379e+09
MePC(34:5e)	MePC	M+Na	774.541	15.1155	C43 H78 O7 N1 P1 Na1	5.44185e+07	5.48048e+07	6.1006e+07	6.88045e+07	4.41707e+07	5.42435e+07	7.2421e+07	5.66113e+07	5.12409e+07	4.8875e+07	5.64598e+07	5.52173e+07	5.37567e+07	5.68456e+07	6.03722e+07	5.62979e+07	5.35839e+07
MePC(34:6)	MePC	M+Na	786.504	12.5946	C43 H74 O8 N1 P1 Na1	9.46443e+07	8.5618e+07	1.00016e+08	8.60496e+07	9.65547e+07	6.72665e+07	5.2525e+07	8.09676e+07	5.87084e+07	9.71527e+07	9.6163e+07	1.00143e+08	9.25106e+07	1.00638e+08	9.90141e+07	9.19225e+07	1.04643e+08
MePC(34:7)	MePC	M+NH4	779.533	11.9187	C43 H76 O8 N2 P1	5.15459e+07	4.87392e+07	4.56479e+07	1.03442e+08	4.81133e+07	9.67321e+07	1.12365e+08	1.16229e+08	1.15384e+08	7.82803e+07	7.47033e+07	7.17137e+07	7.3701e+07	7.41175e+07	7.82963e+07	7.74952e+07	7.48408e+07
MePC(34:8)	MePC	M+NH4	777.518	11.2685	C43 H74 O8 N2 P1	1.56563e+07	2.12097e+07	2.29917e+07	2.80069e+07	2.23524e+07	1.80754e+07	2.59447e+07	1.82537e+07	3.00407e+07	1.90992e+07	2.06383e+07	2.11409e+07	2.21493e+07	1.90998e+07	2.28645e+07	2.36719e+07	2.42823e+07
MePC(34:8e)	MePC	M+Na	768.494	11.4666	C43 H72 O7 N1 P1 Na1	1.13179e+07	1.03498e+07	1.09638e+07	1.53524e+07	8.9723e+06	1.38951e+07	1.41861e+07	1.09186e+07	1.35553e+07	1.07096e+07	1.15094e+07	1.14429e+07	1.19736e+07	1.14511e+07	1.20735e+07	1.17714e+07	1.23897e+07
MePC(35:0)	MePC	M+Na	812.614	16.562	C44 H88 O8 N1 P1 Na1	1.40936e+07	2.17305e+07	2.08853e+07	1.6425e+07	1.58921e+07	1.63285e+07	1.43371e+07	4.79559e+07	1.8903e+07	1.2493e+07	1.3435e+07	1.30103e+07	2.12e+07	1.5571e+07	1.49573e+07	1.61336e+07	1.22616e+07
MePC(35:0e)	MePC	M+Na	798.635	15.5181	C44 H90 O7 N1 P1 Na1	1.77658e+07	2.22512e+07	1.59758e+07	1.65772e+07	1.22878e+07	2.23499e+07	3.11342e+07	2.31398e+07	2.27403e+07	1.60065e+07	1.78704e+07	1.78271e+07	1.79951e+07	1.7311e+07	1.59371e+07	1.78402e+07	1.67509e+07
MePC(35:1)	MePC	M+Na	810.598	14.1191	C44 H86 O8 N1 P1 Na1	2.01677e+10	2.20681e+10	1.97095e+10	1.82601e+10	1.92144e+10	2.24585e+10	2.16441e+10	2.09832e+10	2.27676e+10	2.222e+10	2.05201e+10	2.03081e+10	1.98554e+10	1.99591e+10	1.9766e+10	1.97717e+10	1.98199e+10
MePC(35:1e)	MePC	M+Na	796.619	14.2295	C44 H88 O7 N1 P1 Na1	1.44129e+07	1.38681e+07	1.67295e+07	1.83418e+07	1.05274e+07	1.74528e+07	2.37987e+07	1.61829e+07	1.80698e+07	1.14116e+07	1.69614e+07	1.58481e+07	1.24018e+07	1.63931e+07	1.74678e+07	1.33723e+07	1.46768e+07
MePC(35:2)	MePC	M+Na	808.583	14.29	C44 H84 O8 N1 P1 Na1	5.40648e+08	5.07094e+08	5.58887e+08	5.21364e+08	6.36867e+08	4.9642e+08	4.91411e+08	4.69615e+08	5.08704e+08	5.61204e+08	5.26872e+08	5.44068e+08	5.39527e+08	5.34341e+08	5.3662e+08	5.33392e+08	5.36217e+08
MePC(35:2e)	MePC	M+Na	794.603	13.58	C44 H86 O7 N1 P1 Na1	1.11118e+09	1.44882e+09	1.29199e+09	1.28705e+09	9.98905e+08	1.74289e+09	2.36513e+09	1.58602e+09	1.55876e+09	1.33433e+09	1.41416e+09	1.37177e+09	1.34634e+09	1.28427e+09	1.32127e+09	1.33524e+09	1.32442e+09
MePC(35:3)	MePC	M+Na	806.567	12.2361	C44 H82 O8 N1 P1 Na1	4.71632e+10	4.86321e+10	4.51108e+10	4.81593e+10	4.42292e+10	5.53053e+10	5.62681e+10	5.02654e+10	5.34358e+10	5.06801e+10	4.9026e+10	4.9185e+10	4.80059e+10	4.8929e+10	4.84712e+10	4.82193e+10	4.87809e+10
MePC(35:3e)	MePC	M+Na	792.588	13.1178	C44 H84 O7 N1 P1 Na1	1.36612e+08	1.96634e+08	2.07252e+08	1.58133e+08	1.29287e+08	1.58995e+08	3.1476e+08	1.6235e+08	2.04945e+08	1.49646e+08	1.75079e+08	1.52715e+08	1.66521e+08	1.60442e+08	1.72156e+08	1.69154e+08	1.65162e+08
MePC(35:4)	MePC	M+Na	804.551	12.4762	C44 H80 O8 N1 P1 Na1	5.67505e+07	5.89176e+07	6.57513e+07	6.92195e+07	5.11083e+07	5.61266e+07	4.71236e+07	5.74444e+07	5.43437e+07	5.65456e+07	5.62086e+07	6.03753e+07	5.64645e+07	5.90731e+07	6.00132e+07	5.86373e+07	5.75313e+07
MePC(35:5)	MePC	M+Na	802.536	11.3325	C44 H78 O8 N1 P1 Na1	4.82622e+08	5.34204e+08	5.29904e+08	5.23656e+08	4.77926e+08	4.92231e+08	4.55486e+08	5.03758e+08	5.00934e+08	4.80657e+08	5.19352e+08	5.13471e+08	5.21093e+08	5.09849e+08	5.10933e+08	5.09887e+08	5.15652e+08
MePC(35:6)	MePC	M+Na	800.52	10.051	C44 H76 O8 N1 P1 Na1	9.71347e+06	7.89934e+06	6.95803e+06	9.79748e+06	5.10752e+06	1.47067e+07	1.62713e+07	1.09607e+07	1.76386e+07	2.42203e+06	6.46593e+06	6.36037e+06	8.20151e+06	8.62762e+06	8.90309e+06	6.59193e+06	8.39527e+06
MePC(36:0)	MePC	M+Na	826.63	15.62	C45 H90 O8 N1 P1 Na1	6.24208e+07	4.2228e+07	4.86958e+07	6.45274e+07	2.84332e+07	1.07692e+07	1.99144e+07	5.45109e+07	6.66798e+07	8.65705e+06	5.51815e+07	5.04224e+07	5.1045e+07	5.59958e+07	5.91713e+07	5.18192e+07	4.73709e+07
MePC(36:1)	MePC	M+Na	824.614	14.747	C45 H88 O8 N1 P1 Na1	1.70938e+09	2.08693e+09	1.64193e+09	1.80233e+09	1.29897e+09	1.52044e+09	1.61926e+09	1.81874e+09	1.80246e+09	1.46888e+09	1.61262e+09	1.64647e+09	1.61682e+09	1.53872e+09	1.51457e+09	1.64315e+09	1.5693e+09
MePC(36:10)	MePC	M+NH4	801.518	10.0405	C45 H74 O8 N2 P1	3.02924e+06	4.58255e+06	3.18439e+06	4.02583e+06	2.82243e+06	7.79776e+06	5.00417e+06	4.57286e+06	8.23272e+06	2.04857e+06	3.59038e+06	4.00418e+06	2.7826e+06	3.80331e+06	3.73219e+06	3.29554e+06	3.60826e+06
MePC(36:1e)	MePC	M+Na	810.635	17.313	C45 H90 O7 N1 P1 Na1	1.46195e+06	815423	1.2514e+06	4.4393e+06	1.11334e+06	6.63805e+06	3.7605e+06	3.3365e+06	4.72818e+06	3.76057e+06	3.82453e+06	4.05013e+06	2.49342e+06	3.17419e+06	1.25802e+06	1.757e+06	4.12393e+06
MePC(36:2)	MePC	M+NH4	817.643	16.5583	C45 H90 O8 N2 P1	4.85772e+08	5.24251e+08	4.5256e+08	5.42618e+08	3.78591e+08	5.36593e+08	4.1997e+08	6.04556e+08	5.98958e+08	4.34526e+08	4.87853e+08	5.01296e+08	4.79962e+08	4.89586e+08	4.90003e+08	4.75825e+08	4.82693e+08
MePC(36:3)	MePC	M+NH4	815.627	14.6803	C45 H88 O8 N2 P1	4.04221e+08	4.47695e+08	4.24283e+08	4.83428e+08	3.77312e+08	5.75648e+08	4.54319e+08	5.64497e+08	5.6887e+08	4.59952e+08	4.59158e+08	4.6213e+08	4.59424e+08	4.58893e+08	4.44313e+08	4.47796e+08	4.5993e+08
MePC(36:3e)	MePC	M+Na	806.603	16.1395	C45 H86 O7 N1 P1 Na1	2.30334e+07	3.04203e+07	2.10025e+07	2.79772e+07	1.98077e+07	5.04227e+07	6.08929e+07	3.73017e+07	4.14933e+07	3.32594e+07	3.13518e+07	2.95065e+07	3.11124e+07	3.47666e+07	3.03355e+07	3.28107e+07	3.19267e+07
MePC(36:4)	MePC	M+NH4	813.612	14.12	C45 H86 O8 N2 P1	5.51086e+08	5.9788e+08	5.49647e+08	4.76203e+08	5.51271e+08	5.91254e+08	6.19425e+08	5.53039e+08	6.12795e+08	6.20659e+08	5.80061e+08	5.43688e+08	5.38234e+08	5.28448e+08	5.29366e+08	5.19619e+08	5.3941e+08
MePC(36:4e)	MePC	M+Na	804.588	13.5557	C45 H84 O7 N1 P1 Na1	6.36109e+06	8.44156e+06	3.54316e+06	6.93103e+06	4.90893e+06	8.00083e+06	7.96251e+06	6.91212e+06	8.32017e+06	6.26089e+06	4.78115e+06	6.88356e+06	4.63447e+06	6.31171e+06	5.78558e+06	5.02013e+06	5.81607e+06
MePC(36:5)	MePC	M+Na	816.551	10.5255	C45 H80 O8 N1 P1 Na1	1.64811e+07	2.47122e+07	1.89794e+07	1.84754e+07	1.40191e+07	2.35047e+07	1.88544e+07	1.83913e+07	2.2112e+07	1.39576e+07	1.60501e+07	1.90204e+07	1.66872e+07	1.76845e+07	1.74792e+07	1.57719e+07	1.67366e+07
MePC(36:5e)	MePC	M+Na	802.572	16.3478	C45 H82 O7 N1 P1 Na1	9.67681e+06	1.01522e+07	9.74315e+06	1.10114e+07	7.30814e+06	1.32934e+07	1.79236e+07	1.65838e+07	1.05868e+07	1.0959e+07	1.25467e+07	1.08301e+07	1.1339e+07	1.32008e+07	1.15913e+07	9.98923e+06	1.09416e+07
MePC(36:6)	MePC	M+NH4	809.58	14.2908	C45 H82 O8 N2 P1	2.61754e+08	2.27737e+08	2.59909e+08	2.55073e+08	2.94138e+08	2.25677e+08	2.34437e+08	2.21731e+08	2.3382e+08	2.61838e+08	2.6443e+08	2.53542e+08	2.48529e+08	2.56456e+08	2.57007e+08	2.47234e+08	2.53577e+08
MePC(36:6e)	MePC	M+Na	800.556	13.509	C45 H80 O7 N1 P1 Na1	890596	1.61603e+06	2.70194e+06	3.71302e+06	1.94311e+06	3.38853e+06	8.62116e+06	5.1277e+06	1.51821e+06	2.45553e+06	3.24181e+06	996180	4.37832e+06	3.54023e+06	2.21235e+06	2.2088e+06	1.84505e+06
MePC(36:7)	MePC	M+NH4	807.565	13.5438	C45 H80 O8 N2 P1	6.73401e+07	6.0484e+07	6.16135e+07	6.69506e+07	8.44399e+07	5.74061e+07	4.89685e+07	5.77113e+07	6.69943e+07	7.7501e+07	6.69532e+07	7.26559e+07	6.32642e+07	6.22738e+07	6.34967e+07	6.36961e+07	6.15544e+07
MePC(36:7e)	MePC	M+Na	798.541	14.633	C45 H78 O7 N1 P1 Na1	1.25141e+07	1.13961e+07	1.48206e+07	1.20221e+07	1.20442e+07	4.41746e+06	1.52375e+07	7.92364e+06	6.46258e+06	9.08817e+06	1.04635e+07	1.14298e+07	1.17058e+07	1.04065e+07	1.1417e+07	9.86128e+06	9.21208e+06
MePC(36:8)	MePC	M+Na	810.504	11.533	C45 H74 O8 N1 P1 Na1	3.95291e+07	4.33742e+07	3.02537e+07	2.61697e+07	3.48425e+07	5.32216e+07	4.34728e+07	3.50723e+07	3.29662e+07	3.8336e+07	3.95699e+07	3.80578e+07	3.60071e+07	3.18877e+07	3.33843e+07	3.58285e+07	3.76546e+07
MePC(36:9)	MePC	M+NH4	803.533	11.7036	C45 H76 O8 N2 P1	1.24777e+08	1.07299e+08	1.24304e+08	1.24974e+08	1.47794e+08	1.20471e+08	1.22932e+08	1.33617e+08	1.26157e+08	1.35296e+08	1.29278e+08	1.35177e+08	1.32572e+08	1.33298e+08	1.33785e+08	1.32364e+08	1.29666e+08
MePC(37:0)	MePC	M+Na	840.645	16.3399	C46 H92 O8 N1 P1 Na1	8.45106e+06	1.05929e+07	9.70984e+06	8.40073e+06	6.83818e+06	1.11469e+07	5.06717e+06	1.22473e+07	1.57125e+07	6.51255e+06	7.31953e+06	8.78806e+06	9.51247e+06	7.57886e+06	9.07412e+06	7.98279e+06	6.91506e+06
MePC(37:0e)	MePC	M+Na	826.666	16.561	C46 H94 O7 N1 P1 Na1	6.22446e+06	7.29579e+06	5.41199e+06	7.25784e+06	3.73619e+06	6.82882e+06	1.23177e+07	7.32098e+06	8.01261e+06	4.84318e+06	5.49518e+06	6.08399e+06	5.19573e+06	4.03237e+06	6.21876e+06	6.56337e+06	6.46755e+06
MePC(37:1)	MePC	M+Na	838.63	14.634	C46 H90 O8 N1 P1 Na1	5.51503e+08	3.8762e+08	5.50702e+08	7.63051e+08	4.79996e+08	4.34849e+08	4.45753e+08	6.50288e+08	4.9531e+08	5.07415e+08	5.2894e+08	3.75183e+08	6.02534e+08	5.40134e+08	5.41722e+08	5.19444e+08	5.24013e+08
MePC(37:1e)	MePC	M+Na	824.65	15.5631	C46 H92 O7 N1 P1 Na1	4.27558e+07	5.65181e+07	5.81314e+07	6.56045e+07	3.54396e+07	5.62198e+07	1.32398e+08	6.21046e+07	5.91862e+07	4.45494e+07	5.67718e+07	5.67206e+07	5.09568e+07	5.93103e+07	5.28005e+07	5.35785e+07	5.1474e+07
MePC(37:2)	MePC	M+Na	836.614	14.6144	C46 H88 O8 N1 P1 Na1	1.37988e+09	1.46398e+09	1.31897e+09	1.46491e+09	1.23308e+09	1.42011e+09	1.74509e+09	1.68325e+09	1.35212e+09	1.6873e+09	1.43347e+09	1.40123e+09	1.47089e+09	1.47505e+09	1.47904e+09	1.42207e+09	1.4564e+09
MePC(37:2e)	MePC	M+Na	822.635	15.641	C46 H90 O7 N1 P1 Na1	2.07386e+07	2.24796e+07	2.24492e+07	2.70139e+07	1.69386e+07	3.19284e+07	3.01915e+07	2.65619e+07	1.84222e+07	2.41293e+07	2.7678e+07	2.32076e+07	2.06132e+07	2.06681e+07	1.76123e+07	2.42542e+07	2.56177e+07
MePC(37:3)	MePC	M+Na	834.598	14.647	C46 H86 O8 N1 P1 Na1	5.22161e+08	4.97956e+08	5.61363e+08	5.42924e+08	5.6098e+08	5.76429e+08	5.30051e+08	5.38033e+08	5.01177e+08	3.0603e+08	5.528e+08	5.36298e+08	5.53465e+08	5.42487e+08	5.55091e+08	5.35802e+08	5.48162e+08
MePC(37:3e)	MePC	M+Na	820.619	13.595	C46 H88 O7 N1 P1 Na1	5.78376e+07	8.33408e+07	7.68583e+07	7.4279e+07	5.21328e+07	1.18775e+08	1.36207e+08	8.83345e+07	9.16943e+07	7.63068e+07	7.96435e+07	8.63151e+07	8.26591e+07	7.61087e+07	7.958e+07	7.73416e+07	7.15609e+07
MePC(37:4)	MePC	M+Na	832.583	13.2419	C46 H84 O8 N1 P1 Na1	5.88505e+07	5.78349e+07	5.26649e+07	5.00179e+07	5.62653e+07	4.49544e+07	6.05229e+07	7.49999e+07	4.52356e+07	5.25415e+07	5.48294e+07	5.40504e+07	5.29655e+07	4.93287e+07	5.61654e+07	5.20692e+07	5.15105e+07
MePC(37:4e)	MePC	M+Na	818.603	13.1475	C46 H86 O7 N1 P1 Na1	1.44988e+08	1.75014e+08	1.68237e+08	1.56146e+08	1.22755e+08	1.9179e+08	3.45601e+08	1.66484e+08	1.80927e+08	1.73561e+08	1.70825e+08	1.72812e+08	1.71996e+08	1.79433e+08	1.68726e+08	1.70126e+08	1.73437e+08
MePC(37:5)	MePC	M+NH4	825.612	14.573	C46 H86 O8 N2 P1	1.55127e+08	1.78079e+08	1.60644e+08	1.92134e+08	1.37627e+08	1.5131e+08	1.38842e+08	1.90376e+08	1.92399e+08	1.86037e+08	1.77872e+08	1.64002e+08	1.75533e+08	1.60835e+08	1.67656e+08	1.59405e+08	1.6554e+08
MePC(37:5e)	MePC	M+Na	816.588	11.9555	C46 H84 O7 N1 P1 Na1	2.64878e+07	2.41749e+07	2.69345e+07	2.7551e+07	2.53236e+07	2.78349e+07	7.07554e+07	2.68786e+07	2.24512e+07	2.52209e+07	3.37242e+07	2.5588e+07	2.99958e+07	3.29761e+07	2.44803e+07	2.51816e+07	3.02595e+07
MePC(37:6)	MePC	M+Na	828.551	12.2804	C46 H80 O8 N1 P1 Na1	2.71289e+08	2.32747e+08	2.50783e+08	2.50826e+08	3.39071e+08	3.33545e+08	2.51788e+08	2.49093e+08	2.77165e+08	2.9613e+08	2.74631e+08	2.81589e+08	2.82372e+08	2.83053e+08	2.77799e+08	3.0297e+08	3.01999e+08
MePC(38:2)	MePC	M+Na	850.63	14.5707	C47 H90 O8 N1 P1 Na1	8.01438e+06	6.03088e+06	7.40052e+06	5.19639e+07	5.74692e+06	6.41578e+06	9.07406e+06	4.71123e+07	1.23212e+07	1.08668e+07	4.97468e+07	8.47483e+06	7.00384e+06	8.11884e+06	6.95821e+06	9.36085e+06	5.1524e+07
MePC(38:3)	MePC	M+Na	848.614	15.321	C47 H88 O8 N1 P1 Na1	1.51623e+07	1.96876e+07	1.26487e+07	1.20035e+07	9.17116e+06	8.16831e+06	5.56373e+06	1.27828e+07	1.00729e+07	8.69654e+06	1.20651e+07	1.04146e+07	1.00227e+07	7.35005e+06	1.28547e+07	1.19484e+07	1.0523e+07
MePC(38:3e)	MePC	M+Na	834.635	17.3184	C47 H90 O7 N1 P1 Na1	1.32413e+06	3.00183e+06	1.44136e+06	3.18882e+06	3.68468e+06	4.01597e+06	3.34117e+06	9.07106e+06	5.4927e+06	4.09203e+06	3.66801e+06	4.64827e+06	4.50385e+06	2.37016e+06	4.52647e+06	2.0854e+06	3.6311e+06
MePC(38:4e)	MePC	M+Na	832.619	17.088	C47 H88 O7 N1 P1 Na1	113120	301114	61338.5	174153	195592	415983	1.41561e+06	1.25356e+06	759278	101604	219154	593543	105795	212214	122618	464773	679959
MePC(38:5)	MePC	M+NH4	839.627	17.309	C47 H88 O8 N2 P1	2.20425e+07	2.24022e+07	1.96066e+07	2.00633e+07	1.57872e+07	3.30682e+07	2.59222e+07	2.26121e+07	2.30028e+07	2.13626e+07	2.30313e+07	2.09767e+07	2.21685e+07	2.22077e+07	2.11241e+07	2.13215e+07	2.01685e+07
MePC(38:6)	MePC	M+NH4	837.612	15.6601	C47 H86 O8 N2 P1	3.05027e+08	2.95863e+08	2.79414e+08	2.77921e+08	2.28987e+08	2.72313e+08	1.77233e+08	2.80844e+08	3.17847e+08	2.42657e+08	2.80828e+08	3.10951e+08	2.73884e+08	2.6696e+08	2.47663e+08	2.61597e+08	2.54663e+08
MePC(38:7)	MePC	M+NH4	835.596	15.131	C47 H84 O8 N2 P1	3.74565e+07	3.94686e+07	3.89883e+07	4.69135e+07	2.62729e+07	5.09452e+07	4.02818e+07	4.94906e+07	4.61618e+07	4.3539e+07	4.42966e+07	4.00107e+07	4.325e+07	4.45821e+07	4.2529e+07	4.14718e+07	3.9382e+07
MePC(38:8)	MePC	M+NH4	833.58	18.5125	C47 H82 O8 N2 P1	8.83905e+07	8.33734e+07	5.6014e+07	6.79486e+07	7.5839e+07	7.45e+07	7.92507e+07	8.41122e+07	5.34888e+07	7.7219e+07	8.52808e+07	7.31404e+07	7.28694e+07	7.22683e+07	7.49769e+07	8.57983e+07	7.83968e+07
MePC(38:8e)	MePC	M+Na	824.556	14.2818	C47 H80 O7 N1 P1 Na1	1.29948e+07	8.23154e+06	1.19445e+07	1.14871e+07	1.66145e+07	1.01287e+07	9.74877e+06	6.50753e+06	7.63121e+06	1.40325e+07	1.34609e+07	1.14912e+07	1.12317e+07	1.00645e+07	1.2269e+07	1.15619e+07	1.01793e+07
MePC(38:9)	MePC	M+NH4	831.565	13.2503	C47 H80 O8 N2 P1	2.91765e+07	2.36082e+07	3.52409e+07	2.53594e+07	4.21041e+07	1.82802e+07	2.67652e+07	1.91843e+07	2.04701e+07	3.43357e+07	2.79181e+07	2.60747e+07	3.17168e+07	2.85712e+07	2.72617e+07	2.73736e+07	2.85539e+07
MePC(39:0)	MePC	M+Na	868.677	16.731	C48 H96 O8 N1 P1 Na1	1.58185e+08	1.33888e+08	1.45015e+08	1.99687e+08	9.41557e+07	9.16045e+07	7.00139e+07	1.40346e+08	1.18338e+08	7.38688e+07	1.15937e+08	1.4339e+08	1.19763e+08	1.06048e+08	9.9727e+07	1.45361e+08	1.20419e+08
MePC(39:0e)	MePC	M+Na	854.697	17.3622	C48 H98 O7 N1 P1 Na1	2.37534e+07	2.14789e+07	1.68194e+07	2.23062e+07	1.48191e+07	2.88804e+07	3.71004e+07	2.98943e+07	3.19594e+07	2.67695e+07	2.43532e+07	2.48148e+07	2.46298e+07	2.21175e+07	2.20604e+07	2.29594e+07	2.34039e+07
MePC(39:1)	MePC	M+Na	866.661	16.587	C48 H94 O8 N1 P1 Na1	2.02527e+08	2.02237e+08	1.70724e+08	1.75658e+08	1.38095e+08	1.17295e+08	1.13514e+08	1.61034e+08	1.65479e+08	1.09724e+08	1.5868e+08	1.50552e+08	1.54587e+08	1.63012e+08	1.50179e+08	1.5305e+08	1.51288e+08
MePC(39:1e)	MePC	M+NH4	847.726	17.708	C48 H100 O7 N2 P1	3.20253e+06	4.63708e+06	3.09005e+06	2454332	5.11891e+06	5.81493e+06	5.68547e+06	5.07167e+06	1.27353e+07	5.43968e+06	4.73941e+06	5.30231e+06	3.65253e+06	4.51444e+06	4.16242e+06	5.04603e+06	3.94057e+06
MePC(39:2)	MePC	M+Na	864.645	14.805	C48 H92 O8 N1 P1 Na1	3.70263e+07	3.92525e+07	3.71338e+07	4.93723e+07	2.52824e+07	3.35381e+07	3.6371e+07	5.46903e+07	3.77092e+07	3.26638e+07	3.40023e+07	3.67489e+07	3.96204e+07	3.83322e+07	3.92264e+07	3.49012e+07	3.64578e+07
MePC(39:2e)	MePC	M+Na	850.666	17.1383	C48 H94 O7 N1 P1 Na1	8.68685e+06	1.02029e+07	8.22645e+06	9.09059e+06	6.66024e+06	1.47817e+07	1.64952e+07	1.72302e+07	1.04901e+07	7.96913e+06	9.16973e+06	1.10406e+07	1.10795e+07	1.02151e+07	5.73484e+06	9.4065e+06	8.56128e+06
MePC(39:3)	MePC	M+NH4	857.674	17.35	C48 H94 O8 N2 P1	3.15488e+07	2.00063e+07	3.18955e+07	2.46918e+07	1.33104e+07	1.94807e+07	1.74691e+07	2.30972e+07	3.79025e+07	1.35369e+07	1.65541e+07	1.65277e+07	1.66971e+07	1.54813e+07	1.60493e+07	1.57374e+07	1.73113e+07
MePC(39:3e)	MePC	M+Na	848.65	15.751	C48 H92 O7 N1 P1 Na1	1.07654e+08	1.15196e+08	8.94631e+07	1.2152e+08	8.55346e+07	1.68457e+08	2.12839e+08	1.83731e+08	1.70549e+08	1.3305e+08	1.30644e+08	1.28005e+08	1.23296e+08	1.26141e+08	1.20858e+08	1.24328e+08	1.24641e+08
MePC(39:4)	MePC	M+Na	860.614	15.036	C48 H88 O8 N1 P1 Na1	9.72746e+07	7.21784e+07	8.44649e+07	1.14964e+08	7.90783e+07	7.94479e+07	1.09158e+08	7.99058e+07	9.25639e+07	9.97163e+07	9.61699e+07	9.72359e+07	9.35955e+07	9.33754e+07	9.54205e+07	9.23978e+07	9.51499e+07
MePC(39:4e)	MePC	M+Na	846.635	15.547	C48 H90 O7 N1 P1 Na1	6.26036e+07	6.69942e+07	5.2445e+07	7.60942e+07	5.40025e+07	8.50121e+07	1.20908e+08	1.05322e+08	8.11344e+07	7.15204e+07	7.37741e+07	7.05738e+07	7.04665e+07	6.77539e+07	6.61203e+07	6.80154e+07	6.46702e+07
MePC(39:5)	MePC	M+Na	858.598	12.339	C48 H86 O8 N1 P1 Na1	7.82007e+08	9.54987e+08	7.63616e+08	8.99833e+08	5.73815e+08	7.56763e+08	8.78483e+08	1.08887e+09	7.09105e+08	5.93207e+08	7.80776e+08	7.66582e+08	7.47683e+08	7.60251e+08	7.49478e+08	7.65018e+08	7.70943e+08
MePC(39:5e)	MePC	M+Na	844.619	13.255	C48 H88 O7 N1 P1 Na1	2.20414e+06	4.00842e+06	3.1727e+06	1.28088e+06	1.13238e+06	1.44924e+06	1.37156e+07	4.69262e+06	1.69151e+06	717671	3.23164e+06	1.78447e+06	3.09954e+06	3.2526e+06	1.89611e+06	1.94787e+06	3.33359e+06
MePC(39:6)	MePC	M+Na	856.583	11.8214	C48 H84 O8 N1 P1 Na1	1.11734e+08	1.42021e+08	1.2626e+08	1.28491e+08	1.10602e+08	1.32155e+08	1.35062e+08	1.47438e+08	1.09333e+08	1.33714e+08	1.18083e+08	1.20768e+08	1.21301e+08	1.23482e+08	1.14408e+08	1.13905e+08	1.22245e+08
MePC(39:7)	MePC	M+Na	854.567	10.836	C48 H82 O8 N1 P1 Na1	1.85428e+09	2.55268e+09	2.07387e+09	1.86033e+09	1.59921e+09	3.12895e+09	2.79176e+09	2.58386e+09	2.26548e+09	2.15457e+09	2.23776e+09	2.24875e+09	2.16725e+09	2.16342e+09	2.08535e+09	2.10899e+09	2.19818e+09
MePC(40:10)	MePC	M+NH4	857.58	13.6215	C49 H82 O8 N2 P1	2.29649e+08	2.13955e+08	2.21995e+08	1.91638e+08	2.59911e+08	2.02211e+08	1.95784e+08	1.93361e+08	2.12861e+08	2.50766e+08	2.23472e+08	2.33734e+08	2.25166e+08	2.06721e+08	2.2836e+08	2.27494e+08	2.17035e+08
MePC(40:1e)	MePC	M+NH4	861.742	18.1357	C49 H102 O7 N2 P1	5.16625e+06	1.52378e+07	1.73929e+07	2.13812e+07	1.07088e+07	3.40326e+07	1.84412e+07	1.20781e+07	3.06964e+07	1.20203e+07	2.32116e+07	2.1726e+07	1.48606e+07	1.2537e+07	2.12147e+07	2.16341e+07	2.18035e+07
MePC(40:2)	MePC	M+Na	878.661	15.929	C49 H94 O8 N1 P1 Na1	5.38974e+06	7.58031e+06	8.42702e+06	7.67708e+06	5.69296e+06	8.00228e+06	1.03208e+07	1.01509e+07	8.96758e+06	7.48091e+06	9.09289e+06	7.56237e+06	6.24571e+06	7.59967e+06	9.21318e+06	8.01378e+06	6.29326e+06
MePC(40:3)	MePC	M+Na	876.645	15.6066	C49 H92 O8 N1 P1 Na1	1.39702e+07	1.75598e+07	1.55367e+07	1.53032e+07	1.05859e+07	1.18224e+07	1.08795e+07	1.33502e+07	1.67765e+07	1.21129e+07	1.17682e+07	1.20918e+07	1.12142e+07	1.17146e+07	1.26444e+07	1.29461e+07	1.06753e+07
MePC(40:4)	MePC	M+NH4	869.674	16.726	C49 H94 O8 N2 P1	8.42759e+07	9.20943e+07	7.76143e+07	1.16707e+08	6.0723e+07	4.58943e+07	5.41047e+07	9.85947e+07	3.97065e+07	3.57043e+07	7.29031e+07	7.25406e+07	7.4558e+07	7.90321e+07	7.28061e+07	7.56476e+07	7.052e+07
MePC(40:4e)	MePC	M+NH4	855.695	17.2448	C49 H96 O7 N2 P1	1.06837e+07	1.28148e+07	1.55782e+07	1.22772e+07	1.62555e+07	1.90557e+07	1.38631e+07	1.58749e+07	1.78797e+07	1.47495e+07	1.2826e+07	2.26126e+07	1.26296e+07	2.07669e+07	2.23793e+07	1.25603e+07	2.21957e+07
MePC(40:5)	MePC	M+NH4	867.659	16.5895	C49 H92 O8 N2 P1	1.12551e+08	1.1278e+08	9.54353e+07	9.20129e+07	7.39869e+07	6.73058e+07	6.5267e+07	8.80333e+07	9.64062e+07	6.10326e+07	8.6593e+07	8.38072e+07	8.3433e+07	8.05179e+07	7.62552e+07	8.1832e+07	8.15611e+07
MePC(40:6)	MePC	M+Na	870.598	10.8238	C49 H86 O8 N1 P1 Na1	2.90474e+06	3.92256e+06	2.31442e+06	3.31419e+06	1.21626e+06	3.76147e+06	5.448e+06	4.22549e+06	3.18997e+06	2.93938e+06	2.91457e+06	2.39216e+06	3.47878e+06	2.18179e+06	3.41916e+06	2.22345e+06	3.56704e+06
MePC(40:7)	MePC	M+NH4	863.627	15.963	C49 H88 O8 N2 P1	2.33938e+07	2.43612e+07	1.83803e+07	2.7956e+07	1.67148e+07	2.06842e+07	1.23249e+07	3.111e+07	3.22433e+07	1.7113e+07	2.10187e+07	2.19537e+07	2.13149e+07	2.17349e+07	2.06902e+07	2.10392e+07	2.12808e+07
MePC(40:8)	MePC	M+NH4	861.612	9.04529	C49 H86 O8 N2 P1	2.32301e+06	3.10525e+06	1.73369e+06	2.17546e+06	351194	1.40733e+06	1.57768e+06	2.92975e+06	2.13062e+06	2.10817e+06	1.38777e+06	1.66512e+06	1.64373e+06	1.71343e+06	1.4058e+06	1.49428e+06	1.4459e+06
MePC(40:8e)	MePC	M+Na	852.588	15.6475	C49 H84 O7 N1 P1 Na1	2.72266e+07	2.66354e+07	2.29199e+07	2.42312e+07	2.37536e+07	1.94483e+07	1.33972e+07	2.70633e+07	2.45852e+07	2.17416e+07	2.30386e+07	2.4377e+07	2.39511e+07	2.37038e+07	2.51718e+07	2.3986e+07	2.48283e+07
MePC(40:9)	MePC	M+NH4	859.596	12.855	C49 H84 O8 N2 P1	3.66324e+06	2.06245e+06	2.64767e+06	2.47486e+06	1.04423e+06	0	0	946865	3.14589e+06	1.57395e+06	1.36748e+06	2.43518e+06	1.16209e+06	5.32571e+06	1.84829e+06	1.21195e+06	1.67561e+06
MePC(40:9e)	MePC	M+NH4	845.617	15.973	C49 H86 O7 N2 P1	1.98746e+06	1.7453e+06	907177	2.21052e+06	641884	2.05418e+06	3.83801e+06	4.03145e+06	2.00663e+06	2.49393e+06	2.52599e+06	2.49915e+06	2.67403e+06	2.58042e+06	2.08511e+06	2.59076e+06	2.39952e+06
MePC(41:1)	MePC	M+Na	894.692	16.976	C50 H98 O8 N1 P1 Na1	1.66189e+07	1.73426e+07	1.46396e+07	2.36803e+07	8.98003e+06	1.07895e+07	1.74249e+07	2.49307e+07	1.66623e+07	9.20108e+06	1.41054e+07	1.54965e+07	1.40015e+07	1.42621e+07	1.49074e+07	1.40041e+07	1.55539e+07
MePC(41:2)	MePC	M+Na	892.677	16.5031	C50 H96 O8 N1 P1 Na1	1.08168e+08	1.29394e+08	1.06896e+08	1.43704e+08	7.38806e+07	8.57673e+07	1.29252e+08	1.30691e+08	1.18113e+08	6.7724e+07	1.0341e+08	1.06991e+08	1.01314e+08	1.02278e+08	1.00816e+08	9.92415e+07	1.02278e+08
MePC(41:2e)	MePC	M+Na	878.697	17.1924	C50 H98 O7 N1 P1 Na1	1.69612e+07	1.62875e+07	1.25752e+07	1.72875e+07	9.54909e+06	2.03726e+07	2.71041e+07	2.37144e+07	1.8343e+07	1.90752e+07	1.84496e+07	1.83379e+07	1.79753e+07	1.82432e+07	1.59996e+07	1.69111e+07	1.54946e+07
MePC(41:3)	MePC	M+Na	890.661	15.3265	C50 H94 O8 N1 P1 Na1	4.31633e+06	4.30062e+06	3.57484e+06	3.0595e+07	1.02393e+06	814366	2.11689e+06	5.58375e+06	4.77198e+06	1.37725e+07	3.12603e+06	2.35061e+07	2.34162e+07	2.13194e+07	1.96333e+07	2.11603e+07	2.25552e+07
MePC(41:3e)	MePC	M+Na	876.682	16.9104	C50 H96 O7 N1 P1 Na1	1.10296e+07	1.11926e+07	6.05289e+06	1.1606e+07	7.16075e+06	1.88153e+07	2.01655e+07	2.14538e+07	1.59476e+07	1.28939e+07	1.17301e+07	1.2823e+07	1.12245e+07	1.07345e+07	1.09741e+07	1.13411e+07	1.30502e+07
MePC(41:4)	MePC	M+Na	888.645	14.92	C50 H92 O8 N1 P1 Na1	8.78605e+07	1.1428e+08	9.21442e+07	1.07282e+08	6.62577e+07	5.80915e+07	5.39655e+07	1.04799e+08	8.97129e+07	5.74842e+07	8.77399e+07	8.31933e+07	8.51303e+07	8.35849e+07	8.31068e+07	8.69671e+07	8.39807e+07
MePC(41:4e)	MePC	M+Na	874.666	15.6634	C50 H94 O7 N1 P1 Na1	1.20399e+07	1.77846e+07	1.27801e+07	1.5031e+07	1.03869e+07	2.16739e+07	3.05231e+07	2.10077e+07	2.1448e+07	1.72779e+07	1.60646e+07	1.67818e+07	1.52591e+07	1.63167e+07	1.58032e+07	1.66751e+07	1.6878e+07
MePC(41:5)	MePC	M+Na	886.63	13.818	C50 H90 O8 N1 P1 Na1	1.96932e+07	2.51313e+07	1.83878e+07	2.58195e+07	1.33275e+07	8.84785e+06	1.64033e+07	1.97523e+07	1.30836e+07	9.74042e+06	1.61616e+07	1.67132e+07	1.58859e+07	1.45951e+07	1.43643e+07	1.64434e+07	1.70217e+07
MePC(41:5e)	MePC	M+Na	872.65	15.4575	C50 H92 O7 N1 P1 Na1	4.40443e+06	3.3765e+06	2.40466e+06	5.89944e+06	2.89116e+06	1.9944e+06	7.22815e+06	9.38653e+06	8.2355e+06	3.62589e+06	9.98352e+06	6.917e+06	3.90348e+06	5.59703e+06	6.44038e+06	7.45957e+06	5.0796e+06
MePC(41:6)	MePC	M+Na	884.614	12.505	C50 H88 O8 N1 P1 Na1	1.71245e+07	1.87073e+07	1.778e+07	2.10685e+07	1.20337e+07	1.8736e+07	2.42429e+07	2.23825e+07	1.62762e+07	1.54549e+07	1.82772e+07	1.63958e+07	1.67227e+07	1.75847e+07	1.70661e+07	1.7587e+07	2.0804e+07
MePC(41:7)	MePC	M+NH4	877.643	16.798	C50 H90 O8 N2 P1	1.36325e+07	1.55925e+07	1.81853e+07	1.61483e+07	2.05137e+07	6.04746e+06	9.1876e+06	1.09902e+07	7.9117e+06	1.81246e+07	1.54598e+07	1.06957e+07	1.32794e+07	1.41845e+07	1.52482e+07	9.6934e+06	1.34539e+07
MePC(42:10)	MePC	M+NH4	885.612	12.4849	C51 H86 O8 N2 P1	1.17926e+07	1.68122e+07	2.02596e+07	2.42123e+07	1.28266e+07	1.17041e+07	2.07996e+07	3.16909e+07	3.2445e+07	9.66203e+06	1.76302e+07	1.91225e+07	1.67315e+07	1.61677e+07	1.66758e+07	1.87572e+07	1.65472e+07
MePC(42:5e)	MePC	M+NH4	881.711	18.166	C51 H98 O7 N2 P1	3.12323e+06	3.46137e+06	2.03533e+06	3.27201e+06	2.9509e+06	5.49702e+06	5.5011e+06	6.92423e+06	6.74047e+06	5.01549e+06	3.65126e+06	3.67879e+06	4.70294e+06	4.11853e+06	3.72048e+06	3.70323e+06	4.23557e+06
MePC(42:6)	MePC	M+NH4	893.674	16.65	C51 H94 O8 N2 P1	1.29179e+07	2.23097e+07	1.69097e+07	2.45186e+07	9.98922e+06	1.08689e+07	1.94379e+07	1.14872e+07	1.28285e+07	7.87142e+06	1.18821e+07	1.57402e+07	1.11351e+07	1.00466e+07	1.35108e+07	8.32819e+06	1.03223e+07
MePC(42:8)	MePC	M+Na	894.598	10.4307	C51 H86 O8 N1 P1 Na1	3.37868e+06	3.67463e+06	2.83596e+06	3.46096e+06	2.78866e+06	5.37325e+06	7.37212e+06	5.3383e+06	5.5179e+06	3.77773e+06	4.32838e+06	3.7593e+06	3.80573e+06	3.68663e+06	3.7108e+06	3.58957e+06	4.05367e+06
MePC(43:3)	MePC	M+Na	918.692	16.56	C52 H98 O8 N1 P1 Na1	3.91507e+06	5.14081e+06	3.97844e+06	5.23348e+06	2.2796e+06	3.07397e+06	7.095e+06	7.10669e+06	4.79697e+06	1.48923e+06	4.11093e+06	3.61889e+06	3.6907e+06	3.54078e+06	3.22845e+06	4.07115e+06	2.56458e+06
MePC(43:4e)	MePC	M+Na	902.697	16.8282	C52 H98 O7 N1 P1 Na1	4.35393e+06	3.72894e+06	2.89097e+06	3.06337e+06	2.81167e+06	3.84285e+06	9.4672e+06	6.79702e+06	6.49371e+06	5.13438e+06	5.1012e+06	4.69626e+06	4.98124e+06	3.83937e+06	5.78941e+06	3.49161e+06	3.50862e+06
MePC(43:5)	MePC	M+Na	914.661	15.0469	C52 H94 O8 N1 P1 Na1	7.44186e+06	7.20308e+06	7.05595e+06	1.00425e+07	4.84891e+06	5.18728e+06	1.14359e+07	7.56211e+06	3.52985e+06	3.28856e+06	5.28926e+06	9.32866e+06	7.08376e+06	7.61937e+06	5.43511e+06	5.25499e+06	5.89537e+06
MePC(43:5e)	MePC	M+Na	900.682	15.7686	C52 H96 O7 N1 P1 Na1	6.60616e+06	8.35267e+06	5.77105e+06	6.16938e+06	4.00901e+06	5.2438e+06	1.12405e+07	9.3855e+06	5.41695e+06	6.05746e+06	6.17832e+06	5.95424e+06	5.71024e+06	6.88314e+06	6.20371e+06	7.69444e+06	6.09697e+06
MePC(44:2e)	MePC	M+Na	920.744	18.17	C53 H104 O7 N1 P1 Na1	2.14843e+07	2.68646e+07	3.49675e+07	3.44951e+07	3.55809e+07	3.45297e+07	2.47109e+07	2.42489e+07	4.01513e+07	3.3153e+07	3.20554e+07	3.06862e+07	3.13886e+07	3.3124e+07	2.99263e+07	2.84334e+07	2.5104e+07
PC(16:0)	PC	M+H	510.319	4.401	C24 H49 O8 N1 P1	542849	868124	412880	734989	783934	1.20064e+06	1.21364e+06	615179	2.11454e+06	861756	818386	857530	795857	853343	710140	762425	780232
PC(17:2)	PC	M+Na	542.285	2.494	C25 H46 O8 N1 P1 Na1	205096	363433	0	0	0	0	0	0	0	93187.1	14911.4	112599	0	0	628940	0	0
PC(18:0)	PC	M+H	538.35	1.52213	C26 H53 O8 N1 P1	2.54966e+06	3.96675e+06	4.64286e+06	6.98331e+06	2.71766e+06	5.88697e+06	753008	4.85665e+06	7.32772e+06	2.1864e+06	2.46048e+06	2.5636e+06	3.04955e+06	3.41521e+06	2.45799e+06	1.95879e+06	2.852e+06
PC(18:1)	PC	M+Na	558.317	1.27706	C26 H50 O8 N1 P1 Na1	7.78179e+06	1.25088e+07	1.12598e+07	1.84727e+07	6.86589e+06	1.16357e+07	6.50966e+06	1.21676e+07	1.59154e+07	5.94337e+06	9.05899e+06	9.17001e+06	8.87622e+06	9.35779e+06	8.5802e+06	8.39499e+06	7.8698e+06
PC(18:2)	PC	M+H	534.319	1.30997	C26 H49 O8 N1 P1	2.23095e+07	2.78547e+07	2.44351e+07	3.94819e+07	1.68527e+07	1.83374e+07	1.12051e+07	2.56241e+07	3.74234e+07	1.68236e+07	2.06e+07	2.10333e+07	2.14139e+07	2.00158e+07	1.98168e+07	2.17229e+07	1.83991e+07
PC(19:0)	PC	M+H	552.366	4.34801	C27 H55 O8 N1 P1	2.33458e+06	4.09878e+06	2.99211e+06	3.25452e+06	1.93744e+06	3.23328e+06	3.00062e+06	1.88012e+06	4.69212e+06	2.45713e+06	2.56828e+06	2.51433e+06	2.63882e+06	2.52477e+06	2.59539e+06	2.80903e+06	2.54208e+06
PC(19:2e)	PC	M+H	534.355	2.9365	C27 H53 O7 N1 P1	1.39079e+06	2.4422e+06	1.90843e+06	3.28773e+06	2.44158e+06	4.92265e+06	3.29269e+06	3.48824e+06	4.25535e+06	2.07752e+06	3.26747e+06	2.34433e+06	2.7146e+06	2.6056e+06	2.70578e+06	2.63713e+06	2.65528e+06
PC(19:3e)	PC	M+H	532.34	5.23421	C27 H51 O7 N1 P1	7.32622e+06	3.9485e+06	3.11766e+06	7.23221e+06	7.89721e+06	1.51807e+07	1.63724e+07	9.43393e+06	1.37945e+07	9.70539e+06	9.29302e+06	8.27853e+06	7.48715e+06	8.40041e+06	8.61665e+06	8.84362e+06	8.51474e+06
PC(19:4)	PC	M+Na	566.285	2.30121	C27 H46 O8 N1 P1 Na1	6.33827e+06	9.04479e+06	6.76208e+06	7.44756e+06	6.38293e+06	4.50777e+06	4.11816e+06	7.60658e+06	6.89981e+06	5.60874e+06	5.55713e+06	5.65619e+06	5.68457e+06	5.84221e+06	4.28876e+06	5.13585e+06	3.83216e+06
PC(19:4e)	PC	M+H	530.324	2.07344	C27 H49 O7 N1 P1	837658	1.69602e+06	1.42897e+06	2.41316e+06	2.29184e+06	3.0868e+06	1.69215e+06	2.35985e+06	4.64463e+06	824381	1.6678e+06	1.963e+06	1.75463e+06	1.75901e+06	2.28574e+06	2.23339e+06	2.0616e+06
PC(19:5e)	PC	M+H	528.308	2.58236	C27 H47 O7 N1 P1	2.32684e+07	4.23755e+07	2.44154e+07	2.82351e+07	2.23411e+07	4.79187e+07	4.81533e+07	3.64612e+07	4.88905e+07	2.79303e+07	2.99434e+07	3.06804e+07	2.89814e+07	2.88259e+07	2.83351e+07	2.87296e+07	2.84699e+07
PC(20:0)	PC	M+H	566.382	4.97321	C28 H57 O8 N1 P1	1.4224e+06	4.76819e+06	3.71073e+06	2.74014e+06	749900	342181	409868	240491	1.62622e+06	992598	789342	1.07318e+06	880546	1.31029e+06	738520	1.24392e+06	653466
PC(14:0e_6:0)	PC	M+Na	574.384	6.869	C28 H58 O7 N1 P1 Na1	1.31378e+07	1.48954e+07	1.14682e+07	1.88553e+07	1.73436e+07	2.88481e+07	1.74955e+07	2.48552e+07	2.96437e+07	1.83303e+07	2.03673e+07	1.93829e+07	1.89559e+07	1.81148e+07	1.76029e+07	1.83728e+07	1.86808e+07
PC(20:3)	PC	M+Na	582.317	1.35191	C28 H50 O8 N1 P1 Na1	3.41462e+06	5.4545e+06	4.37191e+06	8.86323e+06	2.77273e+06	4.32883e+06	3.98293e+06	4.39934e+06	6.97757e+06	3.45278e+06	3.51505e+06	3.79924e+06	3.93077e+06	3.57142e+06	3.63471e+06	3.80588e+06	3.5972e+06
PC(20:4)	PC	M+H	558.319	1.677	C28 H49 O8 N1 P1	564016	1.84066e+06	959958	778282	417107	668536	391206	246407	1.99011e+06	739485	925855	162937	454971	652847	732309	189591	796564
PC(21:0e)	PC	M+H	566.418	7.80585	C29 H61 O7 N1 P1	2.68549e+06	2.8364e+06	2.58055e+06	3.28614e+06	6.97212e+06	3.03352e+06	6.94825e+06	1.06695e+07	4.00765e+06	2.71488e+06	7.50447e+06	2.68245e+06	3.07457e+06	2.78538e+06	2.95184e+06	8.44188e+06	3.11518e+06
PC(21:1e)	PC	M+H	564.402	6.16784	C29 H59 O7 N1 P1	790249	1.182e+06	821224	1.65227e+06	1.0676e+06	1.70504e+06	1.31212e+06	1.80904e+06	1.45267e+06	985830	1.1472e+06	1.1954e+06	1.10478e+06	1.19584e+06	1.19927e+06	1.21081e+06	1.29697e+06
PC(21:4e)	PC	M+H	558.355	4.2752	C29 H53 O7 N1 P1	1.92052e+06	2.21093e+06	1.80862e+06	4.28551e+06	5.96903e+06	1.95168e+07	1.0215e+07	7.35119e+06	1.22292e+07	5.70558e+06	5.30249e+06	5.62294e+06	5.35356e+06	5.34379e+06	4.94252e+06	5.54707e+06	5.12985e+06
PC(22:0)	PC	M+H	594.413	7.06962	C30 H61 O8 N1 P1	2.57521e+06	5.25511e+06	3.18935e+06	3.41112e+06	2.62416e+06	1.88223e+06	2.28758e+06	2.03185e+06	3.75537e+06	2.00159e+06	2.40954e+06	2.66956e+06	2.68023e+06	2.76317e+06	2.48776e+06	2.35449e+06	2.48592e+06
PC(23:0e)	PC	M+H	594.449	9.64738	C31 H65 O7 N1 P1	7.21925e+06	8.99323e+06	7.11604e+06	1.04053e+07	5.4229e+06	1.16743e+07	1.41182e+07	1.03879e+07	9.85818e+06	7.56688e+06	8.38481e+06	7.88964e+06	8.5604e+06	7.90293e+06	8.16818e+06	8.65122e+06	8.67237e+06
PC(23:2)	PC	M+H	604.397	4.33787	C31 H59 O8 N1 P1	1.17951e+06	998212	634424	1.73029e+06	1.53287e+06	4.59853e+06	4.58037e+06	2.12447e+06	140845	2.56878e+06	1.56809e+06	1.65929e+06	1.75936e+06	1.68186e+06	1.60212e+06	1.69468e+06	1.64349e+06
PC(24:0)	PC	M+H	622.444	8.10787	C32 H65 O8 N1 P1	1.41227e+06	2.08854e+06	1.87789e+06	2.01413e+06	1.32037e+06	917020	1.71206e+06	1.12646e+06	2.45135e+06	908470	1.32054e+06	1.7043e+06	1.15365e+06	1.67791e+06	1.52852e+06	1.23976e+06	1.39769e+06
PC(8:0e_16:0)	PC	M+Na	630.447	10.48	C32 H66 O7 N1 P1 Na1	6.40969e+06	1.07321e+07	5.88436e+06	7.61324e+06	4.88886e+06	1.10174e+07	1.25082e+07	9.29801e+06	1.14441e+07	6.31036e+06	8.78914e+06	7.71384e+06	7.45181e+06	7.77996e+06	7.08276e+06	7.73599e+06	7.8117e+06
PC(24:3e)	PC	M+H	602.418	8.795	C32 H61 O7 N1 P1	1.06849e+07	7.85579e+06	1.01282e+07	8.76836e+06	1.04542e+07	1.06906e+07	1.72117e+07	1.23733e+07	1.53563e+07	8.74216e+06	1.06228e+07	1.11866e+07	1.07476e+07	1.02765e+07	9.93241e+06	1.08532e+07	1.01046e+07
PC(24:4e)	PC	M+H	600.402	4.7693	C32 H59 O7 N1 P1	2.41462e+06	2.98747e+06	3.33333e+06	6.93784e+06	4.39033e+06	7.74336e+06	1.05702e+07	5.93654e+06	5.67898e+06	3.61685e+06	4.47984e+06	4.87523e+06	4.49135e+06	4.27747e+06	4.62253e+06	4.7495e+06	4.99888e+06
PC(24:5e)	PC	M+H	598.387	3.76233	C32 H57 O7 N1 P1	3.93068e+06	4.94272e+06	4.94708e+06	9.47682e+06	6.58344e+06	1.29693e+07	1.22185e+07	1.07836e+07	1.01329e+07	5.84628e+06	7.25733e+06	6.95914e+06	7.32266e+06	6.71126e+06	7.24436e+06	7.37514e+06	7.13063e+06
PC(25:4)	PC	M+H	628.397	4.06789	C33 H59 O8 N1 P1	356037	538892	211815	948617	901436	2.35864e+06	2.34888e+06	1.17706e+06	0	1.50039e+06	869651	727260	829268	709625	744359	793641	848635
PC(10:1e_16:0)	PC	M+H	634.481	10.4146	C34 H69 O7 N1 P1	1.40277e+06	1.60118e+06	1.53315e+06	2.24953e+06	1.39999e+06	3.00543e+06	4.41196e+06	2.37154e+06	3.22904e+06	1.56941e+06	1.95619e+06	2.04911e+06	2.08165e+06	1.87979e+06	1.66118e+06	1.98099e+06	1.93208e+06
PC(27:0)	PC	M+H	664.491	10.2614	C35 H71 O8 N1 P1	3.19042e+06	3.27341e+06	4.95723e+06	5.67046e+06	1.57962e+06	5.22201e+06	8.16439e+06	2.78496e+06	1.35906e+07	6.70393e+06	4.66792e+06	5.15386e+06	4.76482e+06	5.23776e+06	4.57827e+06	5.00301e+06	4.8561e+06
PC(27:4)	PC	M+H	656.429	4.52664	C35 H63 O8 N1 P1	2.25668e+06	2.13496e+06	1.87905e+06	2.012e+06	763291	1.16651e+06	1.38642e+06	1.86925e+06	1.7002e+06	758166	1.26806e+06	1.35508e+06	1.40096e+06	1.35738e+06	1.39219e+06	1.46816e+06	1.42297e+06
PC(28:0)	PC	M+H	678.507	11.516	C36 H73 O8 N1 P1	1.782	2.132	0	0	0	7.47059e+06	3.07849e+06	559218	2.03401e+06	1.1524e+06	1.41	449295	0	0	588679	420909	414978
PC(28:2)	PC	M+H	674.476	8.492	C36 H69 O8 N1 P1	567867	908120	509950	829897	377125	980822	1.1994e+06	857343	545413	454173	548521	641060	682755	738013	578482	521350	740574
PC(18:2_10:1)	PC	M+H	672.46	8.788	C36 H67 O8 N1 P1	8.65498e+06	1.28668e+07	5.77788e+06	6.5648e+06	2.47061e+06	6.98118e+06	1.04595e+07	4.54846e+06	7.22429e+06	7.78513e+06	5.66296e+06	5.30417e+06	5.00214e+06	5.39495e+06	6.10153e+06	5.33718e+06	5.08709e+06
PC(29:0)	PC	M+H	692.522	11.7984	C37 H75 O8 N1 P1	9.90301e+06	1.01257e+07	1.00399e+07	1.4772e+07	7.97109e+06	1.13489e+07	2.02143e+07	1.07199e+07	1.57498e+07	1.17424e+07	1.11993e+07	1.25808e+07	1.08229e+07	1.1267e+07	1.05927e+07	9.53196e+06	1.07307e+07
PC(29:1)	PC	M+H	690.507	10.3625	C37 H73 O8 N1 P1	3.69001e+06	2.77827e+06	4.61564e+06	5.10472e+06	1.52488e+06	4.21343e+06	7.10622e+06	2.67193e+06	1.00572e+07	5.00164e+06	4.18484e+06	3.88055e+06	3.79532e+06	4.0925e+06	3.6923e+06	3.95588e+06	3.82142e+06
PC(29:2)	PC	M+H	688.491	9.16875	C37 H71 O8 N1 P1	1.07489e+06	1.36924e+06	2.04766e+06	1.36416e+06	440530	1.22853e+06	1.76331e+06	921393	4.33804e+06	1.79763e+06	1.67308e+06	1.53698e+06	1.3671e+06	1.36578e+06	1.6058e+06	1.40918e+06	1.47514e+06
PC(30:0)	PC	M+H	706.538	12.5565	C38 H77 O8 N1 P1	9.11849e+08	1.16366e+09	1.07614e+09	1.3985e+09	7.44433e+08	1.4523e+09	1.79796e+09	1.26533e+09	1.45581e+09	9.59181e+08	1.13594e+09	1.11668e+09	1.08809e+09	1.10028e+09	1.07716e+09	1.12101e+09	1.10388e+09
PC(30:0e)	PC	M+H	692.559	13.4736	C38 H79 O7 N1 P1	4.25378e+07	4.79791e+07	4.83759e+07	5.2366e+07	3.39425e+07	4.79463e+07	7.879e+07	7.15705e+07	5.06409e+07	4.41281e+07	4.90329e+07	4.63446e+07	4.63328e+07	4.56888e+07	4.93047e+07	4.54505e+07	4.43865e+07
PC(30:1)	PC	M+H	704.522	11.1805	C38 H75 O8 N1 P1	1.07441e+08	1.65155e+08	1.57624e+08	2.21356e+08	9.89913e+07	1.91629e+08	1.9801e+08	1.93554e+08	2.68604e+08	1.32019e+08	1.57802e+08	1.60558e+08	1.61046e+08	1.56543e+08	1.56488e+08	1.6303e+08	1.58187e+08
PC(14:1e_16:0)	PC	M+H	690.543	13.259	C38 H77 O7 N1 P1	961089	1.80862e+06	1.8061e+06	2.46895e+06	1.50495e+06	1.49459e+06	1.51499e+06	1.78819e+06	2.52315e+06	2.8515e+06	654355	1.99772e+06	1.6015e+06	2.01389e+06	1.59274e+06	1.62154e+06	3.25994e+06
PC(31:0)	PC	M+H	720.554	13.2078	C39 H79 O8 N1 P1	3.84856e+08	4.23054e+08	4.30139e+08	5.07886e+08	3.58804e+08	4.00132e+08	6.51531e+08	4.05921e+08	4.16024e+08	3.70219e+08	4.04469e+08	4.07882e+08	3.97627e+08	3.83421e+08	4.0597e+08	4.08814e+08	3.86767e+08
PC(31:0e)	PC	M+H	706.575	14.2207	C39 H81 O7 N1 P1	1.21519e+07	1.31293e+07	1.41387e+07	1.76921e+07	6.99602e+06	8.64781e+06	2.89705e+07	1.58381e+07	1.13169e+07	1.27034e+07	1.35324e+07	1.4222e+07	1.46043e+07	1.59643e+07	1.45444e+07	1.65419e+07	1.44709e+07
PC(31:1)	PC	M+H	718.538	11.9498	C39 H77 O8 N1 P1	9.80246e+07	1.24364e+08	1.26262e+08	1.94914e+08	7.73802e+07	9.77944e+07	1.14448e+08	1.19484e+08	1.54236e+08	1.09206e+08	1.20679e+08	1.09796e+08	1.23985e+08	1.20343e+08	1.08655e+08	1.057e+08	1.0837e+08
PC(31:2e)	PC	M+H	702.543	14.2811	C39 H77 O7 N1 P1	1.99439e+07	2.25144e+07	1.81117e+07	1.39932e+07	6.88848e+06	1.70299e+07	2.88852e+07	1.08182e+07	2.11673e+07	1.67965e+07	1.55117e+07	1.66133e+07	1.48446e+07	1.52728e+07	1.64343e+07	1.41342e+07	1.56041e+07
PC(31:3)	PC	M+H	714.507	12.3479	C39 H73 O8 N1 P1	1.63699e+08	1.82213e+08	1.13378e+08	1.46647e+08	9.25286e+07	2.23325e+08	2.49927e+08	2.00448e+08	2.64083e+08	1.37667e+08	1.7267e+08	1.83981e+08	1.80831e+08	1.77423e+08	1.78913e+08	1.65538e+08	1.75902e+08
PC(18:0_14:0)	PC	M+H	734.569	16.1753	C40 H81 O8 N1 P1	4.40199e+06	5.17559e+06	4.53242e+06	1.55139e+07	2.63433e+06	1.2124e+07	1.05482e+07	4.52667e+06	7.43554e+06	7.41505e+06	5.98107e+06	3.65663e+06	4.40343e+06	2.7224e+06	3.62216e+06	5.79246e+06	6.81371e+06
PC(14:0e_18:0)	PC	M+Na	742.572	14.892	C40 H82 O7 N1 P1 Na1	1.07683e+08	1.12202e+08	1.16287e+08	1.27332e+08	9.46415e+07	1.01956e+08	1.44491e+08	1.31006e+08	1.03875e+08	1.05766e+08	1.17586e+08	1.06885e+08	1.09701e+08	1.07966e+08	1.13692e+08	1.05694e+08	1.14115e+08
PC(32:1e)	PC	M+H	718.575	13.7678	C40 H81 O7 N1 P1	6.68888e+06	1.5265e+08	3.30943e+07	3.59172e+07	5.68118e+07	2.79387e+07	3.93566e+07	5.41877e+07	3.18906e+07	8.16548e+07	1.93856e+07	1.01818e+08	2.71427e+07	2.12059e+07	2.92945e+07	3.05641e+07	3.21106e+07
PC(32:2)	PC	M+H	730.538	11.4583	C40 H77 O8 N1 P1	3.20113e+09	3.79191e+09	3.37023e+09	4.24006e+09	2.25932e+09	4.24199e+09	5.25564e+09	4.12287e+09	5.0352e+09	2.6777e+09	3.6168e+09	3.5512e+09	3.60488e+09	3.51034e+09	3.38303e+09	3.4727e+09	3.58109e+09
PC(18:1_14:1)	PC	M+H	730.538	12.5866	C40 H77 O8 N1 P1	2.88836e+07	2.52497e+07	1.79179e+07	2.43344e+07	3.71939e+07	1.62928e+08	7.69866e+07	4.53047e+07	9.61052e+07	7.96294e+07	4.38086e+07	4.33389e+07	6.82138e+07	5.16609e+07	6.25814e+07	4.18378e+07	6.61727e+07
PC(32:2e)	PC	M+H	716.559	12.3977	C40 H79 O7 N1 P1	4.82711e+06	1.21022e+07	1.32973e+07	4.11853e+06	1.93238e+06	1.37848e+06	9.07106e+06	5.1252e+06	9.37727e+06	5.20855e+06	7.28394e+06	6.19714e+06	7.70449e+06	5.0116e+06	6.26461e+06	5.47987e+06	5.32842e+06
PC(14:0_18:3)	PC	M+Na	750.504	10.677	C40 H74 O8 N1 P1 Na1	4.08692e+06	5.73684e+06	4.0933e+06	5.50275e+06	2.76744e+06	6.76645e+06	9.1263e+06	5.4041e+06	1.14942e+07	3.23559e+06	5.34833e+06	4.48791e+06	4.64515e+06	4.47564e+06	4.12382e+06	4.81199e+06	4.12617e+06
PC(18:2_14:1)	PC	M+H	728.522	12.8069	C40 H75 O8 N1 P1	3.98642e+07	4.7688e+07	3.7155e+07	3.97387e+07	2.31636e+07	2.86078e+07	2.16422e+07	4.27142e+07	3.64902e+07	1.6892e+07	2.91756e+07	2.96492e+07	3.38705e+07	3.03014e+07	3.61123e+07	3.47932e+07	3.61384e+07
PC(32:4)	PC	M+H	726.507	9.69407	C40 H73 O8 N1 P1	3.86406e+06	6.79413e+06	5.43759e+06	4.0686e+06	4.18598e+06	9.47029e+06	8.86406e+06	8.83894e+06	7.57795e+06	5.27198e+06	5.40636e+06	6.69039e+06	6.49816e+06	6.08366e+06	6.6838e+06	6.58164e+06	4.21279e+06
PC(32:5)	PC	M+H	724.491	9.44662	C40 H71 O8 N1 P1	1.54453e+06	1.13533e+06	625449	1.18129e+06	872319	2.48132e+06	2.92622e+06	2.54927e+06	2.23566e+06	1.45609e+06	1.28934e+06	1.46352e+06	1.48223e+06	1.38715e+06	1.42542e+06	1.30312e+06	1.38915e+06
PC(33:0)	PC	M+H	748.585	14.6134	C41 H83 O8 N1 P1	4.08849e+08	5.58782e+08	5.348e+08	5.65945e+08	3.74395e+08	4.4572e+08	7.92958e+08	5.64173e+08	4.72267e+08	4.89379e+08	5.37643e+08	4.51197e+08	5.35403e+08	4.49216e+08	5.23517e+08	4.41208e+08	5.28283e+08
PC(33:0e)	PC	M+H	734.606	15.5286	C41 H85 O7 N1 P1	2.36842e+07	2.9128e+07	2.37022e+07	2.76503e+07	1.6362e+07	2.82995e+07	4.85238e+07	3.40761e+07	3.0694e+07	2.47189e+07	2.92729e+07	2.66732e+07	2.69007e+07	2.50361e+07	2.55668e+07	2.62667e+07	2.38835e+07
PC(33:1)	PC	M+H	746.569	13.4315	C41 H81 O8 N1 P1	2.05658e+09	1.98813e+09	1.99021e+09	2.71601e+09	1.78104e+09	2.01812e+09	1.89286e+09	1.98303e+09	2.27935e+09	1.79859e+09	2.016e+09	2.02403e+09	1.98127e+09	1.92317e+09	1.98883e+09	1.96916e+09	1.99295e+09
PC(33:1e)	PC	M+H	732.59	16.583	C41 H83 O7 N1 P1	2.87514e+07	3.50042e+07	3.72357e+07	3.88743e+07	1.90328e+07	4.95046e+07	5.43401e+07	3.04766e+07	4.75991e+07	3.66662e+07	3.73691e+07	3.59614e+07	3.23264e+07	3.48037e+07	2.84036e+07	3.56925e+07	2.59366e+07
PC(33:2)	PC	M+H	744.554	12.0645	C41 H79 O8 N1 P1	1.29622e+08	1.86264e+08	1.81589e+08	2.736e+08	1.09094e+08	1.38986e+08	1.29582e+08	1.79094e+08	1.72276e+08	1.28293e+08	1.62256e+08	1.09484e+09	1.61328e+08	1.5869e+08	1.58595e+08	1.52653e+08	1.65461e+08
PC(15:0_18:2)	PC	M+H	744.554	14.7641	C41 H79 O8 N1 P1	7.40359e+09	6.50507e+09	5.84235e+09	6.05738e+09	5.05662e+09	9.64965e+09	9.76776e+09	7.6518e+09	8.11863e+09	6.45792e+09	6.80015e+09	6.89479e+09	7.28295e+09	6.33588e+09	7.1409e+09	7.37122e+09	7.27426e+09
PC(33:3)	PC	M+H	742.538	11.4156	C41 H77 O8 N1 P1	1.01404e+08	1.02837e+08	7.26513e+07	1.04686e+08	5.64721e+07	8.53784e+07	9.10311e+07	8.05076e+07	1.36204e+08	6.15824e+07	8.9507e+07	9.04098e+07	8.29059e+07	8.48499e+07	7.81388e+07	8.30164e+07	8.05769e+07
PC(33:4)	PC	M+H	740.522	9.58995	C41 H75 O8 N1 P1	1.7109e+07	4.32044e+07	3.21595e+07	1.3407e+07	7.06521e+06	1.14462e+07	2.22469e+07	1.16493e+07	2.146e+07	1.41209e+07	1.88333e+07	1.85672e+07	1.7786e+07	1.64409e+07	1.78928e+07	1.82543e+07	1.65104e+07
PC(33:5)	PC	M+H	738.507	12.0649	C41 H73 O8 N1 P1	6.7058e+08	6.7906e+08	5.71647e+08	6.82043e+08	4.81601e+08	1.33878e+09	8.38618e+08	8.62817e+08	1.06353e+09	6.67513e+08	7.85793e+08	7.85793e+08	8.04709e+08	7.94257e+08	7.69873e+08	7.42119e+08	7.99898e+08
PC(34:0)	PC	M+H	762.601	15.3673	C42 H85 O8 N1 P1	2.9088e+09	3.47693e+09	3.29712e+09	3.96725e+09	2.57251e+09	3.39132e+09	4.86494e+09	3.73509e+09	3.61082e+09	3.06983e+09	3.24177e+09	3.2652e+09	3.28296e+09	3.2021e+09	3.02609e+09	3.16646e+09	3.24934e+09
PC(34:0e)	PC	M+H	748.621	16.1695	C42 H87 O7 N1 P1	3.15611e+08	3.77582e+08	3.10989e+08	3.8748e+08	2.1388e+08	4.35999e+08	5.94397e+08	5.06229e+08	4.3076e+08	3.16951e+08	3.71538e+08	3.71073e+08	3.56192e+08	3.35157e+08	3.38189e+08	3.50391e+08	3.52986e+08
PC(18:0_16:1)	PC	M+H	760.585	10.373	C42 H83 O8 N1 P1	72294.8	0	0	95288	0	0	0	0	0	0	208219	0	0	0	37506.5	11084.9	14403.4
PC(26:1_8:0)	PC	M+H	760.585	18.265	C42 H83 O8 N1 P1	1.06394e+07	7.62903e+07	4.80421e+07	2.78872e+07	1.52021e+07	2.74291e+07	3.64401e+07	8.11052e+07	2.38713e+07	1.7849e+07	4.82479e+06	2.03878e+07	2.03311e+07	1.94296e+06	2.05926e+07	2.22101e+07	2.72085e+07
PC(16:1e_18:0)	PC	M+Na	768.588	14.9001	C42 H84 O7 N1 P1 Na1	1.48763e+08	1.60087e+08	1.65647e+08	1.71535e+08	1.37372e+08	1.40314e+08	1.82121e+08	1.824e+08	1.70835e+08	1.52712e+08	1.59354e+08	1.60595e+08	1.60229e+08	1.65496e+08	1.71772e+08	1.6464e+08	1.57332e+08
PC(34:1e)	PC	M+H	746.606	15.181	C42 H85 O7 N1 P1	6.60458e+08	8.42601e+08	6.61339e+08	1.02487e+09	5.34566e+08	1.21488e+09	1.17732e+09	9.2327e+08	9.40224e+08	7.97522e+08	9.44947e+08	9.01588e+08	6.66312e+08	7.3173e+08	6.69966e+08	8.77127e+08	6.34884e+08
PC(20:1_14:1)	PC	M+H	758.569	17.2851	C42 H81 O8 N1 P1	1.56605e+07	1.25856e+07	1.14327e+07	1.71785e+07	1.05744e+07	2.2827e+07	1.35523e+07	1.69002e+07	1.47169e+07	6.49655e+06	1.07669e+07	1.17167e+07	1.29807e+07	7.62279e+06	1.41151e+07	8.77883e+06	8.84115e+06
PC(16:2e_18:0)	PC	M+Na	766.572	13.8352	C42 H82 O7 N1 P1 Na1	3.55393e+07	3.47248e+07	3.52016e+07	2.94618e+07	2.01432e+07	1.91086e+07	3.2417e+07	3.27475e+07	2.37251e+07	2.51249e+07	3.05458e+07	2.84467e+07	2.86052e+07	2.98528e+07	2.82796e+07	2.90589e+07	2.85949e+07
PC(14:1e_20:1)	PC	M+H	744.59	16.9027	C42 H83 O7 N1 P1	1.75557e+07	1.40483e+07	8.99232e+06	1.55938e+07	1.02205e+07	3.58674e+07	3.09642e+07	2.3092e+07	1.20912e+07	1.50342e+07	1.34083e+07	1.47129e+07	1.25597e+07	1.40509e+07	1.49578e+07	1.38591e+07	1.40088e+07
PC(16:1_18:2)	PC	M+Na	778.536	11.6103	C42 H78 O8 N1 P1 Na1	2.27104e+08	1.39035e+08	2.40713e+08	2.18911e+08	2.3953e+08	1.64748e+08	2.01205e+08	1.86195e+08	2.03746e+08	2.05339e+08	2.16726e+08	2.24689e+08	2.28738e+08	2.20264e+08	2.19087e+08	2.28043e+08	2.05026e+08
PC(14:0_20:3)	PC	M+H	756.554	14.365	C42 H79 O8 N1 P1	1.32419e+07	1.29952e+07	1.02572e+07	1.09336e+07	6.78619e+06	9.684e+06	1.22209e+07	9.77959e+06	1.04574e+07	8.00843e+06	8.78621e+06	1.59016e+07	9.8985e+06	1.02434e+07	5.88639e+06	7.62764e+06	1.01997e+07
PC(34:3e)	PC	M+H	742.575	12.45	C42 H81 O7 N1 P1	2.3555e+06	6.75519e+06	4.63391e+06	2.30434e+06	2.152e+06	2912246	7.65724e+06	8.41802e+06	9.70388e+06	1.56798e+06	3.10313e+06	4.65652e+06	3.71075e+06	3.76634e+06	3.47035e+06	3.51559e+06	1.53533e+06
PC(18:3e_16:0)	PC	M+H	742.575	12.8186	C42 H81 O7 N1 P1	7.8926e+06	1.13649e+07	1.4497e+07	3.48605e+06	883966	465224	4.31469e+06	1.5229e+06	13545.1	4.97712e+06	3.42599e+06	3.67828e+06	4.74199e+06	3.76191e+06	3.831e+06	2.53357e+06	2.3571e+06
PC(16:1e_18:2)	PC	M+H	742.575	14.9008	C42 H81 O7 N1 P1	1.077e+08	1.11756e+08	1.16701e+08	1.27122e+08	9.40437e+07	1.00648e+08	1.43132e+08	1.32242e+08	1.03369e+08	1.07264e+08	1.17459e+08	1.06533e+08	1.09688e+08	1.10086e+08	1.13406e+08	1.07317e+08	1.15462e+08
PC(34:4)	PC	M+H	754.538	10.5768	C42 H77 O8 N1 P1	4.1251e+08	4.48383e+08	3.39511e+08	5.3396e+08	3.67558e+08	6.98112e+08	7.45763e+08	5.56347e+08	9.12183e+08	3.58943e+08	4.95763e+08	4.87633e+08	4.69654e+08	4.76336e+08	4.51004e+08	4.55451e+08	5.02828e+08
PC(34:5)	PC	M+H	752.522	10.9246	C42 H75 O8 N1 P1	6.6561e+06	5.74277e+06	4.11858e+06	8.37415e+06	5.56998e+06	1.72331e+07	1.43487e+07	1.46359e+07	1.28613e+07	9.55882e+06	9.25581e+06	8.08382e+06	7.79615e+06	8.33408e+06	7.11188e+06	9.01694e+06	8.83063e+06
PC(14:1e_20:4)	PC	M+H	738.543	14.2369	C42 H77 O7 N1 P1	1.726e+07	2.14906e+07	2.10095e+07	2.45477e+07	1.58072e+07	3.88201e+07	3.70829e+07	2.26392e+07	2.72768e+07	1.74162e+07	1.8937e+07	1.8637e+07	1.78091e+07	1.94797e+07	2.41087e+07	2.49387e+07	1.94421e+07
PC(34:6)	PC	M+H	750.507	9.31	C42 H73 O8 N1 P1	1.79614e+06	1.8443e+06	1.96612e+06	2.08443e+06	1.78283e+06	3.43085e+06	3.56073e+06	2.77919e+06	4.1063e+06	1.58508e+06	2.00602e+06	2.2659e+06	1.87166e+06	1.98793e+06	1.98955e+06	2.12209e+06	2.24676e+06
PC(12:1e_22:6)	PC	M+H	734.512	12.5283	C42 H73 O7 N1 P1	1.13102e+07	8.8067e+06	5.6582e+06	1.36633e+07	6.93544e+06	1.17425e+07	1.06261e+07	1.17918e+07	1.31105e+07	1.08203e+07	1.22197e+07	1.28065e+07	7.78319e+06	9.81427e+06	8.92349e+06	9.15649e+06	1.19639e+07
PC(35:0)	PC	M+H	776.616	15.8922	C43 H87 O8 N1 P1	4.4085e+07	1.80122e+08	4.81012e+07	1.99368e+08	3.96223e+07	1.2445e+08	1.53501e+08	2.06098e+08	1.92453e+08	1.49444e+08	1.1183e+08	5.90395e+07	1.0728e+08	1.0462e+08	1.01596e+08	1.08483e+08	1.08043e+08
PC(35:0e)	PC	M+H	762.637	16.775	C43 H89 O7 N1 P1	418869	2.66036e+06	2.68323e+06	2.06624e+06	1.12799e+06	1.59361e+06	1.48342e+06	1.41371e+06	2.70009e+06	4.31818e+06	288719	1.99937e+06	737705	0	2.10192e+06	1.02212e+06	1.80279e+06
PC(19:1_16:0)	PC	M+H	774.601	15.731	C43 H85 O8 N1 P1	1.35604e+07	2.97893e+07	2.31975e+07	2.30098e+07	1.22669e+07	3.40027e+07	5.58964e+07	3.99276e+07	2.08353e+07	1.47466e+07	3.69154e+07	1.94627e+07	1.73939e+07	3.75629e+07	1.70556e+07	1.92147e+07	2.79681e+07
PC(35:1e)	PC	M+H	760.621	17.631	C43 H87 O7 N1 P1	8.0286e+06	1.30834e+07	1.2411e+07	1.16715e+07	5.69812e+06	1.32019e+07	2.45304e+07	1.6922e+07	1.98839e+07	1.55771e+07	1.07469e+07	1.17225e+07	1.17311e+07	1.32261e+07	9.92345e+06	1.21463e+07	1.05005e+07
PC(35:2)	PC	M+H	772.585	13.4823	C43 H83 O8 N1 P1	1.82936e+09	2.22152e+09	1.9907e+09	2.2442e+09	1.55083e+09	1.99339e+09	1.93016e+09	2.04831e+09	2.07366e+09	1.76544e+09	1.86051e+09	1.88361e+09	1.81428e+09	1.81342e+09	1.77277e+09	1.77307e+09	1.83956e+09
PC(15:0_20:2)	PC	M+H	772.585	15.757	C43 H83 O8 N1 P1	1.20808e+08	1.7252e+08	1.4758e+08	1.82684e+08	9.89274e+07	1.50632e+08	1.04291e+08	2.12918e+08	1.62208e+08	1.26284e+08	1.5337e+08	1.4921e+08	1.35967e+08	1.47807e+08	1.34875e+08	1.41455e+08	1.43259e+08
PC(35:2e)	PC	M+H	758.606	16.8167	C43 H85 O7 N1 P1	2.12835e+07	2.35032e+07	1.72683e+07	1.78145e+07	1.50566e+07	3.67351e+07	3.74029e+07	3.05996e+07	2.94626e+07	1.96318e+07	2.20414e+07	2.49581e+07	2.49002e+07	2.37208e+07	2.36802e+07	2.14892e+07	2.41941e+07
PC(35:3)	PC	M+H	770.569	12.4069	C43 H81 O8 N1 P1	1.66502e+09	1.76358e+09	1.49661e+09	1.76977e+09	1.14252e+09	1.23984e+09	1.1832e+09	1.46951e+09	1.53078e+09	1.03199e+09	1.43158e+09	1.41815e+09	1.39916e+09	1.39952e+09	1.37886e+09	1.40311e+09	1.41866e+09
PC(15:0_20:3)	PC	M+H	770.569	15.042	C43 H81 O8 N1 P1	1.76517e+09	1.79717e+09	1.5233e+09	1.9425e+09	1.30645e+09	2.83305e+09	2.51977e+09	2.44725e+09	2.39308e+09	1.67295e+09	1.92507e+09	1.96118e+09	1.889e+09	1.9409e+09	1.83255e+09	1.8517e+09	1.88732e+09
PC(35:3e)	PC	M+H	756.59	16.615	C43 H83 O7 N1 P1	1.81661e+07	2.0002e+07	1.52655e+07	1.79354e+07	9.9434e+06	2.44017e+07	2.48144e+07	3.34555e+07	1.98509e+07	1.58745e+07	1.89633e+07	1.82577e+07	1.86039e+07	2.08628e+07	2.07028e+07	1.82663e+07	2.1816e+07
PC(35:4)	PC	M+H	768.554	11.962	C43 H79 O8 N1 P1	1.27352e+09	1.39014e+09	1.18e+09	1.55944e+09	1.00246e+09	1.3638e+09	1.53358e+09	1.33785e+09	1.71431e+09	1.40599e+09	1.29035e+09	1.30953e+09	1.32126e+09	1.31611e+09	1.28719e+09	1.28024e+09	1.31585e+09
PC(35:4e)	PC	M+H	754.575	15.6993	C43 H81 O7 N1 P1	3.70577e+07	4.27426e+07	4.69341e+07	5.21309e+07	2.9734e+07	7.58144e+07	7.33329e+07	6.92833e+07	7.07292e+07	4.52572e+07	4.80024e+07	5.07623e+07	4.68076e+07	4.52469e+07	4.51259e+07	4.73615e+07	4.74096e+07
PC(35:5)	PC	M+H	766.538	13.1822	C43 H77 O8 N1 P1	6.84299e+09	8.09718e+09	7.22554e+09	7.4778e+09	6.13426e+09	8.23555e+09	7.37864e+09	8.28615e+09	7.3704e+09	6.79944e+09	7.2529e+09	7.29992e+09	7.19458e+09	7.22749e+09	7.17924e+09	7.17838e+09	7.22885e+09
PC(22:5_13:0)	PC	M+H	766.538	13.5474	C43 H77 O8 N1 P1	1.33058e+09	1.38351e+09	1.18097e+09	1.48646e+09	1.09818e+09	2.56098e+09	1.80188e+09	1.6907e+09	1.95213e+09	1.41088e+09	1.4939e+09	1.47745e+09	1.51335e+09	1.40225e+09	1.43644e+09	1.47798e+09	1.43581e+09
PC(35:6)	PC	M+H	764.522	12.6341	C43 H75 O8 N1 P1	1.18578e+10	1.14193e+10	1.08386e+10	1.07063e+10	1.09057e+10	1.20635e+10	1.2704e+10	1.13853e+10	1.04755e+10	1.10332e+10	1.17124e+10	1.15749e+10	1.15294e+10	1.15945e+10	1.14436e+10	1.16843e+10	1.16432e+10
PC(36:0e)	PC	M+H	776.653	17.3049	C44 H91 O7 N1 P1	5.75841e+07	6.40214e+07	5.25711e+07	6.67938e+07	4.08522e+07	7.48948e+07	9.57184e+07	7.3787e+07	7.49405e+07	5.8088e+07	5.97479e+07	6.08364e+07	6.20274e+07	5.74884e+07	5.59454e+07	5.79489e+07	5.67016e+07
PC(36:1e)	PC	M+H	774.637	16.1373	C44 H89 O7 N1 P1	3.85464e+08	4.95658e+08	3.56996e+08	3.36984e+08	2.2615e+08	4.91532e+08	5.7623e+08	3.96951e+08	5.7799e+08	4.0908e+08	3.99261e+08	4.02787e+08	4.01074e+08	4.02882e+08	3.81685e+08	3.89348e+08	4.01558e+08
PC(16:0_20:2)	PC	M+H	786.601	18.579	C44 H85 O8 N1 P1	2.57514e+06	3.72757e+06	1.85025e+06	1.90204e+06	9.06967e+06	1.10525e+07	4.47337e+06	4.40186e+06	4.94573e+06	5.56867e+06	6.79763e+06	3.21695e+06	6.79095e+06	1.44687e+06	3.31749e+06	2.96404e+06	1.03921e+07
PC(20:2e_16:0)	PC	M+H	772.621	17.165	C44 H87 O7 N1 P1	2.39742e+08	2.05669e+08	1.94095e+08	2.1894e+08	2.10938e+08	3.01621e+08	3.30016e+08	2.82937e+08	2.44566e+08	2.63819e+08	2.35166e+08	2.66294e+08	2.57208e+08	2.566e+08	2.53053e+08	2.61415e+08	2.63039e+08
PC(18:0_18:3)	PC	M+H	784.585	10.5296	C44 H83 O8 N1 P1	4.86112e+06	9.51773e+06	6.00955e+06	6.18346e+06	3.46935e+06	5.17076e+06	2.5888e+06	3.80419e+06	7.1842e+06	4.80319e+06	4.35529e+06	3.61917e+06	4.27955e+06	4.84818e+06	4.6414e+06	3.86662e+06	4.22235e+06
PC(14:0_22:3)	PC	M+H	784.585	16.974	C44 H83 O8 N1 P1	7.95621e+06	9.66218e+06	6.08267e+06	1.03769e+07	5.34638e+06	9.48734e+06	7.7942e+06	1.03465e+07	1.05816e+07	7.27762e+06	8.65923e+06	8.09027e+06	7.33844e+06	7.90372e+06	8.76824e+06	8.27931e+06	9.37554e+06
PC(36:3e)	PC	M+H	770.606	13.8572	C44 H85 O7 N1 P1	2.12308e+08	2.67758e+08	2.36803e+08	2.76265e+08	1.65637e+08	2.70413e+08	3.77041e+08	4.07963e+08	2.43893e+08	2.02758e+08	2.48958e+08	2.55781e+08	2.39665e+08	2.53639e+08	2.43438e+08	2.48161e+08	2.47455e+08
PC(16:1e_20:2)	PC	M+H	770.606	16.165	C44 H85 O7 N1 P1	3.12993e+07	3.50721e+07	2.75749e+07	3.34765e+07	1.6878e+07	3.49891e+07	5.05751e+07	4.77378e+07	3.51023e+07	2.71736e+07	3.06605e+07	3.1858e+07	2.99977e+07	3.11543e+07	2.9861e+07	3.17301e+07	3.10044e+07
PC(18:2_18:2)	PC	M+Na	804.551	11.8816	C44 H80 O8 N1 P1 Na1	1.88884e+09	1.71738e+09	1.67119e+09	1.84089e+09	1.46277e+09	1.87437e+09	1.97302e+09	2.00434e+09	1.8952e+09	1.73889e+09	1.65486e+09	1.72522e+09	1.77609e+09	1.69837e+09	1.82314e+09	1.68405e+09	1.84081e+09
PC(18:4_18:0)	PC	M+H	782.569	15.06	C44 H81 O8 N1 P1	8.56785e+08	9.95024e+08	7.36709e+08	8.65846e+08	5.92076e+08	9.68557e+08	1.0035e+09	8.77676e+08	9.70935e+08	7.11665e+08	8.48506e+08	8.29935e+08	8.06422e+08	7.50373e+08	8.08768e+08	7.83856e+08	8.02577e+08
PC(22:3_14:1)	PC	M+H	782.569	16.9652	C44 H81 O8 N1 P1	1.79645e+07	2.24637e+07	1.50367e+07	5.01042e+07	1.33265e+07	2.4111e+07	2.867e+07	9.18465e+06	2.6105e+07	2.00421e+07	2.1152e+07	1.98926e+07	2.09411e+07	2.05396e+07	4.94373e+06	1.78519e+07	1.00343e+07
PC(26:0_10:4)	PC	M+H	782.569	18.701	C44 H81 O8 N1 P1	1.0817e+07	1.44307e+07	1.03982e+07	1.18696e+07	1.00573e+07	3.34251e+06	5.78365e+06	1.37462e+07	3.57857e+07	1.32464e+07	2.08949e+07	1.21983e+07	1.36559e+07	1.25667e+07	1.44576e+07	7.40037e+06	268461
PC(36:4e)	PC	M+H	768.59	13.5565	C44 H83 O7 N1 P1	1.15107e+09	1.37512e+09	1.301e+09	1.28975e+09	9.03788e+08	1.49801e+09	2.56435e+09	1.51093e+09	1.44288e+09	1.15533e+09	1.32765e+09	1.28168e+09	1.26642e+09	1.20312e+09	1.26789e+09	1.23065e+09	1.2514e+09
PC(16:1e_20:3)	PC	M+H	768.59	14.9165	C44 H83 O7 N1 P1	1.48763e+08	1.60087e+08	1.65647e+08	1.71535e+08	1.37372e+08	1.40314e+08	1.82121e+08	1.824e+08	1.70835e+08	1.52712e+08	1.59354e+08	1.60595e+08	1.60229e+08	1.65496e+08	1.71772e+08	1.6464e+08	1.57332e+08
PC(18:3_18:2)	PC	M+Na	802.536	10.8326	C44 H78 O8 N1 P1 Na1	3.61632e+08	2.71978e+08	2.44469e+08	2.84382e+08	2.3431e+08	2.90251e+08	3.02166e+08	2.94009e+08	2.88873e+08	2.13333e+08	2.81065e+08	2.74561e+08	2.78095e+08	2.78255e+08	2.8518e+08	2.8322e+08	2.7664e+08
PC(16:1_20:4)	PC	M+Na	802.536	11.3351	C44 H78 O8 N1 P1 Na1	4.82622e+08	5.34151e+08	5.29912e+08	5.23656e+08	4.77902e+08	4.92231e+08	4.55858e+08	5.03758e+08	5.01121e+08	4.81961e+08	5.1935e+08	5.13468e+08	5.21098e+08	5.09924e+08	5.1054e+08	5.09885e+08	5.15511e+08
PC(16:0_20:5)	PC	M+Na	802.536	11.6949	C44 H78 O8 N1 P1 Na1	2.20369e+08	2.02211e+08	2.22805e+08	2.27485e+08	2.64962e+08	2.51939e+08	2.4019e+08	2.50226e+08	2.27968e+08	2.65167e+08	2.50573e+08	2.44874e+08	2.48285e+08	2.55385e+08	2.56618e+08	2.54785e+08	2.51326e+08
PC(36:5)	PC	M+H	780.554	11.6949	C44 H79 O8 N1 P1	6.26526e+09	7.12305e+09	6.45665e+09	7.90091e+09	6.02148e+09	9.53913e+09	7.13688e+09	9.50435e+09	9.66156e+09	6.35652e+09	7.72598e+09	7.57761e+09	7.46217e+09	7.51281e+09	7.42576e+09	7.70753e+09	7.63085e+09
PC(18:4_18:1)	PC	M+H	780.554	13.2501	C44 H79 O8 N1 P1	1.02794e+07	2.69355e+07	4.43631e+07	3.28711e+07	7.85287e+06	5.43104e+07	9.5183e+06	4.86231e+07	7.10297e+07	7.65191e+06	4.2171e+07	4.0884e+07	6.65976e+07	7.67535e+06	5.40298e+07	7.69293e+07	4.31369e+07
PC(14:0_22:5)	PC	M+H	780.554	14.2612	C44 H79 O8 N1 P1	1.2948e+07	1.34954e+07	7.71118e+06	8.28274e+06	9.44349e+06	1.41636e+07	1.36516e+07	1.11927e+07	1.43806e+07	9.86441e+06	1.44118e+07	1.26772e+07	1.27627e+07	1.28979e+07	9.1097e+06	7.25773e+06	1.10958e+07
PC(36:5e)	PC	M+H	766.575	13.3105	C44 H81 O7 N1 P1	9.1199e+08	1.12862e+09	2.79723e+08	2.58171e+08	2.04986e+08	9.86141e+08	3.6436e+08	9.71894e+08	2.02857e+08	1.37412e+08	1.84116e+08	1.92459e+08	1.77219e+08	1.81422e+08	1.98452e+08	2.03172e+08	1.84849e+08
PC(16:2e_20:3)	PC	M+H	766.575	13.8502	C44 H81 O7 N1 P1	3.55393e+07	3.47248e+07	3.52016e+07	2.94618e+07	2.01432e+07	1.91086e+07	3.2417e+07	3.27475e+07	2.37251e+07	2.51249e+07	3.05458e+07	2.84467e+07	2.86052e+07	2.98528e+07	2.82796e+07	2.90589e+07	2.85949e+07
PC(14:1e_22:4)	PC	M+H	766.575	15.3609	C44 H81 O7 N1 P1	5.43186e+06	3.10808e+06	4.98761e+06	7.50524e+06	2.92025e+06	5.63642e+06	1.2432e+07	734449	2.74398e+06	1.25014e+06	2.13089e+06	2.72854e+06	2.27186e+06	3.48016e+06	1.83246e+06	5.0542e+06	4.52836e+06
PC(16:1e_20:4)	PC	M+H	766.575	15.741	C44 H81 O7 N1 P1	8.29727e+06	1.07182e+07	9.74919e+06	1.19643e+07	6660302	1.67456e+07	1.7368e+07	1.25251e+07	1.30151e+07	8.25876e+06	1.07318e+07	1.18135e+07	9.4981e+06	9.79239e+06	9.87311e+06	1.04534e+07	1.04562e+07
PC(14:0_22:6)	PC	M+Na	800.52	10.777	C44 H76 O8 N1 P1 Na1	4.93264e+07	5.80287e+07	6.07466e+07	7.54923e+07	4.11761e+07	7.78933e+07	9.20495e+07	7.76024e+07	8.96057e+07	5.44682e+07	6.53375e+07	6.22033e+07	6.08822e+07	6.37635e+07	6.18904e+07	6.235e+07	6.08473e+07
PC(36:6)	PC	M+H	778.538	10.777	C44 H77 O8 N1 P1	5.76352e+08	8.20095e+08	6.84177e+08	8.65977e+08	5.14717e+08	1.03703e+09	1.29477e+09	9.70871e+08	1.20165e+09	6.69991e+08	8.12699e+08	7.67387e+08	7.69692e+08	7.60057e+08	7.66366e+08	7.34792e+08	7.50847e+08
PC(36:6e)	PC	M+H	764.559	11.6204	C44 H79 O7 N1 P1	1.49953e+06	1.07804e+06	1.71619e+06	460748	275055	2.2987e+06	5.57734e+06	2.07374e+06	5.16968e+06	1.14399e+06	1.29639e+06	951168	1.3384e+06	2.33956e+06	3.3114e+06	4.0913e+06	1.2361e+06
PC(36:7)	PC	M+H	776.522	10.5704	C44 H75 O8 N1 P1	4.54831e+07	5.02508e+07	3.36605e+07	5.7978e+07	3.67679e+07	8.51444e+07	8.1745e+07	4.85664e+07	9.10939e+07	3.99221e+07	5.31516e+07	5.37558e+07	4.9187e+07	4.88806e+07	4.28269e+07	4.82718e+07	4.82805e+07
PC(14:1e_22:6)	PC	M+H	762.543	13.788	C44 H77 O7 N1 P1	2.65114e+06	2.9111e+06	4.01706e+06	3.95957e+06	3.42513e+06	1.04998e+07	1.02228e+07	4.57811e+06	5.22179e+06	3.89422e+06	4.55827e+06	5.25114e+06	5.06954e+06	6.27124e+06	4.18444e+06	7.2028e+06	4.89518e+06
PC(36:8)	PC	M+H	774.507	12.458	C44 H73 O8 N1 P1	5.02211e+06	6.23532e+06	6.44617e+06	4.85182e+06	5.59329e+06	6.55626e+06	3.20701e+06	5.90134e+06	4.87355e+06	4.35947e+06	5.5744e+06	5.62139e+06	4.85734e+06	3.98425e+06	5.40058e+06	4.07651e+06	6.32117e+06
PC(37:0)	PC	M+H	804.648	16.9624	C45 H91 O8 N1 P1	9.2878e+06	1.19973e+07	9.8445e+06	1.04105e+07	6.91976e+06	1.20075e+07	1.54183e+07	1.30319e+07	1.34767e+07	9.16332e+06	8.86951e+06	1.0637e+07	1.14931e+07	8.64541e+06	9.57885e+06	9.30357e+06	1.00285e+07
PC(37:1)	PC	M+H	802.632	15.833	C45 H89 O8 N1 P1	1.20931e+08	1.40366e+08	1.2156e+08	1.92673e+08	1.02962e+08	1.88698e+08	1.59214e+08	2.31576e+08	1.95732e+08	1.43337e+08	1.54471e+08	1.49896e+08	1.44451e+08	1.4022e+08	1.53631e+08	1.49261e+08	1.47533e+08
PC(19:0_18:2)	PC	M+Na	822.598	15.0321	C45 H86 O8 N1 P1 Na1	2.54153e+08	2.55483e+08	2.17828e+08	2.19105e+08	1.74085e+08	1.85259e+08	1.97324e+08	2.38557e+08	2.16529e+08	2.03453e+08	2.16704e+08	2.18617e+08	2.24452e+08	2.16327e+08	2.23171e+08	2.13535e+08	2.10926e+08
PC(37:2)	PC	M+H	800.616	15.0321	C45 H87 O8 N1 P1	3.70799e+09	4.14514e+09	3.27216e+09	3.86622e+09	2.54859e+09	3.83448e+09	3.80389e+09	4.22574e+09	4.25241e+09	3.16462e+09	3.7244e+09	3.56169e+09	3.57111e+09	3.5448e+09	3.43401e+09	3.58482e+09	3.46503e+09
PC(19:1_18:1)	PC	M+H	800.616	16.867	C45 H87 O8 N1 P1	4.81326e+07	5.56079e+07	4.60519e+07	5.60101e+07	3.59162e+07	5.84327e+07	4.20531e+07	8.65031e+07	6.10688e+07	4.46454e+07	5.5684e+07	5.41064e+07	5.16778e+07	4.90446e+07	5.1747e+07	5.10935e+07	5.48182e+07
PC(37:2e)	PC	M+H	786.637	17.171	C45 H89 O7 N1 P1	2.70737e+07	3.06191e+07	2.7589e+07	2.2961e+07	2.16993e+07	2.92088e+07	3.14576e+07	2.83273e+07	2.33262e+07	2.55763e+07	2.47256e+07	3.85731e+07	2.84584e+07	3.38623e+07	2.86342e+07	3.24397e+07	2.89149e+07
PC(37:3)	PC	M+H	798.601	16.3283	C45 H85 O8 N1 P1	4.64777e+07	4.85183e+07	4.19274e+07	5.0356e+07	3.63903e+07	6.6051e+07	5.03833e+07	6.41636e+07	6.65671e+07	3.9503e+07	4.80215e+07	4.7666e+07	4.79104e+07	4.89137e+07	4.71089e+07	4.95024e+07	4.77019e+07
PC(37:3e)	PC	M+H	784.621	16.689	C45 H87 O7 N1 P1	1.71927e+06	2.02093e+06	828115	725440	65829.2	1.26411e+06	3.3273e+06	835500	1.741e+06	312936	745438	1.33456e+06	953679	1.09028e+06	1.43785e+06	803899	309879
PC(37:4)	PC	M+H	796.585	12.533	C45 H83 O8 N1 P1	9.89666e+07	1.36774e+08	1.09134e+08	1.26036e+08	8.05382e+07	1.00402e+08	7.75337e+07	1.38316e+08	1.07352e+08	7.5252e+07	1.02881e+08	1.02647e+08	1.05017e+08	9.48788e+07	1.01049e+08	1.02424e+08	9.97424e+07
PC(37:4e)	PC	M+H	782.606	16.5596	C45 H85 O7 N1 P1	3.21317e+07	4.06341e+07	3.20214e+07	3.83415e+07	2.84686e+07	6.39868e+07	5.58512e+07	5.14247e+07	5.42374e+07	4.30831e+07	4.37518e+07	4.31807e+07	3.84139e+07	4.10557e+07	3.94679e+07	3.86894e+07	4.17377e+07
PC(37:5)	PC	M+H	794.569	14.4784	C45 H81 O8 N1 P1	5.20772e+08	5.39289e+08	4.98968e+08	5.60509e+08	4.91759e+08	6.54859e+08	6.82331e+08	5.80664e+08	6.26192e+08	5.41561e+08	5.52462e+08	5.67469e+08	5.43696e+08	5.59875e+08	5.42052e+08	5.22225e+08	5.47311e+08
PC(15:0_22:5)	PC	M+H	794.569	14.9742	C45 H81 O8 N1 P1	4.83561e+08	5.017e+08	4.37265e+08	5.1127e+08	4.20272e+08	7.47396e+08	8.72192e+08	6.63216e+08	5.89878e+08	5.1972e+08	5.37289e+08	5.28349e+08	5.53099e+08	5.10307e+08	4.97685e+08	5.24792e+08	5.01416e+08
PC(37:5e)	PC	M+H	780.59	14.929	C45 H83 O7 N1 P1	3.87001e+07	5.47131e+07	5.05326e+07	6.00365e+07	3.82887e+07	6.52145e+07	7.5264e+07	5.61903e+07	6.11803e+07	5.27641e+07	5.01202e+07	4.94562e+07	5.33912e+07	4.79355e+07	4.95453e+07	5.07419e+07	4.82947e+07
PC(37:6)	PC	M+H	792.554	12.498	C45 H79 O8 N1 P1	5.01778e+08	4.96721e+08	3.86103e+08	4.63056e+08	3.30689e+08	7.06718e+08	7.30099e+08	4.77581e+08	7.00125e+08	4.3785e+08	4.95462e+08	4.58025e+08	4.66782e+08	4.70018e+08	4.75635e+08	4.78377e+08	4.8302e+08
PC(38:0)	PC	M+H	818.663	17.391	C46 H93 O8 N1 P1	5.50784e+06	7.40044e+06	6.17747e+06	6.43424e+06	3.9195e+07	7.865e+06	7.08259e+06	6.94989e+06	9.36625e+06	5.48576e+06	6.44498e+06	6.73802e+06	5.79757e+06	5.83409e+06	6.23725e+06	6.60991e+06	5.86611e+06
PC(38:0e)	PC	M+H	804.684	18.1814	C46 H95 O7 N1 P1	1.59337e+07	1.86442e+07	1.74689e+07	1.80249e+07	1.09998e+07	2.73554e+07	3.65682e+07	2.74586e+07	2.32437e+07	2.07004e+07	2.16016e+07	2.00804e+07	1.93486e+07	2.01315e+07	1.89594e+07	1.99272e+07	1.79956e+07
PC(38:2)	PC	M+H	814.632	15.6612	C46 H89 O8 N1 P1	7.59772e+09	8.78484e+09	6.29975e+09	7.62189e+09	5.33784e+09	6.76522e+09	5.54065e+09	8.30841e+09	7.90284e+09	6.16689e+09	7.56498e+09	6.78739e+09	7.2068e+09	7.2192e+09	6.97006e+09	6.47468e+09	6.54007e+09
PC(38:2e)	PC	M+H	800.653	16.4341	C46 H91 O7 N1 P1	1.55701e+08	1.78156e+08	1.21979e+08	1.30551e+08	7.77447e+07	1.41928e+08	2.08054e+08	1.57618e+08	1.88119e+08	1.44041e+08	1.4195e+08	1.40682e+08	1.3633e+08	1.36105e+08	1.34461e+08	1.39643e+08	1.36605e+08
PC(18:0_20:3)	PC	M+Na	834.598	14.6849	C46 H86 O8 N1 P1 Na1	5.22161e+08	4.97956e+08	5.61363e+08	5.42924e+08	5.6098e+08	5.76429e+08	5.30051e+08	5.38033e+08	5.01177e+08	3.0603e+08	5.528e+08	5.36298e+08	5.53465e+08	5.42487e+08	5.55091e+08	5.35802e+08	5.48162e+08
PC(38:3e)	PC	M+H	798.637	15.1126	C46 H89 O7 N1 P1	3.15444e+07	5.54956e+07	5.13844e+07	3.13704e+07	2.63137e+07	4.89077e+07	7.60511e+07	6.10184e+07	3.38451e+07	3.93983e+07	4.94501e+07	3.27318e+07	5.01071e+07	4.79669e+07	3.3096e+07	4.33638e+07	4.66715e+07
PC(18:3e_20:0)	PC	M+H	798.637	15.5344	C46 H89 O7 N1 P1	1.77658e+07	2.22512e+07	1.59758e+07	1.65772e+07	1.22878e+07	2.23499e+07	3.11342e+07	2.31398e+07	2.27403e+07	1.60065e+07	1.78704e+07	1.78271e+07	1.79951e+07	1.7311e+07	1.59371e+07	1.78402e+07	1.67509e+07
PC(20:2e_18:1)	PC	M+H	798.637	17.304	C46 H89 O7 N1 P1	2.11766e+06	1.23561e+06	2.27989e+06	4.27837e+06	3.81434e+06	2.0884e+06	3.24297e+06	4.76098e+06	2.98333e+06	2.84538e+06	2.11006e+06	3.23822e+06	1.89331e+06	4.66881e+06	2.78405e+06	1.98659e+06	1.91676e+06
PC(20:1e_18:2)	PC	M+H	798.637	17.987	C46 H89 O7 N1 P1	1.47807e+07	1.58211e+07	9.96125e+06	1.34642e+07	1.12821e+07	3.38627e+07	3.42151e+07	2.085e+07	2.09594e+07	1.42505e+07	1.63973e+07	1.65583e+07	1.58476e+07	1.6368e+07	1.55239e+07	1.68071e+07	1.59381e+07
PC(16:0_22:4)	PC	M+H	810.601	15.8542	C46 H85 O8 N1 P1	1.90531e+08	1.18949e+07	1.57304e+07	2.73379e+07	1.82536e+07	2.72952e+07	2.571e+08	2.65176e+07	2.33787e+08	1.94492e+07	2.05122e+07	1.80784e+07	1.85962e+07	1.4081e+07	1.85831e+07	1.85504e+08	2.30157e+07
PC(18:3e_20:1)	PC	M+H	796.621	14.5718	C46 H87 O7 N1 P1	1.23803e+08	1.57183e+08	1.54521e+08	1.7231e+08	9.47004e+07	1.08925e+08	2.11418e+08	1.49949e+08	1.22605e+08	1.30736e+08	1.35365e+08	1.16062e+08	1.41108e+08	1.35288e+08	1.25011e+08	1.26207e+08	1.48532e+08
PC(20:4e_18:0)	PC	M+Na	818.603	14.927	C46 H86 O7 N1 P1 Na1	3.53218e+07	3.99713e+07	3.62507e+07	3.40172e+07	2.88158e+07	2.6053e+07	4.736e+07	3.66537e+07	3.24113e+07	3.0207e+07	3.56818e+07	3.39677e+07	3.42491e+07	3.63157e+07	3.66517e+07	3.479e+07	3.5693e+07
PC(38:4e)	PC	M+H	796.621	14.927	C46 H87 O7 N1 P1	4.00039e+08	4.57518e+08	4.16125e+08	3.99007e+08	2.83253e+08	4.70054e+08	7.2014e+08	5.00075e+08	4.81781e+08	3.47422e+08	4.23007e+08	4.0257e+08	4.07756e+08	4.07293e+08	4.13372e+08	4.15542e+08	3.93394e+08
PC(16:1_22:4)	PC	M+H	808.585	15.724	C46 H83 O8 N1 P1	1.24252e+07	5.87746e+06	1.17921e+07	1.5823e+07	1.05034e+07	1.94354e+07	2.21192e+07	2.12739e+07	1.62258e+07	1.54669e+07	1.48324e+07	1.53202e+07	1.36556e+07	1.45478e+07	1.37566e+07	1.65861e+07	1.36742e+07
PC(38:5e)	PC	M+H	794.606	13.5771	C46 H85 O7 N1 P1	1.13034e+09	1.44628e+09	1.32359e+09	1.34086e+09	9.75142e+08	1.77515e+09	2.46224e+09	1.62945e+09	1.53283e+09	1.32165e+09	1.42457e+09	1.39473e+09	1.35183e+09	1.30807e+09	1.35461e+09	1.35586e+09	1.32829e+09
PC(16:1_22:5)	PC	M+H	806.569	19.434	C46 H81 O8 N1 P1	8.72169e+06	9.71438e+06	4.46622e+06	1.02762e+07	2.52028e+06	2.64911e+06	287003	1.7039e+06	2.94393e+06	4.79391e+06	5.09437e+06	3.86776e+06	4.5775e+06	1.03173e+07	6.76794e+06	1.76402e+06	3.11247e+06
PC(38:6e)	PC	M+H	792.59	13.1122	C46 H83 O7 N1 P1	1.37152e+08	1.9693e+08	2.13846e+08	1.60723e+08	1.27931e+08	1.59195e+08	3.12153e+08	1.56889e+08	2.06163e+08	1.48202e+08	1.73853e+08	1.56177e+08	1.67236e+08	1.60101e+08	1.77437e+08	1.78884e+08	1.68217e+08
PC(38:7)	PC	M+H	804.554	12.4715	C46 H79 O8 N1 P1	5.67505e+07	5.89176e+07	6.57513e+07	6.92195e+07	5.11083e+07	5.61266e+07	4.71236e+07	5.74444e+07	5.43437e+07	5.65456e+07	5.62086e+07	6.03753e+07	5.64645e+07	5.90731e+07	6.00132e+07	5.86373e+07	5.75313e+07
PC(18:4_20:3)	PC	M+H	804.554	13.3622	C46 H79 O8 N1 P1	1.37934e+07	1.92609e+07	1.13221e+07	1.24736e+07	1.24147e+07	2.158e+07	1.19634e+07	2.06965e+07	8.00801e+06	8.22069e+06	1.80615e+07	7.81366e+06	1.4039e+07	1.47095e+07	1.37815e+07	1.19091e+07	1.66669e+07
PC(38:7e)	PC	M+H	790.575	13.5593	C46 H81 O7 N1 P1	6.61706e+07	6.8321e+07	7.07949e+07	6.20317e+07	6.86559e+07	4.79102e+07	7.90086e+07	5.64414e+07	4.80405e+07	6.46095e+07	6.37151e+07	6.1183e+07	6.04906e+07	5.75512e+07	6.12324e+07	5.96013e+07	6.10399e+07
PC(38:8)	PC	M+H	802.538	11.346	C46 H77 O8 N1 P1	4.82622e+08	5.34151e+08	5.29912e+08	5.23656e+08	4.77902e+08	4.92231e+08	4.55858e+08	5.03758e+08	5.01121e+08	4.81961e+08	5.1935e+08	5.13468e+08	5.21098e+08	5.09924e+08	5.1054e+08	5.09885e+08	5.15511e+08
PC(38:9)	PC	M+H	800.522	10.7722	C46 H75 O8 N1 P1	4.94128e+07	5.33092e+07	6.07532e+07	7.54923e+07	4.08669e+07	7.63277e+07	8.59043e+07	76940858	8.86278e+07	5.37154e+07	6.48106e+07	6.12191e+07	5.93138e+07	6.24146e+07	6.14861e+07	6.16723e+07	6.05454e+07
PC(16:0_23:0)	PC	M+H	832.679	17.119	C47 H95 O8 N1 P1	1.11168e+08	1.24629e+08	8.91892e+07	1.3482e+08	9.59159e+07	1.7897e+08	2.19776e+08	1.87278e+08	1.17802e+08	1.29256e+08	1.24843e+08	1.37764e+08	1.28432e+08	1.28051e+08	1.26872e+08	1.26176e+08	1.29241e+08
PC(39:0)	PC	M+H	832.679	18.0448	C47 H95 O8 N1 P1	5.09713e+06	6.52003e+06	7.3684e+06	9.65054e+06	4.4746e+06	5.41499e+06	2.02501e+07	9.55954e+06	8.1504e+06	5.12336e+06	8.62605e+06	5.99876e+06	7.16829e+06	6.10052e+06	5.06336e+06	5.64992e+06	8.19965e+06
PC(39:2)	PC	M+H	828.648	18.263	C47 H91 O8 N1 P1	5.99257e+07	5.6961e+07	5.02094e+07	7.8397e+07	3.03567e+07	1.83425e+08	2.13503e+08	5.90937e+07	1.20956e+08	7.64711e+07	8.8302e+07	8.3361e+07	8.24901e+07	8.56839e+07	8.42058e+07	8.14991e+07	8.492e+07
PC(39:3e)	PC	M+H	812.653	18.3193	C47 H91 O7 N1 P1	1.05273e+08	8.86526e+07	8.29301e+07	1.08869e+08	7.6571e+07	2.58465e+08	2.65496e+08	1.46713e+08	1.4461e+08	1.23283e+08	1.37274e+08	1.15284e+08	1.19088e+08	1.33999e+08	1.32892e+08	1.03369e+08	1.1919e+08
PC(39:4)	PC	M+H	824.616	14.7786	C47 H87 O8 N1 P1	1.6994e+09	2.07443e+09	1.62885e+09	1.79404e+09	1.28672e+09	1.51728e+09	1.64297e+09	1.79437e+09	1.82056e+09	1.48733e+09	1.60934e+09	1.61282e+09	1.58823e+09	1.54027e+09	1.53061e+09	1.61607e+09	1.54673e+09
PC(19:1_20:3)	PC	M+Na	846.598	15.263	C47 H86 O8 N1 P1 Na1	1.26759e+07	1.27376e+07	1.04997e+07	1.01201e+07	1.06869e+07	8.5253e+06	5.39585e+06	1.21624e+07	1.31611e+07	7.28672e+06	1.10796e+07	1.03122e+07	9.92796e+06	9.9166e+06	9.04276e+06	8.8408e+06	1.02341e+07
PC(39:4e)	PC	M+H	810.637	17.3127	C47 H89 O7 N1 P1	1.5594e+06	803520	518313	2.6705e+06	1.72172e+06	5.56202e+06	3.65051e+06	3.32753e+06	4.85259e+06	3.79606e+06	2.1768e+06	2.50494e+06	1.11381e+06	2.50306e+06	1.30227e+06	3.11627e+06	2.6183e+06
PC(39:5)	PC	M+H	822.601	15.707	C47 H85 O8 N1 P1	7.68533e+07	8.45392e+07	7.01032e+07	7.57947e+07	5.58006e+07	8.48317e+07	6.60335e+07	8.85142e+07	8.81272e+07	5.7114e+07	7.41473e+07	6.84204e+07	6.96447e+07	7.13534e+07	6.65645e+07	7.02707e+07	7.14396e+07
PC(39:5e)	PC	M+H	808.621	16.9337	C47 H87 O7 N1 P1	5.97612e+06	5.74995e+06	7.83651e+06	9.41426e+06	5.21002e+06	7.72284e+06	1.60907e+07	9.07243e+06	6.46871e+06	4.11813e+06	8.05074e+06	7.79767e+06	7.20623e+06	6.76057e+06	7.29057e+06	6.76532e+06	6.77538e+06
PC(39:6)	PC	M+H	820.585	13.0023	C47 H83 O8 N1 P1	2.95984e+08	3.20126e+08	2.78961e+08	2.75292e+08	2.79289e+08	2.55957e+08	3.182e+08	2.50716e+08	2.49677e+08	2.74674e+08	2.68961e+08	2.69641e+08	2.67795e+08	2.65379e+08	2.71628e+08	2.56914e+08	2.62814e+08
PC(39:7)	PC	M+H	818.569	11.6431	C47 H81 O8 N1 P1	4.82854e+08	5.6706e+08	5.0528e+08	5.70861e+08	4.07092e+08	4.3834e+08	4.29706e+08	4.67292e+08	4.45029e+08	3.98657e+08	4.55092e+08	4.61092e+08	4.57573e+08	4.38224e+08	4.21309e+08	4.5367e+08	4.52523e+08
PC(40:0)	PC	M+H	846.695	18.4249	C48 H97 O8 N1 P1	4.14524e+07	4.52492e+07	4.17239e+07	5.6797e+07	3.12043e+07	5.97832e+07	8.87525e+07	5.29563e+07	6.81029e+07	3.37298e+07	5.04475e+07	4.38573e+07	4.35376e+07	4.59567e+07	4.35827e+07	4.7179e+07	4.68754e+07
PC(40:0e)	PC	M+H	832.715	18.9022	C48 H99 O7 N1 P1	8.87864e+06	1.15749e+07	9.73171e+06	1.02091e+07	7.1397e+06	1.78621e+07	2.5221e+07	1.63627e+07	1.10568e+07	1.50623e+07	1.71592e+07	1.72907e+07	1.51452e+07	7.15974e+06	1.51384e+07	1.60377e+07	1.69741e+07
PC(40:10)	PC	M+H	826.538	10.5838	C48 H77 O8 N1 P1	1.86436e+08	2.09875e+08	1.42013e+08	1.84046e+08	1.26713e+08	3.02318e+08	2.58089e+08	2.37779e+08	2.7851e+08	1.45916e+08	1.96889e+08	2.08935e+08	1.72641e+08	1.81448e+08	1.82993e+08	1.7112e+08	1.91178e+08
PC(40:2e)	PC	M+H	828.684	17.493	C48 H95 O7 N1 P1	2.11915e+07	2.10291e+07	1.59378e+07	1.91651e+07	1.4206e+07	2.9247e+07	2.7626e+07	3.05423e+07	3.41316e+07	2.53242e+07	2.19282e+07	2.19618e+07	2.07061e+07	2.16288e+07	1.99706e+07	2.26202e+07	2.1646e+07
PC(40:3)	PC	M+H	840.648	16.3628	C48 H91 O8 N1 P1	8.45106e+06	1.05929e+07	9.70984e+06	8.40073e+06	6.83818e+06	1.11469e+07	5.06717e+06	1.22473e+07	1.57125e+07	6.51255e+06	7.31953e+06	8.78806e+06	9.51247e+06	7.57886e+06	9.07412e+06	7.98279e+06	6.91506e+06
PC(40:3e)	PC	M+H	826.668	18.534	C48 H93 O7 N1 P1	1.48496e+07	1.88912e+07	1.37164e+07	1.05768e+07	1.36668e+07	1.2338e+07	1.2981e+07	1.89195e+07	3.09751e+07	1.245e+07	1.21767e+07	1.21489e+07	1.57333e+07	1.72379e+07	1.91595e+07	1.44786e+07	1.99133e+07
PC(18:0_22:4)	PC	M+Na	860.614	15.0443	C48 H88 O8 N1 P1 Na1	9.72746e+07	7.21784e+07	8.44649e+07	1.14964e+08	7.90783e+07	7.94479e+07	1.09158e+08	7.99058e+07	9.25639e+07	9.97163e+07	9.61699e+07	9.72359e+07	9.35955e+07	9.33754e+07	9.54205e+07	9.23978e+07	9.51499e+07
PC(40:4)	PC	M+H	838.632	15.3997	C48 H89 O8 N1 P1	2.14429e+09	2.45134e+09	1.82591e+09	1.86651e+09	1.49232e+09	1.20431e+09	9.80432e+08	1.61655e+09	1.84253e+09	1.23433e+09	1.64048e+09	1.62141e+09	1.70714e+09	1.66372e+09	1.59961e+09	1.64843e+09	1.6723e+09
PC(40:4e)	PC	M+H	824.653	16.172	C48 H91 O7 N1 P1	1.15794e+08	1.34408e+08	9.58743e+07	1.30627e+08	8.69701e+07	1.72793e+08	2.12924e+08	1.72835e+08	1.81224e+08	1.27587e+08	1.36702e+08	1.39792e+08	1.31018e+08	1.35205e+08	1.30229e+08	1.32845e+08	1.39218e+08
PC(40:5)	PC	M+H	836.616	14.6146	C48 H87 O8 N1 P1	1.37988e+09	1.46398e+09	1.31897e+09	1.46491e+09	1.23308e+09	1.42011e+09	1.74509e+09	1.68325e+09	1.35212e+09	1.6873e+09	1.43347e+09	1.40123e+09	1.47089e+09	1.47505e+09	1.47904e+09	1.42207e+09	1.4564e+09
PC(40:5e)	PC	M+H	822.637	14.9075	C48 H89 O7 N1 P1	7.79125e+07	9.34761e+07	7.07152e+07	8.78277e+07	5.93972e+07	1.05186e+08	1.44356e+08	9.6309e+07	1.02812e+08	7.10551e+07	7.76767e+07	7.39741e+07	7.62483e+07	6.87024e+07	7.19025e+07	7.09686e+07	9.20079e+07
PC(22:4_18:2)	PC	M+H	834.601	15.131	C48 H85 O8 N1 P1	1.23185e+08	1.30332e+08	1.37204e+08	1.50992e+08	1.14412e+08	1.80118e+08	1.34911e+08	1.63988e+08	1.51539e+08	1.49885e+08	1.40928e+08	1.43662e+08	1.39689e+08	1.36778e+08	1.4657e+08	1.38163e+08	1.3881e+08
PC(40:6e)	PC	M+H	820.621	14.486	C48 H87 O7 N1 P1	1.13146e+08	1.18771e+08	1.0834e+08	9.12043e+07	8.68934e+07	8.7075e+07	1.67763e+08	1.2245e+08	1.36395e+08	1.19692e+08	1.18588e+08	1.09242e+08	9.56167e+07	9.55777e+07	9.63876e+07	1.01699e+08	1.08784e+08
PC(22:5_18:2)	PC	M+H	832.585	11.6496	C48 H83 O8 N1 P1	2.4302e+08	2.53877e+08	2.11278e+08	2.29481e+08	1.98834e+08	3.56567e+08	3.58388e+08	2.35482e+08	2.92635e+08	2.67748e+08	2.62769e+08	2.72332e+08	2.49038e+08	2.34983e+08	2.45461e+08	2.59784e+08	2.18913e+08
PC(18:1_22:6)	PC	M+Na	854.567	12.3635	C48 H82 O8 N1 P1 Na1	3.17757e+08	3.07157e+08	3.45119e+08	3.16727e+08	3.23327e+08	3.09248e+08	2.79523e+08	2.86298e+08	2.57588e+08	3.27021e+08	3.19464e+08	3.08113e+08	3.06819e+08	3.14948e+08	3.18278e+08	3.05487e+08	3.19346e+08
PC(40:7e)	PC	M+H	818.606	13.1463	C48 H85 O7 N1 P1	1.44988e+08	1.75014e+08	1.68237e+08	1.56146e+08	1.22755e+08	1.9179e+08	3.45601e+08	1.66484e+08	1.80927e+08	1.73561e+08	1.70825e+08	1.72812e+08	1.71996e+08	1.79433e+08	1.68726e+08	1.70126e+08	1.73437e+08
PC(20:4_20:4)	PC	M+Na	852.551	11.1834	C48 H80 O8 N1 P1 Na1	6.71855e+08	6.58391e+08	6.51956e+08	6.00424e+08	6.20985e+08	6.79829e+08	6.3667e+08	6.66687e+08	5.95298e+08	6.80477e+08	6.46955e+08	6.51134e+08	6.66011e+08	6.54776e+08	6.62332e+08	6.71451e+08	6.68226e+08
PC(40:8)	PC	M+H	830.569	12.844	C48 H81 O8 N1 P1	1.40131e+08	1.19369e+08	1.47012e+08	1.33945e+08	1.53035e+08	8.29663e+07	8.66481e+07	1.16069e+08	9.53859e+07	1.15965e+08	1.16453e+08	1.20831e+08	1.28392e+08	1.21648e+08	1.3053e+08	1.27751e+08	1.34063e+08
PC(40:8e)	PC	M+H	816.59	13.5739	C48 H83 O7 N1 P1	6.28787e+07	7.21634e+07	7.56695e+07	6.19124e+07	6.9642e+07	5.60742e+07	7.99492e+07	5.54946e+07	5.82454e+07	7.23637e+07	6.7053e+07	6.51292e+07	6.15281e+07	6.15143e+07	6.33147e+07	6.67147e+07	6.01397e+07
PC(18:3_22:6)	PC	M+Na	850.536	10.1664	C48 H78 O8 N1 P1 Na1	9.48633e+06	1.6147e+07	8.49985e+06	1.07163e+07	7.60753e+06	2.14174e+07	1.68738e+07	1.43434e+07	1.55211e+07	8.51171e+06	1.09875e+07	1.09484e+07	1.09813e+07	9.87385e+06	1.01848e+07	1.17477e+07	1.07336e+07
PC(40:9)	PC	M+H	828.554	10.924	C48 H79 O8 N1 P1	4.60596e+07	6.46468e+07	5.26143e+07	6.49304e+07	4.21762e+07	8.80969e+07	8.04638e+07	5.23626e+07	6.91321e+07	5.55854e+07	5.07361e+07	4.7699e+07	5.29505e+07	5.1649e+07	4.5683e+07	5.74972e+07	6.29168e+07
PC(40:9e)	PC	M+H	814.575	11.765	C48 H81 O7 N1 P1	1.04446e+07	9.46985e+06	1.19332e+07	1.43688e+07	9.63088e+06	9.53354e+06	1.13444e+07	1.29e+07	7.49011e+06	7.83471e+06	6.29697e+06	1.20093e+07	1.25918e+07	9.11219e+06	1.23052e+07	5.58162e+06	6.80272e+06
PC(41:0)	PC	M+H	860.71	18.7742	C49 H99 O8 N1 P1	6.81321e+06	7.49552e+06	7.12622e+06	8.25581e+06	4.58456e+06	1.35249e+07	2.30268e+07	1.57823e+07	1.7232e+07	9.3022e+06	8.74601e+06	9.60965e+06	9.38307e+06	1.00774e+07	8.74995e+06	1.06086e+07	9.1069e+06
PC(25:1_16:0)	PC	M+H	858.695	18.0626	C49 H97 O8 N1 P1	1.52923e+07	1.38207e+07	1.47724e+07	1.81681e+07	9.13265e+06	2.01961e+07	2.29923e+07	1.5474e+07	1.94334e+07	1.18078e+07	1.47028e+07	1.32775e+07	1.33814e+07	1.38364e+07	1.34416e+07	1.33014e+07	1.19347e+07
PC(18:1_23:1)	PC	M+H	856.679	14.9637	C49 H95 O8 N1 P1	1.28308e+07	7.83247e+06	1.14403e+07	1.09068e+07	9.28893e+06	8.2162e+06	1.22833e+07	9.44256e+06	8.75432e+06	8.58984e+06	1.00425e+07	9.09643e+06	1.04104e+07	9.94917e+06	9.61744e+06	9.60809e+06	1.03746e+07
PC(41:2)	PC	M+H	856.679	17.3226	C49 H95 O8 N1 P1	5.55259e+07	5.48183e+07	4.64266e+07	4.61882e+07	3.27909e+07	4.09326e+07	4.87638e+07	5.19347e+07	5.98294e+07	3.37716e+07	5.18383e+07	5.28887e+07	5.19986e+07	5.02025e+07	4.12604e+07	4.32429e+07	5.18317e+07
PC(41:3)	PC	M+H	854.663	16.5348	C49 H93 O8 N1 P1	6.16668e+06	5.13169e+06	6.05144e+06	5.82287e+06	2.20118e+06	3.07805e+06	2.33578e+06	5.12957e+06	4.0161e+06	2.49359e+06	4.8843e+06	4.57787e+06	3.81867e+06	4.59443e+06	3.68734e+06	4.13759e+06	4.43439e+06
PC(41:3e)	PC	M+H	840.684	18.3415	C49 H95 O7 N1 P1	4.89694e+08	4.48207e+08	3.80274e+08	4.51071e+08	4.30794e+08	5.4616e+08	5.7287e+08	5.05909e+08	4.51579e+08	5.27431e+08	4.60316e+08	5.0481e+08	5.03417e+08	5.1169e+08	5.17144e+08	5.04241e+08	5.12765e+08
PC(20:4_21:0)	PC	M+Na	874.63	16.0205	C49 H90 O8 N1 P1 Na1	4.29677e+06	4.71454e+06	3.12562e+06	3.24099e+06	2.13876e+06	1.62766e+06	2.14779e+06	3.56836e+06	2.92722e+06	2.24874e+06	2.93546e+06	2.85442e+06	3.28801e+06	2.90789e+06	3.01632e+06	2.90996e+06	2.80765e+06
PC(41:5)	PC	M+H	850.632	14.7058	C49 H89 O8 N1 P1	4.25088e+07	5.52614e+07	4.35875e+07	4.38495e+07	3.5944e+07	4.56105e+07	4.66165e+07	3.82541e+07	4.80597e+07	4.37153e+07	4.16268e+07	4.18899e+07	4.44413e+07	3.95164e+07	4.06012e+07	4.31952e+07	4.31458e+07
PC(41:6)	PC	M+H	848.616	14.3127	C49 H87 O8 N1 P1	2.60034e+08	2.82429e+08	2.31649e+08	2.68498e+08	2.04378e+08	2.22727e+08	2.67487e+08	2.68337e+08	2.47876e+08	2.21565e+08	2.31614e+08	2.27299e+08	2.317e+08	2.47534e+08	2.479e+08	2.30721e+08	2.30066e+08
PC(41:7)	PC	M+H	846.601	13.0088	C49 H85 O8 N1 P1	9.42263e+06	1.15433e+07	6.90878e+06	4.19863e+06	6.41773e+06	1.92175e+06	3.83427e+06	6.62553e+06	1.37914e+06	6.77194e+06	15.866	4.42053e+06	1.26557e+07	1.09737e+07	6.33518e+06	5.47966e+06	5.74566e+06
PC(20:4_22:6)	PC	M+Na	876.551	10.8405	C50 H80 O8 N1 P1 Na1	1.44686e+08	1.84578e+08	1.59358e+08	1.41333e+08	1.48302e+08	1.85508e+08	1.75638e+08	1.69073e+08	1.37436e+08	1.74574e+08	1.59214e+08	1.6431e+08	1.59045e+08	1.58424e+08	1.60512e+08	1.61185e+08	1.60525e+08
PC(42:10)	PC	M+H	854.569	10.8405	C50 H81 O8 N1 P1	1.84325e+09	2.49453e+09	2.02267e+09	1.87018e+09	1.59289e+09	3.12144e+09	2.79407e+09	2.47447e+09	2.3398e+09	2.23974e+09	2.17758e+09	2.25232e+09	2.15574e+09	2.14749e+09	2.10336e+09	2.16631e+09	2.19499e+09
PC(42:11)	PC	M+H	852.554	11.7855	C50 H79 O8 N1 P1	5.5003e+07	4.91981e+07	4.03395e+07	3.30315e+07	4.21316e+07	3.46251e+07	4.00009e+07	4.65095e+07	4.1274e+07	4.72168e+07	6.37064e+07	6.74878e+07	6.6011e+07	6.40604e+07	6.37798e+07	6.58907e+07	6.94999e+07
PC(42:1e)	PC	M+H	858.731	18.91	C50 H101 O7 N1 P1	3.87523e+06	1.93706e+07	1.17572e+07	1.24742e+07	8.64376e+06	2.13789e+07	3.70142e+07	3.21695e+07	2.51439e+07	1.58622e+07	1.40138e+07	1.08769e+07	1.09162e+07	1.96732e+07	1.93051e+07	1.88807e+07	1.75684e+07
PC(42:2e)	PC	M+H	856.715	18.1009	C50 H99 O7 N1 P1	9.80674e+06	9.45704e+06	9.19192e+06	1.01049e+07	6.32129e+06	1.38902e+07	2.42177e+07	1.1842e+07	1.86086e+07	1.42989e+07	1.02711e+07	9.14269e+06	9.45864e+06	1.08734e+07	1.02275e+07	1.06693e+07	1.11728e+07
PC(42:3)	PC	M+H	868.679	17.079	C50 H95 O8 N1 P1	3.43126e+07	3.81368e+07	2.52419e+07	3.33744e+07	1.95979e+07	2.44981e+07	1.84058e+07	3.23069e+07	3.18971e+07	1.65532e+07	2.62081e+07	2.6135e+07	2.58337e+07	2.54479e+07	2.87511e+07	2.41525e+07	2.54491e+07
PC(42:3e)	PC	M+H	854.7	18.5092	C50 H97 O7 N1 P1	9.85452e+07	9.70286e+07	7.39582e+07	8.24726e+07	8.69376e+07	1.11086e+08	1.16962e+08	1.0774e+08	8.63223e+07	1.05153e+08	9.75015e+07	1.01778e+08	1.04406e+08	1.06143e+08	1.09632e+08	1.06001e+08	1.0849e+08
PC(42:4)	PC	M+Na	888.645	16.0131	C50 H92 O8 N1 P1 Na1	9.90522e+06	1.03743e+07	8.55262e+06	1.34335e+07	5.98266e+06	1.18082e+07	1.60871e+07	1.27872e+07	1.07748e+07	8.40139e+06	1.0808e+07	1.04944e+07	9.95565e+06	1.02166e+07	1.00062e+07	1.05286e+07	1.03671e+07
PC(42:4e)	PC	M+H	852.684	17.284	C50 H95 O7 N1 P1	2.27262e+07	2.66457e+07	2.04789e+07	3.05909e+07	1.67541e+07	3.32863e+07	3.69717e+07	3.6045e+07	3.58617e+07	2.96324e+07	2.99433e+07	2.79992e+07	2.59332e+07	2.69627e+07	2.62989e+07	2.54958e+07	2.74553e+07
PC(42:5)	PC	M+H	864.648	15.8727	C50 H91 O8 N1 P1	6.16309e+07	6.4419e+07	4.72169e+07	5.75509e+07	4.08393e+07	3.51771e+07	3.86509e+07	7.17412e+07	6.08805e+07	3.8881e+07	4.89969e+07	5.06519e+07	4.63985e+07	5.24924e+07	4.94444e+07	4.8275e+07	3.95812e+07
PC(42:5e)	PC	M+H	850.668	16.0879	C50 H93 O7 N1 P1	3.64966e+07	5.08874e+07	4.07605e+07	4.96488e+07	3.11308e+07	6.17098e+07	9.32171e+07	5.86057e+07	6.27195e+07	4.78408e+07	4.86399e+07	4.73699e+07	4.65717e+07	4.48931e+07	4.41604e+07	4.85009e+07	4.64185e+07
PC(42:6)	PC	M+H	862.632	14.9879	C50 H89 O8 N1 P1	1.65061e+09	1688160729	1.27651e+09	1.32695e+09	1.06989e+09	1.0953e+09	8.70052e+08	1.39553e+09	1.58348e+09	9.719e+08	1.32316e+09	1.29042e+09	1.30905e+09	1.29786e+09	1.23319e+09	1.25206e+09	1.25706e+09
PC(42:6e)	PC	M+H	848.653	14.9667	C50 H91 O7 N1 P1	2.20676e+07	3.33321e+07	3.26822e+07	2.72061e+07	2.2396e+07	2.67284e+07	4.73948e+07	3.29566e+07	2.78585e+07	2.778e+07	2.86255e+07	2.77101e+07	2.72832e+07	2.77287e+07	2.73174e+07	2.83183e+07	2.93542e+07
PC(42:7)	PC	M+H	860.616	13.6278	C50 H87 O8 N1 P1	6.5616e+08	9.04885e+08	7.76783e+08	7.87533e+08	5.80983e+08	5.9685e+08	5.46394e+08	8.78006e+08	6.50131e+08	5.4785e+08	6.84311e+08	6.65413e+08	6.22534e+08	6.34636e+08	6.34269e+08	6.32288e+08	6.42343e+08
PC(42:7e)	PC	M+H	846.637	15.5394	C50 H89 O7 N1 P1	6.25478e+07	6.70523e+07	5.24955e+07	7.6128e+07	5.39723e+07	8.50956e+07	1.20831e+08	1.05493e+08	8.11283e+07	7.15587e+07	7.39067e+07	7.0597e+07	7.03449e+07	6.75436e+07	6.63147e+07	6.79049e+07	6.48654e+07
PC(20:3_22:5)	PC	M+H	858.601	12.0324	C50 H85 O8 N1 P1	9.7982e+07	1.36543e+08	1.04772e+08	1.27117e+08	7.66689e+07	1.15866e+08	1.18667e+08	1.50475e+08	1.0632e+08	8.81041e+07	1.07775e+08	1.18904e+08	1.10239e+08	1.0662e+08	1.04955e+08	1.02186e+08	1.12793e+08
PC(20:2_22:6)	PC	M+Na	880.583	12.4895	C50 H84 O8 N1 P1 Na1	5.83209e+07	6.59221e+07	5.9268e+07	6.1971e+07	4.80424e+07	5.11085e+07	5.28031e+07	6.63293e+07	4.03249e+07	4.53282e+07	5.70033e+07	5.59356e+07	5.55617e+07	5.40763e+07	5.46256e+07	5.53737e+07	5.38447e+07
PC(42:8)	PC	M+H	858.601	12.4895	C50 H85 O8 N1 P1	7.82013e+08	955020556	7.63668e+08	8.98673e+08	5.7356e+08	7.56786e+08	8.78486e+08	1.08852e+09	7.0903e+08	5.93531e+08	7.80619e+08	7.66658e+08	7.47688e+08	7.60165e+08	7.49468e+08	7.64943e+08	7.70764e+08
PC(42:8e)	PC	M+H	844.621	15.979	C50 H87 O7 N1 P1	3.08734e+06	2.70366e+06	2.68601e+06	3.11238e+06	2.04826e+06	4.7051e+06	6.24242e+06	6.70614e+06	4.4516e+06	3.96123e+06	4.05359e+06	4.27005e+06	3.72449e+06	3.53125e+06	3.3948e+06	4.13518e+06	3.81516e+06
PC(42:9e)	PC	M+H	842.606	13.565	C50 H85 O7 N1 P1	1.30327e+06	2.06958e+06	4.4165e+06	1.12746e+06	2.56477e+06	2.37185e+06	3.2158e+06	1.10985e+06	1.90239e+06	3.31882e+06	3.1331e+06	2.56949e+06	2.26226e+06	2.34095e+06	4.06204e+06	3.06355e+06	3.5765e+06
PC(25:0_18:2)	PC	M+H	884.71	17.9109	C51 H99 O8 N1 P1	7.72148e+06	9.96637e+06	1.81161e+07	1.00559e+07	9.89393e+06	1.65601e+07	1.50455e+07	8.83487e+06	1.82952e+07	6.91518e+06	1.26265e+07	1.23329e+07	1.11043e+07	1.15761e+07	1.35731e+07	7.17058e+06	1.34456e+07
PC(43:2e)	PC	M+H	870.731	18.7467	C51 H101 O7 N1 P1	1.2822e+06	4.83089e+06	1.05218e+08	9.61731e+06	7.906e+07	1.72882e+07	1.37827e+07	2.58836e+06	1.33269e+07	9.15055e+06	3.24439e+06	6.79135e+06	1.42713e+07	1.68849e+07	7.83628e+07	1.30958e+07	1.79263e+07
PC(43:4)	PC	M+H	880.679	17.1434	C51 H95 O8 N1 P1	1.99597e+07	2.54473e+07	1.9755e+07	2.48544e+07	1.3393e+07	2.1965e+07	2.85657e+07	2.46332e+07	2.6793e+07	1.78872e+07	2.1048e+07	2.10421e+07	2.1042e+07	2.07654e+07	2.02721e+07	1.9702e+07	2.15086e+07
PC(43:4e)	PC	M+H	866.7	19.162	C51 H97 O7 N1 P1	1.88277e+08	1.85469e+08	2.82375e+08	2.56716e+08	2.93883e+08	8.41825e+08	2.26633e+09	2.05458e+08	2.04104e+09	1.02401e+09	5.03979e+08	9.06609e+08	6.08178e+08	8.71148e+08	8.41199e+08	4.80125e+08	7.76907e+08
PC(43:5)	PC	M+H	878.663	15.9257	C51 H93 O8 N1 P1	5.55682e+06	7.76009e+06	8.44686e+06	7.7521e+06	5.79273e+06	8.05725e+06	1.03055e+07	1.0351e+07	9.14898e+06	7.53253e+06	9.10352e+06	7.72686e+06	6.52867e+06	7.6198e+06	1.1278e+07	8.03595e+06	6.32354e+06
PC(43:6)	PC	M+H	876.648	15.5978	C51 H91 O8 N1 P1	1.44326e+07	1.76593e+07	1.25487e+07	1.41138e+07	9.27867e+06	9.19887e+06	1.14134e+07	1.39238e+07	1.43569e+07	9.95078e+06	1.17463e+07	1.24127e+07	1.1774e+07	1.14903e+07	1.29047e+07	1.34791e+07	1.08023e+07
PC(44:1)	PC	M+H	900.742	19.089	C52 H103 O8 N1 P1	4.01545e+06	5.3276e+06	5.33266e+06	9.32944e+06	1.98832e+06	2.6134e+06	4.20206e+06	5.79259e+06	5.94005e+06	2.46684e+06	1.80262e+06	5.15226e+06	3.12882e+06	4.30411e+06	3.63327e+06	3.55549e+06	1.5786e+06
PC(44:10)	PC	M+H	882.601	11.7672	C52 H85 O8 N1 P1	2.59877e+07	3.38601e+07	2.7547e+07	2.74346e+07	2.08756e+07	2.74446e+07	3.20752e+07	3.5247e+07	2.34729e+07	2.08214e+07	2.64605e+07	2.88066e+07	2.65225e+07	2.21058e+07	2.34896e+07	2.59465e+07	2.28981e+07
PC(22:5_22:6)	PC	M+Na	902.567	10.9155	C52 H82 O8 N1 P1 Na1	5.52676e+06	4.35649e+06	4.66292e+06	3.06667e+06	4.39978e+06	4.96955e+06	7.16507e+06	2.31419e+06	3.26856e+06	4.89599e+06	5.05667e+06	5.52882e+06	3.81083e+06	4.32508e+06	5.53844e+06	4.33574e+06	6.6603e+06
PC(44:11)	PC	M+H	880.585	10.9155	C52 H83 O8 N1 P1	3.95307e+07	5.36844e+07	4.25019e+07	4.65122e+07	4.31087e+07	8.8924e+07	9.58326e+07	6.36047e+07	7.13618e+07	5.94297e+07	5.37414e+07	5.23255e+07	5.67083e+07	5.03121e+07	5.53912e+07	5.56139e+07	5.31151e+07
PC(44:12)	PC	M+H	878.569	10.4386	C52 H81 O8 N1 P1	2.0408e+08	3.08864e+08	2.13673e+08	2.3355e+08	2.70265e+08	5.47416e+08	5.37666e+08	3.34459e+08	2.93238e+08	3.13043e+08	3.09139e+08	3.02895e+08	3.06898e+08	3.11415e+08	2.97043e+08	3.0031e+08	3.04548e+08
PC(44:2e)	PC	M+H	884.747	19.0965	C52 H103 O7 N1 P1	6.51861e+06	7.98579e+06	4.82732e+06	3.60077e+06	3.29951e+06	2.98989e+07	2.46786e+07	2.66559e+06	2.81597e+07	2.5267e+06	1.22026e+07	1.45053e+07	1.48656e+07	1.59612e+07	804172	2.15437e+06	4.18556e+06
PC(44:3)	PC	M+H	896.71	17.9839	C52 H99 O8 N1 P1	1.69752e+07	1.70603e+07	1.60829e+07	2.23466e+07	1.43818e+07	2.25435e+07	2.41645e+07	2.10428e+07	1.88937e+07	1.07057e+07	1.47018e+07	1.44058e+07	1.29401e+07	1.99058e+07	1.24942e+07	1.995e+07	2.00578e+07
PC(44:3e)	PC	M+H	882.731	19.616	C52 H101 O7 N1 P1	4.73527e+07	5.38478e+07	8.28688e+07	4.23418e+07	6.97785e+07	1.62912e+08	1.39831e+08	4.68172e+07	1.49864e+08	1.19289e+08	8.75514e+07	9.50992e+07	9.20079e+07	9.14282e+07	1.05201e+08	1.01765e+08	9.53253e+07
PC(44:4)	PC	M+H	894.695	17.6144	C52 H97 O8 N1 P1	1.11434e+08	1.17311e+08	9.97095e+07	1.30771e+08	7.07431e+07	1.21013e+08	1.59679e+08	1.20337e+08	1.46105e+08	8.08766e+07	1.08233e+08	1.14665e+08	1.07452e+08	1.10762e+08	1.06194e+08	1.05983e+08	1.12857e+08
PC(44:4e)	PC	M+H	880.715	18.1588	C52 H99 O7 N1 P1	6.6802e+06	6.95847e+06	6.05805e+06	9.23627e+06	1.06476e+07	1.22837e+07	1.17564e+07	1.06198e+07	1.09314e+07	6.55666e+06	6.32673e+06	6.72688e+06	6.01262e+06	7.35526e+06	7.2115e+06	6.89327e+06	7.75602e+06
PC(44:5)	PC	M+H	892.679	16.5031	C52 H95 O8 N1 P1	1.07598e+08	1.28183e+08	1.05837e+08	1.42843e+08	7.33515e+07	8.49392e+07	1.28409e+08	1.29247e+08	1.16841e+08	6.73552e+07	1.02961e+08	1.06399e+08	1.00932e+08	1.02314e+08	1.00426e+08	9.85119e+07	1.02022e+08
PC(44:5e)	PC	M+H	878.7	17.1913	C52 H97 O7 N1 P1	1.6962e+07	1.59806e+07	1.167e+07	1.69103e+07	8.6629e+06	1.99821e+07	2.69257e+07	2.42264e+07	1.71805e+07	1.79868e+07	1.68292e+07	1.8215e+07	1.74539e+07	1.75825e+07	1.53722e+07	1.66863e+07	1.56044e+07
PC(44:6)	PC	M+H	890.663	16.2107	C52 H93 O8 N1 P1	1.06896e+08	1.07421e+08	6.98824e+07	8.51349e+07	5.48884e+07	5.46635e+07	6.23657e+07	8.3591e+07	8.20162e+07	4.34248e+07	7.62714e+07	7.54752e+07	7.12032e+07	7.45687e+07	6.7774e+07	6.97863e+07	7.33564e+07
PC(44:6e)	PC	M+H	876.684	16.1709	C52 H95 O7 N1 P1	1.93615e+07	2.6954e+07	1.96522e+07	2.10728e+07	1.36984e+07	2.11787e+07	3.9726e+07	2.75092e+07	1.91345e+07	1.75674e+07	2.13208e+07	2.35364e+07	2.10171e+07	1.92852e+07	2.11291e+07	2.0489e+07	2.07542e+07
PC(44:7)	PC	M+H	888.648	14.9199	C52 H91 O8 N1 P1	8.73357e+07	1.14368e+08	9.16152e+07	1.06785e+08	6.57174e+07	5.49036e+07	5.19259e+07	1.02374e+08	9.01688e+07	5.30267e+07	8.67987e+07	7.85983e+07	8.38995e+07	7.89737e+07	7.97407e+07	8.18758e+07	8.28472e+07
PC(44:8)	PC	M+H	886.632	13.7949	C52 H89 O8 N1 P1	1.94643e+07	2.51026e+07	1.82676e+07	2.56525e+07	1.22783e+07	1.00963e+07	1.53524e+07	1.9458e+07	1.36345e+07	9.45669e+06	1.66172e+07	1.71999e+07	1.49224e+07	1.46138e+07	1.36223e+07	1.61956e+07	1.66437e+07
PC(44:9)	PC	M+H	884.616	12.4872	C52 H87 O8 N1 P1	1.71245e+07	1.87073e+07	1.778e+07	2.10685e+07	1.20337e+07	1.8736e+07	2.42429e+07	2.23825e+07	1.62762e+07	1.54549e+07	1.82772e+07	1.63958e+07	1.67227e+07	1.75847e+07	1.70661e+07	1.7587e+07	2.0804e+07
PC(45:4)	PC	M+H	908.71	18.053	C53 H99 O8 N1 P1	6.87925e+06	4.64914e+06	4635421	5.71753e+06	3.52619e+06	6.99053e+06	1.06332e+07	7.90253e+06	8.39859e+06	5.14216e+06	5.33298e+06	4.50185e+06	4.91135e+06	4.9893e+06	4.92658e+06	4.21304e+06	5.38809e+06
PC(45:6)	PC	M+H	904.679	16.7759	C53 H95 O8 N1 P1	2.03051e+06	2.22881e+06	2.84041e+06	6.04515e+06	3.25516e+06	20129.6	4.30669e+06	4.85576e+06	1.91857e+06	1.15744e+06	2.99536e+06	3.27617e+06	1.88998e+06	3.03329e+06	2.4946e+06	2.13674e+06	2.17516e+06
PC(46:4)	PC	M+H	922.726	18.409	C54 H101 O8 N1 P1	5.65017e+06	5.51066e+06	6.18225e+06	7.61034e+06	4.57328e+06	8.7973e+06	1.34374e+07	7.25716e+06	1.26173e+07	5.1917e+06	7.16917e+06	6.48663e+06	7.4839e+06	6.48915e+06	6.4371e+06	6.45071e+06	7.03939e+06
PC(32:1_14:4)	PC	M+H	920.71	17.5261	C54 H99 O8 N1 P1	8.87316e+06	9.0867e+06	8.41975e+06	1.26691e+07	6.11918e+06	1.05736e+07	1.80813e+07	1.04117e+07	1.46765e+07	7.03977e+06	9.74365e+06	9.32037e+06	9.74427e+06	9.26505e+06	9.58886e+06	1.00234e+07	9.23257e+06
PC(46:6)	PC	M+H	918.695	17.2972	C54 H97 O8 N1 P1	4.03446e+07	3.66104e+07	2.99034e+07	4.7389e+07	2.64501e+07	3.18269e+07	5.02464e+07	4.52966e+07	3.70507e+07	2.14417e+07	4.31851e+07	4.56508e+07	4.23512e+07	3.51424e+07	3.47296e+07	3.48839e+07	3.43684e+07
PC(46:7)	PC	M+H	916.679	16.1131	C54 H95 O8 N1 P1	3.16852e+07	3.81817e+07	3.00657e+07	4.33133e+07	2.02377e+07	2.30399e+07	3.95063e+07	4.06584e+07	3.02927e+07	1.76077e+07	3.24225e+07	3.12415e+07	2.94706e+07	3.01755e+07	2.86272e+07	2.95518e+07	2.94972e+07
PC(46:8)	PC	M+H	914.663	15.0339	C54 H93 O8 N1 P1	7.44764e+06	7.20255e+06	6.95439e+06	9.63095e+06	4.81868e+06	5.18581e+06	1.18069e+07	7.56463e+06	3.53406e+06	3.31394e+06	5.20782e+06	8.45976e+06	7.0866e+06	7.61548e+06	5.5047e+06	5.25704e+06	5.89336e+06
PC(57:1)	PC	M+H	1082.95	21.628	C65 H129 O8 N1 P1	3.42075e+07	3.18328e+07	4.36763e+07	1.60035e+07	1.75201e+07	1.70278e+07	3.92111e+07	6.17444e+07	1.61263e+07	3.50178e+07	2.77806e+07	4.9442e+07	5.12127e+07	2.5477e+07	4.99985e+07	5.04481e+07	1.26076e+07
PC(57:2)	PC	M+H	1080.93	21.2504	C65 H127 O8 N1 P1	3.22042e+06	3.25423e+06	3.33638e+06	2.97857e+06	268058	1.27243e+06	968402	6.7741e+06	1.08219e+06	0	2.06804e+06	1.31962e+06	1.21051e+06	1.86417e+06	2.33712e+06	881684	1.21628e+06
PC(60:2)	PC	M+H	1122.98	22.3468	C68 H133 O8 N1 P1	1.42043e+07	1.8473e+07	1.38212e+07	1.23023e+07	1.07124e+07	1.85593e+07	2.05474e+07	1.6654e+07	1.55888e+07	1.58558e+07	1.65665e+07	1.50453e+07	1.26072e+07	1.46929e+07	1.28952e+07	1.53171e+07	1.46309e+07
PE(10:0)	PE	M+H	384.178	1.18679	C15 H31 O8 N1 P1	6.7046e+06	1.01636e+07	6.96151e+06	7.28135e+06	2.8378e+06	3.24116e+06	4.96668e+06	4.47985e+06	3.58865e+06	5.27029e+06	4.63902e+06	4.97214e+06	4.71076e+06	4.65295e+06	4.60102e+06	4.51165e+06	4.7406e+06
PE(14:1)	PE	M+H	438.225	1.734	C19 H37 O8 N1 P1	1.26541e+06	869328	815772	1.02426e+06	395320	708234	3.17654e+06	2.00231e+06	1.1597e+07	532598	1.12451e+06	1.52989e+06	901497	1.7421e+06	1.32319e+06	1.08608e+06	990688
PE(16:0e)	PE	M+Na	476.275	3.50379	C21 H44 O7 N1 P1 Na1	8.57686e+07	8.83368e+07	7.21709e+07	9.99782e+07	1.10512e+08	1.78361e+08	1.44167e+08	1.21493e+08	1.37953e+08	1.2815e+08	1.13145e+08	1.11518e+08	1.14869e+08	1.10767e+08	1.09442e+08	1.20064e+08	1.10046e+08
PE(16:1)	PE	M+H	466.256	9.547	C21 H41 O8 N1 P1	1.19146e+06	913521	1.54761e+06	1.01077e+06	1.30286e+06	5.38259e+07	1.41628e+06	801556	2.59339e+06	5.18474e+07	872717	1.12105e+06	1.00171e+06	911786	974354	1.5568e+06	1.24748e+06
PE(16:1e)	PE	M+H	452.277	2.43659	C21 H43 O7 N1 P1	3.39567e+07	4.69903e+07	3.9906e+07	6.01919e+07	6.75745e+07	1.53415e+08	8.41766e+07	9.67319e+07	1.41008e+08	6.27986e+07	7.2665e+07	7.53647e+07	7.5281e+07	7.36471e+07	8.00048e+07	6.9481e+07	7.58849e+07
PE(17:0e)	PE	M+H	468.308	4.32016	C22 H47 O7 N1 P1	3.5108e+07	3.26522e+07	2.43441e+07	4.07419e+07	4.92828e+07	1.02785e+08	8.32757e+07	5.43012e+07	7.23254e+07	4.96738e+07	4.86926e+07	4.95013e+07	4.97992e+07	4.81475e+07	4.72175e+07	4.80607e+07	4.89913e+07
PE(17:1e)	PE	M+H	466.293	3.03662	C22 H45 O7 N1 P1	4.47341e+06	5.17238e+06	4.19135e+06	7.8213e+06	7.81482e+06	1.30908e+07	5.97867e+06	9.14362e+06	1.11048e+07	5.00793e+06	7.19386e+06	6.92494e+06	7.30231e+06	7.05761e+06	7.21611e+06	7.33267e+06	7.69712e+06
PE(18:0e)	PE	M+Na	504.306	3.126	C23 H48 O7 N1 P1 Na1	1.42817e+07	1.55164e+07	1.308e+07	2.16996e+07	2.26524e+07	4.84009e+07	3.04216e+07	3.11544e+07	3.00696e+07	2.03513e+07	2.31539e+07	2.36074e+07	2.39338e+07	2.38792e+07	2.29085e+07	2.31583e+07	2.45742e+07
PE(12:1e_6:0)	PE	M+Na	502.29	2.607	C23 H46 O7 N1 P1 Na1	2.35787e+08	1.23512e+09	9.36912e+08	4.7072e+08	1.13073e+09	1.20788e+09	1.93944e+09	1.63958e+09	1.93211e+09	1.24542e+09	4.98564e+08	5.11014e+08	5.15688e+08	5.32942e+08	5.42244e+08	5.52029e+08	5.3902e+08
PE(18:1e)	PE	M+H	480.308	3.73463	C23 H47 O7 N1 P1	4.68912e+08	5.39042e+08	4.54232e+08	7.24966e+08	7.73395e+08	1.66883e+09	1.03334e+09	1.155e+09	1.17983e+09	7.54238e+08	8.24471e+08	8.26886e+08	8.21341e+08	8.05576e+08	7.78479e+08	8.24456e+08	8.11961e+08
PE(18:2e)	PE	M+H	478.293	2.55328	C23 H45 O7 N1 P1	2.52965e+08	2.65604e+08	1.85497e+08	2.66293e+08	2.47967e+08	5.61935e+08	4.78646e+08	4.10607e+08	4.89568e+08	2.56375e+08	3.39202e+08	3.19881e+08	3.07638e+08	3.07055e+08	3.01558e+08	3.08057e+08	3.08603e+08
PE(18:3e)	PE	M+H	476.277	2.12767	C23 H43 O7 N1 P1	9.9355e+06	1.11312e+07	9.71892e+06	1.31488e+07	1.54541e+07	3.52003e+07	2.06814e+07	1.83061e+07	2.37907e+07	1.01049e+07	1.83338e+07	1.72222e+07	1.69299e+07	1.44033e+07	1.49693e+07	1.79686e+07	1.57903e+07
PE(19:0e)	PE	M+H	496.34	3.32264	C24 H51 O7 N1 P1	2.12367e+10	2.09277e+10	1.90822e+10	2.63596e+10	2.68233e+10	4.30465e+10	3.74483e+10	3.15006e+10	3.521e+10	2.99887e+10	2.7233e+10	2.88655e+10	2.73802e+10	2.68539e+10	2.6946e+10	2.66751e+10	2.73962e+10
PE(19:1e)	PE	M+H	494.324	2.351	C24 H49 O7 N1 P1	7.44599e+08	9.31948e+08	8.5178e+08	1.37038e+09	1.22979e+09	1.66469e+09	1.22714e+09	1.45425e+09	1.60337e+09	9.2594e+08	1.09504e+09	1.18834e+09	1.18977e+09	1.15337e+09	1.18351e+09	1.16066e+09	1.19811e+09
PE(19:2e)	PE	M+H	492.308	2.957	C24 H47 O7 N1 P1	1.40131e+06	1.69815e+06	921297	800200	961636	2.64035e+06	1.58402e+06	1.36175e+06	1.4388e+06	769331	1.44047e+06	930287	1.18674e+06	929164	1.24556e+06	1.19691e+06	957671
PE(20:0e)	PE	M+H	510.355	7.43483	C25 H53 O7 N1 P1	2.6131e+07	2.26427e+07	1.55912e+07	2.26943e+07	2.95641e+07	4.12616e+07	2.481e+07	3.06568e+07	4.74212e+07	2.31278e+07	3.11867e+07	2.89464e+07	2.82142e+07	2.78869e+07	2.73501e+07	3.03373e+07	2.73409e+07
PE(20:1e)	PE	M+H	508.34	5.48423	C25 H51 O7 N1 P1	3.44562e+07	3.73831e+07	2.89784e+07	5.17261e+07	6.24605e+07	1.42823e+08	7.70052e+07	7.78084e+07	9.38179e+07	6.08304e+07	6.04021e+07	5.98659e+07	5.97459e+07	6.01926e+07	5.74169e+07	6.30112e+07	5.98007e+07
PE(20:2e)	PE	M+H	506.324	4.04635	C25 H49 O7 N1 P1	7.67478e+06	8.96005e+06	7.1913e+06	1.19829e+07	1.26076e+07	2.06392e+07	1.5319e+07	1.84598e+07	1.25864e+07	9.5345e+06	1.13768e+07	1.21467e+07	1.19793e+07	1.11139e+07	1.13845e+07	1.20907e+07	1.16335e+07
PE(20:3e)	PE	M+Na	526.29	2.29395	C25 H46 O7 N1 P1 Na1	9.23256e+08	8.86373e+08	7.82309e+08	1.05663e+09	1.21398e+09	2.80758e+09	2.39907e+09	1.46885e+09	1.79383e+09	1.29118e+09	1.33872e+09	1.38351e+09	1.34251e+09	1.31542e+09	1.35415e+09	1.37773e+09	1.38506e+09
PE(20:4e)	PE	M+H	502.293	13.7749	C25 H45 O7 N1 P1	4.53573e+06	7.76998e+06	7.54314e+06	8.76269e+06	4.06366e+06	8.96077e+06	1.02545e+07	7.57106e+06	4.24978e+06	4.30291e+06	5.77516e+06	4.31243e+06	5.90076e+06	5.94873e+06	5.86087e+06	6.23313e+06	6.27616e+06
PE(20:5e)	PE	M+H	500.277	1.94901	C25 H43 O7 N1 P1	1.83175e+07	2.03288e+07	1.60408e+07	2.40773e+07	2.35032e+07	6.88237e+07	4.15497e+07	4.06137e+07	5.26721e+07	2.45102e+07	3.15138e+07	3.14157e+07	3.19166e+07	3.0386e+07	3.09075e+07	3.07734e+07	3.14878e+07
PE(21:2e)	PE	M+H	520.34	26.996	C26 H51 O7 N1 P1	1671.46	4212.09	75915.4	0.004	5495.24	22955.9	9050.98	0.003	2924.4	2468.55	6383.64	5526.21	8352.76	9404.7	8234.24	3874.71	4652.24
PE(22:0e)	PE	M+H	538.387	9.108	C27 H57 O7 N1 P1	1.39243e+06	813317	763606	1.06646e+06	1.35393e+06	1.69772e+06	1.09866e+06	1.20864e+06	2.26127e+06	835982	1.27767e+06	1.38011e+06	1.257e+06	1.24854e+06	1.33529e+06	1.07773e+06	1.25355e+06
PE(22:1e)	PE	M+H	536.371	7.49511	C27 H55 O7 N1 P1	1.64985e+06	1.81115e+06	1.08187e+06	2.31303e+06	2.78078e+06	4.51406e+06	2.12078e+06	3.38337e+06	4.05519e+06	2.27906e+06	2.71366e+06	2.6842e+06	2.41995e+06	2.30699e+06	2.35942e+06	2.65245e+06	2.5846e+06
PE(22:3e)	PE	M+Na	554.322	2.27044	C27 H50 O7 N1 P1 Na1	6.63238e+06	7.21394e+06	1.40679e+06	3.94039e+06	9.11407e+06	1.03185e+07	1.19044e+07	6.53449e+06	1.40279e+07	6.56602e+06	8.91367e+06	3.8639e+06	1.80209e+06	5.63695e+06	7.63765e+06	6.54532e+06	7.2235e+06
PE(8:1e_14:2)	PE	M+H	532.34	4.4938	C27 H51 O7 N1 P1	697995	1.04404e+06	1.03148e+06	1.37017e+06	874649	1.80464e+06	1.38466e+06	1.42097e+06	2.03042e+06	927873	1.10864e+06	909701	1.06683e+06	1.01686e+06	1.06698e+06	1.10399e+06	1.08727e+06
PE(22:4e)	PE	M+H	530.324	3.36141	C27 H49 O7 N1 P1	3.05116e+07	3.96117e+07	4.19527e+07	4.30945e+07	2.60619e+07	3.3375e+07	4.49124e+07	3.865e+07	3.05679e+07	2.50715e+07	3.13544e+07	3.26906e+07	3.14454e+07	2.90832e+07	3.38535e+07	2.73416e+07	3.01229e+07
PE(22:5e)	PE	M+H	528.308	2.58216	C27 H47 O7 N1 P1	2.32684e+07	4.23755e+07	2.44154e+07	2.82351e+07	2.23411e+07	4.79187e+07	4.81533e+07	3.64612e+07	4.88905e+07	2.79303e+07	2.99434e+07	3.06804e+07	2.89814e+07	2.88259e+07	2.83351e+07	2.87296e+07	2.84699e+07
PE(24:4e)	PE	M+H	558.355	4.69827	C29 H53 O7 N1 P1	1.3924e+06	2.21784e+06	1.9811e+06	2.92888e+06	1.44491e+06	3.60659e+06	5.06497e+06	3.2153e+06	2.34442e+06	1.56413e+06	2.02048e+06	1.89273e+06	1.93436e+06	2.28141e+06	2.33027e+06	1.85189e+06	2.42259e+06
PE(24:5e)	PE	M+H	556.34	3.9	C29 H51 O7 N1 P1	791820	848960	884036	1.5429e+06	792608	1.53592e+06	1.3511e+06	1.33229e+06	1.08319e+06	576425	974514	993499	955585	958708	943797	1.05718e+06	885805
PE(30:0e)	PE	M+H	650.512	12.7637	C35 H73 O7 N1 P1	0	4.94042e+06	4.49953e+06	4.13405e+06	1.11817e+06	7.7201e+06	4.12178e+06	4.75808e+06	5.29169e+06	3.9226e+06	2.34696e+06	6.69018e+06	4.61471e+06	1.22995e+06	1.66654e+06	3.60582e+06	5.8215e+06
PE(31:3)	PE	M+H	672.46	8.77	C36 H67 O8 N1 P1	5.84965e+06	1.41081e+07	4.95253e+06	5.12648e+06	2.46404e+06	6.96712e+06	7.80943e+06	4.53496e+06	1.04519e+07	6.76265e+06	5.41683e+06	5.01977e+06	4.97681e+06	5.31899e+06	5.27252e+06	5.37484e+06	5.29165e+06
PE(16:0_16:0)	PE	M+Na	714.504	12.6584	C37 H74 O8 N1 P1 Na1	2.75778e+08	2.54321e+08	1.83329e+08	1.9521e+08	1.2253e+08	2.47326e+08	2.3515e+08	1.86543e+08	3.14342e+08	1.44849e+08	2.04953e+08	2.08384e+08	1.96403e+08	1.96148e+08	2.01095e+08	2.12302e+08	2.22872e+08
PE(16:0p_16:0)	PE	M+H	676.528	15.1355	C37 H75 O7 N1 P1	7.88497e+06	9.67436e+06	7.88513e+06	1.28861e+07	9.03075e+06	1.3406e+07	2.49999e+07	1.46078e+07	1.23411e+07	1.26705e+07	1.06519e+07	1.10811e+07	9.73314e+06	1.1501e+07	1.10942e+07	1.09581e+07	1.07122e+07
PE(16:0_16:1)	PE	M+H	690.507	13.1298	C37 H73 O8 N1 P1	9.4265e+07	1.0742e+08	1.0907e+08	1.32324e+08	8.48318e+07	1.25625e+08	9.71622e+07	1.23595e+08	1.31366e+08	1.10512e+08	1.13016e+08	1.1278e+08	1.07536e+08	1.08612e+08	1.12381e+08	1.074e+08	1.08146e+08
PE(32:1e)	PE	M+H	676.528	15.1283	C37 H75 O7 N1 P1	8.57577e+06	1.09422e+07	1.11829e+07	1.45006e+07	1.0018e+07	1.44306e+07	2.59754e+07	1.59067e+07	1.28529e+07	1.26569e+07	1.32585e+07	1.29409e+07	1.16067e+07	1.15505e+07	1.17343e+07	1.17305e+07	1.20485e+07
PE(16:0p_16:1)	PE	M+H	674.512	13.825	C37 H73 O7 N1 P1	1.21277e+06	1.90945e+06	5.29096e+06	6.2907e+06	1.06926e+06	2.73319e+06	1.21927e+06	4.62217e+06	3.39103e+06	1.46877e+06	2.6247e+06	2.07969e+06	1.61981e+06	2.13184e+06	3.28654e+06	1.80291e+06	1.74497e+06
PE(16:1_16:1)	PE	M+H	688.491	11.6954	C37 H71 O8 N1 P1	3.71867e+06	1.58561e+07	1.53261e+07	4.82618e+07	6.52159e+06	1.67775e+07	1.21587e+07	1.99265e+07	6.10953e+07	9.24755e+06	1.18898e+07	1.16188e+07	1.51006e+07	1.76125e+07	1.272e+07	9.90553e+06	1.07932e+07
PE(33:0)	PE	M+H	706.538	13.0824	C38 H77 O8 N1 P1	3.07618e+07	3.05252e+07	2.89306e+07	3.10106e+07	4.49954e+07	5.31424e+07	3.72863e+07	3.62531e+07	3.68456e+07	5.09759e+07	4.1383e+07	4.13657e+07	4.25117e+07	3.64038e+07	3.71469e+07	3.99356e+07	4.32798e+07
PE(15:0_18:1)	PE	M+Na	726.504	12.361	C38 H74 O8 N1 P1 Na1	3.00056e+07	3.76665e+07	2.91901e+07	4.05808e+07	2.05808e+07	3.91745e+07	3.34067e+07	3.38722e+07	4.22379e+07	2.8636e+07	3.09504e+07	3.09405e+07	2.70022e+07	3.38439e+07	3.04405e+07	2.96634e+07	2.95964e+07
PE(18:0_16:0)	PE	M+Na	742.536	13.4544	C39 H78 O8 N1 P1 Na1	4.45074e+09	5.05934e+09	4.27521e+09	4.63637e+09	3.38365e+09	5.06145e+09	4.73225e+09	5.78975e+09	4.56954e+09	3.74207e+09	4.42429e+09	4.28372e+09	4.3192e+09	4.39819e+09	4.32456e+09	4.47195e+09	4.45867e+09
PE(34:0e)	PE	M+Na	728.556	15.385	C39 H80 O7 N1 P1 Na1	9.64597e+07	1.0758e+08	9.35487e+07	9.7945e+07	6.04693e+07	9.23577e+07	1.25511e+08	1.39253e+08	1.10333e+08	6.987e+07	9.86301e+07	9.60487e+07	9.45728e+07	8.79384e+07	9.47351e+07	9.44427e+07	9.66488e+07
PE(18:0p_16:0)	PE	M+H	704.559	16.402	C39 H79 O7 N1 P1	8.36068e+06	1.02813e+07	1.55131e+07	1.58853e+07	8.06321e+06	1.2351e+07	2.57225e+07	1.84085e+07	1.21363e+07	8.98813e+06	1.33003e+07	1.15735e+07	1.0932e+07	1.13829e+07	1.20539e+07	1.13474e+07	1.16974e+07
PE(16:0_18:1)	PE	M+Na	740.52	13.1107	C39 H76 O8 N1 P1 Na1	8.36698e+09	8.58995e+09	7.68721e+09	7.85666e+09	7.08101e+09	9.60936e+09	8.74469e+09	8.54006e+09	8.82617e+09	8.37115e+09	8.29127e+09	8.20438e+09	8.14623e+09	7.98922e+09	8.02226e+09	8.09558e+09	8.08712e+09
PE(34:1)	PE	M+H	718.538	13.1107	C39 H77 O8 N1 P1	1.07306e+07	2.37732e+07	2.61618e+07	1.96923e+07	3.71459e+07	1.13011e+07	1.30528e+07	1.77881e+07	1.96999e+08	1.09966e+07	1.38574e+07	1.68674e+07	9.74955e+06	9.52793e+06	7.37279e+06	1.06313e+07	5.00162e+06
PE(34:1e)	PE	M+Na	726.541	13.9732	C39 H78 O7 N1 P1 Na1	4.09982e+07	4.6795e+07	4.83627e+07	4.44078e+07	3.93664e+07	5.32102e+07	4.61778e+07	4.97391e+07	5.75307e+07	4.5597e+07	4.17147e+07	4.88876e+07	4.65955e+07	4.39062e+07	4.35026e+07	4.46818e+07	4.66751e+07
PE(16:0p_18:1)	PE	M+H	702.543	15.1764	C39 H77 O7 N1 P1	1.15905e+08	1.21946e+08	1.95588e+08	2.51552e+08	1.20419e+08	2.01233e+08	2.17651e+08	1.9823e+08	1.90368e+08	1.08962e+08	1.50511e+08	1.56253e+08	1.4336e+08	1.54354e+08	1.49999e+08	1.38287e+08	1.52841e+08
PE(16:0_18:2)	PE	M+Na	738.504	11.1841	C39 H74 O8 N1 P1 Na1	2.42147e+08	2.4805e+08	1.67591e+08	1.44934e+08	1.05603e+08	2.27282e+08	2.06614e+08	2.06745e+08	2.26509e+08	1.12211e+08	1.81031e+08	1.8545e+08	1.74585e+08	1.77155e+08	1.71735e+08	1.8085e+08	1.77539e+08
PE(16:1_18:1)	PE	M+H	716.522	13.3821	C39 H75 O8 N1 P1	8.52566e+09	7.45431e+09	6.06145e+09	6.72109e+09	5.39934e+09	9.18411e+09	9.48728e+09	7.70288e+09	8.45692e+09	6.9592e+09	7.52063e+09	7.31207e+09	7.3989e+09	7.48364e+09	7.59106e+09	7.60929e+09	7.3757e+09
PE(34:2e)	PE	M+Na	724.525	13.7607	C39 H76 O7 N1 P1 Na1	1.41363e+09	1.59823e+09	1.67195e+09	1.96972e+09	1.19039e+09	1.92094e+09	2.43428e+09	1.92798e+09	1.731e+09	1.31076e+09	1.59824e+09	1.59516e+09	1.56697e+09	1.58904e+09	1.54409e+09	1.66385e+09	1.58826e+09
PE(16:0p_18:2)	PE	M+H	700.528	14.0382	C39 H75 O7 N1 P1	2.99477e+07	2.76255e+07	3.20168e+07	3.56295e+07	2.83665e+07	3.26886e+07	2.64143e+07	5.45286e+07	3.01976e+07	2.7676e+07	3.23392e+07	3.31108e+07	3.07651e+07	2.62718e+07	3.41466e+07	3.49844e+07	3.33418e+07
PE(14:0_20:3)	PE	M+Na	736.489	11.1416	C39 H72 O8 N1 P1 Na1	5.10209e+07	6.40708e+07	5.14377e+07	5.92829e+07	2.87093e+07	7.4965e+07	9.48332e+07	7.27707e+07	6.3198e+07	3.91554e+07	5.25081e+07	5.51957e+07	5.43436e+07	5.17892e+07	4.66713e+07	5.62672e+07	5.51114e+07
PE(34:3)	PE	M+Na	736.489	11.9933	C39 H72 O8 N1 P1 Na1	3.03068e+07	5.21677e+07	3.70205e+07	3.77404e+07	2.48453e+07	4.31665e+07	3.71367e+07	4.10312e+07	5.07549e+07	3.40602e+07	3.5255e+07	3.1898e+07	3.72307e+07	3.5879e+07	3.6623e+07	2.93907e+07	3.28828e+07
PE(16:0_18:3)	PE	M+H	714.507	12.3442	C39 H73 O8 N1 P1	1.83786e+08	1.82736e+08	1.12424e+08	1.63324e+08	9.26961e+07	2.21324e+08	2.3335e+08	2.07775e+08	2.65985e+08	1.29451e+08	1.68225e+08	1.71135e+08	1.80363e+08	1.66984e+08	1.81468e+08	1.73026e+08	1.78484e+08
PE(14:0_20:4)	PE	M+H	712.491	11.5703	C39 H71 O8 N1 P1	2.00542e+07	2.82827e+07	2.0729e+07	2.28125e+07	1.57182e+07	4.01241e+07	3.41932e+07	2.69004e+07	3.66338e+07	2.10036e+07	2.22207e+07	2.70953e+07	2.08452e+07	2.13941e+07	2.4181e+07	2.24257e+07	2.27386e+07
PE(35:0)	PE	M+Na	756.551	13.4044	C40 H80 O8 N1 P1 Na1	7.2506e+06	8.20825e+06	2.35795e+07	2.79775e+07	1.69585e+07	2.84234e+07	2.34197e+07	3.22797e+07	2.40452e+07	2.05584e+07	2.50642e+07	2.83984e+07	7.67714e+06	2.32459e+06	2.15958e+07	5.37868e+06	2.98243e+07
PE(18:0_17:0)	PE	M+Na	756.551	14.8465	C40 H80 O8 N1 P1 Na1	6.44034e+06	6.69934e+06	4.00361e+06	9.52091e+06	3.7695e+06	8.98618e+06	8.89014e+06	8.17153e+06	9.81311e+06	4.73498e+06	5.36668e+06	7.19107e+06	5.70971e+06	4.731e+06	7.60222e+06	5.65354e+06	6.68713e+06
PE(35:0e)	PE	M+Na	742.572	14.891	C40 H82 O7 N1 P1 Na1	1.07683e+08	1.12202e+08	1.16287e+08	1.27803e+08	9.42492e+07	1.01955e+08	1.43836e+08	1.29672e+08	1.03875e+08	1.08694e+08	1.17625e+08	1.06885e+08	1.09701e+08	1.07966e+08	1.1335e+08	1.05694e+08	1.15693e+08
PE(19:1_16:0)	PE	M+Na	754.536	13.0965	C40 H78 O8 N1 P1 Na1	5.34003e+06	6.35396e+06	8.19037e+06	6.07207e+06	6.62692e+06	6.33478e+06	4.21401e+06	8.40909e+06	1.03517e+07	6.79167e+06	4.86297e+06	6.58671e+06	2.15946e+06	2.50472e+06	7.30376e+06	5.62449e+06	2.57205e+06
PE(17:0_18:1)	PE	M+Na	754.536	13.7893	C40 H78 O8 N1 P1 Na1	8.36981e+08	9.17346e+08	6.95462e+08	7.98057e+08	5.85597e+08	1.02377e+09	1.03422e+09	8.46094e+08	9.3274e+08	6.96102e+08	7.89801e+08	8.10156e+08	7.34186e+08	7.81597e+08	7.65431e+08	7.77844e+08	7.64804e+08
PE(17:1_18:1)	PE	M+Na	752.52	12.4561	C40 H76 O8 N1 P1 Na1	1.43592e+08	1.93776e+08	1.5695e+08	1.87603e+08	1.17478e+08	1.76807e+08	1.30865e+08	1.78227e+08	2.0704e+08	1.39949e+08	1.60728e+08	1.6201e+08	1.63644e+08	1.61105e+08	1.63087e+08	1.63998e+08	1.70247e+08
PE(35:2)	PE	M+H	730.538	13.3318	C40 H77 O8 N1 P1	1.73503e+07	1.32325e+07	1.21648e+07	1.55713e+07	1.21853e+07	2.07175e+07	2.52312e+07	2.12638e+07	1.55163e+07	1.26437e+07	9.68012e+06	1.76082e+07	2.05978e+07	9.61203e+06	1.58164e+07	1.64948e+07	1.74768e+07
PE(35:2e)	PE	M+Na	738.541	14.3099	C40 H78 O7 N1 P1 Na1	1.726e+07	2.14906e+07	2.10095e+07	2.45477e+07	1.58072e+07	3.88201e+07	3.70829e+07	2.26392e+07	2.72768e+07	1.74162e+07	1.8937e+07	1.8637e+07	1.78091e+07	1.94797e+07	2.41087e+07	2.49387e+07	1.94421e+07
PE(15:0_20:3)	PE	M+Na	750.504	11.8988	C40 H74 O8 N1 P1 Na1	2.07765e+08	2.10239e+08	1.74131e+08	2.39053e+08	1.38321e+08	1.83705e+08	2.46212e+08	1.88789e+08	1.87554e+08	1.70096e+08	1.74158e+08	1.72437e+08	1.7431e+08	1.80847e+08	1.92162e+08	1.79604e+08	1.8155e+08
PE(35:4e)	PE	M+Na	734.51	12.5361	C40 H74 O7 N1 P1 Na1	1.13134e+07	9.11966e+06	5.90395e+06	1.12359e+07	7.16912e+06	1.27651e+07	1.14918e+07	1.18961e+07	1.3058e+07	1.10729e+07	1.3172e+07	1.20026e+07	8.14998e+06	9.659e+06	8.60826e+06	9.43506e+06	9.74533e+06
PE(36:0)	PE	M+Na	770.567	14.7003	C41 H82 O8 N1 P1 Na1	2.25167e+08	2.6908e+08	2.66503e+08	2.74388e+08	1.86944e+08	2.75091e+08	2.78256e+08	3.30372e+08	2.58528e+08	187899396	2.4619e+08	2.4059e+08	2.44019e+08	2.40331e+08	2.44306e+08	2.40406e+08	2.29558e+08
PE(18:0_18:0)	PE	M+Na	770.567	15.0476	C41 H82 O8 N1 P1 Na1	1.76517e+09	1.79717e+09	1.5233e+09	1.9425e+09	1.30645e+09	2.83305e+09	2.51977e+09	2.44725e+09	2.39308e+09	1.67295e+09	1.92507e+09	1.96118e+09	1.889e+09	1.9409e+09	1.83255e+09	1.8517e+09	1.88732e+09
PE(36:0e)	PE	M+Na	756.588	16.719	C41 H84 O7 N1 P1 Na1	1.77553e+07	2.00486e+07	1.50024e+07	1.7892e+07	9.58768e+06	2.44927e+07	2.49995e+07	3.33274e+07	1.97957e+07	1.5705e+07	1.84098e+07	1.8322e+07	1.85745e+07	2.06935e+07	2.06395e+07	1.80831e+07	2.17749e+07
PE(16:0_20:1)	PE	M+Na	768.551	11.732	C41 H80 O8 N1 P1 Na1	1.86593e+07	3.68096e+07	3.44789e+07	2.68995e+07	2.43586e+07	2.18818e+07	2.56637e+07	3.54566e+07	3.47237e+07	3.13391e+07	3.70153e+07	1.85393e+07	3.94257e+07	2.05856e+07	2.63995e+07	3.21427e+07	1.78521e+07
PE(36:1)	PE	M+H	746.569	14.5209	C41 H81 O8 N1 P1	2.98975e+08	2.59158e+08	2.54902e+08	2.94649e+08	2.39492e+08	2.71491e+08	3.56729e+08	3.77536e+08	1.87281e+08	3.10885e+08	2.95956e+08	2.94862e+08	3.18036e+08	3.73763e+08	2.77562e+08	3.41791e+08	3.49495e+08
PE(36:1e)	PE	M+Na	754.572	15.3174	C41 H82 O7 N1 P1 Na1	9.91937e+07	9.63756e+07	9.38437e+07	1.22688e+08	7.31255e+07	1.15277e+08	1.40117e+08	1.06182e+08	1.07585e+08	8.67644e+07	9.21519e+07	9.96215e+07	9.52049e+07	9.93917e+07	9.38388e+07	1.01745e+08	9.59919e+07
PE(16:0p_20:1)	PE	M+H	730.575	16.427	C41 H81 O7 N1 P1	7.74646e+07	9.06358e+07	1.14419e+08	1.63125e+08	6.90315e+07	1.27265e+08	1.3233e+08	1.33869e+08	1.22851e+08	7.53192e+07	1.04765e+08	1.05118e+08	9.87579e+07	9.70216e+07	9.9832e+07	9.83768e+07	9.70807e+07
PE(18:1_18:1)	PE	M+Na	766.536	13.1797	C41 H78 O8 N1 P1 Na1	6.76028e+09	7.91308e+09	7.31317e+09	7.06463e+09	5.91946e+09	8.06919e+09	7.44653e+09	7.78857e+09	7.38638e+09	6.78318e+09	7.36069e+09	7.03308e+09	7.26804e+09	7.02755e+09	7.26284e+09	7.11323e+09	7.46281e+09
PE(36:2)	PE	M+H	744.554	13.1797	C41 H79 O8 N1 P1	1.27746e+08	1.02543e+08	8.87622e+07	1.11457e+08	8.76055e+07	1.32373e+08	1.45009e+08	1.08653e+08	1.77039e+08	9.04202e+07	1.16499e+08	1.12141e+08	1.1031e+08	1.05902e+08	1.0427e+08	1.11625e+08	1.11404e+08
PE(18:2e_18:0)	PE	M+Na	752.556	14.7364	C41 H80 O7 N1 P1 Na1	3.84227e+08	4.31482e+08	4.93267e+08	6.05579e+08	3.48477e+08	4.4304e+08	6.65434e+08	5.07862e+08	4.3242e+08	3.84003e+08	4.31691e+08	4.3861e+08	4.37464e+08	4.31209e+08	4.35417e+08	4.40496e+08	4.36507e+08
PE(36:2e)	PE	M+Na	752.556	15.102	C41 H80 O7 N1 P1 Na1	8.5601e+08	9.17301e+08	9.92912e+08	1.18937e+09	6.64561e+08	1.28028e+09	1.51362e+09	1.13093e+09	1.14152e+09	7.81716e+08	9.72535e+08	1.00035e+09	9.42425e+08	9.81306e+08	9.62633e+08	9.02857e+08	9.22722e+08
PE(18:0e_18:2)	PE	M+H	730.575	15.5917	C41 H81 O7 N1 P1	8.06638e+07	9.20632e+07	6.39862e+07	5.83461e+07	3.91616e+07	8.5578e+07	1.50868e+08	5.9041e+07	9.4854e+07	7.68901e+07	7.23055e+07	7.63395e+07	7.03029e+07	7.1806e+07	6.92328e+07	6.75798e+07	6.80507e+07
PE(18:0p_18:2)	PE	M+H	728.559	15.232	C41 H79 O7 N1 P1	1.32747e+08	3.3003e+07	5.92856e+07	9.34446e+07	3.49369e+07	6.02045e+07	5.66734e+07	6.52779e+07	5.82334e+07	3.92585e+07	5.33814e+07	5.01758e+07	4.91874e+07	4.88902e+07	4.8219e+07	4.48564e+07	4.93724e+07
PE(18:0_18:3)	PE	M+H	742.538	10.5192	C41 H77 O8 N1 P1	5.6627e+06	7.28446e+06	4.07445e+06	5.05364e+06	2.19233e+06	4.45595e+06	4.79869e+06	4.30813e+06	6.94697e+06	5.04523e+06	4.20667e+06	4.67565e+06	4.56786e+06	4.15953e+06	4.43577e+06	4.14056e+06	4.31973e+06
PE(18:1_18:2)	PE	M+Na	764.52	12.6371	C41 H76 O8 N1 P1 Na1	1.18608e+10	1.1417e+10	1.08406e+10	1.06763e+10	1.0878e+10	1.2098e+10	1.27457e+10	1.1369e+10	1.0475e+10	1.10338e+10	1.17231e+10	1.15891e+10	1.15359e+10	1.14292e+10	1.14444e+10	1.16817e+10	1.16433e+10
PE(36:3)	PE	M+Na	764.52	13.7193	C41 H76 O8 N1 P1 Na1	7.93727e+07	7.83844e+07	5.69952e+07	7.63194e+07	6.43765e+07	7.19964e+07	4.54532e+07	9.78173e+07	8.21522e+07	7.0913e+07	7.22872e+07	5.0908e+07	7.14196e+07	6.04626e+07	1.128e+07	6.72924e+07	9.09044e+07
PE(36:3e)	PE	M+Na	750.541	13.786	C41 H78 O7 N1 P1 Na1	5.37626e+08	6.73149e+08	6.84688e+08	8.33062e+08	5.30969e+08	9.20553e+08	1.06381e+09	8.94377e+08	8.50434e+08	6.17952e+08	6.83227e+08	7.02638e+08	6.73035e+08	6.86451e+08	6.62871e+08	7.01102e+08	6.77522e+08
PE(18:1e_18:2)	PE	M+Na	750.541	14.251	C41 H78 O7 N1 P1 Na1	5.32576e+07	5.80106e+07	6.39601e+07	8.20268e+07	4.987e+07	7.91779e+07	1.12005e+08	7.99494e+07	6.90715e+07	5.13935e+07	6.85979e+07	6.89204e+07	6.46859e+07	6.51862e+07	5.84522e+07	5.73584e+07	6.04923e+07
PE(16:0p_20:3)	PE	M+H	726.543	14.8163	C41 H77 O7 N1 P1	8.29081e+06	8.85264e+06	1.20787e+07	1.16511e+07	6.13807e+06	2.3522e+07	1.2891e+07	1.62682e+07	2.02612e+07	1.2865e+07	1.12714e+07	1.25775e+07	1.19773e+07	1.02238e+07	9.5822e+06	1.05265e+07	1.11528e+07
PE(36:4)	PE	M+H	740.522	9.37058	C41 H75 O8 N1 P1	4.17222e+06	5.83316e+06	4.33543e+06	4.5829e+06	1.9316e+06	2.69523e+06	2.6619e+06	3.2949e+06	4.25025e+06	3.15576e+06	3.23012e+06	3.18875e+06	3.11811e+06	2.96928e+06	2.93587e+06	3.09809e+06	3.19394e+06
PE(18:2_18:2)	PE	M+H	740.522	12.2988	C41 H75 O8 N1 P1	6.18597e+08	9.16601e+08	6.89605e+08	6.87302e+08	4.62968e+08	7.37005e+08	7.24137e+08	8.62045e+08	7.73191e+08	5.43917e+08	7.10748e+08	7.17457e+08	6.72158e+08	6.87134e+08	6.63281e+08	6.65465e+08	6.71696e+08
PE(36:4e)	PE	M+H	726.543	13.9733	C41 H77 O7 N1 P1	4.09982e+07	4.6795e+07	4.83627e+07	4.44078e+07	3.93664e+07	5.32102e+07	4.61778e+07	4.97391e+07	5.75307e+07	4.5597e+07	4.17147e+07	4.88876e+07	4.65955e+07	4.39062e+07	4.35026e+07	4.46818e+07	4.66751e+07
PE(16:0p_20:4)	PE	M+H	724.528	13.7232	C41 H75 O7 N1 P1	1.41363e+09	1.59823e+09	1.67195e+09	1.96972e+09	1.19039e+09	1.92094e+09	2.43428e+09	1.92798e+09	1.731e+09	1.31076e+09	1.59824e+09	1.59516e+09	1.56697e+09	1.58904e+09	1.54409e+09	1.66385e+09	1.58826e+09
PE(36:5)	PE	M+H	738.507	10.1174	C41 H73 O8 N1 P1	6.58354e+06	7.30817e+06	5.38151e+06	7.12889e+06	3.25224e+06	7.09242e+06	5.67329e+06	7.02407e+06	8.75146e+06	4.60456e+06	6.31879e+06	6.20208e+06	5.57072e+06	5.20867e+06	5.20743e+06	5.4554e+06	5.9094e+06
PE(18:3_18:2)	PE	M+H	738.507	11.1911	C41 H73 O8 N1 P1	2.39312e+08	2.41804e+08	1.65065e+08	1.40267e+08	1.02574e+08	2.22746e+08	2.03755e+08	2.03562e+08	2.20714e+08	1.10203e+08	1.78966e+08	1.83211e+08	1.6976e+08	1.74132e+08	1.69578e+08	1.78587e+08	1.75952e+08
PE(16:1_20:4)	PE	M+H	738.507	11.705	C41 H73 O8 N1 P1	7.04753e+08	1.05606e+09	9.09885e+08	1.04894e+09	7.20208e+08	1.47483e+09	1.05617e+09	1.26408e+09	1.6798e+09	1.03199e+09	1.08476e+09	1.07107e+09	1.04415e+09	1.0326e+09	1.02511e+09	1.06113e+09	1.07532e+09
PE(36:5e)	PE	M+Na	746.51	13.7534	C41 H74 O7 N1 P1 Na1	3.42255e+07	3.79102e+07	4.41818e+07	4.95351e+07	4.14632e+07	4.11381e+07	5.27735e+07	4.29119e+07	3.64742e+07	2.8724e+07	5.42886e+07	4.08032e+07	4.07324e+07	4.37518e+07	3.6018e+07	4.34027e+07	4.0541e+07
PE(16:0p_20:5)	PE	M+H	722.512	12.804	C41 H73 O7 N1 P1	7.50275e+06	8.79177e+06	3.99037e+06	1.18435e+07	5.24755e+06	2.28619e+07	1.99425e+07	1.52796e+07	1.55249e+07	9.30726e+06	8.45768e+06	1.21424e+07	1.16429e+07	1.0378e+07	1.02827e+07	1.05425e+07	8.14785e+06
PE(16:1_20:5)	PE	M+Na	758.473	10.6816	C41 H70 O8 N1 P1 Na1	1.23596e+06	1.68551e+06	1.31169e+06	1.99931e+06	1.22311e+06	4.2468e+06	2.68395e+06	3.34501e+06	4.13924e+06	1.41982e+06	2.3445e+06	2.24968e+06	2.38162e+06	2.20387e+06	2.2304e+06	2.32158e+06	2.15752e+06
PE(14:0p_22:6)	PE	M+H	720.496	11.7939	C41 H71 O7 N1 P1	4.62463e+06	2.57487e+06	3.36658e+06	5.44456e+06	3.35464e+06	4.54796e+06	5.88124e+06	5.9965e+06	6.8773e+06	3.71607e+06	4.35946e+06	4.85455e+06	4.72333e+06	4.07661e+06	4.40167e+06	4.04805e+06	5.07873e+06
PE(37:0e)	PE	M+Na	770.603	16.1689	C42 H86 O7 N1 P1 Na1	3.0875e+07	3.56766e+07	2.72097e+07	3.53664e+07	1.68845e+07	3.49834e+07	5.05673e+07	4.76701e+07	3.56723e+07	2.71343e+07	3.06657e+07	3.15886e+07	3.00142e+07	3.11498e+07	2.99377e+07	3.09988e+07	3.14027e+07
PE(37:1)	PE	M+Na	782.567	14.5134	C42 H82 O8 N1 P1 Na1	1.69757e+07	2.04936e+07	3.91995e+07	1.96287e+07	2.00082e+07	2.93941e+07	1.93222e+07	4.22359e+07	2.4851e+07	1.78153e+07	1.9328e+07	1.76389e+07	4.12295e+07	1.5552e+07	1.44351e+07	4.745e+07	4.66622e+07
PE(37:1e)	PE	M+Na	768.588	14.9032	C42 H84 O7 N1 P1 Na1	1.48763e+08	1.60087e+08	1.65647e+08	1.71535e+08	1.37372e+08	1.40314e+08	1.82121e+08	1.824e+08	1.70835e+08	1.52712e+08	1.59354e+08	1.60595e+08	1.60229e+08	1.65496e+08	1.71772e+08	1.6464e+08	1.57332e+08
PE(17:0_20:2)	PE	M+Na	780.551	13.35	C42 H80 O8 N1 P1 Na1	2.73594e+07	5.11941e+07	2.00441e+07	2.11744e+07	3.75941e+07	3.31414e+07	3.27468e+07	2.31639e+07	6.83789e+07	4.81655e+07	3.32537e+07	4.62101e+07	3.31335e+07	2.9417e+07	2.71658e+07	1.9894e+07	2.73683e+07
PE(37:2e)	PE	M+Na	766.572	13.8479	C42 H82 O7 N1 P1 Na1	3.55393e+07	3.47248e+07	3.52016e+07	2.94618e+07	2.01432e+07	1.91086e+07	3.2417e+07	3.27475e+07	2.37251e+07	2.51249e+07	3.05458e+07	2.84467e+07	2.86052e+07	2.98528e+07	2.82796e+07	2.90589e+07	2.85949e+07
PE(17:0_20:3)	PE	M+Na	778.536	13.3577	C42 H78 O8 N1 P1 Na1	2.50333e+08	2.63099e+08	2.14532e+08	2.41631e+08	2.30265e+08	3.27913e+08	4.0162e+08	2.56128e+08	2.51457e+08	2.56777e+08	2.68763e+08	2.55674e+08	2.63863e+08	2.55926e+08	2.69831e+08	2.69219e+08	2.69634e+08
PE(37:3e)	PE	M+H	742.575	14.8984	C42 H81 O7 N1 P1	1.07714e+08	1.1239e+08	1.16287e+08	1.27809e+08	9.34725e+07	1.01954e+08	1.43836e+08	1.31521e+08	1.03662e+08	1.06572e+08	1.15578e+08	1.06885e+08	1.09701e+08	1.07991e+08	1.13395e+08	1.05694e+08	1.15693e+08
PE(17:1_20:3)	PE	M+Na	776.52	12.0146	C42 H76 O8 N1 P1 Na1	1.18591e+08	1.5457e+08	1.18619e+08	1.4233e+08	1.0669e+08	1.42521e+08	1.23634e+08	1.34593e+08	1.33876e+08	1.15256e+08	1.1682e+08	1.12577e+08	1.20753e+08	1.22241e+08	1.15354e+08	1.28958e+08	1.23892e+08
PE(37:4)	PE	M+H	754.538	13.086	C42 H77 O8 N1 P1	5.34003e+06	6.35396e+06	8.19037e+06	6.07207e+06	6.62692e+06	6.33478e+06	4.21401e+06	8.40909e+06	1.03517e+07	6.79167e+06	4.86297e+06	6.58671e+06	2.15946e+06	2.50472e+06	7.30376e+06	5.62449e+06	2.57205e+06
PE(17:1_20:4)	PE	M+H	752.522	12.4555	C42 H75 O8 N1 P1	1.42161e+08	1.92089e+08	1.54707e+08	1.88347e+08	1.15923e+08	1.73056e+08	1.28071e+08	1.75471e+08	2.03488e+08	1.42317e+08	1.6297e+08	1.61177e+08	1.59079e+08	1.57611e+08	1.60298e+08	1.59046e+08	1.64174e+08
PE(17:1_20:5)	PE	M+H	750.507	11.4384	C42 H73 O8 N1 P1	2.16832e+06	5.09838e+06	3.30615e+06	2.75091e+06	2.53991e+06	4.24369e+06	662678	2.17947e+06	3.41258e+06	1.47845e+06	3.09426e+06	2.9371e+06	3.37396e+06	2.59995e+06	1.8372e+06	3.20334e+06	3.26933e+06
PE(15:0_22:6)	PE	M+H	750.507	11.8965	C42 H73 O8 N1 P1	2.0691e+08	2.09743e+08	1.7529e+08	2.4402e+08	1.38009e+08	1.83543e+08	2.46132e+08	1.85851e+08	1.89805e+08	1.75287e+08	1.85616e+08	1.70318e+08	1.74732e+08	1.7807e+08	1.88794e+08	1.79365e+08	1.83171e+08
PE(18:0_20:0)	PE	M+Na	798.598	15.771	C43 H86 O8 N1 P1 Na1	1.59751e+08	1.76493e+08	1.27037e+08	1.52641e+08	9.57619e+07	1.42158e+08	6.51157e+07	1.50068e+08	1.54659e+08	1.00692e+08	1.39521e+08	1.35842e+08	1.34588e+08	1.30446e+08	1.26524e+08	1.29832e+08	1.26835e+08
PE(20:0_18:1)	PE	M+Na	796.583	15.7546	C43 H84 O8 N1 P1 Na1	7.83813e+08	8.36944e+08	5.73886e+08	5.7181e+08	4.64501e+08	6.25698e+08	4.37801e+08	6.56955e+08	8.27558e+08	4.15623e+08	6.33077e+08	6.16842e+08	6.19945e+08	6.04896e+08	6.04514e+08	6.06799e+08	6.504e+08
PE(18:0_20:1)	PE	M+H	774.601	16.8921	C43 H85 O8 N1 P1	1.37298e+08	1.49534e+08	1.28139e+08	1.69338e+08	1.07633e+08	2.61857e+08	2.42032e+08	2.18562e+08	2.15076e+08	1.68872e+08	1.65492e+08	1.74042e+08	1.62589e+08	1.63845e+08	1.63591e+08	1.60718e+08	1.66736e+08
PE(38:1)	PE	M+Na	796.583	16.8921	C43 H84 O8 N1 P1 Na1	1.48345e+07	1.53359e+07	1.26869e+07	1.52475e+07	1.24246e+07	2.07981e+07	1.79403e+07	1.91777e+07	1.82472e+07	1.58532e+07	1.55075e+07	1.481e+07	1.4976e+07	1.55639e+07	1.73713e+07	1.45371e+07	1.52818e+07
PE(38:1e)	PE	M+Na	782.603	16.551	C43 H86 O7 N1 P1 Na1	3.21639e+07	4.05874e+07	3.19698e+07	3.84814e+07	2.84724e+07	6.40404e+07	5.59376e+07	5.13916e+07	5.42204e+07	4.17295e+07	4.37096e+07	4.2919e+07	3.83816e+07	4.11818e+07	3.94577e+07	3.84547e+07	4.16942e+07
PE(38:2)	PE	M+Na	794.567	13.0248	C43 H82 O8 N1 P1 Na1	3.26399e+06	5.07507e+06	1.11835e+07	2.73082e+06	3.28904e+06	6.79042e+06	2.47586e+06	568614	2.60755e+06	420172	1.33163e+06	2.22813e+06	4.94911e+06	3.43858e+07	8.38293e+06	1.76565e+06	5.44332e+06
PE(20:1_18:1)	PE	M+Na	794.567	14.4817	C43 H82 O8 N1 P1 Na1	5.1757e+08	5.36683e+08	4.94266e+08	5.55408e+08	4.90112e+08	6.49882e+08	6.74598e+08	5.77372e+08	6.2096e+08	5.36879e+08	5.4915e+08	5.64242e+08	5.41361e+08	5.54299e+08	5.34947e+08	5.18175e+08	5.43149e+08
PE(20:0_18:2)	PE	M+Na	794.567	14.9737	C43 H82 O8 N1 P1 Na1	4.83561e+08	4.96695e+08	4.45371e+08	5.14211e+08	4.31743e+08	7.57644e+08	8.81376e+08	6.35111e+08	6.10987e+08	5.33509e+08	5.33761e+08	5.24993e+08	5.53099e+08	5.22168e+08	4.96066e+08	5.24027e+08	5.12398e+08
PE(38:2e)	PE	M+Na	780.588	15.9115	C43 H84 O7 N1 P1 Na1	1.65448e+08	1.92686e+08	1.97805e+08	2.4523e+08	1.27991e+08	2.23236e+08	3.02499e+08	2.3753e+08	2.00455e+08	1.37884e+08	1.90054e+08	1.80872e+08	1.80378e+08	1.7849e+08	1.72077e+08	1.82584e+08	1.8682e+08
PE(20:1e_18:1)	PE	M+Na	780.588	16.3563	C43 H84 O7 N1 P1 Na1	1.13204e+08	1.39478e+08	1.10498e+08	1.38915e+08	9.34582e+07	2.09462e+08	2.3865e+08	1.99016e+08	1.57252e+08	1.36587e+08	1.49127e+08	1.4332e+08	1.24694e+08	1.40169e+08	1.30264e+08	1.35895e+08	1.35575e+08
PE(18:1p_20:1)	PE	M+H	756.59	16.3993	C43 H83 O7 N1 P1	8.88363e+06	1.13705e+07	1.38414e+07	1.7366e+07	7.87857e+06	1.72413e+07	1.63517e+07	1.80032e+07	1.50117e+07	1.18033e+07	1.0678e+07	1.23049e+07	9.7592e+06	1.08523e+07	9.65358e+06	1.19102e+07	1.1691e+07
PE(38:3)	PE	M+Na	792.551	12.4998	C43 H80 O8 N1 P1 Na1	5.01416e+08	4.97843e+08	3.88789e+08	4.62088e+08	3.36004e+08	7.32617e+08	7.48399e+08	4.8848e+08	6.99324e+08	4.50734e+08	5.06606e+08	4.87352e+08	4.72477e+08	4.90277e+08	4.78258e+08	4.78021e+08	4.88746e+08
PE(18:1_20:2)	PE	M+Na	792.551	14.0519	C43 H80 O8 N1 P1 Na1	4.70937e+09	4.54899e+09	3.94693e+09	3.82481e+09	4.77269e+09	5.98043e+09	6.17588e+09	4.52002e+09	4.73895e+09	5.05651e+09	4.88975e+09	4.91758e+09	4.74092e+09	4.80468e+09	4.90843e+09	4.97472e+09	4.85332e+09
PE(38:3e)	PE	M+Na	778.572	13.9792	C43 H82 O7 N1 P1 Na1	1.22268e+07	1.55309e+07	1.55392e+07	1.46608e+07	6.9102e+06	2.07301e+07	2.72229e+07	1.98894e+07	2.09901e+07	1.44474e+07	1.72179e+07	1.3104e+07	1.31783e+07	1.30352e+07	1.61712e+07	1.63307e+07	1.55342e+07
PE(18:0p_20:3)	PE	M+H	754.575	15.6966	C43 H81 O7 N1 P1	3.70354e+07	4.26781e+07	4.67297e+07	5.21798e+07	2.97541e+07	7.59133e+07	7.33321e+07	7.37106e+07	6.54039e+07	4.50084e+07	4.8047e+07	5.07938e+07	4.66871e+07	4.52143e+07	4.51278e+07	4.73633e+07	4.74085e+07
PE(20:2_18:2)	PE	M+Na	790.536	12.026	C43 H78 O8 N1 P1 Na1	1.44809e+08	1.5797e+08	1.35771e+08	1.66136e+08	1.32137e+08	2.05371e+08	2.14551e+08	1.66637e+08	1.71392e+08	1.63356e+08	1.56881e+08	1.46775e+08	1.47456e+08	1.52488e+08	1.50106e+08	1.49629e+08	1.52308e+08
PE(18:1_20:3)	PE	M+Na	790.536	12.7789	C43 H78 O8 N1 P1 Na1	2.17406e+09	2.39955e+09	2.14457e+09	2.14394e+09	2.03179e+09	2.87593e+09	2.60079e+09	2.62113e+09	2.29866e+09	2.11874e+09	2.31755e+09	2.22672e+09	2.18678e+09	2.16338e+09	2.25862e+09	2.2731e+09	2.2745e+09
PE(20:4e_18:0)	PE	M+Na	776.556	13.6242	C43 H80 O7 N1 P1 Na1	2.94823e+06	2.65471e+06	1.33992e+07	1.35933e+07	9.10185e+06	4.7908e+07	3.87296e+07	2.90163e+07	5.40693e+07	1.06647e+07	1.74199e+07	4.0978e+07	6.86747e+06	1.52673e+07	4.84985e+06	1.53984e+07	9.8069e+06
PE(38:4e)	PE	M+Na	776.556	14.666	C43 H80 O7 N1 P1 Na1	3.3768e+08	3.71849e+08	3.53028e+08	4.12479e+08	2.67125e+08	3.82942e+08	5.7467e+08	3.89534e+08	3.58568e+08	2.82219e+08	3.54864e+08	3.50159e+08	3.54627e+08	3.38977e+08	3.55161e+08	3.48654e+08	3.34783e+08
PE(16:0p_22:4)	PE	M+H	752.559	14.7345	C43 H79 O7 N1 P1	3.84507e+08	4.31431e+08	4.96334e+08	5.92472e+08	3.47515e+08	4.4313e+08	6.64745e+08	5.07807e+08	4.32352e+08	3.83801e+08	4.31371e+08	4.38511e+08	4.37268e+08	4.31097e+08	4.35762e+08	4.40446e+08	4.36455e+08
PE(18:0p_20:4)	PE	M+H	752.559	15.1076	C43 H79 O7 N1 P1	8.56552e+08	9.28818e+08	9.92265e+08	1.18724e+09	6.69085e+08	1.27959e+09	1.51564e+09	1.1305e+09	1.14134e+09	7.8142e+08	1.00718e+09	9.99724e+08	9.42739e+08	9.81542e+08	9.6286e+08	9.13531e+08	9.35168e+08
PE(20:3_18:2)	PE	M+Na	788.52	11.005	C43 H76 O8 N1 P1 Na1	5.61003e+07	6.71135e+07	3.78556e+07	5.04352e+07	4.292e+07	1.08442e+08	1.08524e+08	7.55896e+07	6.1536e+07	5.3833e+07	6.33772e+07	6.16242e+07	6.32436e+07	5.79555e+07	6.27462e+07	5.59332e+07	5.78174e+07
PE(18:1_20:4)	PE	M+H	766.538	13.1751	C43 H77 O8 N1 P1	6.82908e+09	8.08726e+09	7.23615e+09	7.45569e+09	6.12923e+09	8.3163e+09	7.37184e+09	8.31877e+09	7.49206e+09	6.95348e+09	7.36682e+09	7.38014e+09	7.30827e+09	7.31388e+09	7.25627e+09	7.23038e+09	7.32605e+09
PE(38:5e)	PE	M+H	752.559	14.727	C43 H79 O7 N1 P1	3.84507e+08	4.31431e+08	4.96334e+08	5.92592e+08	3.47515e+08	4.4313e+08	6.64167e+08	5.07797e+08	4.32352e+08	3.82935e+08	4.23372e+08	4.38567e+08	4.37278e+08	4.31114e+08	4.35762e+08	4.40525e+08	4.36455e+08
PE(18:1p_20:4)	PE	M+H	750.543	13.7759	C43 H77 O7 N1 P1	5.37859e+08	6.74716e+08	6.85866e+08	8.33227e+08	5.3127e+08	9.20775e+08	1.06381e+09	8.9434e+08	8.51325e+08	6.18998e+08	6.82364e+08	7.02786e+08	6.73223e+08	6.86563e+08	6.63798e+08	7.01012e+08	6.77775e+08
PE(16:0p_22:5)	PE	M+H	750.543	14.2686	C43 H77 O7 N1 P1	5.60882e+07	6.0077e+07	6.25409e+07	8.62047e+07	5.34099e+07	9.03087e+07	1.02488e+08	8.09607e+07	6.91242e+07	5.44407e+07	7.36562e+07	7.15507e+07	6.47585e+07	7.38641e+07	6.70587e+07	5.61865e+07	6.02707e+07
PE(18:1_20:5)	PE	M+H	764.522	10.2128	C43 H75 O8 N1 P1	5.9777e+06	8.93621e+06	6.58043e+06	1.06196e+07	5.32004e+06	1.09034e+07	8.83564e+06	8.66849e+06	8.81772e+06	8.10478e+06	8.37025e+06	6.28601e+06	6.24391e+06	6.37638e+06	7.67097e+06	8.40269e+06	6.05046e+06
PE(18:3_20:3)	PE	M+Na	786.504	10.5003	C43 H74 O8 N1 P1 Na1	5.2736e+07	6.75446e+07	4.18801e+07	4.25063e+07	4.10956e+07	8.70619e+07	6.14072e+07	8.66828e+07	7.68511e+07	6.29999e+07	5.4254e+07	8.12093e+07	5.30913e+07	5.36721e+07	5.32117e+07	5.22277e+07	5.43235e+07
PE(18:2_20:4)	PE	M+Na	786.504	11.9657	C43 H74 O8 N1 P1 Na1	7.18407e+07	7.09095e+07	6.22725e+07	5.63873e+07	5.98827e+07	7.03375e+07	5.96436e+07	7.01555e+07	7.81661e+07	6.36863e+07	6.36151e+07	5.69618e+07	6.50698e+07	6.32168e+07	6.62689e+07	6.4467e+07	6.25014e+07
PE(38:6e)	PE	M+Na	772.525	12.1778	C43 H76 O7 N1 P1 Na1	1.21361e+07	1.8762e+07	1.74927e+07	2.17281e+07	1.22738e+07	1.07358e+07	3.22667e+07	1.52075e+07	1.45932e+07	8.99674e+06	1.83573e+07	1.786e+07	1.82217e+07	1.63051e+07	1.68073e+07	1.55913e+07	1.76509e+07
PE(18:2p_20:4)	PE	M+H	748.528	12.6229	C43 H75 O7 N1 P1	6.18848e+06	7.44116e+06	1.6959e+07	1.12755e+07	9.2488e+06	960156	3.61946e+06	4.5708e+06	1.54044e+06	4.94504e+06	9.32464e+06	7.74209e+06	4.92266e+06	7.61967e+06	6.6942e+06	6.35832e+06	6.31267e+06
PE(16:0p_22:6)	PE	M+H	748.528	13.2787	C43 H75 O7 N1 P1	5.48322e+08	5.99198e+08	6.08988e+08	7.30333e+08	4.94677e+08	6.84517e+08	1.20141e+09	6.57015e+08	6.18834e+08	5.44246e+08	6.36378e+08	6.1504e+08	6.3426e+08	6.02631e+08	6.19542e+08	5.88997e+08	5.91119e+08
PE(38:7)	PE	M+Na	784.489	9.70521	C43 H72 O8 N1 P1 Na1	3.04705e+06	4.39111e+06	2.95162e+06	2.88326e+06	3.46304e+06	8.73313e+06	5.05081e+06	3.52637e+06	9.71626e+06	2.67912e+06	4.18442e+06	4.10741e+06	4.42792e+06	4.17234e+06	3.96971e+06	4.30115e+06	4.14627e+06
PE(38:7e)	PE	M+Na	770.51	13.2789	C43 H74 O7 N1 P1 Na1	7.6051e+06	5.60655e+06	7.37458e+06	6.76832e+06	8.21511e+06	5.97283e+06	1.29096e+07	5.26517e+06	4.22771e+06	8.46716e+06	8.3811e+06	5.42818e+06	6.10143e+06	8.2383e+06	7.43967e+06	5.88298e+06	5.48828e+06
PE(38:8)	PE	M+H	760.491	9.9455	C43 H71 O8 N1 P1	1.70156e+06	2.58002e+06	1.56987e+06	1.25373e+06	1.15303e+06	2.37337e+06	1.12636e+06	2.28848e+06	2.35887e+06	1.05286e+06	1.69198e+06	1.69584e+06	1.58496e+06	1.61884e+06	1.69181e+06	1.73953e+06	1.64428e+06
PE(39:0e)	PE	M+Na	798.635	17.9812	C44 H90 O7 N1 P1 Na1	1.47807e+07	1.58211e+07	9.96125e+06	1.34642e+07	1.12821e+07	3.38627e+07	3.42151e+07	2.085e+07	2.09594e+07	1.42505e+07	1.63973e+07	1.65583e+07	1.58476e+07	1.6368e+07	1.55239e+07	1.68071e+07	1.59381e+07
PE(39:2e)	PE	M+H	772.621	17.1642	C44 H87 O7 N1 P1	2.40199e+08	2.03955e+08	1.95641e+08	2.18272e+08	2.15966e+08	3.06969e+08	3.26e+08	2.84965e+08	2.42222e+08	2.62685e+08	2.4368e+08	2.70233e+08	2.58709e+08	2.62867e+08	2.5587e+08	2.56135e+08	2.6766e+08
PE(19:0_20:3)	PE	M+Na	806.567	14.6068	C44 H82 O8 N1 P1 Na1	2.00568e+08	2.03446e+08	1.70167e+08	1.89319e+08	1.67274e+08	2.33334e+08	2.64891e+08	2.05454e+08	2.27838e+08	1.82539e+08	1.98705e+08	1.9657e+08	1.99978e+08	1.95354e+08	1.97295e+08	1.98242e+08	2.00448e+08
PE(39:3)	PE	M+Na	806.567	20.892	C44 H82 O8 N1 P1 Na1	856264	455031	0	498599	0	0	0	0	708469	0	473636	811208	496829	0	0	0	683803
PE(39:3e)	PE	M+H	770.606	16.174	C44 H85 O7 N1 P1	3.12993e+07	3.50721e+07	2.75749e+07	3.34765e+07	1.6878e+07	3.49891e+07	5.05751e+07	4.77378e+07	3.51023e+07	2.71736e+07	3.06605e+07	3.1858e+07	2.99977e+07	3.11543e+07	2.9861e+07	3.17301e+07	3.10044e+07
PE(19:1_20:3)	PE	M+Na	804.551	13.3611	C44 H80 O8 N1 P1 Na1	1.37934e+07	1.92609e+07	1.13221e+07	1.24736e+07	1.24147e+07	2.158e+07	1.19634e+07	2.06965e+07	8.00801e+06	8.22069e+06	1.80615e+07	7.81366e+06	1.4039e+07	1.47095e+07	1.37815e+07	1.19091e+07	1.66669e+07
PE(39:4e)	PE	M+Na	790.572	13.57	C44 H82 O7 N1 P1 Na1	6.36595e+07	6.69006e+07	7.0207e+07	5.94077e+07	7.02607e+07	4.61597e+07	7.65009e+07	5.34806e+07	4.69019e+07	6.07851e+07	6.16004e+07	5.8529e+07	5.67954e+07	5.48942e+07	6.14692e+07	5.84341e+07	5.8463e+07
PE(39:5e)	PE	M+H	766.575	13.8559	C44 H81 O7 N1 P1	3.55393e+07	3.47248e+07	3.52016e+07	2.94618e+07	2.01432e+07	1.91086e+07	3.2417e+07	3.27475e+07	2.37251e+07	2.51249e+07	3.05458e+07	2.84467e+07	2.86052e+07	2.98528e+07	2.82796e+07	2.90589e+07	2.85949e+07
PE(40:0)	PE	M+Na	826.63	15.593	C45 H90 O8 N1 P1 Na1	6.22304e+07	4.25343e+07	4.84744e+07	6.53672e+07	2.86938e+07	1.0218e+07	1.98027e+07	3.62559e+07	6.67612e+07	1.63888e+07	5.48655e+07	5.06697e+07	4.63216e+07	4.69604e+07	4.91789e+07	5.10857e+07	4.67296e+07
PE(40:0e)	PE	M+Na	812.65	18.519	C45 H92 O7 N1 P1 Na1	7.07117e+09	6.98157e+09	5.61546e+09	6.98076e+09	5.34255e+09	1.23555e+10	1.44336e+10	8.80847e+09	1.02422e+10	8.9217e+09	8.4933e+09	8.29803e+09	8.26356e+09	8.01092e+09	8.28359e+09	8.21684e+09	8.28972e+09
PE(18:0_22:1)	PE	M+Na	824.614	16.3506	C45 H88 O8 N1 P1 Na1	2.55532e+07	2.52506e+07	2.60041e+07	3.48913e+07	2.06009e+07	3.36263e+07	5.10029e+07	3.83641e+07	2.80099e+07	2.27781e+07	2.68008e+07	2.8287e+07	2.63279e+07	2.73902e+07	2.86556e+07	2.80803e+07	2.73317e+07
PE(18:1_22:0)	PE	M+Na	824.614	16.9229	C45 H88 O8 N1 P1 Na1	4.44164e+07	4.22588e+07	3.03631e+07	3.34413e+07	2.28391e+07	3.55141e+07	2.819e+07	3.95223e+07	3.91714e+07	1.95015e+07	3.37051e+07	3.41232e+07	3.4362e+07	3.34951e+07	3.14819e+07	3.16108e+07	3.38385e+07
PE(20:1_20:1)	PE	M+Na	822.598	14.301	C45 H86 O8 N1 P1 Na1	5.12577e+06	6.13514e+06	4.69877e+06	4.15575e+06	3.13989e+06	1.31311e+06	3.21938e+06	1.69785e+06	1.48206e+06	1.43599e+06	2.19332e+06	5.59005e+06	2.45056e+06	2.7939e+06	3.29359e+06	2.45179e+06	4.84155e+06
PE(18:1_22:1)	PE	M+Na	822.598	15.0405	C45 H86 O8 N1 P1 Na1	2.54224e+08	2.5487e+08	2.17846e+08	2.18639e+08	1.74076e+08	1.84956e+08	1.97388e+08	2.38594e+08	2.16616e+08	2.03391e+08	2.16688e+08	2.17605e+08	2.24737e+08	2.15843e+08	2.2165e+08	2.1388e+08	2.11127e+08
PE(40:2e)	PE	M+Na	808.619	17.447	C45 H88 O7 N1 P1 Na1	2.13965e+06	1.94208e+06	1.47973e+06	2.25195e+06	2.22116e+06	5.32117e+06	6.35177e+06	6.12953e+06	4.65418e+06	2.55547e+06	2.80676e+06	2.75196e+06	2.00995e+06	2.66444e+06	1.89887e+06	2.70324e+06	2.36454e+06
PE(18:0_22:3)	PE	M+Na	820.583	14.8631	C45 H84 O8 N1 P1 Na1	3.07384e+07	3.11432e+07	2.56533e+07	2.95843e+07	2.378e+07	3.74233e+07	4.17775e+07	3.50568e+07	3.24624e+07	2.78975e+07	3.18991e+07	3.38955e+07	2.99333e+07	2.91303e+07	2.58752e+07	3.10025e+07	3.04324e+07
PE(20:0_20:3)	PE	M+Na	820.583	15.3325	C45 H84 O8 N1 P1 Na1	2.99924e+08	2.93857e+08	2.00104e+08	2.02672e+08	2.02763e+08	2.07431e+08	1.7885e+08	2.33359e+08	2.43259e+08	1.58893e+08	2.22865e+08	2.19429e+08	2.23831e+08	2.08697e+08	2.06241e+08	2.21152e+08	2.14573e+08
PE(40:3e)	PE	M+Na	806.603	16.138	C45 H86 O7 N1 P1 Na1	2.30334e+07	3.04203e+07	2.10025e+07	2.79772e+07	1.98077e+07	5.04227e+07	6.08929e+07	3.73017e+07	4.14933e+07	3.32594e+07	3.13518e+07	2.95065e+07	3.11124e+07	3.47666e+07	3.03355e+07	3.28107e+07	3.19267e+07
PE(40:4)	PE	M+Na	818.567	12.5684	C45 H82 O8 N1 P1 Na1	6.92578e+07	8.16755e+07	6.34411e+07	6.818e+07	5.30352e+07	9.75109e+07	8.369e+07	8.35078e+07	9.28737e+07	6.88796e+07	7.71844e+07	7.21957e+07	6.87244e+07	6.66123e+07	7.00263e+07	7.33882e+07	7.04352e+07
PE(20:1_20:3)	PE	M+Na	818.567	14.0158	C45 H82 O8 N1 P1 Na1	1.3648e+08	1.58698e+08	1.34868e+08	1.25832e+08	1.17771e+08	1.13946e+08	8.54656e+07	1.43415e+08	1.20672e+08	1.12839e+08	1.26047e+08	1.3151e+08	1.27078e+08	1.27609e+08	1.32524e+08	1.3113e+08	1.36339e+08
PE(40:4e)	PE	M+H	782.606	16.5533	C45 H85 O7 N1 P1	3.21639e+07	4.05874e+07	3.19698e+07	3.84814e+07	2.84724e+07	6.40404e+07	5.59376e+07	5.13916e+07	5.42204e+07	4.17295e+07	4.37096e+07	4.2919e+07	3.83816e+07	4.11818e+07	3.94577e+07	3.84547e+07	4.16942e+07
PE(18:0p_22:4)	PE	M+H	780.59	16.0048	C45 H83 O7 N1 P1	1.65448e+08	1.92686e+08	1.97805e+08	2.45595e+08	1.27991e+08	2.23236e+08	3.02499e+08	2.3753e+08	2.00455e+08	1.37884e+08	1.90054e+08	1.80872e+08	1.80378e+08	1.79103e+08	1.72077e+08	1.828e+08	1.8682e+08
PE(20:0p_20:4)	PE	M+H	780.59	16.3578	C45 H83 O7 N1 P1	1.18453e+08	1.38474e+08	1.13768e+08	1.4341e+08	9.78488e+07	2.10626e+08	2.38782e+08	2.05251e+08	1.6027e+08	1.37508e+08	1.4944e+08	1.46075e+08	1.31623e+08	1.40211e+08	1.30512e+08	1.35881e+08	1.35767e+08
PE(20:2_20:3)	PE	M+Na	816.551	12.0819	C45 H80 O8 N1 P1 Na1	6.21097e+07	5.95851e+07	6.48304e+07	6.66258e+07	5.8577e+07	4.3197e+07	4.49428e+07	5.12563e+07	4.80566e+07	5.64852e+07	5.83757e+07	5.77805e+07	5.58565e+07	5.26166e+07	5.40861e+07	5.61376e+07	5.72295e+07
PE(20:1_20:4)	PE	M+H	794.569	14.4805	C45 H81 O8 N1 P1	5.20797e+08	5.39289e+08	4.98924e+08	5.60507e+08	4.91759e+08	6.54859e+08	6.82346e+08	5.80499e+08	6.26192e+08	5.41561e+08	5.52462e+08	5.67467e+08	5.43696e+08	5.59875e+08	5.42052e+08	5.22275e+08	5.47311e+08
PE(18:0_22:5)	PE	M+H	794.569	14.9759	C45 H81 O8 N1 P1	4.83561e+08	4.96695e+08	4.45371e+08	5.14211e+08	4.31743e+08	7.57644e+08	8.81376e+08	6.35111e+08	6.10987e+08	5.33509e+08	5.33761e+08	5.24993e+08	5.53099e+08	5.22168e+08	4.96066e+08	5.24027e+08	5.12398e+08
PE(40:5e)	PE	M+Na	802.572	16.3473	C45 H82 O7 N1 P1 Na1	9.13772e+06	1.05794e+07	8.9809e+06	1.10937e+07	8.17605e+06	1.26017e+07	1.81997e+07	1.60036e+07	1.09278e+07	1.12645e+07	1.22662e+07	1.05835e+07	1.15172e+07	1.22994e+07	1.17852e+07	9.86623e+06	1.21066e+07
PE(18:1p_22:4)	PE	M+H	778.575	14.718	C45 H81 O7 N1 P1	1.8864e+08	2.1186e+08	1.97114e+08	2.29755e+08	1.53558e+08	4.25444e+07	6.24336e+07	2.1634e+08	2.40688e+08	1.98655e+08	1.97227e+08	2.0195e+08	1.97486e+08	1.95118e+08	1.9209e+08	1.91066e+08	1.98181e+08
PE(18:0p_22:5)	PE	M+H	778.575	15.0939	C45 H81 O7 N1 P1	1.39413e+08	1.49557e+08	1.50776e+08	4.22962e+08	1.08711e+08	2.08983e+08	2.52762e+08	1.83815e+08	1.90408e+08	1.26487e+08	1.60886e+08	1.65875e+08	1.48183e+08	1.53434e+08	1.52413e+08	1.4719e+08	1.49099e+08
PE(20:3_20:3)	PE	M+Na	814.536	11.8857	C45 H78 O8 N1 P1 Na1	8.23176e+07	9.0503e+07	7.67038e+07	7.23118e+07	7.28082e+07	8.35551e+07	6.67623e+07	9.81728e+07	6.61625e+07	7.33837e+07	7.22339e+07	7.90262e+07	8.16144e+07	7.79914e+07	8.36607e+07	7.64216e+07	8.16395e+07
PE(40:6)	PE	M+H	792.554	12.493	C45 H79 O8 N1 P1	5.01778e+08	4.96721e+08	3.86103e+08	4.63056e+08	3.30689e+08	7.06718e+08	7.30099e+08	4.77581e+08	7.00125e+08	4.3785e+08	4.95462e+08	4.58025e+08	4.66782e+08	4.70018e+08	4.75635e+08	4.78377e+08	4.8302e+08
PE(18:1_22:5)	PE	M+H	792.554	13.3504	C45 H79 O8 N1 P1	1.98623e+08	1.98226e+08	1.84303e+08	2.00429e+08	1.50873e+08	1.91225e+08	2.20636e+08	2.45839e+08	1.78694e+08	2.62139e+08	1.90506e+08	1.7905e+08	1.91711e+08	2.45614e+08	2.02135e+08	1.90483e+08	1.70353e+08
PE(18:0_22:6)	PE	M+H	792.554	14.0527	C45 H79 O8 N1 P1	4.70937e+09	4.54899e+09	3.94693e+09	3.82481e+09	4.77269e+09	5.98043e+09	6.17588e+09	4.52002e+09	4.73895e+09	5.05651e+09	4.88975e+09	4.91758e+09	4.74092e+09	4.80468e+09	4.90843e+09	4.97472e+09	4.85332e+09
PE(40:6e)	PE	M+H	778.575	13.984	C45 H81 O7 N1 P1	1.22268e+07	1.55309e+07	1.55392e+07	1.46608e+07	6.9102e+06	2.07301e+07	2.72229e+07	1.98894e+07	2.09901e+07	1.44474e+07	1.72179e+07	1.3104e+07	1.31783e+07	1.30352e+07	1.61712e+07	1.63307e+07	1.55342e+07
PE(18:1p_22:5)	PE	M+H	776.559	13.849	C45 H79 O7 N1 P1	4.10788e+07	5.64428e+07	5.82737e+07	7.30134e+07	4.78071e+07	1.03185e+08	1.23712e+08	8.33751e+07	8.54177e+07	5.20023e+07	6.67436e+07	6.81672e+07	5.92223e+07	6.4271e+07	5.76786e+07	6.78139e+07	5.86067e+07
PE(18:0p_22:6)	PE	M+H	776.559	14.6577	C45 H79 O7 N1 P1	3.4082e+08	3.7174e+08	3.53028e+08	4.12479e+08	2.67125e+08	3.82942e+08	5.7467e+08	3.89534e+08	3.55868e+08	2.82219e+08	3.54864e+08	3.50159e+08	3.5318e+08	3.38065e+08	3.55161e+08	3.48654e+08	3.34783e+08
PE(40:7)	PE	M+H	790.538	10.354	C45 H77 O8 N1 P1	3.64934e+06	9.03249e+06	7.58381e+06	1.63595e+07	2.41009e+06	1.87417e+07	6.73129e+06	5.17187e+06	9.74167e+06	1.45866e+07	5.29674e+06	4.70359e+06	1.70741e+07	5.50441e+06	6.35626e+06	1.41964e+07	4.55778e+06
PE(22:5_18:2)	PE	M+H	790.538	12.1752	C45 H77 O8 N1 P1	1.44809e+08	1.5797e+08	1.35771e+08	1.66136e+08	1.32137e+08	2.05371e+08	2.14551e+08	1.66637e+08	1.71392e+08	1.63356e+08	1.56881e+08	1.46775e+08	1.47456e+08	1.52488e+08	1.50106e+08	1.49629e+08	1.52308e+08
PE(18:1_22:6)	PE	M+H	790.538	12.7698	C45 H77 O8 N1 P1	2.17948e+09	2.39961e+09	2.13952e+09	2.14159e+09	2.0311e+09	2.87627e+09	2.60009e+09	2.61813e+09	2.2982e+09	2.11362e+09	2.31799e+09	2.22657e+09	2.19243e+09	2.16455e+09	2.25721e+09	2.27381e+09	2.27032e+09
PE(40:7e)	PE	M+Na	798.541	14.6567	C45 H78 O7 N1 P1 Na1	1.25141e+07	1.13961e+07	1.48235e+07	1.20221e+07	1.20442e+07	4.41746e+06	1.52466e+07	7.92364e+06	6.46258e+06	9.08877e+06	1.04635e+07	1.14366e+07	1.17059e+07	1.04065e+07	1.14131e+07	9.86192e+06	9.21456e+06
PE(18:1p_22:6)	PE	M+H	774.543	13.36	C45 H77 O7 N1 P1	9.64565e+07	1.20481e+08	1.31118e+08	1.52665e+08	1.10732e+08	1.59742e+08	2.14839e+08	1.53898e+08	1.33611e+08	1.24776e+08	1.32086e+08	1.28441e+08	1.28724e+08	1.2897e+08	1.35632e+08	1.32148e+08	1.22255e+08
PE(40:8)	PE	M+Na	810.504	10.1977	C45 H74 O8 N1 P1 Na1	5.28125e+06	7.2467e+06	5.25367e+06	4.39385e+06	5.81545e+06	1.42842e+07	5.5898e+06	6.70311e+06	8.76661e+06	5.02574e+06	6.04907e+06	7.05318e+06	6.63949e+06	7.62887e+06	6.4284e+06	7.35551e+06	6.91285e+06
PE(40:8e)	PE	M+Na	796.525	9.119	C45 H76 O7 N1 P1 Na1	2.32405e+07	3.32255e+07	2.03256e+07	2.15646e+07	8.09895e+06	1.68318e+07	6.67328e+06	7.57531e+06	3.72069e+07	1.93069e+07	1.78961e+07	1.77969e+07	1.76197e+07	1.8826e+07	1.77732e+07	1.86213e+07	2.00773e+07
PE(18:2p_22:6)	PE	M+H	772.528	12.1815	C45 H75 O7 N1 P1	1.19304e+07	1.8539e+07	1.71783e+07	2.08832e+07	1.22883e+07	1.07505e+07	3.19012e+07	1.41936e+07	1.46263e+07	8.62158e+06	1.8189e+07	1.77591e+07	1.7991e+07	1.61686e+07	1.64267e+07	1.51177e+07	1.75791e+07
PE(40:9)	PE	M+Na	808.489	10.4983	C45 H72 O8 N1 P1 Na1	3.48431e+06	4.6139e+06	2.95117e+06	3.05073e+06	2.72764e+06	6.20935e+06	3.84424e+06	3.68247e+06	6.88858e+06	2.986e+06	3.2906e+06	3.82657e+06	3.46821e+06	4.00864e+06	3.90898e+06	5.53055e+06	4.09732e+06
PE(41:2e)	PE	M+Na	822.635	16.4313	C46 H90 O7 N1 P1 Na1	8.05051e+06	9.98894e+06	6.54025e+06	6.188e+06	2.98658e+06	6.10296e+06	8.68852e+06	7.97343e+06	8.04718e+06	6.46126e+06	6.46542e+06	6.35729e+06	5.89515e+06	5.35783e+06	5.34923e+06	5.26165e+06	5.74594e+06
PE(41:3e)	PE	M+H	798.637	17.976	C46 H89 O7 N1 P1	1.47807e+07	1.58211e+07	9.96125e+06	1.34642e+07	1.12821e+07	3.38627e+07	3.42151e+07	2.085e+07	2.09594e+07	1.42505e+07	1.63973e+07	1.65583e+07	1.58476e+07	1.6368e+07	1.55239e+07	1.68071e+07	1.59381e+07
PE(41:4e)	PE	M+Na	818.603	14.927	C46 H86 O7 N1 P1 Na1	3.53218e+07	3.99713e+07	3.62507e+07	3.40172e+07	2.88158e+07	2.6053e+07	4.736e+07	3.66537e+07	3.24113e+07	3.0207e+07	3.56818e+07	3.39677e+07	3.42491e+07	3.63157e+07	3.66517e+07	3.479e+07	3.5693e+07
PE(41:5e)	PE	M+H	794.606	15.178	C46 H85 O7 N1 P1	5.84342e+07	6.26154e+07	4.80738e+07	3.59266e+07	2.16574e+07	2.41349e+07	5.26005e+07	4.24529e+07	4.39445e+07	3.50782e+07	3.95468e+07	3.70219e+07	3.80106e+07	3.49854e+07	3.67836e+07	3.58659e+07	3.86703e+07
PE(19:1_22:6)	PE	M+H	804.554	13.3542	C46 H79 O8 N1 P1	1.37934e+07	1.92609e+07	1.13221e+07	1.24736e+07	1.24147e+07	2.158e+07	1.19634e+07	2.06965e+07	8.00801e+06	8.22069e+06	1.80615e+07	7.81366e+06	1.4039e+07	1.47095e+07	1.37815e+07	1.31363e+07	1.66669e+07
PE(42:0)	PE	M+Na	854.661	15.795	C47 H94 O8 N1 P1 Na1	7.7727e+06	5.24787e+06	7.06844e+06	7.83321e+06	2.71333e+06	4.90508e+06	1.15982e+07	4.62162e+06	8.44502e+06	4.18165e+06	9.97686e+06	8.79919e+06	4.9186e+06	8.40491e+06	9.07214e+06	4.51192e+06	5.69535e+06
PE(18:1_24:0)	PE	M+Na	852.645	17.8772	C47 H92 O8 N1 P1 Na1	1.51876e+07	1.46082e+07	9.71597e+06	1.35925e+07	8.723e+06	1.05464e+07	1.34615e+07	1.46082e+07	1.01029e+07	6.52005e+06	1.08499e+07	1.12056e+07	1.22349e+07	1.19606e+07	1.08176e+07	1.04771e+07	1.39032e+07
PE(42:2)	PE	M+H	828.648	15.7995	C47 H91 O8 N1 P1	5.87325e+07	5.74532e+07	5.80504e+07	6.1414e+07	3.06959e+07	9.59234e+07	1.13227e+08	6.19382e+07	8.88298e+07	5.41406e+07	5.73964e+07	5.23807e+07	5.68835e+07	5.48065e+07	5.40866e+07	5.07098e+07	5.50702e+07
PE(18:1_24:1)	PE	M+Na	850.63	16.826	C47 H90 O8 N1 P1 Na1	1.48482e+07	1.4963e+07	1.31089e+07	1.50082e+07	9.46016e+06	1.02474e+07	1.25425e+07	1.20623e+07	1.38194e+07	7.9945e+06	1.22734e+07	1.25562e+07	8.40847e+06	1.31482e+07	1.34133e+07	1.01762e+07	1.03783e+07
PE(22:0_20:3)	PE	M+Na	848.614	16.5462	C47 H88 O8 N1 P1 Na1	1.22026e+07	1.02898e+07	6.58643e+06	7.98928e+06	7.52245e+06	8.70928e+06	6.34451e+06	7.70594e+06	9.47072e+06	5.2766e+06	9.2128e+06	9.68916e+06	8.13768e+06	7.28732e+06	8.40681e+06	8.73666e+06	7.64953e+06
PE(42:3e)	PE	M+H	812.653	18.4975	C47 H91 O7 N1 P1	7.18261e+09	7.0678e+09	5.6473e+09	6.91547e+09	5.35556e+09	1.2088e+10	1.46116e+10	8.93698e+09	1.01937e+10	8.94789e+09	8.39694e+09	8.21194e+09	8.34968e+09	8.17548e+09	8.26218e+09	8.10257e+09	8.35745e+09
PE(20:3_22:1)	PE	M+Na	846.598	15.2589	C47 H86 O8 N1 P1 Na1	1.26759e+07	1.27376e+07	1.04997e+07	1.01201e+07	1.06869e+07	8.5253e+06	5.39585e+06	1.21624e+07	1.31611e+07	7.28672e+06	1.10796e+07	1.03122e+07	9.92796e+06	9.9166e+06	9.04276e+06	8.8408e+06	1.02341e+07
PE(20:0_22:6)	PE	M+H	820.585	15.3308	C47 H83 O8 N1 P1	2.99924e+08	2.93857e+08	2.00104e+08	2.02672e+08	2.02763e+08	2.07431e+08	1.7885e+08	2.33359e+08	2.43259e+08	1.58893e+08	2.22865e+08	2.19429e+08	2.23831e+08	2.08697e+08	2.06241e+08	2.21152e+08	2.14573e+08
PE(42:6e)	PE	M+H	806.606	16.1313	C47 H85 O7 N1 P1	2.30334e+07	3.04203e+07	2.10025e+07	2.79772e+07	1.98077e+07	5.04227e+07	6.08929e+07	3.73017e+07	4.14933e+07	3.32594e+07	3.13518e+07	2.95065e+07	3.11124e+07	3.47666e+07	3.03355e+07	3.28107e+07	3.19267e+07
PE(20:0p_22:6)	PE	M+H	804.59	15.937	C47 H83 O7 N1 P1	5.62143e+07	7.00365e+07	5.1491e+07	6.74798e+07	4.90417e+07	1.07268e+08	1.2564e+08	1.09247e+08	7.83999e+07	5.83442e+07	7.31361e+07	6.86432e+07	7.00523e+07	6.48616e+07	6.67031e+07	6.76576e+07	6.72915e+07
PE(20:1_22:6)	PE	M+H	818.569	14.0183	C47 H81 O8 N1 P1	1.36528e+08	1.59464e+08	1.35809e+08	1.26921e+08	1.18972e+08	1.09738e+08	8.62606e+07	1.43007e+08	1.20574e+08	1.13098e+08	1.25853e+08	1.31096e+08	1.25836e+08	1.25209e+08	1.26215e+08	1.30289e+08	1.3535e+08
PE(42:7e)	PE	M+Na	826.572	15.9207	C47 H82 O7 N1 P1 Na1	7.24068e+06	7.75026e+06	6.18442e+06	8.2037e+06	5.9e+06	1.22361e+07	1.22371e+07	1.0575e+07	8.093e+06	6.52863e+06	8.50154e+06	7.93365e+06	7.94524e+06	7.20567e+06	7.63894e+06	7.62952e+06	7.57026e+06
PE(20:1p_22:6)	PE	M+H	802.575	14.6283	C47 H81 O7 N1 P1	5.74565e+06	6.63102e+06	6.31942e+06	1.19338e+07	5.01768e+06	7.68764e+06	1.22722e+07	7.7904e+06	7.53669e+06	3.72962e+06	7.30296e+06	6.05753e+06	5.49519e+06	6.55068e+06	7.22241e+06	6.84927e+06	4.94455e+06
PE(20:3_22:5)	PE	M+Na	838.536	11.2666	C47 H78 O8 N1 P1 Na1	2.24979e+06	1.75392e+06	1.41945e+06	2.50496e+06	3.17301e+06	9.11015e+06	7.42208e+06	2.59814e+06	2.38445e+06	1.14289e+06	4.18441e+06	3.15346e+06	3.66921e+06	4.13249e+06	4.34518e+06	2.98367e+06	2.41886e+06
PE(42:8)	PE	M+H	816.554	12.457	C47 H79 O8 N1 P1	2.09158e+07	2.35614e+07	2.30114e+07	2.24983e+07	1.84709e+07	2.49203e+07	2.17579e+07	2.44932e+07	2.34673e+07	1.92634e+07	2.2737e+07	2.09889e+07	2.20326e+07	2.31443e+07	2.26164e+07	2.16955e+07	2.05901e+07
PE(20:2_22:6)	PE	M+H	816.554	12.8775	C47 H79 O8 N1 P1	7.47221e+07	8.26471e+07	6.85685e+07	7.33908e+07	6.08782e+07	5.78899e+07	7.45137e+07	1.01043e+08	5.54627e+07	4.42209e+07	7.20055e+07	6.76664e+07	7.28461e+07	6.47185e+07	7.3273e+07	6.84246e+07	7.31797e+07
PE(20:3_22:6)	PE	M+Na	836.52	10.7764	C47 H76 O8 N1 P1 Na1	3.02069e+07	3.8483e+07	2.80054e+07	2.58755e+07	4.89143e+07	1.02807e+08	8.82817e+07	4.6299e+07	3.87704e+07	4.10042e+07	4.66728e+07	4.49061e+07	4.26378e+07	4.45114e+07	4.1776e+07	4.17026e+07	4.20879e+07
PE(42:9)	PE	M+H	814.538	10.7764	C47 H77 O8 N1 P1	1.41841e+07	1.54973e+07	1.30925e+07	1.33104e+07	1.30127e+07	1.9029e+07	3.13585e+07	1.88233e+07	2.16888e+07	1.46778e+07	1.74083e+07	2.01226e+07	1.61406e+07	1.82602e+07	1.66424e+07	1.71546e+07	1.8244e+07
PE(43:0)	PE	M+Na	868.677	18.498	C48 H96 O8 N1 P1 Na1	5.50394e+07	5.05576e+07	4.60752e+07	4.91488e+07	4.82251e+07	5.44017e+07	6.02968e+07	5.59895e+07	4.53159e+07	5.35903e+07	5.11046e+07	5.28473e+07	5.14655e+07	5.12444e+07	5.37079e+07	5.40799e+07	5.23761e+07
PE(43:0e)	PE	M+Na	854.697	18.5102	C48 H98 O7 N1 P1 Na1	1.00244e+08	1.23379e+08	7.40848e+07	8.57712e+07	8.71347e+07	1.09021e+08	1.14672e+08	1.07782e+08	8.66896e+07	1.04901e+08	9.72692e+07	9.92336e+07	1.03707e+08	1.05882e+08	1.09718e+08	1.05964e+08	1.0845e+08
PE(43:1)	PE	M+Na	866.661	17.286	C48 H94 O8 N1 P1 Na1	2.08809e+06	2.27475e+06	1.24992e+06	1.53583e+06	4.69597e+06	2.12534e+06	3.12554e+06	1.87547e+06	3.24213e+06	2.78157e+06	2.76173e+06	1.45275e+06	2.19878e+06	2.71631e+06	3.76036e+06	3.01445e+06	2.89968e+06
PE(43:1e)	PE	M+Na	852.682	17.53	C48 H96 O7 N1 P1 Na1	5.9276e+06	6.22089e+06	4.28801e+06	6.82538e+06	4.49497e+06	9.3057e+06	9.15801e+06	1.06761e+07	7.95291e+06	5.98021e+06	6.32792e+06	7.29997e+06	6.21787e+06	6.69583e+06	6.85721e+06	7.03761e+06	7.3206e+06
PE(43:3e)	PE	M+H	826.668	18.796	C48 H93 O7 N1 P1	4.76596e+07	2.11636e+07	1.80816e+07	3.01852e+07	1.07674e+07	4.35983e+07	7.49025e+07	3.60433e+07	3.35433e+07	2.81192e+07	3.33133e+07	2.86749e+07	3.01064e+07	2.78922e+07	2.46223e+07	3.34722e+07	2.53565e+07
PE(43:4e)	PE	M+Na	846.635	16.1689	C48 H90 O7 N1 P1 Na1	1.35864e+07	1.45219e+07	9.26376e+06	1.21475e+07	6.64025e+06	1.53506e+07	2.06412e+07	1.53852e+07	1.64736e+07	1.10353e+07	1.35273e+07	1.31926e+07	1.18566e+07	1.22694e+07	1.20919e+07	1.57129e+07	1.17428e+07
PE(44:0e)	PE	M+Na	868.713	19.361	C49 H100 O7 N1 P1 Na1	8.93774e+08	1.00312e+09	1.22157e+09	2.17342e+09	1.4287e+09	3.70278e+09	3.52692e+09	1.12837e+09	3.65565e+09	2.78474e+09	2.00578e+09	1.9929e+09	2.06723e+09	2.04934e+09	1.84705e+09	1.65798e+09	1.70004e+09
PE(22:5_22:5)	PE	M+H	840.554	11.7281	C49 H79 O8 N1 P1	5.69112e+06	8.90729e+06	1.29113e+07	5.43404e+06	1.96148e+07	5.45574e+06	6.33881e+06	6.39949e+06	6.02825e+06	9.49345e+06	5.06964e+06	8.28708e+06	3.82547e+06	8.76653e+06	6.01286e+06	6.47998e+06	3.76113e+06
PE(44:10)	PE	M+H	840.554	12.134	C49 H79 O8 N1 P1	735008	2.6184e+06	2.47683e+06	2.20541e+06	1.96572e+06	1.6886e+06	2.52959e+06	3.09108e+06	1.08237e+06	1.32678e+06	1.39162e+06	2.37903e+06	1.80004e+06	1.59864e+06	2.10863e+06	1.71016e+06	2.18611e+06
PE(22:5_22:6)	PE	M+H	838.538	11.2553	C49 H77 O8 N1 P1	2.19129e+06	1.75392e+06	1.41945e+06	2.50496e+06	3.08206e+06	9.03389e+06	7.24924e+06	2.59814e+06	2.25384e+06	1.14289e+06	3.99089e+06	3.12703e+06	3.92134e+06	3.99671e+06	4.84458e+06	2.60113e+06	2.41886e+06
PE(44:12)	PE	M+Na	858.504	10.7702	C49 H74 O8 N1 P1 Na1	2.11543e+06	2.61202e+06	2.3052e+06	1.98054e+06	3.59499e+06	7.47347e+06	6.41829e+06	2.65379e+06	1.98033e+06	3.05039e+06	3.43346e+06	2.60251e+06	2.46136e+06	3.44089e+06	2.82499e+06	2.32136e+06	2.66683e+06
PE(44:2)	PE	M+H	856.679	15.824	C49 H95 O8 N1 P1	1.17909e+07	1.03356e+07	1.07507e+07	1.27082e+07	7.10664e+06	1.1817e+07	1.85322e+07	8.99266e+06	1.38573e+07	1.07408e+07	1.03206e+07	1.05581e+07	1.09612e+07	1.13079e+07	1.21266e+07	1.12265e+07	1.02662e+07
PE(24:0_20:3)	PE	M+Na	876.645	17.5747	C49 H92 O8 N1 P1 Na1	4.49148e+06	3.37607e+06	2.5891e+06	4.23948e+06	2.14647e+06	2.78748e+06	4.03538e+06	4.13798e+06	3.25611e+06	1.89977e+06	3.19662e+06	3.66833e+06	3.35723e+06	3.2741e+06	3.18373e+06	2.96961e+06	3.49483e+06
PE(44:3e)	PE	M+H	840.684	18.5109	C49 H95 O7 N1 P1	4.89694e+08	4.48207e+08	3.80274e+08	4.51071e+08	4.30794e+08	5.4616e+08	5.7287e+08	5.05909e+08	4.51579e+08	5.27431e+08	4.60316e+08	5.0481e+08	5.03417e+08	5.1169e+08	5.17144e+08	5.04241e+08	5.12765e+08
PE(24:1_20:3)	PE	M+Na	874.63	16.4441	C49 H90 O8 N1 P1 Na1	3.52345e+06	3.00008e+06	5.85838e+06	7.57804e+06	3.72426e+06	4.46273e+06	3.97504e+06	7.66618e+06	5.90709e+06	1.51886e+06	5.48485e+06	5.63386e+06	2.94137e+06	2.41835e+06	5.64415e+06	5.8099e+06	5.41884e+06
PE(44:4)	PE	M+Na	874.63	17.076	C49 H90 O8 N1 P1 Na1	3.20941e+06	2.91918e+06	2.58587e+06	3.33513e+06	3.3436e+06	4.87524e+06	3.5792e+06	4.93178e+06	3.79412e+06	4.51661e+06	4.03122e+06	3.61352e+06	3.54419e+06	4.60846e+06	4.15749e+06	4.25847e+06	3.66304e+06
PE(24:0_20:4)	PE	M+H	852.648	17.876	C49 H91 O8 N1 P1	1.5277e+07	1.46361e+07	9.63254e+06	1.49705e+07	8.72635e+06	1.07588e+07	1.30463e+07	1.47413e+07	9.98392e+06	6.6143e+06	1.09433e+07	1.08699e+07	1.19714e+07	1.19307e+07	1.0667e+07	1.03521e+07	1.39437e+07
PE(24:1_20:4)	PE	M+H	850.632	16.834	C49 H89 O8 N1 P1	1.52624e+07	1.3813e+07	1.3069e+07	1.60071e+07	1.06379e+07	1.19878e+07	1.4778e+07	1.19972e+07	1.40783e+07	8.16608e+06	1.46199e+07	1.29551e+07	1.1067e+07	1.36159e+07	1.47073e+07	1.39968e+07	1.19875e+07
PE(45:0)	PE	M+Na	896.708	20.635	C50 H100 O8 N1 P1 Na1	1.71813e+07	1.10207e+07	1.28991e+06	1.65817e+06	3.83166e+06	0	1.26247e+06	5.51328e+06	1.57695e+06	1.46775e+06	5.79481e+06	4.51858e+06	3.80228e+06	1.80551e+06	2.58647e+06	7.01763e+06	2.08491e+06
PE(45:3)	PE	M+H	868.679	18.4983	C50 H95 O8 N1 P1	5.50394e+07	5.05576e+07	4.60752e+07	4.91488e+07	4.82251e+07	5.44017e+07	6.02968e+07	5.59895e+07	4.53159e+07	5.35903e+07	5.11046e+07	5.28473e+07	5.14655e+07	5.12444e+07	5.37079e+07	5.40799e+07	5.23761e+07
PE(35:0_10:4)	PE	M+Na	888.645	15.839	C50 H92 O8 N1 P1 Na1	3.75682e+06	3.6158e+06	2.50344e+06	9.68978e+06	6.30089e+06	4.40928e+06	2.74138e+06	9.45231e+06	4.06174e+06	1.67795e+06	3.22386e+06	8.28948e+06	1.00805e+06	3.31385e+06	8.14247e+06	3.03306e+06	6.74479e+06
PE(46:0)	PE	M+Na	910.724	17.387	C51 H102 O8 N1 P1 Na1	1.24796e+07	3.98058e+07	4.42414e+07	2.75785e+07	1.20506e+07	7.38689e+07	3.16591e+06	3.4328e+07	7.68934e+07	6.31542e+07	4.58018e+07	3.98524e+07	5.34924e+06	4.16262e+07	3.84803e+07	1.02789e+07	1.3142e+07
PE(46:1)	PE	M+Na	908.708	18.0275	C51 H100 O8 N1 P1 Na1	4.44398e+06	4.83931e+06	4.13994e+06	5.75068e+06	3.15257e+06	7.04703e+06	1.11483e+07	1.29752e+07	8.61491e+06	4.8498e+06	5.7103e+06	4.6668e+06	5.15788e+06	5.02187e+06	4.90997e+06	4.45685e+06	5.58995e+06
PE(30:1_16:0)	PE	M+H	886.726	19.1426	C51 H101 O8 N1 P1	1.20721e+07	9.54437e+06	1.34273e+07	1.43792e+07	1.11371e+07	4.55056e+06	1.03712e+07	1.12976e+07	1.05483e+07	1.09769e+07	1.02499e+07	9.32893e+06	1.59033e+07	7.06419e+06	7.00026e+06	1.32175e+07	5.18851e+06
PE(47:0)	PE	M+H	902.757	18.211	C52 H105 O8 N1 P1	485689	4.53172e+06	606572	1.90562e+06	3.18284e+06	1.10354e+07	50416.8	2.43971e+06	299752	1.52056e+06	1.36008e+06	1.87931e+06	1.8836e+06	421379	238946	196414	1.87552e+06
PE(47:2)	PE	M+H	898.726	21.0211	C52 H101 O8 N1 P1	1.83108e+07	8.85206e+06	4.44009e+06	7.56569e+06	6.98294e+06	86089.8	0	6.76998e+06	1.79982e+06	2.97694e+06	4.87252e+06	2.22333e+06	1.19211e+06	4.60786e+06	4.50158e+06	5.88597e+06	1.42302e+06
PE(47:4)	PE	M+H	894.695	20.2397	C52 H97 O8 N1 P1	2.83035e+07	1.18768e+07	1.33738e+07	8.99289e+06	1.17865e+07	6.24525e+06	4.36038e+06	1.63915e+07	4.61899e+06	4.83418e+06	4.71979e+06	3.68037e+06	8.36532e+06	1.00492e+07	8.87651e+06	7.87532e+06	6.20794e+06
PE(47:7)	PE	M+H	888.648	19.099	C52 H91 O8 N1 P1	4.86779e+06	4.16008e+06	2.22432e+06	3.09487e+06	5.46026e+06	7.51449e+06	8.9834e+06	4.69982e+06	8.60219e+06	7.08221e+06	7.75763e+06	6.93066e+06	6.28633e+06	7.68025e+06	6.73526e+06	6.78159e+06	7.49003e+06
PE(48:0)	PE	M+Na	938.755	18.913	C53 H106 O8 N1 P1 Na1	269143	3748.05	122160	592634	256661	467913	599622	437552	326472	418008	1.68958e+06	395264	1.59556e+06	440393	821821	607538	249752
PE(48:2)	PE	M+H	912.742	17.803	C53 H103 O8 N1 P1	8.40106e+06	1.14343e+07	1.1297e+07	4.15497e+06	9.49595e+06	1.07333e+07	9.10716e+06	8.74718e+06	1.26245e+07	1.90574e+07	1.0423e+07	1.20366e+07	1.09032e+07	1.28376e+07	8.41774e+06	1.25838e+07	1.30701e+07
PE(48:3)	PE	M+H	910.726	17.989	C53 H101 O8 N1 P1	4.51569e+07	6.39191e+07	9.951e+07	5.72897e+07	5.96848e+07	1.404e+08	9.45108e+07	5.18692e+07	1.49277e+08	9.35548e+07	8.23188e+07	7.94752e+07	1.32122e+08	6.75566e+07	7.58818e+07	6.71072e+07	6.87687e+07
PE(49:0)	PE	M+Na	952.77	21.421	C54 H108 O8 N1 P1 Na1	6.86163e+06	5.67892e+06	3.94772e+06	4.47053e+06	1.94049e+06	4.86859e+06	908440	4.22956e+06	1.18763e+06	5.07803e+06	1.11539e+06	8.08822e+06	2.84218e+06	2.44877e+06	2.23152e+06	4.5771e+06	7.46882e+06
PE(49:3)	PE	M+Na	946.724	20.503	C54 H102 O8 N1 P1 Na1	2.22663e+07	1.70951e+07	1.14348e+07	1.2405e+07	1.59274e+07	5.84368e+06	3.14341e+06	1.97528e+07	2.04922e+06	7.32112e+06	1.33404e+07	8.14922e+06	9.53364e+06	1.15267e+07	1.35081e+07	1.2363e+07	1.10343e+07
PE(49:4)	PE	M+Na	944.708	20.076	C54 H100 O8 N1 P1 Na1	5.5674e+06	7.01959e+06	1.14341e+07	1.01256e+07	5.32784e+06	6.21078e+06	3.01517e+06	4.16759e+06	0	5.30077e+06	1.34522e+07	4.22355e+06	3.32089e+06	1.1426e+07	1.36785e+07	1.25894e+07	9.89674e+06
PE(49:5)	PE	M+H	920.71	20.34	C54 H99 O8 N1 P1	2.41427e+06	3.86199e+06	2.951e+06	1.1957e+06	2.83709e+06	0	0	0	0	0	0	0	1.21713e+06	1.38237e+06	0	1.09561e+06	0
PE(50:3)	PE	M+H	938.757	18.653	C55 H105 O8 N1 P1	5.48925e+07	1.70738e+07	3.5686e+07	5.80257e+07	1.87942e+07	2.14534e+07	2.24244e+07	1.36244e+07	5.14781e+07	9.51552e+07	1.56983e+07	6.49623e+07	1.91011e+07	1.57412e+07	6.50783e+07	1.02074e+08	6.53479e+07
PE(50:4)	PE	M+H	936.742	17.911	C55 H103 O8 N1 P1	2.02737e+07	3.18995e+07	5.96002e+07	3.61616e+07	3.18474e+07	5.6843e+07	5.40759e+07	3.7477e+07	7.15304e+07	6.06067e+07	3.94316e+07	4.34915e+07	4.16586e+07	3.72601e+07	3.94598e+07	4.86321e+07	3.75742e+07
PE(51:4)	PE	M+Na	972.739	20.509	C56 H104 O8 N1 P1 Na1	7.43995e+06	2.87894e+06	563585	2.80922e+06	3.98874e+06	0	0	1.01469e+06	0	0	986047	1.28999e+06	1.04295e+06	1.78243e+06	0	0	0
PE(51:5)	PE	M+Na	970.724	20.397	C56 H102 O8 N1 P1 Na1	1.9371e+06	1.00274e+06	867245	0	0	0	0	995265	0	0	1.04561e+06	0	0	0	0	0	0
PE(51:7)	PE	M+H	944.71	20.125	C56 H99 O8 N1 P1	5.5674e+06	7.01959e+06	1.14341e+07	1.01256e+07	5.32784e+06	6.21078e+06	1.51862e+06	1.40925e+07	0	5.09726e+06	1.34522e+07	4.22355e+06	3.32089e+06	1.1426e+07	1.36785e+07	1.25894e+07	9.89674e+06
PE(60:1)	PE	M+H	1082.95	21.9936	C65 H129 O8 N1 P1	1.40758e+07	2.18272e+07	1.6647e+07	1.39835e+07	6.10229e+06	1.36214e+07	2.07373e+07	1.63513e+07	1.50351e+07	1.20023e+07	4.67835e+06	1.37946e+07	1.43278e+07	1.24072e+07	1.33281e+07	1.22954e+07	1.22725e+07
PE(60:2)	PE	M+H	1080.93	21.7258	C65 H127 O8 N1 P1	1.55388e+07	2.1953e+07	1.48327e+07	1.15255e+07	5.71001e+06	2.88554e+07	2.7423e+07	1.83755e+07	2.54633e+07	1.8565e+07	1.58699e+07	1.70373e+07	1.73003e+07	1.81306e+07	1.59382e+07	1.6094e+07	1.68723e+07
PE(62:1)	PE	M+H	1110.98	21.923	C67 H133 O8 N1 P1	9.87651e+06	1.16979e+07	1.59699e+07	1.30433e+07	9.55124e+06	2.25246e+07	1.3673e+07	2.28021e+07	1.73326e+07	1.50935e+07	1.09828e+07	1.55345e+07	1.52136e+07	1.4785e+07	1.34717e+07	1.43102e+07	1.49936e+07
PE(62:2)	PE	M+H	1108.96	21.662	C67 H131 O8 N1 P1	4.38886e+06	10075365	6.89409e+06	4.98107e+06	5.54482e+06	9.25647e+06	7.8247e+06	6.28244e+06	5.78918e+06	7.22062e+06	4.88195e+06	5.77179e+06	4.68409e+06	5.28772e+06	7.44484e+06	6.16762e+06	6.66333e+06
PEt(26:0e)	PEt	M+H	579.438	10.5752	C31 H64 O7 N0 P1	1.39826e+07	1.40097e+07	1.12929e+07	1.06809e+07	7.97277e+06	9.16466e+06	1.1667e+07	8.98876e+06	1.11106e+07	9.39395e+06	1.06504e+07	8.57248e+06	8.60107e+06	1.00272e+07	1.04874e+07	1.02246e+07	1.01378e+07
PEt(16:0_17:0)	PEt	M+H	691.527	5.51571	C38 H76 O8 N0 P1	8.79252e+07	8.41502e+07	7.55652e+07	9.27983e+07	9.35744e+07	1.34435e+08	1.49067e+08	9.82895e+07	1.19061e+08	1.15361e+08	1.28782e+08	1.21423e+08	1.2495e+08	1.22715e+08	1.09754e+08	1.2396e+08	1.21092e+08
PEt(17:0_18:1)	PEt	M+H	717.543	5.47911	C40 H78 O8 N0 P1	9.85891e+06	5.2158e+06	2.38976e+07	3.6055e+07	5.73825e+07	4.53503e+07	2.05061e+07	1.73427e+07	3.00226e+07	1.68447e+07	2.00037e+07	1.8961e+07	1.95207e+07	2.02337e+07	1.80948e+07	1.97237e+07	1.90758e+07
PEt(19:1_18:1)	PEt	M+H	743.559	5.456	C42 H80 O8 N0 P1	92623	0	1.09645e+06	2.82414e+06	7.6368e+06	3.01688e+06	443622	389128	1.47798e+06	251956	543741	486423	582769	617805	468996	559915	553039
PG(28:3e)	PG	M+NH4	664.455	5.767	C34 H67 O9 N1 P1	2.27633e+06	2.67921e+06	2.05954e+06	2.60156e+06	1.52514e+06	2.79212e+06	3.04597e+06	2.67156e+06	3.56157e+06	2.68148e+06	2.47538e+06	2.59515e+06	2.67822e+06	2.44065e+06	1.94378e+06	2.19435e+06	2.44926e+06
PG(34:0)	PG	M+NH4	768.575	14.902	C40 H83 O10 N1 P1	1.17208e+08	9.42382e+07	1.1583e+08	1.32668e+08	9.87916e+07	1.24874e+08	1.40503e+08	1.17511e+08	1.19399e+08	9.8429e+07	9.15247e+07	9.46636e+07	1.01524e+08	1.07245e+08	1.05368e+08	1.07794e+08	1.11176e+08
PG(34:1)	PG	M+NH4	766.559	13.851	C40 H81 O10 N1 P1	2.66956e+07	2.54243e+07	2.35969e+07	1.85951e+07	1.50366e+07	1.53114e+07	2.59059e+07	2.45622e+07	2.0341e+07	2.18023e+07	1.96038e+07	2.25094e+07	2.2316e+07	2.26524e+07	2.19404e+07	2.22397e+07	2.20905e+07
PG(34:3)	PG	M+Na	767.483	10.7338	C40 H73 O10 N0 P1 Na1	840721	1.95304e+06	976179	1.3607e+06	1.12904e+06	2.87446e+06	2.31896e+06	1.87986e+06	1.83602e+06	1.17248e+06	1.81074e+06	1.46636e+06	1.76917e+06	1.56352e+06	1.60304e+06	1.29532e+06	1.60982e+06
PG(34:6)	PG	M+NH4	756.481	7.87506	C40 H71 O10 N1 P1	4.39802e+06	4.79348e+06	3.79273e+06	4.53997e+06	2.38437e+06	6.95442e+06	6.9087e+06	4.6598e+06	8.3512e+06	5.02124e+06	4.98383e+06	4.7565e+06	4.52961e+06	4.80422e+06	4.13892e+06	4.51092e+06	4.66313e+06
PG(35:0)	PG	M+H	765.564	11.644	C41 H82 O10 N0 P1	180477	1.53047e+06	538.917	1.1233e+06	38427.5	0	903135	0	2.2179e+06	27068.9	0	45556.4	207279	154973	0	850.307	81093.1
PG(20:0_16:0)	PG	M+H	779.58	17.948	C42 H84 O10 N0 P1	88685.1	135778	0.172	0	0.209	0	0.373	5.17014e+06	0	0.128	0.089	537881	757000	467604	918569	392629	290920
PG(18:0_18:2)	PG	M+H	775.548	13.5038	C42 H80 O10 N0 P1	5.63933e+07	6.76519e+07	7.65977e+07	7.86256e+07	7.07354e+07	8.89379e+07	1.31389e+08	6.22648e+07	7.65905e+07	6.36468e+07	7.7862e+07	7.77838e+07	7.76339e+07	8.13502e+07	7.27614e+07	7.57679e+07	7.51442e+07
PG(36:4)	PG	M+Na	793.499	11.005	C42 H75 O10 N0 P1 Na1	1.92451e+07	1.85424e+07	1.23952e+07	1.53996e+07	1.4577e+07	2.84322e+07	2.99216e+07	1.97451e+07	1.4832e+07	1.56967e+07	1.68157e+07	1.79589e+07	1.6573e+07	1.60898e+07	1.66e+07	1.62936e+07	1.72161e+07
PG(36:5)	PG	M+NH4	786.528	10.0176	C42 H77 O10 N1 P1	2.23963e+06	3.29591e+06	2.08149e+06	2.90989e+06	1.96814e+06	4.06981e+06	4.16032e+06	3.23551e+06	1.60914e+06	2.00798e+06	2.35642e+06	1.4207e+06	2.98916e+06	2.52047e+06	2.53233e+06	2.40903e+06	2.528e+06
PG(37:1)	PG	M+H	791.58	13.5612	C43 H84 O10 N0 P1	3.52827e+07	3.21578e+07	3.58661e+07	2.86805e+07	3.16925e+07	2.21372e+07	3.82724e+07	2.49934e+07	2.68545e+07	31138598	3.10373e+07	3.10128e+07	3.15811e+07	3.22336e+07	2.92926e+07	3.15242e+07	3.21738e+07
PG(38:1)	PG	M+NH4	822.622	17.086	C44 H89 O10 N1 P1	1.47797e+07	1.28705e+07	7.77953e+06	8.79596e+06	7.70168e+06	1.58664e+07	1.24437e+07	2.58566e+07	1.22544e+07	1.38508e+07	1.43772e+07	1.49235e+07	1.49886e+07	1.48763e+07	1.25825e+07	1.1318e+07	1.37548e+07
PG(38:4)	PG	M+NH4	816.575	9.725	C44 H83 O10 N1 P1	1.16101e+07	4.0945e+07	3.11292e+07	1.32853e+07	1.31839e+07	25693824	2.37378e+07	1.08019e+07	3.37899e+07	2.52509e+07	2.34657e+07	2.38008e+07	7.92981e+06	2.37783e+07	8.57323e+06	2.396e+07	9.01438e+06
PG(20:5_18:2)	PG	M+Na	815.483	10.077	C44 H73 O10 N0 P1 Na1	3.09779e+06	2.45202e+06	1.79285e+06	2.02495e+06	1.38115e+06	3.37479e+06	5.24001e+06	2.21822e+06	3.71504e+06	2.57098e+06	2.44777e+06	2.13961e+06	2.30489e+06	2.20746e+06	2.19115e+06	2.27911e+06	1.97882e+06
PG(40:1)	PG	M+NH4	850.653	18.007	C46 H93 O10 N1 P1	5.33843e+06	4.02725e+06	3.95028e+06	5.4103e+06	3.70906e+06	4.676e+06	5.32445e+06	9.73237e+06	1.98458e+06	4.18989e+06	4.82932e+06	5.29374e+06	5.12e+06	4.73704e+06	5.03379e+06	5.08716e+06	4.48777e+06
PG(40:2)	PG	M+NH4	848.638	16.9599	C46 H91 O10 N1 P1	7.1075e+06	6.3997e+06	4.0618e+06	7.31262e+06	5.04093e+06	8.46534e+06	1.23755e+07	1.17553e+07	5.46852e+06	6.65778e+06	7.1999e+06	6.5861e+06	6.4545e+06	6.48258e+06	6.33266e+06	6.46313e+06	6.25958e+06
PG(22:5_18:2)	PG	M+NH4	838.559	9.634	C46 H81 O10 N1 P1	5.61913e+07	9.12996e+07	7.04206e+07	6.02802e+07	2.65694e+07	6.84084e+07	8.72355e+07	6.68216e+07	7.90244e+07	5.36386e+07	5.65129e+07	5.25252e+07	5.66895e+07	5.10835e+07	5.39501e+07	5.29316e+07	5.56562e+07
PG(40:7)	PG	M+NH4	838.559	9.914	C46 H81 O10 N1 P1	2.92272e+06	3.71186e+06	1.80593e+06	2.79932e+06	1.67041e+06	7.18549e+06	1.04203e+07	4.96028e+06	7.51625e+06	2.91104e+06	3.67611e+06	3.31213e+06	4.47767e+06	4.29926e+06	3.14226e+06	4.6887e+06	5.26409e+06
PG(18:1_22:6)	PG	M+H	821.533	10.5313	C46 H78 O10 N0 P1	3.35e+07	4.27567e+07	3.24167e+07	4.5102e+07	2.14505e+07	5.37199e+07	5.18545e+07	3.73267e+07	6.18416e+07	4.37006e+07	3.74134e+07	3.72375e+07	3.66123e+07	3.68714e+07	3.87677e+07	3.59576e+07	3.76462e+07
PG(18:2_22:6)	PG	M+NH4	836.544	9.50668	C46 H79 O10 N1 P1	9.00421e+07	1.01889e+08	7.27544e+07	8.51981e+07	5.82306e+07	1.78424e+08	1.88805e+08	1.01171e+08	1.88481e+08	1.11861e+08	1.01109e+08	1.01144e+08	1.00527e+08	9.72988e+07	9.4864e+07	9.7557e+07	1.00236e+08
PG(18:3_22:6)	PG	M+NH4	834.528	8.65982	C46 H77 O10 N1 P1	9.04581e+06	9.53101e+06	6.77721e+06	9.81681e+06	6.63831e+06	2.41672e+07	2.30384e+07	9.22422e+06	2.04549e+07	1.1537e+07	9.87943e+06	1.02181e+07	9.3349e+06	9.62892e+06	9.36646e+06	9.68637e+06	9.83074e+06
PG(42:0)	PG	M+H	863.674	18.16	C48 H96 O10 N0 P1	2.46466e+06	2.95883e+06	2.11834e+06	2.28706e+06	3.59789e+06	4.16715e+07	4.3757e+07	4.46601e+06	4.01051e+07	5.27755e+06	1.25174e+07	8.07738e+06	6.23937e+06	8.83389e+06	1.10746e+07	1.03297e+07	8.11392e+06
PG(22:5_20:4)	PG	M+NH4	862.559	9.83995	C48 H81 O10 N1 P1	8.50283e+06	9.10752e+06	7.21081e+06	7.27904e+06	7.09053e+06	7.67506e+06	9.67049e+06	9.11534e+06	1.18146e+07	4.95759e+06	6.42587e+06	7.57532e+06	7.6491e+06	6.41306e+06	6.74936e+06	7.54099e+06	7.63052e+06
PG(43:0)	PG	M+H	877.689	18.5165	C49 H98 O10 N0 P1	7.44574e+06	9.83353e+06	7.6864e+06	7.48887e+06	6.81424e+06	1.37272e+07	1.48465e+07	8.76961e+06	1.44422e+07	1.282e+07	8.75747e+06	1.11924e+07	1.04694e+07	9.68053e+06	1.02795e+07	9.68682e+06	1.10515e+07
PG(28:0_16:0)	PG	M+H	891.705	17.5366	C50 H100 O10 N0 P1	1.33267e+07	1.95477e+07	2.48664e+07	1.79506e+07	1.81488e+07	3.73975e+07	1.7444e+07	1.6948e+07	4.62104e+07	3.52414e+07	1.59137e+07	1.61444e+07	2.37173e+07	2.33278e+07	2.43987e+07	2.39172e+07	2.46261e+07
PG(44:0)	PG	M+NH4	908.731	18.957	C50 H103 O10 N1 P1	3.23784e+06	7.33494e+06	4.13873e+06	4.00108e+06	5.07693e+06	1.27129e+07	1.26276e+07	1.0917e+07	1.11891e+07	9.57665e+06	8.64391e+06	8.34629e+06	9.63149e+06	9.57186e+06	8.83787e+06	8.88831e+06	8.53724e+06
PG(28:0_16:1)	PG	M+H	889.689	17.648	C50 H98 O10 N0 P1	3.07465e+06	3.95877e+06	5.73442e+06	2.64192e+06	2.73302e+06	1.30777e+06	7.8166e+06	3.90712e+06	6.89615e+06	8.29275e+06	6.77954e+06	6.63349e+06	5.42765e+06	6.17451e+06	5.70986e+06	6.09067e+06	7.30893e+06
PG(22:5_22:6)	PG	M+NH4	886.559	9.82877	C50 H81 O10 N1 P1	2.29292e+07	2.921e+07	2.1739e+07	3.01217e+07	1.62641e+07	2.08176e+07	2.58178e+07	3.14489e+07	2.41082e+07	1.92329e+07	2.15241e+07	2.1819e+07	2.08962e+07	2.17397e+07	2.13062e+07	2.14417e+07	2.1137e+07
PG(22:6_22:6)	PG	M+H	867.517	8.97901	C50 H76 O10 N0 P1	2.72386e+07	3.01461e+07	2.0856e+07	2.11891e+07	1.3878e+07	3.25672e+07	3.23319e+07	3.62574e+07	3.64324e+07	1.88676e+07	2.41803e+07	2.36876e+07	2.26676e+07	2.30795e+07	2.23426e+07	2.31401e+07	2.31042e+07
PG(45:0)	PG	M+Na	927.702	18.567	C51 H101 O10 N0 P1 Na1	7.99745e+06	1.00057e+07	2.12199e+07	9.11873e+06	7.45403e+06	7.91204e+06	6.00512e+06	2.84306e+06	1.87891e+07	1.4719e+07	1.35305e+07	1.0663e+07	1.17442e+07	5.30647e+06	4.89755e+06	1.28152e+07	1.08776e+07
PG(45:1)	PG	M+Na	925.687	17.9926	C51 H99 O10 N0 P1 Na1	9.36454e+06	1.31216e+07	2.06041e+07	1.00787e+07	9.48199e+06	2.79624e+07	2.47991e+07	9.24481e+06	3.49922e+07	2.39061e+07	1.8048e+07	1.74519e+07	1.73929e+07	1.66075e+07	1.70574e+07	1.79495e+07	1.61562e+07
PG(45:2)	PG	M+Na	923.671	17.212	C51 H97 O10 N0 P1 Na1	1.12818e+06	1.55841e+06	2.86549e+06	1.10198e+06	1.75162e+06	6.40758e+06	2.1939e+06	1.4882e+06	1.05987e+07	4.26072e+06	1.75013e+06	1.55077e+06	3.69684e+06	2.15118e+06	1.43905e+06	1.3494e+06	2.87356e+06
PG(30:0_16:0)	PG	M+NH4	936.763	17.5819	C52 H107 O10 N1 P1	2.0032e+07	1.89761e+07	1.78238e+07	1.60258e+07	1.49529e+07	6.29546e+07	6.4467e+07	2.74087e+07	8.11523e+07	1.47059e+07	2.35074e+07	2.49712e+07	3.52885e+07	1.98418e+07	2.2738e+07	2.37747e+07	1.89552e+07
PG(46:0)	PG	M+H	919.736	18.0075	C52 H104 O10 N0 P1	3.41575e+07	5.58535e+07	9.18905e+07	6.98771e+07	6.74693e+07	5.6941e+07	5.86857e+07	4.40185e+07	7.22972e+07	4.81939e+07	4.56671e+07	4.86959e+07	4.86445e+07	4.7987e+07	5.32081e+07	5.60937e+07	5.4339e+07
PG(28:0_18:0)	PG	M+NH4	936.763	19.0752	C52 H107 O10 N1 P1	1.31281e+07	3.30386e+06	1.94221e+06	5.54694e+06	8.66415e+06	5.43135e+07	7.40607e+07	1.82848e+07	5.59862e+07	3.88653e+07	2.97101e+07	1.69781e+07	2.86164e+07	2.37573e+07	2.05812e+07	2.35446e+07	1.17214e+07
PG(30:1_16:0)	PG	M+H	917.721	18.3754	C52 H102 O10 N0 P1	2.04707e+07	1.36991e+07	2.9204e+07	2.46665e+07	3.47617e+07	2.04981e+07	2.77414e+07	2.60925e+07	3.9442e+07	2.05502e+07	1.70471e+07	3.41404e+07	2.48607e+07	3.91632e+07	3.28142e+07	3.75698e+07	2.65945e+07
PG(28:0_18:1)	PG	M+H	917.721	18.732	C52 H102 O10 N0 P1	6.78308e+07	5.63626e+07	3.97994e+07	4.30826e+07	8.02163e+07	4.20095e+08	4.20308e+08	8.44545e+07	3.0822e+08	1.85192e+08	1.44801e+08	1.52139e+08	1.49647e+08	1.50323e+08	1.46393e+08	1.47301e+08	1.35652e+08
PG(46:1)	PG	M+NH4	934.747	19.207	C52 H105 O10 N1 P1	6.22045e+06	4.7736e+06	1.10711e+06	2.46589e+06	4.51803e+06	1.86174e+07	2.08825e+07	1.45377e+07	2.03915e+07	1.78218e+07	1.07059e+07	9.91848e+06	8.68833e+06	1.31225e+07	7.4807e+06	9.54704e+06	1.01584e+07
PG(28:0_18:2)	PG	M+H	915.705	17.6239	C52 H100 O10 N0 P1	5.11829e+06	6.85385e+06	7.6203e+06	6.34087e+06	7.1042e+06	8.70497e+06	8.71464e+06	7.17622e+06	1.49378e+07	9.41816e+06	5.52752e+06	8.46682e+06	9.00042e+06	8.56331e+06	6.81022e+06	8.51876e+06	7.37775e+06
PG(47:2)	PG	M+Na	951.702	17.978	C53 H101 O10 N0 P1 Na1	2.49191e+06	5.6397e+06	1.18603e+07	5.82475e+06	5.59429e+06	7.118e+06	8.38622e+06	2.42353e+06	9.26001e+06	5.23261e+06	6.17492e+06	6.05811e+06	4.17649e+06	6.32498e+06	5.97988e+06	6.55298e+06	6.75143e+06
PG(47:3)	PG	M+H	927.705	18.513	C53 H100 O10 N0 P1	7.02845e+06	9.77339e+06	2.14797e+07	9.18016e+06	7.59555e+06	1.79296e+07	1.36e+07	7.38889e+06	2.26148e+07	1.48757e+07	1.29635e+07	1.24485e+07	1.1016e+07	1.23945e+07	1.02439e+07	1.28776e+07	1.26306e+07
PG(48:0)	PG	M+NH4	964.794	18.0154	C54 H111 O10 N1 P1	1.29816e+07	1.38809e+07	1.26109e+07	1.0977e+07	8.74049e+06	9.821e+06	2.1004e+07	2.55817e+07	2.55378e+07	2.24904e+07	1.90536e+07	1.39822e+07	1.42552e+07	1.43114e+07	1.40439e+07	1.55856e+07	1.51761e+07
PG(30:1_18:0)	PG	M+NH4	962.778	18.004	C54 H109 O10 N1 P1	1.02997e+07	1.25215e+07	1.04237e+07	9.56614e+06	5.80803e+06	3.19129e+07	2.52189e+07	1.73584e+07	2.71026e+07	2.18646e+07	1.29027e+07	8.95571e+06	1.45762e+07	1.38747e+07	1.09548e+07	1.28885e+07	1.22991e+07
PG(48:1)	PG	M+NH4	962.778	18.285	C54 H109 O10 N1 P1	1.24798e+07	1.49369e+07	2.96765e+06	1.06601e+07	4.71916e+06	6.46858e+06	1.1573e+07	2.02242e+07	1.37143e+07	1.5978e+07	1.13372e+06	1.2664e+07	2.1969e+07	1.55082e+07	1.48848e+07	1.98932e+07	1.61236e+07
PG(30:0_18:2)	PG	M+H	943.736	17.9564	C54 H104 O10 N0 P1	1.0105e+07	1.02202e+07	7.13977e+06	7.99894e+06	5.72022e+06	2.84255e+07	1.61591e+07	1.65597e+07	1.32993e+07	1.63015e+07	1.24758e+07	1.22455e+07	1.04553e+07	1.43308e+07	1.15147e+07	1.09614e+07	1.33383e+07
PG(30:1_18:1)	PG	M+H	943.736	18.5698	C54 H104 O10 N0 P1	6.22081e+06	4.99401e+06	3.87542e+06	3.18167e+06	1.03928e+07	1.96857e+07	1.39366e+07	7.19499e+06	1.80247e+07	1.92675e+07	7.45529e+06	3.51321e+07	7.31618e+06	1.04765e+07	8.83998e+06	3.36633e+07	3.27006e+07
PG(30:1_18:2)	PG	M+H	941.721	18.5743	C54 H102 O10 N0 P1	3.1873e+07	3.51397e+07	3.71727e+07	2.92494e+07	4.64439e+07	1.59588e+08	1.47033e+08	4.91837e+07	1.29265e+08	6.47686e+07	6.51741e+07	7.58515e+07	6.06753e+07	6.00786e+07	5.91475e+07	5.97389e+07	6.04235e+07
PG(49:0)	PG	M+Na	983.765	18.9617	C55 H109 O10 N0 P1 Na1	6.8736e+06	4.97856e+06	4.16619e+06	5.09162e+06	3.88336e+06	8.4494e+06	1.23842e+07	6.39707e+06	7.33969e+06	6.32112e+06	7.43881e+06	6.70919e+06	6.84546e+06	7.69995e+06	6.25338e+06	6.72754e+06	8.50035e+06
PG(52:2)	PG	M+H	999.799	20.067	C58 H112 O10 N0 P1	7.63365e+07	7.34919e+07	6.93394e+07	8.53264e+07	7.98072e+07	1.04576e+08	1.20771e+08	1.23755e+08	9.73151e+07	1.25074e+08	9.38133e+07	9.94042e+07	9.69659e+07	1.20321e+08	9.79152e+07	1.12734e+08	9.39239e+07
PG(54:1)	PG	M+Na	1051.83	19.08	C60 H117 O10 N0 P1 Na1	1.70746e+06	1.90737e+06	1.12002e+06	2.14078e+06	1.63496e+06	5.11523e+06	3.23899e+06	2.38828e+06	2.89048e+06	1.89498e+06	2.32011e+06	2.72997e+06	2.22223e+06	2.96628e+06	2.00608e+06	2.63171e+06	2.36486e+06
PI(28:0)	PI	M+NH4	772.497	10.505	C37 H75 O13 N1 P1	3.56192e+06	6.51928e+06	4.37511e+06	3.96433e+06	637366	2.86897e+06	2.22163e+06	3.10705e+06	5.73354e+06	2.49367e+06	2.89102e+06	2.99592e+06	2.91593e+06	2.34315e+06	2.87346e+06	2.55936e+06	3.16646e+06
PI(30:2)	PI	M+NH4	796.497	10.5838	C39 H75 O13 N1 P1	6.15052e+06	1.09939e+07	6.38876e+06	6.16398e+06	2.64875e+06	4.65091e+06	8.60082e+06	6.76966e+06	9.47263e+06	5.81296e+06	6.10642e+06	6.17163e+06	7.09529e+06	6.28178e+06	5.83061e+06	6.71061e+06	6.96398e+06
PI(31:0)	PI	M+NH4	814.544	11.4913	C40 H81 O13 N1 P1	6.75691e+07	6.2231e+07	5.90643e+07	6.70768e+07	5.10268e+07	4.67345e+07	6.93762e+07	4.74719e+07	5.57403e+07	6.15902e+07	5.61318e+07	5.40504e+07	6.73243e+07	6.45149e+07	5.93968e+07	5.71876e+07	5.82243e+07
PI(31:1)	PI	M+NH4	812.528	11.378	C40 H79 O13 N1 P1	7.16468e+06	3.14753e+07	1.21451e+08	1.09629e+07	1.21848e+07	1.76807e+07	2.44527e+08	1.68984e+07	1.60801e+08	1.62478e+08	1.59542e+08	1.69529e+08	1.43619e+07	1.33195e+07	1.36509e+07	1.86812e+08	1.77372e+07
PI(36:0)	PI	M+Na	889.578	11.587	C45 H87 O13 N0 P1 Na1	9.63048e+06	1.06323e+07	5.7582e+06	9.68756e+06	7.30789e+06	1.74957e+07	1.74871e+07	1.04048e+07	1.39685e+07	1.38645e+07	1.24807e+07	9.3038e+06	6.79191e+06	9.64351e+06	8.37746e+06	6.83547e+06	7.87312e+06
PI(18:0_18:0)	PI	M+Na	889.578	13.5008	C45 H87 O13 N0 P1 Na1	1.00873e+07	8.30355e+06	9.49656e+06	6.75559e+06	9.74765e+06	8.50772e+06	5.63109e+06	1.24561e+07	6.50111e+06	1.07303e+07	1.56947e+07	1.44529e+07	1.7165e+07	1.78521e+07	1.53747e+07	1.41937e+07	1.53682e+07
PI(18:0_18:1)	PI	M+Na	887.562	12.9244	C45 H85 O13 N0 P1 Na1	3.75198e+07	4.47101e+07	4.36819e+07	2.73887e+07	6.81066e+07	2.0656e+07	1.20087e+07	3.35806e+07	8.81207e+06	4.48223e+07	6.73821e+07	5.86251e+07	6.4585e+07	5.93572e+07	6.28827e+07	7.23957e+07	5.79838e+07
PI(18:1_18:1)	PI	M+Na	885.546	11.595	C45 H83 O13 N0 P1 Na1	1.44748e+07	1.65533e+07	1.61266e+07	6.91541e+06	1.36066e+07	2.66473e+06	2.42177e+06	1.76067e+07	0	7.91206e+06	1.65676e+07	1.97107e+07	2.08964e+07	1.80965e+07	1.58575e+07	2.25779e+07	1.76476e+07
PI(36:3)	PI	M+NH4	878.575	13.0394	C45 H85 O13 N1 P1	7.70084e+07	5.94551e+07	5.52138e+07	4.8085e+07	8.82898e+07	7.47687e+07	7.16195e+07	5.87957e+07	6.99389e+07	9.4927e+07	7.61836e+07	7.80709e+07	7.92664e+07	7.06232e+07	7.18737e+07	7.12186e+07	7.55e+07
PI(37:3)	PI	M+NH4	892.591	13.678	C46 H87 O13 N1 P1	215467	254620	0	0	840324	980525	0	0	0	1.31325e+06	295042	0	196098	815439	1.22873e+06	1.33442e+06	348187
PI(38:1)	PI	M+H	893.611	13.345	C47 H90 O13 N0 P1	2.19826e+06	1.56755e+06	4.12065e+06	1.49705e+06	3.7872e+06	7.15892e+06	7.186e+06	0	3.09521e+06	7.64262e+06	2.66903e+06	3.49929e+06	4.87324e+06	3.48076e+06	3.78626e+06	2.472e+06	0
PI(38:2)	PI	M+NH4	908.622	15.3986	C47 H91 O13 N1 P1	1.38211e+07	6.06834e+06	1.32243e+07	2.07664e+07	2.33347e+07	2.41515e+07	2.56388e+07	2.08537e+07	1.91667e+07	2.70479e+07	2.13751e+07	2.05492e+07	2.18279e+07	2.21458e+07	1.72475e+07	1.94828e+07	2.02367e+07
PI(18:0_20:3)	PI	M+NH4	906.607	13.5028	C47 H89 O13 N1 P1	4.36732e+07	4.38208e+07	3.32518e+07	3.44556e+07	4.0568e+07	3.92193e+07	3.46974e+07	4.62403e+07	3.34342e+07	4.69241e+07	6.51141e+07	6.29266e+07	6.29746e+07	6.24636e+07	6.48446e+07	6.29751e+07	6.60394e+07
PI(38:3)	PI	M+NH4	906.607	14.2318	C47 H89 O13 N1 P1	8.30462e+06	8.38763e+06	8.78281e+06	7.68883e+06	1.65068e+07	6.65525e+06	1.04759e+07	1.51661e+07	7.92207e+06	2.16244e+07	1.16504e+07	1.68369e+07	1.48181e+07	1.21433e+07	1.92799e+07	2.09572e+07	9.87472e+07
PI(18:0_20:4)	PI	M+NH4	904.591	12.936	C47 H87 O13 N1 P1	2.08349e+08	2.45285e+08	2.43649e+08	1.62046e+08	3.30371e+08	1.80107e+08	1.2782e+08	2.1965e+08	1.59162e+08	1.74704e+08	2.99219e+08	3.5766e+08	3.11656e+08	3.04272e+08	3.41114e+08	3.19755e+08	2.82993e+08
PI(38:4)	PI	M+H	887.564	12.936	C47 H84 O13 N0 P1	3.75198e+07	4.47101e+07	4.36819e+07	2.73887e+07	6.81066e+07	2.0656e+07	1.20087e+07	3.35806e+07	8.81207e+06	4.48223e+07	6.73821e+07	5.86251e+07	6.4585e+07	5.93572e+07	6.28827e+07	7.23957e+07	5.79838e+07
PI(38:5)	PI	M+NH4	902.575	12.7831	C47 H85 O13 N1 P1	1.45317e+08	1.30194e+08	1.17416e+08	1.20611e+08	1.93666e+08	2.20775e+08	1.85193e+08	1.55412e+08	1.86543e+08	2.42878e+08	1.75485e+08	1.72415e+08	1.73345e+08	1.63529e+08	1.66127e+08	1.80685e+08	1.80483e+08
PI(16:0_22:6)	PI	M+NH4	900.56	11.2228	C47 H83 O13 N1 P1	1.61117e+07	2.36934e+07	2.01925e+07	2.27151e+07	2.71143e+07	4.29412e+07	2.73153e+07	2.94634e+07	4.83001e+07	4.18264e+07	3.10214e+07	2.77241e+07	2.96004e+07	2.63676e+07	3.10324e+07	2.97256e+07	2.91931e+07
PI(38:6)	PI	M+NH4	900.56	11.7013	C47 H83 O13 N1 P1	1.47915e+07	1.16583e+07	6.44011e+06	1.17656e+07	1.61713e+07	3.12025e+07	1.85903e+07	1.67828e+07	2.34117e+07	2.13035e+07	1.93138e+07	1.6158e+07	1.58173e+07	1.83008e+07	1.7119e+07	1.74732e+07	1.89437e+07
PI(38:6e)	PI	M+NH4	886.58	13.351	C47 H85 O12 N1 P1	1.28579e+07	1.36122e+07	2.02559e+07	2.00716e+07	2.98767e+07	2.30559e+07	3.32685e+07	1.51914e+07	2.06432e+07	3.1518e+07	2.10649e+07	2.02865e+07	2.20572e+07	2.06345e+07	1.95149e+07	2.36058e+07	2.09734e+07
PI(39:5)	PI	M+NH4	916.591	13.4355	C48 H87 O13 N1 P1	1.11465e+07	1.00474e+07	7.86682e+06	7.59314e+06	1.36408e+07	1.44314e+07	1.33212e+07	8.38499e+06	9.41557e+06	1.9132e+07	1.22101e+07	1.06582e+07	1.18761e+07	9.45521e+06	1.31119e+07	1.24085e+07	1.40169e+07
PI(39:7)	PI	M+NH4	912.56	11.5165	C48 H83 O13 N1 P1	2.68477e+06	1.3005e+06	1.20871e+06	3.95965e+06	3.68324e+06	1.84724e+06	1.65588e+06	485981	2.7762e+06	3.31176e+06	1.9245e+06	2.32284e+06	3.0182e+06	2.17595e+06	2.28039e+06	2.52059e+06	3.33097e+06
PI(40:0)	PI	M+NH4	940.685	19.2495	C49 H99 O13 N1 P1	1.4993e+07	1.05638e+07	7.50648e+06	8.45614e+06	1.47707e+07	2.46501e+07	1.89349e+07	1.09861e+07	1.24361e+07	1.42343e+07	1.33108e+07	1.34412e+07	1.38458e+07	1.30034e+07	1.44397e+07	1.42469e+07	1.34552e+07
PI(40:1)	PI	M+NH4	938.669	18.7996	C49 H97 O13 N1 P1	8.94929e+06	5.89301e+06	2.41045e+06	2.91392e+06	8.52701e+06	1.78097e+07	1.47446e+07	6.49375e+06	5.25618e+06	6.08338e+06	9.46909e+06	1.01933e+07	8.80854e+06	1.09319e+07	9.7344e+06	1.02199e+07	1.08703e+07
PI(20:1_20:1)	PI	M+NH4	936.654	16.5413	C49 H95 O13 N1 P1	1.39712e+06	1.10172e+06	1.70854e+06	2.10971e+06	2.35838e+06	3.17472e+06	2.54581e+06	2.30095e+06	2.17218e+06	4.64005e+06	2.17271e+06	3.464e+06	2.60247e+06	2.65627e+06	2923033	2.16862e+06	2.62692e+06
PI(40:3)	PI	M+NH4	934.638	15.639	C49 H93 O13 N1 P1	5.77269e+06	3.19736e+06	1.56304e+06	3.90104e+06	5.29851e+06	2.96444e+06	2.71479e+06	3.57626e+06	5.15217e+06	6.8577e+06	4.5258e+06	5.46893e+06	4.77737e+06	5.57219e+06	4.94413e+06	5.27989e+06	5.67227e+06
PI(40:4)	PI	M+NH4	932.622	14.6813	C49 H91 O13 N1 P1	2.45002e+07	2.17964e+07	3.79514e+07	2.84521e+07	3.58385e+07	3.34167e+07	3.70448e+07	3.1163e+07	3.29613e+07	4.16491e+07	3.42407e+07	3.37532e+07	3.53082e+07	3.28783e+07	3.40159e+07	3.21724e+07	3.3285e+07
PI(40:5)	PI	M+NH4	930.607	14.1652	C49 H89 O13 N1 P1	3.07212e+08	2.71154e+08	2.43028e+08	2.30883e+08	4.0672e+08	4.29522e+08	3.74857e+08	2.74371e+08	3.69442e+08	5.35498e+08	3.51585e+08	3.59326e+08	3.40638e+08	3.57106e+08	3.48465e+08	3.4397e+08	3.53205e+08
PI(18:0_22:6)	PI	M+NH4	928.591	12.7646	C49 H87 O13 N1 P1	1.87543e+08	1.89202e+08	1.78718e+08	1.93126e+08	2.4827e+08	2.96733e+08	2.22718e+08	2.2783e+08	2.47484e+08	3.27072e+08	2.41462e+08	2.33767e+08	2.20359e+08	2.27017e+08	2.43859e+08	2.34303e+08	2.32613e+08
PI(18:1_22:5)	PI	M+NH4	928.591	13.2677	C49 H87 O13 N1 P1	2.08946e+07	1.1271e+07	1.4952e+07	1.54379e+07	3.05669e+07	3.64278e+07	2.84345e+07	1.59102e+07	2.7423e+07	3.93839e+07	2.30351e+07	2.19498e+07	2.23141e+07	2.50576e+07	2.17495e+07	2.39505e+07	2.18881e+07
PI(40:6e)	PI	M+NH4	914.612	14.7317	C49 H89 O12 N1 P1	1.07205e+07	1.24127e+07	1.29389e+07	1.56594e+07	1.96624e+07	1.70033e+07	2.43215e+07	1.38586e+07	1.63481e+07	2.27894e+07	1.82677e+07	1.59161e+07	1.72634e+07	1.68296e+07	2.00172e+07	1.65654e+07	1.48521e+07
PI(40:7)	PI	M+NH4	926.575	11.6129	C49 H85 O13 N1 P1	2.65562e+07	2.40403e+07	2.22219e+07	1.88271e+07	3.10226e+07	4.11807e+07	2.37017e+07	2.80801e+07	2.84638e+07	4.10759e+07	2.95468e+07	3.12578e+07	3.10532e+07	2.90586e+07	2.76069e+07	2.69496e+07	2.86363e+07
PI(18:1_22:6)	PI	M+NH4	926.575	12.3198	C49 H85 O13 N1 P1	4.48489e+08	3.5871e+08	3.42515e+08	3.70672e+08	5.66524e+08	7.15531e+08	7.29201e+08	4.46124e+08	5.87542e+08	7.14337e+08	4.97119e+08	5.18291e+08	4.96206e+08	5.61803e+08	5.46198e+08	5.4516e+08	5.48834e+08
PI(40:8)	PI	M+NH4	924.56	10.9068	C49 H83 O13 N1 P1	1.65934e+07	1.88129e+07	1.81194e+07	2.02416e+07	2.3075e+07	4.56345e+07	3.52579e+07	2.68843e+07	4.64874e+07	4.25469e+07	2.9269e+07	2.92435e+07	2.86476e+07	3.02763e+07	2.85314e+07	2.73688e+07	3.26845e+07
PI(41:5)	PI	M+NH4	944.622	14.7508	C50 H91 O13 N1 P1	6.06436e+06	5.99825e+06	5.06703e+06	5.42957e+06	9.33201e+06	4.80448e+06	8.12953e+06	7.68499e+06	6.9608e+06	1.0327e+07	9.483e+06	1.01363e+07	9.25951e+06	7.1424e+06	9.20491e+06	7.62548e+06	8.14408e+06
PI(42:5)	PI	M+NH4	958.638	15.0261	C51 H93 O13 N1 P1	1.22855e+07	1.11926e+07	9.35332e+06	1.38154e+07	2.02387e+07	2.05431e+07	2.39715e+07	1.36248e+07	1.59839e+07	2.01307e+07	1.59422e+07	1.66248e+07	1.89946e+07	1.82813e+07	1.42968e+07	1.75142e+07	1.50628e+07
PI(42:6)	PI	M+NH4	956.622	14.6141	C51 H91 O13 N1 P1	6.49307e+06	4.53637e+06	5.20939e+06	5.89362e+06	1.06268e+07	7.89063e+06	8.02364e+06	6.13699e+06	4.24607e+06	1.61117e+07	7.84846e+06	8.05782e+06	8.05888e+06	7.28793e+06	7.07742e+06	8.48605e+06	7.2213e+06
PI(42:7)	PI	M+NH4	954.607	13.6986	C51 H89 O13 N1 P1	2.50194e+08	2.11513e+08	1.92993e+08	2.05156e+08	3.62118e+08	4.76138e+08	4.56498e+08	2.59666e+08	3.51521e+08	4.69662e+08	3.34775e+08	3.3803e+08	3.33036e+08	3.33515e+08	3.2379e+08	3.41619e+08	3.49637e+08
PI(42:8)	PI	M+NH4	952.591	12.3885	C51 H87 O13 N1 P1	1.81541e+08	1.91566e+08	1.64815e+08	1.66987e+08	2.27092e+08	3.76272e+08	3.32959e+08	2.32975e+08	3.02889e+08	3.38377e+08	2.51936e+08	2.46444e+08	2.47863e+08	2.43684e+08	2.40503e+08	2.42438e+08	2.34331e+08
PI(42:9)	PI	M+NH4	950.575	11.1848	C51 H85 O13 N1 P1	2.57377e+07	2.4768e+07	1.58561e+07	1.75639e+07	3.04253e+07	5.0741e+07	3.96945e+07	2.91796e+07	3.31847e+07	4.35044e+07	2.93559e+07	2.86215e+07	3.32508e+07	2.92055e+07	2.91959e+07	3.32372e+07	3.14634e+07
PI(43:0)	PI	M+H	965.705	19.429	C52 H102 O13 N0 P1	3.57056e+07	3.31717e+07	2.53081e+07	2.86504e+07	2.62776e+07	1.27742e+07	1.4284e+07	3.68629e+07	1.31269e+07	2.1756e+07	2.41401e+07	2.36151e+07	2.63685e+07	2.57771e+07	2.69098e+07	2.46475e+07	2.58957e+07
PI(44:11)	PI	M+NH4	974.575	10.8284	C53 H85 O13 N1 P1	426328	1.36695e+06	1.50777e+06	439014	3.58437e+06	7.27681e+06	5.44926e+06	1.43638e+06	1.91404e+06	6.75544e+06	3.89764e+06	3.6341e+06	2.79956e+06	2.0688e+06	3.32629e+06	3.49404e+06	2.87549e+06
PI(44:3)	PI	M+NH4	990.701	19.235	C53 H101 O13 N1 P1	7.51556e+06	1.04177e+07	6.70804e+06	6.01728e+06	6.50111e+06	3.01778e+06	5.92573e+06	7.24423e+06	4.67517e+06	5.32093e+06	4.98903e+06	5.35811e+06	6.37008e+06	8.01202e+06	6.87449e+06	6.84977e+06	5.28806e+06
PI(44:7)	PI	M+NH4	982.638	14.963	C53 H93 O13 N1 P1	7.06711e+06	8.80808e+06	5.95668e+06	6.4184e+06	7.07534e+06	7.73518e+06	9.87744e+06	7.92735e+06	1.78387e+07	8.38236e+06	8.15232e+06	9.24232e+06	8.60428e+06	6.01672e+06	8.99892e+06	8.17215e+06	9.26046e+06
PI(45:1)	PI	M+Na	1013.7	19.0072	C54 H103 O13 N0 P1 Na1	1.09975e+07	1.23295e+07	7.18973e+06	6.18454e+06	8.06638e+06	6.34544e+06	7.26066e+06	1.60228e+07	5.44555e+06	7.3929e+06	8.22202e+06	7.87875e+06	8.09804e+06	9.02643e+06	7.73493e+06	7.90123e+06	8.15233e+06
PI(45:2)	PI	M+H	989.705	19.2438	C54 H102 O13 N0 P1	1.3062e+07	1.18734e+07	7.87948e+06	7.18372e+06	7.98139e+06	4.78496e+06	7.49618e+06	1.26528e+07	5.70001e+06	7.54072e+06	1.08039e+07	7.71614e+06	7.14004e+06	7.64446e+06	8.28585e+06	9.09356e+06	9.6991e+06
PIP(16:2)	PIP	M+Na	685.2	17.897	C25 H44 O16 N0 P2 Na1	885562	807648	1.06178e+06	758373	817327	208138	447353	875906	270767	985511	707431	583937	802781	425490	707017	653374	755816
PIP(33:1)	PIP	M+H	903.499	11.491	C42 H81 O16 N0 P2	2.47349e+06	1.12374e+06	1.23671e+06	361355	3.39255e+06	209816	0	712564	0	2.07792e+06	3.21468e+06	3.16178e+06	2.77382e+06	2.87375e+06	2.20351e+06	3.34006e+06	2.5389e+06
PIP(35:0)	PIP	M+NH4	950.573	11.196	C44 H90 O16 N1 P2	2.57572e+07	2.47662e+07	1.58488e+07	1.75008e+07	2.95964e+07	5.07337e+07	3.96891e+07	2.91745e+07	3.31821e+07	4.40064e+07	2.93571e+07	2.82713e+07	3.32497e+07	2.91801e+07	2.91962e+07	3.32073e+07	3.14348e+07
PIP(46:8)	PIP	M+NH4	1088.62	11.857	C55 H96 O16 N1 P2	0	0	0	5.90265e+06	1.00826e+07	2.02555e+06	3.46702e+06	0.693	9.69	5.61206e+06	5.2201e+06	4.81485e+06	6.89237e+06	4.87362e+06	7.51848e+06	3.4911e+06	5.37346e+06
PIP(47:6)	PIP	M+H	1089.64	11.874	C56 H99 O16 N0 P2	0	0	0	1.91877e+06	1.20687e+06	132434	2.82157e+06	0	0	1.55657e+06	711473	1.95699e+06	1.87352e+06	93447.4	561473	1.67515e+06	1.30412e+06
PIP(52:3)	PIP	M+Na	1187.75	15.5041	C61 H114 O16 N0 P2 Na1	3.13327e+06	4.04547e+06	1.78702e+06	2.41984e+06	8.72545e+06	1.33825e+07	5.82612e+06	5.98835e+06	4.87778e+06	1.19164e+07	9.16642e+06	8.78653e+06	7.2891e+06	8.79196e+06	7.22555e+06	8.82333e+06	9.45997e+06
PIP3(24:2)	PIP3	M+H	935.276	17.67	C33 H63 O22 N0 P4	2.63712e+06	2.00675e+06	1.84111e+06	3.83468e+06	3.38591e+06	4.78108e+06	5.2452e+06	871301	3.60788e+06	4.42808e+06	2.40578e+06	2.08596e+06	1.98122e+06	2.51659e+06	2.41969e+06	1.95623e+06	2.55086e+06
PIP3(27:2)	PIP3	M+NH4	994.349	19.216	C36 H72 O22 N1 P4	1.22627e+07	8.46398e+06	1.29068e+07	1.36619e+07	1.08607e+07	1.39239e+07	1.46735e+07	8.6123e+06	1.87666e+07	1.54809e+07	1.4334e+07	1.40342e+07	1.32646e+07	1.29331e+07	1.39405e+07	1.32285e+07	1.30167e+07
PMe(18:0_18:2)	PMe	M+H	715.527	14.28	C40 H76 O8 N0 P1	1.02826e+06	748907	1.97225e+06	765621	8.08144e+06	6.4439e+06	1.94316e+06	1.70863e+06	5.98466e+06	5.4782e+06	2.84107e+06	3.4171e+06	1.63432e+06	3.25417e+06	2.93165e+06	3.2786e+06	2.55916e+06
PS(28:1e)	PS	M+H	664.455	5.7788	C34 H67 O9 N1 P1	2.27633e+06	2.67921e+06	2.05954e+06	2.60156e+06	1.52514e+06	2.79212e+06	3.04597e+06	2.67156e+06	3.56157e+06	2.68148e+06	2.47538e+06	2.59515e+06	2.67822e+06	2.44065e+06	1.94378e+06	2.19435e+06	2.44926e+06
PS(10:1e_18:1)	PS	M+H	662.439	6.43945	C34 H65 O9 N1 P1	1.7396e+06	1.82391e+06	1.08822e+06	1.23436e+06	1.03445e+06	2.48206e+06	1.94718e+06	2.43896e+06	2.49856e+06	1.51346e+06	1.65084e+06	1.60294e+06	1.46142e+06	1.68422e+06	1.4792e+06	1.57099e+06	1.65311e+06
PS(33:0)	PS	M+Na	772.51	10.4892	C39 H76 O10 N1 P1 Na1	4.5984e+06	7.91914e+06	5.11316e+06	5.14976e+06	1.2907e+06	3.72408e+06	3.34677e+06	4.02209e+06	6.40732e+06	3.39122e+06	3.5167e+06	3.43614e+06	3.70129e+06	3.33079e+06	3.64495e+06	3.28527e+06	4.00892e+06
PS(33:1)	PS	M+H	748.512	9.066	C39 H75 O10 N1 P1	4.08843e+06	4.63444e+06	2.903e+06	3.16812e+06	1.64008e+06	2.81383e+06	2.86826e+06	2.57782e+06	4.23478e+06	2.58631e+06	2.32339e+06	2.74183e+06	2.52345e+06	2.60199e+06	2.50583e+06	2.92231e+06	2.45194e+06
PS(33:4)	PS	M+Na	764.447	12.229	C39 H68 O10 N1 P1 Na1	364326	547753	246119	0	112854	630461	0	1.42773e+06	456481	1.82123e+06	1.01791e+06	629265	1.48228e+06	246957	1.4089e+06	1.26857e+06	821179
PS(18:0_16:1)	PS	M+Na	784.51	11.6819	C40 H76 O10 N1 P1 Na1	1.71941e+07	2.12704e+07	1.17246e+07	6.62558e+06	1.24201e+07	1.55805e+07	1.09423e+07	1.3498e+07	1.10844e+07	1.7382e+07	2.16021e+07	2.31044e+07	2.21948e+07	2.31864e+07	2.52454e+07	2.33124e+07	2.70552e+07
PS(35:0)	PS	M+Na	800.541	11.9477	C41 H80 O10 N1 P1 Na1	1.40549e+07	1.97888e+07	1.30036e+07	1.84127e+07	3.50005e+06	1.18257e+06	1.06519e+07	6.41637e+06	1.57506e+07	9.40777e+06	1.05136e+07	7.44931e+06	8.79455e+06	1.06419e+07	8.67487e+06	9.04263e+06	1.18974e+07
PS(35:2)	PS	M+Na	796.51	10.5765	C41 H76 O10 N1 P1 Na1	8.79448e+06	1.12246e+07	7.35454e+06	7.3927e+06	3.06859e+06	7.00529e+06	1.32499e+07	7.89365e+06	1.07925e+07	5.96782e+06	6.2057e+06	7.14014e+06	7.23951e+06	7.37021e+06	6.98262e+06	7.07426e+06	7.26612e+06
PS(35:3)	PS	M+H	772.512	10.483	C41 H75 O10 N1 P1	4.5984e+06	7.91914e+06	5.11316e+06	5.14976e+06	1.2907e+06	3.72408e+06	3.34677e+06	4.02209e+06	6.40732e+06	3.39122e+06	3.5167e+06	3.43614e+06	3.70129e+06	3.33079e+06	3.64495e+06	3.28527e+06	4.00892e+06
PS(36:0)	PS	M+Na	814.557	11.4407	C42 H82 O10 N1 P1 Na1	3.91051e+07	3.58737e+07	3.36503e+07	3.89073e+07	2.92757e+07	2.6931e+07	3.92798e+07	2.65734e+07	3.18494e+07	3.45356e+07	3.09887e+07	2.99771e+07	3.19367e+07	3.121e+07	3.28421e+07	3.08707e+07	3.15159e+07
PS(36:1e)	PS	M+H	776.58	12.521	C42 H83 O9 N1 P1	3.39242e+07	3.09395e+07	2.83996e+07	3.60883e+07	2.03932e+07	7.58939e+07	9.45149e+07	4.54926e+07	6.68103e+07	4.25319e+07	4.30873e+07	3.86397e+07	3.9174e+07	3.99675e+07	3.93876e+07	3.87906e+07	4.09279e+07
PS(16:0_20:3)	PS	M+Na	808.51	11.2586	C42 H76 O10 N1 P1 Na1	3.12595e+07	4.02178e+07	2.83205e+07	2.41004e+07	2.38954e+07	2.19299e+07	2.29154e+07	4.36802e+07	2.08234e+07	2.83015e+07	4.33405e+07	4.47514e+07	3.75238e+07	4.01922e+07	3.97755e+07	3.73679e+07	4.43302e+07
PS(16:0_22:0)	PS	M+H	820.606	16.9932	C44 H87 O10 N1 P1	1.48832e+07	4.5785e+06	3.08175e+06	0	548731	3.43713e+06	3.2864e+06	6.63997e+07	2.66001e+06	1.29227e+06	1.56947e+07	1.63688e+07	1.65981e+07	1.55072e+07	1.48426e+07	1.58682e+07	1.64511e+07
PS(38:1)	PS	M+Na	840.573	11.785	C44 H84 O10 N1 P1 Na1	5.11462e+06	4.40697e+06	4.31843e+06	3.0514e+06	5.86647e+06	3.48306e+06	4.95289e+06	2.5927e+06	5.26364e+06	4.55707e+06	2.21566e+06	2.85606e+06	2.26422e+06	4.35287e+06	3.91802e+06	4.19527e+06	1.96396e+06
PS(18:0_20:3)	PS	M+Na	836.541	12.8053	C44 H80 O10 N1 P1 Na1	5.06589e+07	5.3719e+07	3.53361e+07	2.9437e+07	3.34883e+07	2.50143e+07	3.55126e+07	5.16087e+07	1.7477e+07	3.56581e+07	5.17619e+07	5.23565e+07	5.24115e+07	5.99556e+07	5.74598e+07	6.08035e+07	5.13951e+07
PS(38:4e)	PS	M+Na	820.546	9.511	C44 H80 O9 N1 P1 Na1	1.51128e+07	2.22754e+07	1.43949e+07	1.58759e+07	4.37393e+06	1.68638e+07	1.73819e+07	1.00266e+07	2.35383e+07	1.09452e+07	1.46542e+07	1.13039e+07	1.08677e+07	1.15083e+07	9.70693e+06	9.6635e+06	1.13096e+07
PS(38:5e)	PS	M+Na	818.531	11.1701	C44 H78 O9 N1 P1 Na1	2.13422e+07	2.2561e+07	1.51544e+07	1.50319e+07	8.91708e+06	1.59631e+07	1.779e+07	7.24137e+06	6.89923e+06	2.23324e+07	1.37562e+07	1.59209e+07	1.53239e+07	1.60992e+07	1.36349e+07	1.53749e+07	1.37969e+07
PS(16:0_22:6)	PS	M+H	808.512	11.2592	C44 H75 O10 N1 P1	3.16832e+07	3.85474e+07	2.61544e+07	2.38975e+07	2.235e+07	2.0833e+07	2.33025e+07	4.13658e+07	1.97724e+07	2.67044e+07	4.02381e+07	4.15181e+07	3.97596e+07	4.11171e+07	4.09498e+07	3.86002e+07	4.40709e+07
PS(40:0)	PS	M+H	848.638	16.963	C46 H91 O10 N1 P1	7.1075e+06	6.3997e+06	4.0618e+06	7.31262e+06	5.04093e+06	8.46534e+06	1.23755e+07	1.17553e+07	5.46852e+06	6.65778e+06	7.1999e+06	6.5861e+06	6.4545e+06	6.48258e+06	6.33266e+06	6.46313e+06	6.25958e+06
PS(18:1_22:0)	PS	M+H	846.622	17.014	C46 H89 O10 N1 P1	5.33295e+06	2.07039e+06	1.39868e+06	862843	786805	970403	350771	1.18341e+07	1.28885e+06	250948	2.91764e+06	3.05167e+06	2.55856e+06	3.02169e+06	2.64178e+06	3.20488e+06	2.86693e+06
PS(40:8e)	PS	M+H	818.533	11.1673	C46 H77 O9 N1 P1	2.13422e+07	2.2561e+07	1.51544e+07	1.50319e+07	8.91708e+06	1.59631e+07	1.779e+07	7.24137e+06	6.89923e+06	2.23324e+07	1.37562e+07	1.59209e+07	1.53239e+07	1.60992e+07	1.36349e+07	1.53749e+07	1.37969e+07
PS(42:6)	PS	M+Na	886.557	9.37662	C48 H82 O10 N1 P1 Na1	9.45989e+06	9.00462e+06	6.35996e+06	8.62044e+06	5.3431e+06	7.01709e+06	1.38577e+07	1.09245e+07	1.48421e+07	9.3499e+06	9.45504e+06	9.33551e+06	8.82927e+06	8.75658e+06	8.50477e+06	9.41411e+06	8.95314e+06
PS(22:4_22:4)	PS	M+H	888.575	10.2465	C50 H83 O10 N1 P1	3.77452e+06	5.98574e+06	7.20808e+06	9.0708e+06	4.82576e+06	5.31614e+06	8.59251e+06	1.04149e+07	5.63383e+06	7.40802e+06	8.92765e+06	4.78896e+06	8.40556e+06	7.9762e+06	3.35763e+06	8.67014e+06	4.10502e+06
PS(45:2)	PS	M+Na	936.666	14.5805	C51 H96 O10 N1 P1 Na1	7.99054e+06	1.07371e+07	9.36039e+06	6.21391e+06	4.3648e+06	1.58474e+06	5.08414e+06	3.0197e+06	4.85628e+06	9.10913e+06	6.35737e+06	4.64863e+06	7.83419e+06	6.85207e+06	5.97714e+06	4.92104e+06	5.49648e+06
PS(46:2)	PS	M+Na	950.682	14.615	C52 H98 O10 N1 P1 Na1	1.15242e+06	2.02126e+06	628804	1.48302e+06	0	0	603600	0	1.17368e+07	0	1.406e+06	2.08707e+06	3.26722e+06	1.01017e+06	2.38724e+06	418288	976214
PS(47:6)	PS	M+Na	956.635	14.623	C53 H92 O10 N1 P1 Na1	4.32853e+06	2.71062e+06	3.49114e+06	4.32326e+06	7.48875e+06	5.58948e+06	5.22562e+06	4.44149e+06	2.25967e+06	1.14072e+07	5.29045e+06	5.48589e+06	6.60608e+06	6.33079e+06	4.82105e+06	7.60401e+06	4.82758e+06
PS(48:0)	PS	M+H	960.763	17.589	C54 H107 O10 N1 P1	5.14127e+06	6.57854e+06	5.60762e+06	4.45562e+06	1.06532e+06	1.16054e+07	1.60454e+07	7.49157e+06	1.73022e+07	1.0219e+07	5.92025e+06	7.69388e+06	5.79903e+06	7.8301e+06	6.69496e+06	7.7716e+06	6.61957e+06
SM(d31:0)	SM	M+H	663.544	10.653	C36 H76 O6 N2 P1	5.0823e+06	4.69797e+06	4.58737e+06	3.65879e+06	6.16105e+06	3.46506e+06	2.88925e+06	4.25272e+06	3.01099e+06	4.68869e+06	5.09092e+06	4.65283e+06	4.4927e+06	4.21944e+06	5.22938e+06	4.2514e+06	4.814e+06
SM(d31:1)	SM	M+H	661.528	10.149	C36 H74 O6 N2 P1	965128	1.1691e+06	1.12914e+06	853156	521144	1.88699e+06	2.13939e+06	1.20466e+06	1.75355e+06	1.10031e+06	1.18991e+06	923520	887440	1.01274e+06	1.05124e+06	1.01475e+06	1.10013e+06
SM(d18:1_14:0)	SM	M+Na	697.525	10.9885	C37 H75 O6 N2 P1 Na1	3.96371e+06	4.66602e+06	4.67571e+06	3.79403e+06	2.99166e+06	1.02668e+07	1.1551e+07	5.73574e+06	8.22738e+06	5.58123e+06	5.85923e+06	5.15444e+06	5.49291e+06	5.28994e+06	5.24137e+06	4.90798e+06	4.79937e+06
SM(d33:0)	SM	M+H	691.575	8.047	C38 H80 O6 N2 P1	8.93429e+06	219847	6.58686e+06	2.51724e+06	1.0339e+06	235705	3.49937e+06	560657	392105	1.97884e+06	4.6751e+06	196775	654156	1.13637e+06	2.4187e+06	3.02324e+06	697610
SM(d33:1)	SM	M+H	689.559	11.7957	C38 H78 O6 N2 P1	1.8015e+08	2.07367e+08	1.97018e+08	1.89351e+08	1.61267e+08	3.07217e+08	3.77083e+08	2.12648e+08	3.10242e+08	2.30104e+08	2.22107e+08	2.08092e+08	2.28953e+08	2.22939e+08	2.11649e+08	2.16902e+08	2.30655e+08
SM(d34:0)	SM	M+H	705.591	13.207	C39 H82 O6 N2 P1	5.05938e+08	4.52145e+08	4.87726e+08	6.17038e+08	4.3297e+08	6.28592e+08	7.80366e+08	4.86831e+08	6.83206e+08	5.09567e+08	5.40486e+08	5.42249e+08	5.36361e+08	5.1877e+08	5.45156e+08	5.1286e+08	5.3948e+08
SM(d18:1_16:0)	SM	M+Na	725.557	12.5999	C39 H79 O6 N2 P1 Na1	1.3758e+08	1.40334e+08	1.45718e+08	1.47583e+08	1.20413e+08	1.79087e+08	1.72427e+08	1.41877e+08	1.52632e+08	1.40158e+08	1.44658e+08	1.46644e+08	1.4147e+08	1.42537e+08	1.3961e+08	1.42898e+08	1.44665e+08
SM(d36:0)	SM	M+H	733.622	14.6755	C41 H86 O6 N2 P1	9.13003e+07	9.10279e+07	1.04024e+08	1.14198e+08	6.90234e+07	9.04158e+07	1.22661e+08	8.25806e+07	8.77807e+07	6.76671e+07	8.75917e+07	8.57041e+07	8.46933e+07	8.46914e+07	9.16298e+07	8.47576e+07	8.93725e+07
SM(d36:2)	SM	M+H	729.591	12.7978	C41 H82 O6 N2 P1	1.65198e+07	1.75388e+07	3.05969e+07	3.74615e+07	1.67518e+07	2.35911e+07	2.39905e+07	1.45436e+07	2.35933e+07	1.49807e+07	2.07242e+07	1.94974e+07	2.12771e+07	1.88978e+07	1.95514e+07	2.27994e+07	2.40057e+07
SM(d36:3)	SM	M+H	727.575	11.5328	C41 H80 O6 N2 P1	1.5231e+06	1.38171e+06	1.83494e+06	849540	1.36156e+06	8.01178e+06	6.62716e+06	2.88527e+06	3.90329e+06	3.0125e+06	2.80359e+06	4.21064e+06	2.5587e+06	2.64084e+06	2.7259e+06	3.46803e+06	3.24596e+06
SM(d18:1_18:2)	SM	M+H	727.575	13.2332	C41 H80 O6 N2 P1	3.27545e+06	2.47753e+06	4.82952e+06	4.43557e+06	8.45984e+06	1.57629e+06	3.81311e+06	1.52623e+06	4.1376e+06	4.82139e+06	5.2697e+06	5.05781e+06	5.9406e+06	3.96995e+06	4.94102e+06	4.82942e+06	4.07713e+06
SM(d36:4)	SM	M+H	725.559	12.553	C41 H78 O6 N2 P1	1.3758e+08	1.40334e+08	1.45718e+08	1.47583e+08	1.20413e+08	1.79087e+08	1.72427e+08	1.41877e+08	1.52632e+08	1.40158e+08	1.44658e+08	1.46644e+08	1.4147e+08	1.42537e+08	1.3961e+08	1.42898e+08	1.44665e+08
SM(d36:5)	SM	M+H	723.544	11.1475	C41 H76 O6 N2 P1	1.23364e+07	1.25438e+07	1.55837e+07	1.43768e+07	1.57404e+07	1.0257e+07	1.33566e+07	7.1702e+06	1.54426e+07	1.48502e+07	1.35122e+07	1.12773e+07	1.24313e+07	1.25897e+07	1.20733e+07	1.32728e+07	1.39148e+07
SM(d37:0)	SM	M+H	747.637	15.3543	C42 H88 O6 N2 P1	4.71955e+06	7.41118e+06	3.79993e+06	6.71717e+06	840655	6.26095e+06	7.44899e+06	5.50908e+06	3.94061e+06	2.25775e+06	6.52628e+06	2.47621e+06	3.94817e+06	4.26637e+06	3.93692e+06	3.32301e+06	3.81271e+06
SM(d18:1_20:0)	SM	M+H	759.637	15.797	C43 H88 O6 N2 P1	4.74168e+08	4.51388e+08	5.41796e+08	6.03091e+08	3.45861e+08	9.7883e+08	9.78641e+08	5.03639e+08	6.14604e+08	5.23795e+08	4.56948e+08	5.49188e+08	5.25899e+08	5.30726e+08	5.21024e+08	5.26431e+08	5.17356e+08
SM(d38:2)	SM	M+H	757.622	14.2513	C43 H86 O6 N2 P1	4.52069e+07	6.03545e+07	7.29793e+07	6.56746e+07	4.93512e+07	6.94321e+07	7.35823e+07	4.43071e+07	8.8947e+07	5.80761e+07	5.71789e+07	5.3756e+07	5.97235e+07	5.65085e+07	5.28576e+07	5.20575e+07	5.88603e+07
SM(d39:0)	SM	M+H	775.669	16.6053	C44 H92 O6 N2 P1	9.9626e+06	6.95863e+06	7.38037e+06	6.2414e+06	4.80867e+06	1.04189e+07	8.17784e+06	9.27328e+06	9.78495e+06	1.05989e+07	7.73151e+06	1.02394e+07	5.63234e+06	7.98833e+06	6.98879e+06	8.91314e+06	8.94548e+06
SM(d39:2)	SM	M+H	771.637	14.7363	C44 H88 O6 N2 P1	1.56422e+07	3.09236e+07	2.47014e+07	1.98839e+07	2.05275e+07	2.91344e+07	1.76322e+07	2.0305e+07	4.0959e+07	3.22691e+07	2.44795e+07	2.47526e+07	2.32989e+07	2.4541e+07	2.39117e+07	2.40674e+07	2.54464e+07
SM(d18:1_21:1)	SM	M+H	771.637	16.8603	C44 H88 O6 N2 P1	7.08696e+06	8.78811e+06	8.13725e+06	8.65058e+06	5.17136e+06	1.45615e+07	2.05617e+07	1.18295e+07	9.10265e+06	6.97309e+06	1.05022e+07	9.19389e+06	7.71971e+06	8.23907e+06	9.4476e+06	8.38698e+06	8.53465e+06
SM(d18:1_22:0)	SM	M+Na	809.651	16.7579	C45 H91 O6 N2 P1 Na1	7.56675e+08	7.17223e+08	7.50554e+08	6.77933e+08	7.54342e+08	7.02606e+08	6.82038e+08	6.94513e+08	6.97752e+08	8.38461e+08	7.61475e+08	7.42133e+08	7.52908e+08	7.26822e+08	7.67017e+08	7.62807e+08	6.84864e+08
SM(d18:2_22:0)	SM	M+Na	807.635	15.773	C45 H89 O6 N2 P1 Na1	1.65264e+07	1.93488e+07	1.73291e+07	1.36412e+07	1.29287e+07	1.49907e+07	1.3826e+07	1.0349e+07	2.31775e+07	1.70742e+07	1.65138e+07	1.67273e+07	1.3802e+07	1.5043e+07	1.49178e+07	1.43963e+07	1.4811e+07
SM(d40:3)	SM	M+H	783.637	14.2611	C45 H88 O6 N2 P1	6.1563e+07	8.22733e+07	7.00314e+07	7.42072e+07	6.34089e+07	8.43582e+07	1.16733e+08	7.83606e+07	9.4515e+07	7.90673e+07	7.1655e+07	7.17145e+07	7.2374e+07	7.28319e+07	6.87108e+07	7.24165e+07	6.7825e+07
SM(d40:4)	SM	M+H	781.622	15.5389	C45 H86 O6 N2 P1	1.12683e+08	1.21045e+08	1.25409e+08	1.19849e+08	1.18844e+08	1.39494e+08	1.42805e+08	9.34643e+07	1.49422e+08	1.38092e+08	1.22877e+08	1.25121e+08	1.23764e+08	1.27804e+08	1.23194e+08	1.21749e+08	1.21484e+08
SM(d40:6)	SM	M+H	777.591	10.993	C45 H82 O6 N2 P1	6.62876e+06	9.51487e+06	8.98596e+06	1.28489e+07	5.06163e+06	6.34583e+06	8.59685e+06	1.05674e+07	1.01435e+07	5.64958e+06	7.10033e+06	7.18217e+06	7.01238e+06	7.12703e+06	6.74071e+06	6.68839e+06	7.2202e+06
SM(d40:7)	SM	M+H	775.575	10.9995	C45 H80 O6 N2 P1	1.68012e+06	2.69548e+06	2.46353e+06	3.0441e+06	1.27956e+06	5.00182e+06	8.36055e+06	3.92287e+06	6.38185e+06	3.5122e+06	2.00083e+06	3.18553e+06	2.72208e+06	2.93718e+06	2.11835e+06	2.95484e+06	3.35958e+06
SM(d40:8)	SM	M+H	773.559	10.0671	C45 H78 O6 N2 P1	2.32758e+06	1.65694e+06	1.40441e+06	6.1736e+06	2.89928e+06	7.22127e+06	4.46123e+06	2.36049e+06	5.31862e+06	1.60864e+06	4.98507e+06	4.59277e+06	2.37578e+06	2.07398e+06	2.11041e+06	2.17591e+06	2.6952e+06
SM(d18:1_23:0)	SM	M+Na	823.666	17.276	C46 H93 O6 N2 P1 Na1	6.48639e+08	7.02834e+08	5.54703e+08	6.04159e+08	4.80899e+08	7.46527e+08	7.65009e+08	7.21807e+08	6.90945e+08	5.80527e+08	6.56679e+08	6.78796e+08	6.58577e+08	6.60874e+08	6.40077e+08	6.54688e+08	6.38112e+08
SM(d41:3)	SM	M+H	797.653	14.9255	C46 H90 O6 N2 P1	9.38718e+07	1.15415e+08	1.03172e+08	1.05396e+08	6.9961e+07	1.11599e+08	1.59147e+08	1.13622e+08	1.14195e+08	8.79066e+07	1.04863e+08	9.44981e+07	9.48538e+07	9.06766e+07	9.15557e+07	9.40938e+07	9.62579e+07
SM(d17:1_24:3)	SM	M+H	795.637	16.1184	C46 H88 O6 N2 P1	1.31617e+08	1.61313e+08	1.06417e+08	1.13535e+08	7.35272e+07	1.60766e+08	1.53759e+08	1.22166e+08	1.95015e+08	1.22784e+08	1.26667e+08	1.2692e+08	1.29963e+08	1.30645e+08	1.23601e+08	1.15352e+08	1.19058e+08
SM(d41:4)	SM	M+H	795.637	19.1533	C46 H88 O6 N2 P1	9.65201e+06	1.75423e+07	5.36281e+07	6.08904e+07	3.40948e+07	3.13084e+07	2.62357e+07	1.71546e+07	4.37727e+07	2.78851e+07	3.25844e+07	3.19778e+07	3.21316e+07	4.28228e+07	3.05017e+07	3.12277e+07	4.26696e+07
SM(d41:6)	SM	M+H	791.606	14.561	C46 H84 O6 N2 P1	3.6567e+07	4.66984e+07	4.26874e+07	4.88274e+07	3.68102e+07	4.10963e+07	5.08092e+07	4.53222e+07	4.51613e+07	3.61446e+07	4.2954e+07	4.81818e+07	4.46124e+07	5.03968e+07	4.85202e+07	4.88309e+07	4.70539e+07
SM(d42:0)	SM	M+H	817.716	18.0973	C47 H98 O6 N2 P1	1.83975e+08	1.61463e+08	1.30428e+08	1.58376e+08	1.13713e+08	3.05593e+08	2.14213e+08	2.01678e+08	3.19303e+08	1.84349e+08	1.87225e+08	1.7332e+08	1.73142e+08	1.78501e+08	1.65871e+08	1.78432e+08	1.70838e+08
SM(d18:1_24:0)	SM	M+Na	837.682	17.0782	C47 H95 O6 N2 P1 Na1	2.95056e+07	3.08843e+07	2.32021e+07	2.93611e+07	1.66598e+07	4.32345e+07	4.55892e+07	3.60159e+07	4.33069e+07	2.55693e+07	3.00078e+07	2.83014e+07	2.63025e+07	2.92703e+07	2.78698e+07	2.91337e+07	2.89248e+07
SM(d18:0_24:1)	SM	M+H	815.7	18.52	C47 H96 O6 N2 P1	2.0934e+07	4.2856e+07	3.76702e+07	1.8486e+07	1.36147e+07	2.58824e+07	2.32483e+07	3.15419e+07	7.95492e+07	2.67739e+07	4.09011e+07	2.93956e+07	3.26307e+07	2.75508e+07	3.42431e+07	3.67274e+07	4.3713e+07
SM(d18:1_24:1)	SM	M+H	813.684	16.6357	C47 H94 O6 N2 P1	1.32299e+10	1.5839e+10	1.36786e+10	1.49767e+10	1.20385e+10	1.80156e+10	2.00248e+10	1.667e+10	1.60339e+10	1.44083e+10	1.50938e+10	1.45387e+10	1.42544e+10	1.44703e+10	1.42125e+10	1.41406e+10	1.41709e+10
SM(d18:2_24:1)	SM	M+H	811.669	17.1764	C47 H92 O6 N2 P1	2.87956e+07	3.26376e+07	2.34762e+07	2.30824e+07	1.70166e+07	4.46643e+07	3.15471e+07	2.90196e+07	4.75456e+07	2.76106e+07	2.92739e+07	2.92167e+07	2.8554e+07	2.74525e+07	2.76977e+07	2.87808e+07	2.72597e+07
SM(d18:1_24:3)	SM	M+H	809.653	16.7879	C47 H90 O6 N2 P1	7.65054e+08	7.1879e+08	7.5976e+08	7.18473e+08	7.54014e+08	7.02283e+08	6.67042e+08	7.07474e+08	6.93614e+08	7.84839e+08	7.70022e+08	7.61717e+08	7.41254e+08	7.55407e+08	7.58761e+08	7.67564e+08	6.84805e+08
SM(d42:5)	SM	M+H	807.637	15.3859	C47 H88 O6 N2 P1	3.64846e+07	4.78627e+07	4.82658e+07	3.54941e+07	4.76157e+07	4.01891e+07	3.04883e+07	3.65962e+07	5.51292e+07	5.95951e+07	4.50189e+07	4.67458e+07	4.54242e+07	4.33229e+07	4.47289e+07	4.97136e+07	4.28722e+07
SM(d42:6)	SM	M+H	805.622	15.191	C47 H86 O6 N2 P1	9.56364e+06	1.14786e+07	9.41843e+06	9.47738e+06	8.35033e+06	1.20503e+07	1.65e+07	1.38518e+07	1.43276e+07	8.78799e+06	1.18109e+07	1.1636e+07	1.04214e+07	9.61e+06	1.31318e+07	8.68216e+06	1.06828e+07
SM(d42:7)	SM	M+H	803.606	10.25	C47 H84 O6 N2 P1	3.18323e+07	4.93583e+07	3.58276e+07	3.90796e+07	2.04136e+07	3.53428e+07	2.18633e+07	3.22395e+07	4.67578e+07	2.82523e+07	2.92337e+07	2.96114e+07	2.7946e+07	2.6892e+07	2.5963e+07	2.70055e+07	2.82617e+07
SM(d42:8)	SM	M+H	801.591	10.7567	C47 H82 O6 N2 P1	9.67058e+06	1.13582e+07	7.75202e+06	9.84944e+06	3.98469e+06	6.76557e+06	4.35182e+06	6.82993e+06	1.40707e+07	8.4788e+06	9.6655e+06	8.49777e+06	8.70855e+06	8.08221e+06	9.16705e+06	9.47912e+06	1.00634e+07
SM(d43:2)	SM	M+H	827.7	17.1601	C48 H96 O6 N2 P1	1.52431e+08	1.91787e+08	1.59398e+08	1.92234e+08	1.28902e+08	2.68655e+08	3.39258e+08	2.42269e+08	1.83309e+08	1.89496e+08	1.8562e+08	1.95036e+08	1.87273e+08	1.87171e+08	1.77349e+08	1.83185e+08	1.8786e+08
SM(d19:1_24:3)	SM	M+H	823.669	17.2718	C48 H92 O6 N2 P1	6.48639e+08	7.02834e+08	5.54703e+08	6.04159e+08	4.80899e+08	7.46527e+08	7.65009e+08	7.21807e+08	6.90945e+08	5.80527e+08	6.56679e+08	6.78796e+08	6.58577e+08	6.60874e+08	6.40077e+08	6.54688e+08	6.38112e+08
SM(d43:5)	SM	M+H	821.653	16.0191	C48 H90 O6 N2 P1	1.1481e+08	1.50169e+08	1.14407e+08	1.28814e+08	7.63833e+07	1.62684e+08	1.78243e+08	1.5119e+08	1.67224e+08	1.34199e+08	1.28528e+08	1.24099e+08	1.26561e+08	1.20065e+08	1.18638e+08	1.29891e+08	1.22262e+08
SM(d43:6)	SM	M+H	819.637	18.728	C48 H88 O6 N2 P1	7.49309e+07	6.95941e+07	2.14704e+07	7.57015e+07	3.17146e+07	6.23657e+07	8.9316e+07	1.68866e+07	6.72718e+07	3.65484e+07	3.75568e+07	3.78185e+07	3.48441e+07	3.62207e+07	3.58188e+07	3.85907e+07	2.69729e+07
SM(d43:7)	SM	M+H	817.622	18.326	C48 H86 O6 N2 P1	5.71231e+08	5.74605e+08	8.65454e+06	5.82034e+08	1.21341e+07	6.38701e+08	2.958e+07	5.72028e+08	5.02469e+08	1.58412e+07	6.1042e+08	1.67579e+07	1.51874e+07	1.2454e+07	5.83185e+08	5.94603e+08	1.30304e+07
SM(d44:3)	SM	M+H	839.7	16.6978	C49 H96 O6 N2 P1	1.20047e+07	1.48862e+07	1.88266e+07	2.50525e+07	1.53483e+07	1.85548e+07	2.87312e+07	2.41547e+07	2.23841e+07	1.46272e+07	1.60349e+07	1.7003e+07	1.7258e+07	16375153	1.88231e+07	1.66253e+07	1.62699e+07
SM(d44:4)	SM	M+H	837.684	17.6116	C49 H94 O6 N2 P1	1.61127e+08	1.79331e+08	1.09456e+08	1.11155e+08	7.15259e+07	1.47205e+08	1.08615e+08	1.1729e+08	1.28083e+08	8.38994e+07	7.16283e+07	1.18995e+08	1.29033e+08	1.26358e+08	1.18979e+08	1.21609e+08	1.21263e+08
SM(d44:5)	SM	M+H	835.669	16.5938	C49 H92 O6 N2 P1	7.97195e+08	7.68855e+08	7.93264e+08	8.06327e+08	8.96928e+08	8.01844e+08	7.86217e+08	7.82571e+08	7.76394e+08	8.32688e+08	8.23847e+08	8.27872e+08	8.39547e+08	8.4031e+08	8.27462e+08	8.5955e+08	8.33655e+08
SM(d44:6)	SM	M+H	833.653	15.5544	C49 H90 O6 N2 P1	1.51689e+08	2.01987e+08	1.91455e+08	1.91281e+08	1.98953e+08	1.87323e+08	2.6812e+08	1.83669e+08	1.82334e+08	1.75027e+08	1.9487e+08	1.82629e+08	1.91862e+08	1.79397e+08	1.79541e+08	1.76525e+08	1.71931e+08
SM(t32:1)	SM	M+H	691.538	10.5173	C37 H76 O7 N2 P1	1.5004e+06	1.53144e+06	1.50522e+06	1.83222e+06	902813	2.79437e+06	3.79197e+06	2.18018e+06	2.92921e+06	1.62812e+06	1.33652e+06	1.58345e+06	1.44433e+06	1.9241e+06	1.8338e+06	2.00486e+06	2.16882e+06
SM(t34:0)	SM	M+H	721.585	11.8032	C39 H82 O7 N2 P1	1.79832e+07	1.65982e+07	1.86023e+07	2.00726e+07	1.97766e+07	2.57427e+07	2.30079e+07	1.71854e+07	2.52653e+07	2.24409e+07	1.7917e+07	1.95784e+07	2.00586e+07	1.99456e+07	1.97059e+07	1.84931e+07	2.1369e+07
SM(t34:1)	SM	M+H	719.57	12.1237	C39 H80 O7 N2 P1	7.0889e+07	7.85492e+07	1.07722e+08	1.25657e+08	6.14162e+07	7.08257e+07	1.33704e+08	1.21119e+08	7.96897e+07	5.06857e+07	8.13483e+07	8.27179e+07	8.24416e+07	8.75469e+07	6.92144e+07	7.95744e+07	8.4575e+07
SM(t34:2)	SM	M+H	717.554	15.22	C39 H78 O7 N2 P1	8.7862e+06	7.4086e+06	5.78258e+06	6.64265e+06	8.5507e+06	2.19958e+07	8.49312e+06	8.79309e+06	8.86761e+06	9.68655e+06	8.75067e+06	7.72076e+06	7.59962e+06	7.61617e+06	8.39746e+06	7.41751e+06	6.79194e+06
SM(t36:1)	SM	M+H	747.601	13.677	C41 H84 O7 N2 P1	5.1832e+06	1.35653e+07	2.34786e+08	1.64934e+07	1.41251e+07	1.31101e+08	1.53427e+06	3.28231e+07	2.01352e+07	1.0454e+08	1.02367e+08	7.69143e+06	1.14863e+08	4.53689e+06	1.25421e+07	8.90128e+06	7.36339e+06
SM(t36:4)	SM	M+H	741.554	12.095	C41 H78 O7 N2 P1	7.3866e+06	6.14965e+06	1.09668e+07	1.27948e+07	6.6729e+06	9.48664e+06	1.54377e+07	6.81947e+06	5.21322e+06	6.95719e+06	8.4276e+06	9.76972e+06	9.91294e+06	6.65467e+06	7.08394e+06	7.5623e+06	7.45185e+06
SM(t38:3)	SM	M+H	771.601	16.1645	C43 H84 O7 N2 P1	1.20495e+07	1.47832e+07	1.22457e+07	1.40398e+07	7.60819e+06	1.62214e+07	2.25039e+07	1.90217e+07	1.46753e+07	1.11964e+07	1.28284e+07	1.35532e+07	1.23322e+07	1.26271e+07	1.2923e+07	1.19172e+07	1.15597e+07
SM(t38:5)	SM	M+H	767.57	9.506	C43 H80 O7 N2 P1	1.23093e+06	2.83328e+06	2.0861e+06	1.40076e+06	1.19998e+06	2.50164e+06	3.80755e+06	1.21644e+06	1.58592e+06	2.00515e+06	1.7594e+06	1.46207e+06	1.54829e+06	1.36049e+06	1.7766e+06	1.4978e+06	1.69672e+06
SM(t18:0_21:5)	SM	M+H	781.585	15.737	C44 H82 O7 N2 P1	1.08503e+07	1.51261e+07	1.37453e+07	2.00652e+07	8.59175e+06	1.52567e+07	2.43677e+07	1.64879e+07	1.58661e+07	9.41277e+06	1.30525e+07	1.12398e+07	1.39297e+07	1.20885e+07	1.12811e+07	1.4196e+07	1.40576e+07
SM(t39:7)	SM	M+H	777.554	14.6623	C44 H78 O7 N2 P1	1.73824e+08	1.98517e+08	1.83867e+08	2.11246e+08	1.3935e+08	2.04095e+08	3.00933e+08	2.1003e+08	2.00246e+08	1.57267e+08	1.99914e+08	1.89907e+08	1.84457e+08	1.89096e+08	1.85377e+08	1.87065e+08	1.92809e+08
SM(t40:1)	SM	M+H	803.664	16.45	C45 H92 O7 N2 P1	9.52348e+06	1.16486e+07	1.20453e+07	1.52989e+07	3.90469e+06	1.55793e+07	1.14425e+07	1.37778e+07	1.31572e+07	9.43318e+06	1.03283e+07	1.23248e+07	1.02194e+07	9.46951e+06	9.66921e+06	8.38206e+06	1.16274e+07
SM(t40:4)	SM	M+H	797.617	16.1632	C45 H86 O7 N2 P1	1.39727e+07	1.75308e+07	1.28097e+07	1.17081e+07	7.73821e+06	1.8191e+07	2.07262e+07	1.47227e+07	2.16885e+07	1.49687e+07	1.43298e+07	1.56072e+07	1.37344e+07	1.52191e+07	1.37171e+07	1.4974e+07	1.47059e+07
SM(t40:5)	SM	M+H	795.601	14.716	C45 H84 O7 N2 P1	3.99565e+07	4.61727e+07	3.3499e+07	4.68381e+07	3.3393e+07	3.94505e+07	4.9367e+07	4.96802e+07	4.24919e+07	4.56124e+07	3.81754e+07	3.68542e+07	3.70312e+07	3.83596e+07	3.60125e+07	3.37954e+07	3.25106e+07
SM(t40:7)	SM	M+H	791.57	8.8067	C45 H80 O7 N2 P1	1.30644e+08	1.67758e+08	1.30132e+08	1.17983e+08	5.20421e+07	1.12477e+08	1.24452e+08	1.14601e+08	1.83029e+08	9.92761e+07	1.06338e+08	1.14133e+08	1.20408e+08	1.13681e+08	1.10969e+08	1.15109e+08	1.38433e+08
SM(t41:0)	SM	M+H	819.695	16.7046	C46 H96 O7 N2 P1	2.5479e+07	2.87013e+07	2.28327e+07	2.20564e+07	2.50078e+07	5.39822e+07	4.10138e+07	3.41265e+07	4.86167e+07	3.86254e+07	3.25825e+07	3.37404e+07	3.15042e+07	3.26191e+07	3.4522e+07	3.68709e+07	3.28179e+07
SM(t18:0_23:5)	SM	M+H	809.617	17.153	C46 H86 O7 N2 P1	2.33402e+06	4.78004e+06	2.34306e+06	3.09339e+06	3.37533e+06	6.21543e+06	7.60977e+06	6.20018e+06	5.01113e+06	4.5386e+06	3.99728e+06	4.87421e+06	4.48012e+06	4.04347e+06	5.15859e+06	4.80086e+06	4.67423e+06
SM(t42:1)	SM	M+H	831.695	15.9982	C47 H96 O7 N2 P1	6.89972e+07	8.70559e+07	7.16112e+07	7.63054e+07	5.91276e+07	1.19972e+08	114672792	9.30527e+07	1.19502e+08	8.66316e+07	8.49488e+07	8.04095e+07	8.24028e+07	8.10073e+07	7.66742e+07	8.05646e+07	8.50242e+07
SM(t42:2)	SM	M+H	829.679	14.8849	C47 H94 O7 N2 P1	1.74538e+07	2.17784e+07	1.77912e+07	2.0428e+07	1.48375e+07	2.19748e+07	2.6566e+07	2.36807e+07	2.58991e+07	1.63643e+07	1.83359e+07	2.22871e+07	1.53384e+07	2.52361e+07	1.4707e+07	1.87182e+07	1.83419e+07
SM(t42:3)	SM	M+H	827.664	16.1132	C47 H92 O7 N2 P1	1.44165e+07	1.55606e+07	1.01494e+07	1.16701e+07	7.7419e+06	2.31874e+07	2.07748e+07	1.79447e+07	2.10032e+07	1.5335e+07	1.70854e+07	1.48386e+07	1.50117e+07	1.56087e+07	1.38055e+07	1.35841e+07	1.47297e+07
SM(t42:7)	SM	M+H	819.601	8.72149	C47 H84 O7 N2 P1	6.07611e+06	7.45047e+06	6.19718e+06	8.48486e+06	4.65885e+06	6.28281e+06	2.8597e+06	5.98495e+06	6.60548e+06	5.07414e+06	5.10479e+06	5.06413e+06	5.1103e+06	4.57965e+06	5.24212e+06	4.4801e+06	5.74815e+06
SPH(d17:1)	SPH	M+H	286.274	2.151	C17 H36 O2 N1	7.13724e+06	8.61706e+06	8.48811e+06	2.13747e+07	1.86043e+07	3.20123e+07	1.92709e+07	2.99059e+07	2.41149e+07	9.17234e+06	1.12472e+07	1.08186e+07	1.06297e+07	9.9389e+06	1.19031e+07	1.11719e+07	1.06677e+07
SPH(d18:0)	SPH	M+H	302.305	3.03185	C18 H40 O2 N1	1.43336e+07	1.92418e+07	1.64323e+07	2.23372e+07	1.70266e+07	3.12661e+07	4.95687e+07	2.96537e+07	2.53227e+07	1.48864e+07	2.10176e+07	2.07732e+07	2.14433e+07	2.07462e+07	2.12199e+07	1.99319e+07	2.01194e+07
SPH(d18:1)	SPH	M+H	300.29	2.68885	C18 H38 O2 N1	1.28188e+08	1.46179e+08	1.33342e+08	1.44957e+08	1.13088e+08	2.6032e+08	3.00414e+08	1.86453e+08	1.72534e+08	1.50982e+08	1.57924e+08	1.5976e+08	1.61161e+08	1.60668e+08	1.54803e+08	1.56463e+08	1.58771e+08
SPH(d18:2)	SPH	M+H	298.274	1.96766	C18 H36 O2 N1	1.32779e+07	1.70734e+07	1.42423e+07	1.61987e+07	1.15702e+07	2.4589e+07	2.59429e+07	1.45866e+07	1.56314e+07	1.47327e+07	1.89133e+07	1.84543e+07	1.91882e+07	1.88046e+07	1.88444e+07	1.8831e+07	1.95486e+07
SPH(d19:1)	SPH	M+H	314.305	2.77056	C19 H40 O2 N1	9.86401e+06	9.14719e+06	1.22678e+07	2.07823e+07	1.68345e+07	2.36816e+07	3.05775e+07	2.50836e+07	1.94886e+07	9.92119e+06	1.49045e+07	1.47732e+07	1.53909e+07	1.5041e+07	1.51142e+07	1.64366e+07	1.53854e+07
SPH(m18:0)	SPH	M+H	286.31	3.47612	C18 H40 O1 N1	7.65789e+06	8.14341e+06	8.71022e+06	7.36567e+06	5.509e+06	1.11404e+07	1.38971e+07	1.12778e+07	1.45993e+07	1.12125e+07	9.33296e+06	8.80761e+06	7.2007e+06	8.17977e+06	8.73299e+06	9.79247e+06	9.10704e+06
SPH(m18:1)	SPH	M+H	284.295	3.039	C18 H38 O1 N1	2.40403e+06	2.98637e+06	2.58104e+06	2.76534e+06	2.09361e+06	2.76931e+06	4.18777e+06	3.55539e+06	3.21414e+06	2.19806e+06	2.80338e+06	2.19721e+06	2.78929e+06	2.95863e+06	2.9477e+06	2.08563e+06	2.98616e+06
SPH(m19:0)	SPH	M+H	300.326	4.01498	C19 H42 O1 N1	688348	597997	400917	827119	409955	2.13544e+06	2.54329e+06	1.22212e+06	2.93147e+06	2.3868e+06	1.31432e+06	1.19446e+06	1.06802e+06	1.12846e+06	1.18017e+06	1.32622e+06	1.17011e+06
SPH(m20:0)	SPH	M+H	314.342	5.19072	C20 H44 O1 N1	2.65132e+06	1.99866e+06	1.6144e+06	1.23474e+06	2.167e+06	5.26518e+06	4.78072e+06	3.19679e+06	5.18824e+06	4.30602e+06	4.15857e+06	2.96198e+06	3.65263e+06	2.26642e+06	2.52515e+06	3.30746e+06	3.52455e+06
SPH(t17:0)	SPH	M+H	304.285	1.197	C17 H38 O3 N1	7.70621e+06	9.39625e+06	1.04244e+07	7.63166e+06	6.76737e+06	8.62382e+06	1.7919e+07	8.0615e+06	8.5883e+06	8.0682e+06	9.8604e+06	9.42284e+06	8.85038e+06	9.78707e+06	1.04549e+07	9.28989e+06	1.06777e+07
SPH(t18:0)	SPH	M+H	318.3	2.554	C18 H40 O3 N1	1.71669e+06	1.75349e+06	1.49628e+06	820298	470813	1.7913e+06	1.9909e+06	2.99831e+06	2.20212e+06	1.15365e+06	2.77176e+06	3.14571e+06	2.75813e+06	2.75894e+06	1.97811e+06	2.11835e+06	2.62768e+06
SPH(t20:0)	SPH	M+H	346.332	3.22642	C20 H44 O3 N1	69099.6	170539	248054	159534	273685	172591	301844	3.64236e+06	262991	2.81211e+06	0	103808	57217.6	30729	0	0	64647.4
ST(m43:4)	ST	M+Na	906.61	13.505	C49 H89 O10 N1 S1 Na1	4.36732e+07	4.38208e+07	3.32518e+07	3.44556e+07	4.0568e+07	3.92193e+07	3.46974e+07	4.62403e+07	3.34342e+07	4.69241e+07	6.51141e+07	6.29266e+07	6.29746e+07	6.24636e+07	6.48446e+07	6.29751e+07	6.60394e+07
SiE(25:0)	SiE	M+H	779.764	20.937	C54 H99 O2	4.51503e+08	5.22945e+08	2.77329e+08	2.43827e+08	2.76556e+08	6.48611e+08	6.69185e+08	4.08997e+08	3.14605e+08	4.39216e+08	4.20023e+08	4.11014e+08	4.16147e+08	4.0541e+08	4.22391e+08	4.14342e+08	4.03905e+08
StE(38:5)	StE	M+H	949.874	22.0909	C67 H113 O2	1.16804e+07	1.13692e+07	1.95025e+07	1.87931e+07	1.05583e+07	1.5337e+07	1.4164e+07	9.15291e+06	2.38325e+07	1.58379e+07	1.3642e+07	1.46018e+07	1.40047e+07	1.4307e+07	1.28867e+07	1.27765e+07	1.28937e+07
StE(4:0)	StE	M+H	483.42	10.205	C33 H55 O2	2.44884e+06	3.45478e+06	3.57512e+06	3.42762e+06	698197	2.38589e+06	3.11246e+06	2.36905e+06	3.28299e+06	2.22786e+06	2.41557e+06	2.28899e+06	2.15239e+06	2.37912e+06	2.29659e+06	2.5775e+06	2.58962e+06
TG(4:0_10:1_10:4)	TG	M+NH4	478.316	7.581	C27 H44 O6 N1	4.49261e+06	6.18094e+06	3.57093e+06	4.96453e+06	6.88263e+06	5.64172e+06	4.89965e+06	5.04193e+06	7.59084e+06	4.46887e+06	5.87415e+06	5.41257e+06	4.44012e+06	4.14063e+06	6.88956e+06	5.08999e+06	4.93648e+06
TG(4:0_10:2_10:3)	TG	M+Na	483.272	10.3154	C27 H40 O6 Na1	5.48864e+06	2.42668e+06	3.46287e+06	3.41637e+06	739577	8.04849e+06	6.90159e+06	3.34828e+06	9.22087e+06	4.83258e+06	5.25568e+06	3.50616e+06	1.28565e+06	5.76803e+06	1.21642e+08	5.63217e+06	5.69786e+06
TG(24:5)	TG	M+NH4	478.316	19.665	C27 H44 O6 N1	8.67177e+06	1.34332e+07	9.20376e+06	8.69763e+06	1.62461e+07	9.80066e+06	7.83062e+06	2.4717e+07	1.01728e+07	1.72709e+07	2.63619e+07	2.08677e+07	2.04535e+07	2.03828e+07	2.07351e+07	2.00959e+07	2.41587e+07
TG(6:0_6:0_13:0)	TG	M+NH4	502.41	7.613	C28 H56 O6 N1	0	343537	253746	89055.7	2.35845e+06	586275	244749	364013	376928	347972	273648	495352	373536	558927	505218	535896	484853
TG(26:6)	TG	M+Na	509.287	2.271	C29 H42 O6 Na1	2.32198e+06	1.25112e+06	1.30248e+06	4.45109e+06	6.16003e+06	1.33833e+07	5.45573e+06	4.53057e+06	3.65257e+06	5.80968e+06	5.62715e+06	5.69683e+06	4.93574e+06	4.2648e+06	5.57695e+06	5.03084e+06	4.61429e+06
TG(6:0_10:3_10:4)	TG	M+NH4	502.316	3.42683	C29 H44 O6 N1	1.82472e+07	1.02029e+07	3.06855e+06	1.2789e+07	5.10049e+06	1.20894e+06	1.02712e+07	6.80519e+06	1.11393e+07	2.39356e+06	5.84442e+06	7.46607e+06	6.49977e+06	6.00491e+06	6.12019e+06	6.09977e+06	7.44858e+06
TG(6:0_10:4_10:4)	TG	M+NH4	500.301	1.191	C29 H42 O6 N1	1.36906e+07	1.5453e+07	1.51102e+07	4.30409e+07	1.41782e+07	1.30732e+07	5.68129e+06	1.56028e+07	3.96689e+07	1.56454e+07	1.83936e+07	1.74381e+07	1.7624e+07	1.77107e+07	1.78669e+07	1.61844e+07	1.78568e+07
TG(27:1)	TG	M+NH4	528.426	7.775	C30 H58 O6 N1	10453.2	16801.3	78517	0	3.68191e+06	148763	114687	87533.2	450351	211771	240084	83761.3	402456	185079	234869	174984	358036
TG(8:0_10:3_10:4)	TG	M+NH4	530.348	3.456	C31 H48 O6 N1	5.27506e+06	3.18453e+06	1.68031e+06	2.15876e+06	1.98421e+06	631771	1.35565e+06	698395	1.78224e+06	551602	1.21306e+06	1.40643e+06	1.9201e+06	2.0138e+06	585970	657600	2.11246e+06
TG(9:0_10:1_10:1)	TG	M+NH4	554.442	8.30302	C32 H60 O6 N1	0	28368.8	0	0	5.58883e+06	0	0	0	0	0	313186	359187	315284	281629	388440	351326	384294
TG(9:0_10:2_10:2)	TG	M+Na	555.366	6.54177	C32 H52 O6 Na1	1.1674e+06	1.23609e+06	728880	698337	856188	2.07429e+06	1.731e+06	1.70428e+06	1.51735e+06	1.39367e+06	1.32337e+06	1.21311e+06	1.23389e+06	1.07413e+06	1.11506e+06	1.07098e+06	1.06382e+06
TG(8:0_8:0_14:2)	TG	M+NH4	568.457	9.12829	C33 H62 O6 N1	2.12834e+06	3.61673e+06	1.39493e+06	690412	587876	785124	804726	1.006e+06	1.45773e+06	1.21292e+06	1.47089e+06	1.40505e+06	1.27749e+06	1.62929e+06	1.22097e+06	1.42452e+06	1.41514e+06
TG(30:6)	TG	M+NH4	560.395	7.826	C33 H54 O6 N1	858503	1.13025e+06	488258	570301	263020	1.48726e+06	2.11659e+06	2.05713e+06	418422	1.24612e+06	1.01469e+06	1.0021e+06	912621	1.0369e+06	76908.6	955010	257322
TG(15:0_8:0_8:0)	TG	M+Na	591.46	7.58672	C34 H64 O6 Na1	1.05404e+07	1.69322e+07	8.23771e+06	7.67591e+06	3.68306e+06	5.88768e+06	7.04606e+06	6.5519e+06	8.37953e+06	6.43604e+06	7.84143e+06	7.26238e+06	7.1258e+06	7.70707e+06	6.77507e+06	7.47377e+06	7.33754e+06
TG(31:2)	TG	M+NH4	582.473	7.5494	C34 H64 O6 N1	1.95393e+06	2.36232e+06	1.3502e+06	822468	552588	918075	1.24685e+06	1.03013e+06	1.48967e+06	1.1857e+06	1.02153e+06	1.25672e+06	1.06351e+06	1.34707e+06	1.29299e+06	1.10072e+06	1.22468e+06
TG(11:0_10:0_10:2)	TG	M+Na	587.428	8.38043	C34 H60 O6 Na1	4.07152e+06	6.45708e+06	3.19084e+06	2.9861e+06	1.73954e+06	3.03632e+06	4.40712e+06	2.64353e+06	4.05113e+06	2.97125e+06	2.45269e+06	3.18956e+06	2.61328e+06	3.3286e+06	3.3794e+06	2.56091e+06	2.04823e+06
TG(10:0_10:0_11:2)	TG	M+Na	587.428	8.71954	C34 H60 O6 Na1	2.32935e+07	2.97052e+07	1.86315e+07	1.70749e+07	9.24174e+06	1.88772e+07	2.08384e+07	1.83076e+07	2.02346e+07	1.6652e+07	1.6699e+07	1.75723e+07	1.67755e+07	1.6374e+07	1.5909e+07	1.73738e+07	1.5965e+07
TG(31:2e)	TG	M+Na	573.449	7.58951	C34 H62 O5 Na1	2.66777e+06	4.45197e+06	2.21227e+06	2.45635e+06	1.14648e+06	1.4594e+06	1.96672e+06	1.69602e+06	2.3597e+06	1.71783e+06	2.2499e+06	1.9394e+06	1.91759e+06	2.09388e+06	2.12058e+06	2.04484e+06	2.14115e+06
TG(12:0e_8:0_11:2)	TG	M+Na	573.449	8.77623	C34 H62 O5 Na1	3.7585e+06	1.84096e+07	2.84903e+06	5.54416e+06	2.9295e+06	3.1215e+06	3.95349e+06	2.49345e+06	9.46426e+06	8.58341e+06	5.32916e+06	3.48279e+06	1.0721e+07	2.8076e+06	7.5177e+06	2.91562e+06	4.39933e+06
TG(14:0e_6:0_11:2)	TG	M+Na	573.449	10.643	C34 H62 O5 Na1	7.45172e+06	8.26528e+06	5.00604e+06	5.17357e+06	1.91481e+06	4.34737e+06	5.61621e+06	3.96503e+06	5.55277e+06	2.91878e+06	5.02426e+06	4.70361e+06	4.50954e+06	3.09453e+06	4.45909e+06	4.67697e+06	4.86625e+06
TG(31:5e)	TG	M+NH4	562.447	9.662	C34 H60 O5 N1	1.76239e+06	1.84628e+06	1.6839e+06	2.43556e+06	1.37241e+06	2.07339e+06	3.22406e+06	1.34284e+06	2.86186e+06	1.91184e+06	1.88642e+06	1.83241e+06	1.98985e+06	1.57326e+06	1.85384e+06	1.54203e+06	1.87728e+06
TG(16:0e_8:0_8:0)	TG	M+Na	591.496	13.9819	C35 H68 O5 Na1	457289	1.02759e+06	1.54255e+06	1.09602e+06	9.74305e+06	2.69122e+07	6.46559e+06	3.71947e+06	1.97747e+07	1.04171e+07	5.9459e+06	7.1284e+06	5.71183e+06	6.4137e+06	6.92358e+06	5.09281e+06	6.78154e+06
TG(4:0_14:0_14:1)	TG	M+Na	603.46	9.601	C35 H64 O6 Na1	43908.4	62490.3	273700	393893	2.91069e+06	2.36578e+06	2.41783e+06	237552	942660	666680	617955	764789	653902	947460	812874	701727	669520
TG(6:0_12:2_14:0)	TG	M+H	579.462	9.6895	C35 H63 O6	19982.6	134570	45878	29952.3	1.60546e+06	17379.2	96376	0	58270	29414.2	38357.7	38206.1	31433.8	69794	18218.8	48526	27689.8
TG(4:0_12:2_16:0)	TG	M+NH4	596.488	12.122	C35 H66 O6 N1	458118	0	0	0	0	0	746927	0	0	0	0	231130	310453	0	0	213004	217666
TG(10:0_11:2_11:3)	TG	M+H	573.415	10.0193	C35 H57 O6	480373	248019	251412	515699	989194	2.44311e+06	2.15013e+06	1.57456e+06	2.54025e+06	1.22393e+06	1.18081e+06	1.32726e+06	1.20979e+06	939476	1.04138e+06	1.00406e+06	1.20353e+06
TG(32:5e)	TG	M+NH4	576.462	10.608	C35 H62 O5 N1	4.13842e+06	2.01311e+06	919890	2.84431e+06	905714	2.71499e+06	4.00081e+06	1.33512e+06	3.28782e+06	2.37314e+06	4.86292e+06	2.2083e+06	2.12572e+06	1.45729e+06	2.24741e+06	1.60708e+06	1.41132e+06
TG(16:0e_6:0_11:1)	TG	M+Na	603.496	15.7607	C36 H68 O5 Na1	9.86388e+06	9.21186e+06	1.36226e+07	1.75026e+07	2.37085e+07	2.93918e+07	1.53551e+07	7.91977e+06	2.41645e+07	2.33058e+07	1.68399e+07	1.66018e+07	1.64699e+07	1.69909e+07	1.7048e+07	1.65481e+07	1.72511e+07
TG(6:0_9:0_18:2)	TG	M+NH4	610.504	8.78331	C36 H68 O6 N1	851714	2.70247e+06	1.73716e+06	576212	752451	0	0	220781	424357	333815	490614	797996	855656	587213	421189	751497	582604
TG(33:2)	TG	M+Na	615.46	8.78331	C36 H64 O6 Na1	4.37915e+06	9.46233e+06	5.38349e+06	2.79057e+06	2.29013e+06	1.94166e+06	1.65185e+06	1.94309e+06	3.83205e+06	3.11721e+06	3.4283e+06	3.33926e+06	3.91352e+06	3.2057e+06	2.82764e+06	3.473e+06	3.51978e+06
TG(33:3)	TG	M+Na	613.444	7.609	C36 H62 O6 Na1	8.84453e+06	1.20277e+07	7.04897e+06	6.22012e+06	3.52402e+06	4.97435e+06	5.77244e+06	5.51522e+06	7.39886e+06	6.16363e+06	6.43741e+06	5.70101e+06	6.30271e+06	6.28534e+06	6.15934e+06	6.08379e+06	6.07187e+06
TG(4:0_11:3_18:0)	TG	M+Na	613.444	8.77583	C36 H62 O6 Na1	6.53758e+06	8.45559e+06	7.29999e+06	7.90229e+06	3.07917e+06	5.0459e+06	7.63208e+06	7.47147e+06	9.98373e+06	8.08206e+06	6.2192e+06	7.66023e+06	6.53681e+06	1.21331e+07	5.76682e+06	6.31982e+06	6.76848e+06
TG(16:0_6:0_11:3)	TG	M+Na	613.444	9.53096	C36 H62 O6 Na1	2.49929e+06	3.90776e+06	736162	2.98611e+06	1.49101e+06	2.2858e+06	3.22827e+06	3.05034e+06	3.8116e+06	2.10795e+06	1.97151e+06	3.37494e+06	1.1793e+06	2.63804e+06	1.49417e+06	3.09659e+06	1.48754e+06
TG(4:0_11:2_18:1)	TG	M+Na	613.444	10.6681	C36 H62 O6 Na1	5.23385e+07	6.80468e+07	3.67547e+07	3.53884e+07	1.8889e+07	2.44585e+07	3.43227e+07	3.08375e+07	3.13646e+07	3.613e+07	3.74908e+07	3.52406e+07	3.58473e+07	3.20837e+07	3.31819e+07	3.83158e+07	3.40215e+07
TG(12:0e_10:1_11:2)	TG	M+NH4	594.509	13.2737	C36 H68 O5 N1	1.56464e+06	4.82493e+06	6.48825e+06	1.85064e+06	574991	2.07956e+06	4.41595e+06	0	1.44772e+07	629907	2.26024e+06	1.61079e+06	822969	2.15754e+06	2.25401e+06	1.89483e+06	1.72475e+06
TG(16:0_6:0_11:4)	TG	M+Na	611.428	9.91076	C36 H60 O6 Na1	1.13001e+07	3.64237e+06	1.02917e+07	2.03248e+06	1.70358e+06	1.45957e+06	926870	2.06652e+07	3.02883e+06	1.13751e+06	8.73064e+06	1.73782e+06	1.35481e+07	1.1093e+06	2.26138e+06	2.54232e+06	1.32288e+07
TG(4:0_11:2_18:2)	TG	M+Na	611.428	10.703	C36 H60 O6 Na1	8.26639e+06	8.26894e+06	5.93023e+06	5.32629e+06	3.50528e+06	3.89626e+06	5.81987e+06	5.59322e+06	5.82991e+06	6.32642e+06	6.12482e+06	5.23657e+06	5.25791e+06	5.04176e+06	4.91522e+06	5.67183e+06	5.78629e+06
TG(33:4e)	TG	M+Na	597.449	10.06	C36 H62 O5 Na1	3.07325e+06	5.45457e+06	2.92282e+06	3.77916e+06	1.41836e+06	4.73485e+06	2.98835e+06	5.52327e+06	5.36833e+06	1.98015e+06	4.08453e+06	3.16602e+06	2.56608e+06	3.04896e+06	2.53931e+06	2.9984e+06	1.84084e+06
TG(12:0e_10:2_11:2)	TG	M+NH4	592.494	10.535	C36 H66 O5 N1	7.53638e+06	9.80486e+06	5.88e+06	6.36179e+06	2.75064e+06	5.66329e+06	8.4603e+06	7.4583e+06	8.10946e+06	4.31689e+06	5.42718e+06	6.31035e+06	5.73751e+06	5.15633e+06	5.86309e+06	5.60904e+06	5.82909e+06
TG(16:2e_6:0_11:2)	TG	M+Na	597.449	11.0181	C36 H62 O5 Na1	1.74231e+07	3.55242e+07	2.30791e+07	1.16873e+07	7.19857e+06	8.23173e+06	8.75621e+06	1.09948e+07	1.3394e+07	1.29869e+07	1.39821e+07	1.3329e+07	1.32429e+07	1.33048e+07	1.302e+07	1.39431e+07	1.45158e+07
TG(16:0e_6:0_11:4)	TG	M+Na	597.449	12.071	C36 H62 O5 Na1	9.10078e+06	1.49836e+07	1.64715e+07	5.37054e+06	4.89152e+06	5.74651e+06	1.48561e+07	2.27183e+06	2.7631e+07	1.0119e+07	9.99898e+06	1.02157e+07	9.15841e+06	1.04533e+07	9.88406e+06	1.01732e+07	1.02602e+07
TG(10:0_11:2_12:3)	TG	M+H	587.431	8.72542	C36 H59 O6	2.3049e+07	2.98716e+07	1.8189e+07	1.70234e+07	9.22534e+06	1.88433e+07	2.0843e+07	1.82786e+07	1.93265e+07	1.64994e+07	1.64892e+07	1.75165e+07	1.67254e+07	1.62909e+07	1.60371e+07	1.69767e+07	1.60137e+07
TG(10:0_11:3_12:2)	TG	M+H	587.431	9.704	C36 H59 O6	170240	271659	349776	862883	573813	458034	903017	636090	1.3389e+06	878743	90453.4	183086	528192	129549	1.10704e+06	1.30697e+06	314465
TG(12:0_10:2_11:3)	TG	M+H	587.431	10.3891	C36 H59 O6	5.23586e+06	5.88334e+06	5.23914e+06	2.85838e+06	1.30467e+06	3.03129e+06	5.66081e+06	4.10762e+06	6.08577e+06	5.07746e+06	4.63723e+06	3.99435e+06	3.99244e+06	4.49843e+06	4.01133e+06	5.24226e+06	4.53154e+06
TG(14:1e_8:0_11:4)	TG	M+H	573.451	7.58229	C36 H61 O5	2.68355e+06	4.66102e+06	2.3872e+06	2.57871e+06	1.13392e+06	1.36767e+06	2.12634e+06	1.67487e+06	2.50092e+06	1.67074e+06	2.17821e+06	1.90202e+06	1.87551e+06	2.16139e+06	2.1263e+06	2.02206e+06	2.19465e+06
TG(12:0e_10:2_11:3)	TG	M+H	573.451	10.094	C36 H61 O5	5.6157e+06	7.83028e+06	7.32723e+06	6.58651e+06	2.49197e+06	6.39371e+06	9.68409e+06	1.01483e+07	1.22135e+07	4.76803e+06	9.49619e+06	4.54376e+06	4.57794e+06	8.57616e+06	4.14808e+06	7.55399e+06	4.09481e+06
TG(16:1e_6:0_11:4)	TG	M+H	573.451	10.6622	C36 H61 O5	7.42479e+06	1.08973e+07	5.04574e+06	5.0929e+06	1.87473e+06	4.37457e+06	6.06392e+06	3.95164e+06	5.36514e+06	2.67559e+06	4.91259e+06	5.92538e+06	4.50329e+06	3.21e+06	4.45231e+06	4.64288e+06	4.85978e+06
TG(12:0e_10:3_11:3)	TG	M+H	571.436	10.711	C36 H59 O5	3.98507e+06	3.90354e+06	2.76589e+06	1.60354e+06	1.22905e+06	1.91792e+06	4.24349e+06	1.49953e+06	2.73154e+06	2.47236e+06	2.35244e+06	2.19064e+06	2.16163e+06	2.35766e+06	1.86052e+06	1.9719e+06	3.9612e+06
TG(16:0_6:0_12:0)	TG	M+Na	633.506	17.01	C37 H70 O6 Na1	18521.5	947229	5.55592e+06	6.47097e+06	3.83754e+06	236173	285961	65493.1	134503	169673	1.62316e+06	1.17903e+06	1.28988e+06	1.79611e+06	1.45343e+06	1.18766e+06	1.84188e+06
TG(34:0)	TG	M+NH4	628.551	17.01	C37 H74 O6 N1	0	5.6536e+06	4.03228e+07	4.2231e+07	1.75992e+07	0	218451	1.08848e+06	6.3728e+06	54755.4	1.10809e+07	9.411e+06	1.01905e+07	8.26893e+06	9.59845e+06	9.31674e+06	9.54124e+06
TG(16:0_6:0_12:1)	TG	M+Na	631.491	11.0203	C37 H68 O6 Na1	7.78296e+06	9.09351e+06	1.30588e+07	1.07341e+07	4.36228e+07	1.71769e+07	7.82104e+06	7.73241e+06	1.87721e+07	1.17127e+07	1.28068e+07	1.31875e+07	1.24781e+07	1.27898e+07	1.27215e+07	1.26433e+07	1.46616e+07
TG(18:0_6:0_10:1)	TG	M+NH4	626.535	13.195	C37 H72 O6 N1	1.63452e+07	2.13162e+07	1.81283e+07	2.03323e+07	1.46975e+07	1.84353e+07	1.82415e+07	1.96679e+07	1.69663e+07	1.23092e+07	1.68828e+07	2.06659e+07	2.00556e+07	1.78377e+07	1.34975e+07	1.48138e+07	1.52737e+07
TG(34:1)	TG	M+NH4	626.535	15.613	C37 H72 O6 N1	0	1.05074e+06	1.58313e+07	3.159e+07	1.06524e+07	106369	54343.8	1.152	1.94346e+06	0	1.04811e+06	1.53669e+06	1.911e+06	590622	2.88833e+06	186002	516908
TG(34:1e)	TG	M+Na	617.512	11.077	C37 H70 O5 Na1	1.23993e+06	2.65506e+06	2.5722e+06	2.37912e+06	2.60484e+07	7.58599e+06	3.12052e+06	1.32156e+06	7.05745e+06	2.98118e+06	4.53077e+06	5.19554e+06	4.8223e+06	3.9173e+06	4.63551e+06	4.87295e+06	5.32987e+06
TG(16:0e_8:0_10:1)	TG	M+Na	617.512	14.258	C37 H70 O5 Na1	6.49483e+07	4.7321e+07	5.3146e+07	6.32196e+07	1.49194e+08	2.85585e+08	1.63945e+08	5.58733e+07	2.0372e+08	1.41258e+08	1.11406e+08	1.12261e+08	1.15417e+08	1.06906e+08	1.04764e+08	1.02171e+08	1.11922e+08
TG(12:1e_6:0_16:0)	TG	M+H	595.53	16.3892	C37 H71 O5	2.1413e+07	2.11005e+07	3.11984e+07	4.47373e+07	4.21972e+07	8.41918e+07	4.70585e+07	3.32475e+07	6.6942e+07	4.4421e+07	3.86096e+07	3.63916e+07	3.81939e+07	3.68288e+07	3.71998e+07	3.85024e+07	3.73717e+07
TG(12:0e_6:0_16:1)	TG	M+Na	617.512	19.32	C37 H70 O5 Na1	8.34739e+06	1.0414e+07	6.95827e+06	7.99438e+06	7.86025e+06	8.48911e+06	3.61146e+06	1.18333e+07	4.91014e+06	8.10708e+06	7.41451e+06	9.82676e+06	6.4375e+06	7.40732e+06	8.637e+06	7.86716e+06	9.30257e+06
TG(4:0_14:1_16:1)	TG	M+Na	629.475	9.732	C37 H66 O6 Na1	500918	1.67435e+06	1.77678e+06	972735	4.00344e+06	3.00505e+06	1.59511e+06	686584	1.75472e+06	1.2068e+06	1.62024e+06	1.34692e+06	1.13643e+06	1.03305e+06	1.20262e+06	1.0439e+06	978085
TG(16:1_6:0_12:1)	TG	M+Na	629.475	10.758	C37 H66 O6 Na1	113694	1.10316e+06	1.67268e+06	19986.5	2.26131e+06	465948	0	106397	808540	103621	391561	237050	547197	12700.4	261411	460630	505387
TG(16:0_6:0_12:2)	TG	M+Na	629.475	11.088	C37 H66 O6 Na1	259713	714642	2.42771e+06	1.00821e+06	1.85523e+07	1.83742e+06	1.979	395609	1.92371e+06	950157	1.5225e+06	2.09965e+06	2.25915e+06	1.93865e+06	1.77512e+06	2.23415e+06	1.78949e+06
TG(34:2)	TG	M+H	607.493	11.474	C37 H67 O6	257945	0	695705	0	1.57281e+07	410995	0	0	911104	505459	554144	2.38396e+06	1.16074e+06	279911	896630	1.38224e+06	1.10657e+06
TG(16:1e_6:0_12:1)	TG	M+Na	615.496	13.2104	C37 H68 O5 Na1	6.07446e+06	3.99387e+06	6.32635e+06	4.42468e+06	1.87663e+07	4.47776e+07	2.54317e+07	4.33362e+06	3.52644e+07	2.18028e+07	1.8597e+07	1.918e+07	1.67948e+07	1.60782e+07	1.77403e+07	1.59016e+07	1.86393e+07
TG(12:1e_6:0_16:1)	TG	M+NH4	610.541	15.3145	C37 H72 O5 N1	2.82273e+09	2.35485e+09	2.82997e+09	3.5375e+09	4.11442e+09	8.50958e+09	6.05743e+09	3.80241e+09	7.0068e+09	4.87647e+09	4.27512e+09	4.13616e+09	4.22128e+09	4.09657e+09	4.00829e+09	3.99211e+09	4.13629e+09
TG(16:1_8:0_10:2)	TG	M+H	605.478	10.3	C37 H65 O6	0	0	0	63668.7	3.37197e+06	138054	66037.7	0	564989	26050.5	51014.7	197631	44604.4	101877	66951.1	48184.2	152005
TG(18:2e_6:0_10:1)	TG	M+H	591.498	13.9595	C37 H67 O5	458103	1.03326e+06	1.54255e+06	1.08952e+06	9.74232e+06	2.69802e+07	6.46594e+06	3.71736e+06	2.0547e+07	1.04183e+07	5.94516e+06	7.12489e+06	6.21659e+06	6.4137e+06	6.92393e+06	5.09281e+06	6.78154e+06
TG(14:0_10:2_10:2)	TG	M+NH4	620.488	10.3638	C37 H66 O6 N1	8.17234e+06	8.14674e+06	6.13932e+06	8.52919e+06	3.97558e+06	8.98407e+06	1.12217e+07	8.86162e+06	9.17262e+06	7.38441e+06	7.62738e+06	7.55843e+06	7.51346e+06	7.25102e+06	7.21984e+06	7.30406e+06	7.21774e+06
TG(34:4)	TG	M+NH4	620.488	10.7973	C37 H66 O6 N1	3.424e+06	2.94409e+06	2.6072e+06	4.53407e+06	2.39405e+06	4.83598e+06	8.60494e+06	2.42969e+06	5.20276e+06	3.47559e+06	2.62891e+06	3.79803e+06	3.67621e+06	3.77642e+06	2.82722e+06	3.0418e+06	2.58006e+06
TG(18:3e_6:0_10:2)	TG	M+NH4	604.494	11.9648	C37 H66 O5 N1	1.82351e+06	828457	2.66806e+06	3.59754e+06	1.08478e+07	3.80292e+07	2.21555e+07	2.80376e+06	2.46278e+07	1.6627e+07	1.25765e+07	1.47688e+07	6.48872e+06	1.41798e+07	8.32026e+06	1.08705e+07	1.32687e+07
TG(18:2e_6:0_10:3)	TG	M+NH4	604.494	12.4289	C37 H66 O5 N1	7.59133e+06	5.25414e+06	5.79764e+06	4.23372e+06	2.87148e+07	1.06826e+08	6.3241e+07	1.24091e+07	1.13575e+08	3.02086e+07	2.76824e+07	2.88002e+07	2.78542e+07	2.71811e+07	2.90681e+07	2.94207e+07	3.13083e+07
TG(18:3e_6:0_10:3)	TG	M+NH4	602.478	11.396	C37 H64 O5 N1	1.89743e+06	826340	243685	286171	2.13134e+06	2.02209e+07	8.55803e+06	326522	1.63913e+07	2.53573e+06	2.23696e+06	2.38324e+06	3.99078e+06	2.12895e+06	2.94069e+06	2.96379e+06	3.54016e+06
TG(4:0_15:0_16:0)	TG	M+NH4	642.567	17.234	C38 H76 O6 N1	3.30423e+07	2.63842e+07	1.55583e+07	1.80015e+07	1.21673e+07	2.48588e+07	3.5639e+07	1.95095e+07	2.82967e+07	2.34265e+07	2.20923e+07	2.21955e+07	2.15867e+07	2.06972e+07	2.06006e+07	2.138e+07	2.17261e+07
TG(35:1e)	TG	M+Na	631.527	16.992	C38 H72 O5 Na1	9.88253e+06	7.63343e+06	5.0782e+06	1.01326e+07	1.35684e+07	2.20327e+07	1.2161e+07	9.36551e+06	1.79455e+07	1.60952e+07	1.31694e+07	1.17101e+07	1.13338e+07	1.06861e+07	1.12418e+07	1.09686e+07	1.19801e+07
TG(18:0e_6:0_11:2)	TG	M+Na	629.512	15.7853	C38 H70 O5 Na1	1.37617e+07	1.45862e+07	2.2193e+07	2.39089e+07	4.68802e+07	5.20488e+07	2.43538e+07	1.37055e+07	4.13156e+07	4.02395e+07	2.65317e+07	2.70727e+07	2.57775e+07	2.66337e+07	6.83687e+07	3.24285e+07	2.99626e+07
TG(16:0_8:0_11:3)	TG	M+NH4	636.52	7.56619	C38 H70 O6 N1	2.68717e+06	4.3658e+06	2.27281e+06	1.91035e+06	845829	1.0083e+06	1.73782e+06	1.31468e+06	1.63932e+06	1.56035e+06	1.57092e+06	1.77528e+06	1.41754e+06	1.80863e+06	1.51913e+06	1.44207e+06	1.78328e+06
TG(4:0_11:2_20:1)	TG	M+NH4	636.52	10.0913	C38 H70 O6 N1	1.27841e+07	1.53218e+07	1.30977e+07	8.66854e+06	5.62526e+06	1.16348e+07	1.62834e+07	1.0696e+07	1.53286e+07	1.32508e+07	8.93598e+06	1.06986e+07	9.20897e+06	9.61223e+06	8.66512e+06	8.44101e+06	1.21416e+07
TG(6:0_11:2_18:1)	TG	M+NH4	636.52	10.6712	C38 H70 O6 N1	1.81781e+07	2.32114e+07	1.10943e+07	1.08086e+07	5.13498e+06	9.14655e+06	1.14176e+07	9.95178e+06	1.08321e+07	1.18316e+07	1.09278e+07	1.25843e+07	1.00243e+07	1.20048e+07	1.11288e+07	1.07667e+07	1.39635e+07
TG(14:0e_10:1_11:2)	TG	M+NH4	622.541	16.36	C38 H72 O5 N1	4.69194e+06	3.69503e+06	8.92488e+06	2.6274e+07	1.88776e+07	2.98541e+07	1.31727e+07	9.67152e+06	2.49958e+07	1.63261e+07	1.27899e+07	1.37349e+07	1.469e+07	1.34829e+07	1.35019e+07	1.4105e+07	1.26624e+07
TG(14:0_10:2_11:2)	TG	M+NH4	634.504	9.97832	C38 H68 O6 N1	4.92438e+06	7.61306e+06	4.41235e+06	1.99459e+06	1.74308e+06	2.32777e+06	4.79871e+06	3.34653e+06	4.02142e+06	2.59368e+06	3.30962e+06	3.32454e+06	3.10694e+06	1.89109e+06	3.02424e+06	3.35959e+06	3.07908e+06
TG(4:0_11:2_20:2)	TG	M+NH4	634.504	10.7064	C38 H68 O6 N1	3.89427e+06	5.11923e+06	3.04289e+06	3.32341e+06	1.27627e+06	2.84231e+06	3.56181e+06	2.02561e+06	3.65205e+06	2.413e+06	3.46668e+06	3.02877e+06	2.81132e+06	2.76752e+06	2.48337e+06	2.60832e+06	2.83522e+06
TG(14:0e_10:2_11:2)	TG	M+NH4	620.525	10.5198	C38 H70 O5 N1	3.6219e+06	4.02726e+06	3.11435e+06	1.84499e+06	946237	2.09868e+06	2.54041e+06	2.29577e+06	1.97018e+06	1.15091e+06	2.22527e+06	2.58597e+06	2.0354e+06	2.06686e+06	2.45105e+06	3.27223e+06	2.78712e+06
TG(18:2e_6:0_11:2)	TG	M+NH4	620.525	11.0143	C38 H70 O5 N1	107802	4.26551e+06	2.52422e+06	1.26177e+06	2.01154e+06	804725	1.89642e+06	2.56506e+06	1.91701e+06	1.47764e+06	1.63123e+06	2.37973e+06	1.65202e+06	1.29374e+06	2.29496e+06	1.88159e+06	1.99718e+06
TG(18:3e_6:0_11:1)	TG	M+NH4	620.525	13.585	C38 H70 O5 N1	1.03102e+06	316139	621158	534440	4.92163e+06	1.19021e+07	4.07029e+06	487563	7.45977e+06	3.43007e+06	2.68807e+06	3.75403e+06	1.39505e+06	1.91995e+06	2.52186e+06	2.21895e+06	2.26965e+06
TG(14:0e_10:3_11:2)	TG	M+Na	623.465	11.016	C38 H64 O5 Na1	2.41203e+07	2.17375e+07	1.33553e+07	1.36607e+07	5.23821e+06	6.82077e+06	1.13436e+07	9.37009e+06	9.79635e+06	1.62696e+07	1.40804e+07	1.23116e+07	1.12115e+07	1.20387e+07	1.15061e+07	1.20456e+07	1.10542e+07
TG(35:5e)	TG	M+NH4	618.509	11.995	C38 H68 O5 N1	3.43923e+06	7.34631e+06	5.32597e+06	2.24985e+06	2.66838e+06	631264	3.35777e+06	872553	6.08261e+06	3.26646e+06	2.99086e+06	3.17193e+06	1.25851e+06	2.61866e+06	3.80109e+06	2.08845e+06	3.2511e+06
TG(12:0e_11:2_12:3)	TG	M+H	601.483	14.623	C38 H65 O5	5.15359e+06	4.73629e+06	7.39358e+06	4.45607e+06	7.90074e+06	2.12709e+06	2.13104e+06	3.44838e+06	3.28102e+06	4.74843e+06	3.52324e+06	5.04022e+06	3.82078e+06	3.76777e+06	3.63406e+06	4.02007e+06	4.42028e+06
TG(13:0_11:3_11:3)	TG	M+H	613.446	8.78488	C38 H61 O6	6.42733e+06	8.34326e+06	7.26946e+06	6.04053e+06	3.65685e+06	5.44521e+06	1.32387e+07	8.88629e+06	9.40142e+06	4.81138e+06	6.23582e+06	7.0302e+06	6.58072e+06	1.20411e+07	5.73267e+06	7.03769e+06	6.8814e+06
TG(4:0_11:2_20:4)	TG	M+H	613.446	10.101	C38 H61 O6	3.44164e+07	5.50771e+07	3.90494e+07	2.15943e+07	1.02428e+07	2.60732e+07	3.51185e+07	2.65832e+07	3.52629e+07	2.65365e+07	2.4884e+07	2.32409e+07	2.44293e+07	2.32917e+07	2.19944e+07	3.6648e+07	2.32914e+07
TG(12:1e_11:2_12:3)	TG	M+NH4	616.494	8.97	C38 H66 O5 N1	629235	970973	1.71142e+06	1.33983e+06	506401	232494	323248	2.31762e+06	629451	0	684190	658195	792861	759933	687169	807459	1.02487e+06
TG(14:1e_10:3_11:2)	TG	M+NH4	616.494	11.7095	C38 H66 O5 N1	1.32976e+06	3.79113e+06	1.57349e+06	953864	0	3.46554e+06	6.75555e+06	1.50145e+06	1.0626e+07	1.43235e+06	1.30558e+06	2.4739e+06	1.80428e+06	1.19206e+06	2.59713e+06	2.04263e+06	2.89351e+06
TG(35:7e)	TG	M+H	597.451	11.005	C38 H61 O5	1.74437e+07	3.56706e+07	2.30795e+07	1.16829e+07	7.19897e+06	8.23108e+06	8.75802e+06	1.09938e+07	1.33948e+07	1.29845e+07	1.39798e+07	1.33345e+07	1.32466e+07	1.33063e+07	1.30184e+07	1.39427e+07	1.36054e+07
TG(14:0e_10:3_11:4)	TG	M+H	597.451	12.068	C38 H61 O5	9.10078e+06	1.49836e+07	1.64715e+07	5.37054e+06	4.89152e+06	5.74651e+06	1.48561e+07	2.27183e+06	2.7631e+07	1.0119e+07	9.99898e+06	1.02157e+07	9.15841e+06	1.04533e+07	9.88406e+06	1.01732e+07	1.02602e+07
TG(35:8e)	TG	M+H	595.436	10.429	C38 H59 O5	9.09623e+06	5.01716e+06	3.57145e+06	2.76624e+06	1.6165e+06	2.09199e+06	2.93005e+06	3.3268e+06	2.60208e+06	2.86092e+06	5.05072e+06	2.43518e+06	3.1294e+06	1.8396e+06	2.63663e+06	2.461e+06	2.71313e+06
TG(4:0_16:0_16:0)	TG	M+NH4	656.582	17.8463	C39 H78 O6 N1	1.97154e+06	7.77477e+07	4.85969e+08	4.74986e+08	2.18227e+08	1.73007e+06	1.93295e+06	1.55206e+07	7.91029e+07	1.23338e+06	1.22365e+08	1.24707e+08	1.17733e+08	1.21219e+08	1.25011e+08	1.26299e+08	1.2245e+08
TG(14:0e_11:0_11:0)	TG	M+NH4	642.603	13.9088	C39 H80 O5 N1	5.51879e+06	6.92174e+06	7.37652e+06	7.65649e+06	8.17354e+06	6.14976e+06	3.02316e+06	4.62321e+06	6.47071e+06	6.84159e+06	7.12713e+06	8.87595e+06	6.97378e+06	5.89989e+06	7.26808e+06	8.88869e+06	6.77044e+06
TG(36:1)	TG	M+NH4	654.567	11.0209	C39 H76 O6 N1	621505	717486	1.97021e+06	1.47603e+06	8.48656e+06	3.16694e+06	1.26477e+06	811621	3.42616e+06	2.05705e+06	2.36514e+06	2.41892e+06	1.92527e+06	2.02497e+06	1.52273e+06	2.57023e+06	2.44577e+06
TG(4:0_14:0_18:1)	TG	M+Na	659.522	12.1013	C39 H72 O6 Na1	0	0	521594	233022	1.44806e+07	609360	0	0	589196	502114	997632	912639	803381	387338	830403	865715	330091
TG(4:0_16:0_16:1)	TG	M+NH4	654.567	16.8553	C39 H76 O6 N1	189574	3.0346e+07	1.89243e+08	1.7039e+08	7.29755e+07	54561.7	252538	7.28108e+06	3.20072e+07	340273	4.5276e+07	4.24629e+07	4.32163e+07	4.20085e+07	4.15045e+07	4.46244e+07	4.27419e+07
TG(36:1e)	TG	M+Na	645.543	16.299	C39 H74 O5 Na1	1.06786e+08	9.90158e+07	8.83132e+07	1.22307e+08	1.91809e+08	3.69387e+08	2.82923e+08	1.41042e+08	2.60714e+08	1.5598e+08	1.4057e+08	1.26634e+08	1.18149e+08	1.32022e+08	1.23074e+08	1.35823e+08	1.28874e+08
TG(4:0_14:1_18:1)	TG	M+Na	657.506	11.0829	C39 H70 O6 Na1	4.40686e+06	4.25368e+06	8.75066e+06	5.35089e+06	7.06878e+07	1.22628e+07	4.02164e+06	3.67468e+06	1.20545e+07	8.29825e+06	1.1977e+07	1.0812e+07	1.15284e+07	1.17194e+07	1.1474e+07	1.09634e+07	1.09881e+07
TG(18:0_6:0_12:2)	TG	M+H	635.525	12.484	C39 H71 O6	0	0	0	0	7.19712e+06	0	0	255765	0	0	239969	0	0	231680	0	0	0
TG(4:0_14:0_18:2)	TG	M+NH4	652.551	15.8134	C39 H74 O6 N1	130800	1.50313e+07	1.2669e+08	8.01224e+07	4.3553e+07	503450	777440	1.59221e+06	2.19851e+07	294895	2.54059e+07	2.29644e+07	2.23884e+07	2.34319e+07	2.29506e+07	2.08304e+07	2.53985e+07
TG(9:0_9:0_18:2)	TG	M+NH4	652.551	16.134	C39 H74 O6 N1	4.23639e+06	2.02323e+07	1.33981e+08	1.21219e+08	5.87266e+07	2.41942e+07	1.69701e+07	6.84165e+06	3.736e+07	1.15909e+07	3.83972e+07	3.62897e+07	3.2564e+07	2.96339e+07	3.48292e+07	3.03792e+07	3.49792e+07
TG(12:1e_6:0_18:1)	TG	M+NH4	638.572	16.4253	C39 H76 O5 N1	7.70693e+08	8.42335e+08	1.27132e+09	1.66403e+09	2.37504e+09	3.95229e+09	2.00035e+09	1.26094e+09	2.94453e+09	2.09473e+09	1.78245e+09	1.69826e+09	1.65906e+09	1.6388e+09	1.62687e+09	1.77141e+09	1.6738e+09
TG(4:0_14:1_18:2)	TG	M+Na	655.491	10.0101	C39 H68 O6 Na1	4.3626e+06	5.49927e+06	6.27494e+06	4.9693e+06	2.42178e+07	1.71002e+07	8.94622e+06	4.33817e+06	2.68694e+07	1.21391e+07	8.21753e+06	7.50879e+06	1.26253e+07	1.19705e+07	7.28218e+06	7.05707e+06	1.12753e+07
TG(6:0_12:2_18:1)	TG	M+H	633.509	11.1988	C39 H69 O6	244347	1.519	421968	209897	3.2473e+07	533975	275663	111640	987422	547354	704202	3.0857e+06	1.44453e+06	541964	519601	1.94633e+06	593329
TG(4:0_14:0_18:3)	TG	M+NH4	650.535	14.7835	C39 H72 O6 N1	0	0	1.01136e+07	6.32933e+06	2.10036e+06	0	0	0	0	0	0	341095	0	377001	0	322942	0
TG(36:3e)	TG	M+Na	641.512	15.3403	C39 H70 O5 Na1	4.86126e+08	3.96588e+08	4.99788e+08	4.86482e+08	1.04202e+09	1.24832e+09	7.72175e+08	4.60832e+08	9.09196e+08	8.73634e+08	7.39721e+08	7.35194e+08	7.46705e+08	7.26636e+08	7.06203e+08	7.24039e+08	7.17056e+08
TG(12:1e_6:0_18:2)	TG	M+NH4	636.556	15.3403	C39 H74 O5 N1	2.14283e+09	1.81959e+09	2.53908e+09	2.68078e+09	5.17198e+09	9.41205e+09	5.14161e+09	2.64246e+09	6.65705e+09	4.94834e+09	3.9044e+09	4.07407e+09	4.01323e+09	3.88576e+09	3.76273e+09	3.91053e+09	3.86815e+09
TG(16:0e_10:1_10:2)	TG	M+NH4	636.556	16.848	C39 H74 O5 N1	449984	366875	189580	8.75397e+06	312405	860740	1.78336e+06	2.4577e+06	2.20871e+06	1.45723e+06	1.89756e+06	2.06503e+06	1.31553e+06	1.34135e+06	2.31147e+06	635573	2.75999e+06
TG(6:0_12:2_18:2)	TG	M+H	631.493	10.1128	C39 H67 O6	380814	824557	988860	591459	6.73441e+06	2.58082e+06	846624	487900	2.72176e+06	1.01953e+06	1.59904e+06	1.59238e+06	1.48903e+06	1.33372e+06	1.64185e+06	1.75176e+06	1.84678e+06
TG(15:0_10:2_11:2)	TG	M+H	631.493	10.547	C39 H67 O6	536504	926685	478419	1.59394e+06	8.21679e+06	2.33577e+06	576356	499165	1.61694e+06	1.29784e+06	1.20907e+06	1.85209e+06	2.29479e+06	2.35508e+06	1.20181e+06	2.44003e+06	420525
TG(4:0_14:2_18:2)	TG	M+NH4	648.52	12.153	C39 H70 O6 N1	0	0	0	0	0	1.96701e+06	1.00175e+06	0	1.94684e+06	0	294558	0	0	530198	0	0	0
TG(12:1e_6:0_18:3)	TG	M+H	617.514	11.022	C39 H69 O5	1.23993e+06	2.65506e+06	2.52713e+06	2.37912e+06	2.79563e+07	7.58599e+06	3.12052e+06	1.32156e+06	7.15353e+06	2.98118e+06	4.53077e+06	5.19554e+06	5.03783e+06	3.80434e+06	4.60107e+06	4.79744e+06	5.26706e+06
TG(20:4e_8:0_8:0)	TG	M+H	617.514	14.2511	C39 H69 O5	6.49483e+07	4.7321e+07	5.3146e+07	6.32196e+07	1.49194e+08	2.85585e+08	1.63945e+08	5.58733e+07	2.0372e+08	1.41258e+08	1.11406e+08	1.12261e+08	1.15417e+08	1.06906e+08	1.04764e+08	1.02171e+08	1.11922e+08
TG(12:1e_6:0_18:4)	TG	M+NH4	632.525	13.2189	C39 H70 O5 N1	1.61378e+08	1.24049e+08	1.42697e+08	1.50801e+08	3.40039e+08	7.88688e+08	4.65314e+08	1.41809e+08	5.97256e+08	3.49605e+08	2.91752e+08	2.99125e+08	2.97726e+08	2.9629e+08	2.9562e+08	2.78087e+08	2.98853e+08
TG(20:4e_6:0_10:3)	TG	M+NH4	628.494	12.071	C39 H66 O5 N1	482419	280193	228150	0	2.47629e+06	1.78701e+07	1.04844e+07	1.07062e+06	1.30194e+07	5.6469e+06	2.88221e+06	3.68493e+06	3.156e+06	3.0375e+06	3.62665e+06	3.01294e+06	2.27413e+06
TG(16:1e_10:4_10:4)	TG	M+Na	629.418	10.662	C39 H58 O5 Na1	1.08925e+07	9.98901e+06	6.75219e+06	5.74737e+06	2.82184e+06	3.34968e+06	5.2026e+06	5.80763e+06	5.59964e+06	7.33497e+06	6.95463e+06	5.6967e+06	5.8839e+06	6.18276e+06	5.90796e+06	6.41314e+06	6.61744e+06
TG(15:0_6:0_16:0)	TG	M+Na	675.553	18.1872	C40 H76 O6 Na1	269944	258389	2.71797e+06	2.29942e+06	1.55973e+06	391003	20946.4	225198	93168.1	218426	379431	459534	432370	506188	196661	431739	285330
TG(4:0_16:0_17:1)	TG	M+NH4	668.582	17.2551	C40 H78 O6 N1	271552	2.35087e+06	2.34681e+07	9.94677e+06	7.54065e+06	5.65062e+06	3.06263e+06	1.28922e+06	2.34105e+06	3.3003e+06	2.80961e+06	3.90901e+06	4.17985e+06	6.72803e+06	4.1157e+06	3.85945e+06	3.80652e+06
TG(16:0_10:0_11:2)	TG	M+NH4	666.567	15.99	C40 H76 O6 N1	2.56772e+07	2.59052e+07	2.28538e+07	3.96465e+07	1.95003e+07	2.43245e+07	4.12706e+07	3.27888e+07	1.94184e+07	2.11236e+07	2.72768e+07	2.63655e+07	2.60587e+07	2.56721e+07	2.53881e+07	2.67609e+07	2.63201e+07
TG(12:1e_6:0_19:1)	TG	M+NH4	652.587	16.9845	C40 H78 O5 N1	7.64581e+06	8.47858e+06	1.10228e+07	1.36886e+07	1.85603e+07	3.98623e+07	2.17957e+07	1.26761e+07	3.04878e+07	2.17502e+07	1.57091e+07	1.55742e+07	1.53213e+07	1.47961e+07	1.33542e+07	1.38188e+07	1.41278e+07
TG(17:0_10:2_10:2)	TG	M+Na	667.491	8.73457	C40 H68 O6 Na1	9.95069e+06	8.47541e+06	6.67359e+06	7.98658e+06	3.63523e+06	4.67878e+06	8.83034e+06	7.73143e+06	1.26126e+07	4.9526e+06	1.31448e+07	5.93166e+06	1.27053e+07	5.35009e+06	9.25481e+06	4.3484e+06	1.11902e+07
TG(16:0_10:2_11:2)	TG	M+Na	667.491	9.422	C40 H68 O6 Na1	2.36256e+07	1.41891e+07	5.88062e+06	1.09007e+07	3.39425e+06	7.66808e+06	6.50202e+06	9.70246e+06	9.36209e+06	6.28816e+06	5.99136e+06	1.17411e+07	5.97356e+06	4.80608e+06	1.57303e+07	1.6843e+07	1.745e+07
TG(16:1e_10:2_11:2)	TG	M+Na	651.496	9.127	C40 H68 O5 Na1	18422	359272	457272	213858	549277	1.5856e+06	530748	574408	42862.1	77507	811485	364097	626741	95901.5	242029	749736	230135
TG(20:3e_6:0_11:2)	TG	M+H	629.514	15.9708	C40 H69 O5	3.90544e+07	3.10252e+07	3.39447e+07	4.41764e+07	4.79324e+07	7.05134e+07	5.28627e+07	3.587e+07	5.90859e+07	5.13215e+07	4.49592e+07	4.37261e+07	4.36243e+07	4.10113e+07	3.97034e+07	4.45304e+07	3.93853e+07
TG(6:0_11:2_20:4)	TG	M+Na	663.46	16.3686	C40 H64 O6 Na1	3.1286e+07	2.61811e+07	1.79588e+07	2.28109e+07	1.08822e+07	1.48068e+07	2.7669e+07	1.71661e+07	3.33681e+07	1.29326e+08	1.25083e+08	1.75162e+07	3.62342e+07	6.56001e+07	1.26411e+08	6.10265e+07	6.42523e+07
TG(37:6)	TG	M+H	641.478	18.717	C40 H65 O6	1.30006e+06	2.47324e+06	746752	2.57088e+06	1.33731e+06	2.41405e+06	4.41768e+06	3.27247e+06	1.74618e+06	2.03197e+06	1.06927e+06	2.57636e+06	1.6707e+06	763533	2.34408e+06	2.70837e+06	1.8401e+06
TG(16:2e_10:2_11:4)	TG	M+H	623.467	10.4268	C40 H63 O5	5.52707e+06	6.15705e+06	3.49161e+06	4.05581e+06	550980	2.82705e+06	4.31498e+06	2.68252e+06	3.42018e+06	4.58372e+06	2.693e+06	3.23989e+06	2.75747e+06	2.86797e+06	3.61167e+06	3.07441e+06	3.36768e+06
TG(16:2e_10:4_11:2)	TG	M+NH4	640.494	11.2375	C40 H66 O5 N1	7.51398e+06	1.31315e+07	8.67592e+06	5.90982e+06	3.02951e+06	1.27751e+07	1.51209e+07	4.85726e+06	2.7249e+07	5.13112e+06	7.84608e+06	8.64445e+06	8.95e+06	9.45032e+06	8.07644e+06	1.05581e+07	9.31184e+06
TG(16:0_6:0_16:0)	TG	M+NH4	684.614	18.5416	C41 H82 O6 N1	2.18746e+06	1.06868e+07	1.16381e+08	9.83723e+07	4.22096e+07	2.53127e+06	3.17342e+06	936928	1.69703e+07	367434	2.79643e+07	1.8139e+07	2.11924e+07	1.80716e+07	2.33944e+07	2.1765e+07	2.06332e+07
TG(4:0_16:0_18:1)	TG	M+NH4	682.598	17.8379	C41 H80 O6 N1	337504	1.71697e+08	1.06728e+09	9.1318e+08	4.50085e+08	1.7914e+06	2.68706e+06	3.65201e+07	1.83104e+08	1.37163e+06	2.51992e+08	2.567e+08	2.51259e+08	2.47909e+08	2.59036e+08	2.66159e+08	2.50366e+08
TG(38:10)	TG	M+NH4	664.457	5.772	C41 H62 O6 N1	2.27633e+06	2.67921e+06	2.05954e+06	2.60156e+06	1.52514e+06	2.79212e+06	3.04597e+06	2.67156e+06	3.56157e+06	2.68148e+06	2.47538e+06	2.59515e+06	2.67822e+06	2.44065e+06	1.94378e+06	2.19435e+06	2.44926e+06
TG(18:4_10:3_10:3)	TG	M+NH4	664.457	17.702	C41 H62 O6 N1	1.24057e+07	1.25284e+06	7.10782e+07	2.53276e+06	837225	1.26698e+06	2.74776e+06	1.94349e+06	1.3658e+06	1.30884e+07	2.16889e+06	1.90272e+06	7.21407e+07	3.56119e+06	1.48157e+07	3.20863e+06	1.67069e+07
TG(16:0_11:1_11:1)	TG	M+H	663.556	6.652	C41 H75 O6	798215	51080.3	229195	516887	367019	422499	668946	110934	733410	1.05216e+06	653717	1.10307e+06	709532	116042	278735	727039	374648
TG(16:1_6:0_16:1)	TG	M+NH4	680.582	15.827	C41 H78 O6 N1	0	2.12152e+06	2.59586e+07	1.67736e+07	1.03675e+07	0	891025	50753.1	3.75677e+06	598172	5.10235e+06	4.79032e+06	5.01007e+06	5.2398e+06	5.57562e+06	4.46689e+06	5.09165e+06
TG(6:0_14:0_18:2)	TG	M+NH4	680.582	17.0092	C41 H78 O6 N1	2.73644e+06	2.0129e+08	1.40865e+09	1.25256e+09	5.47434e+08	1.44592e+07	1.51338e+07	3.25124e+07	3.10436e+08	6.65379e+06	3.29291e+08	3.31345e+08	3.10711e+08	3.06757e+08	2.91641e+08	2.98193e+08	3.04413e+08
TG(12:1e_6:0_20:1)	TG	M+H	649.577	12.1303	C41 H77 O5	279520	3349.72	750257	292854	0	469000	107780	469463	0	227596	870333	1.08962e+06	571838	464042	439322	807733	625650
TG(4:0_16:1_18:2)	TG	M+NH4	678.567	15.8502	C41 H76 O6 N1	0	1.56228e+07	1.01444e+08	7.54005e+07	3.77242e+07	1.41367e+06	122126	1.2593e+06	2.02835e+07	105769	2.28253e+07	2.08533e+07	1.93315e+07	2.05129e+07	1.89143e+07	1.78104e+07	1.94973e+07
TG(4:0_16:0_18:3)	TG	M+NH4	678.567	16.1781	C41 H76 O6 N1	758944	1.16472e+07	1.02595e+08	9.01945e+07	3.32962e+07	3.19963e+06	2.70126e+06	1.23007e+06	1.24438e+07	2.37731e+06	2.26516e+07	2.35567e+07	2.25311e+07	1.86491e+07	2.12896e+07	2.26755e+07	2.22636e+07
TG(14:1e_6:0_18:2)	TG	M+H	647.561	11.4135	C41 H75 O5	6.44798e+07	2.80371e+07	5.2198e+07	5.36236e+07	5.86948e+07	2.66145e+07	4.18117e+07	5.01054e+07	3.96502e+07	6.23597e+07	5.69626e+07	5.80242e+07	6.2212e+07	5.52924e+07	5.62688e+07	6.0013e+07	4.03661e+07
TG(12:1e_6:0_20:2)	TG	M+NH4	664.587	16.542	C41 H78 O5 N1	1.54113e+08	1.57347e+08	1.91914e+08	2.48915e+08	3.54672e+08	6.17082e+08	3.52337e+08	2.26213e+08	5.96554e+08	3.892e+08	3.11144e+08	2.90283e+08	2.72278e+08	2.70419e+08	2.70176e+08	2.82252e+08	2.78014e+08
TG(12:0e_6:0_20:3)	TG	M+NH4	664.587	16.8498	C41 H78 O5 N1	1.47796e+08	1.38953e+08	1.18729e+08	2.02861e+08	1.47842e+08	3.76476e+08	2.40685e+08	2.42131e+08	2.46164e+08	1.91448e+08	1.96216e+08	1.87889e+08	1.87306e+08	1.74071e+08	1.79942e+08	1.87211e+08	1.84293e+08
TG(6:0_12:2_20:2)	TG	M+NH4	676.551	10.11	C41 H74 O6 N1	324625	454321	880882	355777	4.21658e+06	1.89421e+06	665176	454473	1.7035e+06	852817	1.13751e+06	1.14793e+06	1.021e+06	1.03343e+06	1.02762e+06	874964	1.08852e+06
TG(38:4)	TG	M+NH4	676.551	10.499	C41 H74 O6 N1	62226.7	73167.8	512287	258581	4.95537e+06	1.56606e+06	259562	119588	1.5589e+06	295661	966480	277295	197015	533753	665690	780690	719113
TG(4:0_16:1_18:3)	TG	M+NH4	676.551	14.9721	C41 H74 O6 N1	1.11551e+06	778218	2.38194e+07	1.99335e+07	1.27725e+07	1.61045e+06	3.28162e+06	1.98759e+06	3.41955e+06	1.48799e+06	3.49548e+06	3.13441e+06	3.30943e+06	3.2614e+06	2.74822e+06	3.56428e+06	2.55174e+06
TG(12:1e_6:0_20:3)	TG	M+H	645.545	15.6432	C41 H73 O5	1.27315e+07	1.53199e+07	1.27129e+07	1.47846e+07	1.78324e+07	3.33218e+07	2.52231e+07	1.48839e+07	2.8832e+07	2.84929e+07	1.89307e+07	1.78689e+07	1.83507e+07	1.91147e+07	1.58697e+07	1.64166e+07	1.77282e+07
TG(12:0e_6:0_20:4)	TG	M+H	645.545	17.5062	C41 H73 O5	1.07083e+08	1.08326e+08	1.49584e+08	1.91719e+08	3.16931e+08	2.76774e+08	1.7198e+08	1.53517e+08	1.86592e+08	1.67976e+08	1.69249e+08	1.93965e+08	1.60967e+08	1.83462e+08	1.52724e+08	1.58725e+08	1.5828e+08
TG(16:0_10:1_12:4)	TG	M+Na	679.491	10.746	C41 H68 O6 Na1	1.40379e+06	1.65217e+06	1.14975e+06	2.21473e+06	1.0913e+06	2.48654e+06	1.66938e+06	1.64329e+06	2.3804e+06	2.96647e+06	1.4449e+06	1.92014e+06	1.58309e+06	1.78622e+06	1.79618e+06	1.60527e+06	2.67143e+06
TG(12:1e_6:0_20:4)	TG	M+H	643.53	15.0049	C41 H71 O5	3.29864e+07	3.30115e+07	3.27626e+07	4.35962e+07	3.94342e+07	9.63691e+07	5.46774e+07	4.76157e+07	6.85864e+07	5.17639e+07	4.60767e+07	4.57e+07	4.50494e+07	4.50622e+07	4.30174e+07	4.42863e+07	4.43209e+07
TG(12:0e_6:0_20:5)	TG	M+H	643.53	16.428	C41 H71 O5	6.40307e+08	6.09816e+08	7.99034e+08	9.55314e+08	1.3009e+09	1.50183e+09	9.70347e+08	7.91817e+08	1.13549e+09	1.00109e+09	8.9301e+08	9.32214e+08	8.36022e+08	9.07155e+08	8.35399e+08	8.93786e+08	8.45099e+08
TG(6:0_14:4_18:2)	TG	M+H	655.493	9.989	C41 H67 O6	4.3626e+06	5.49927e+06	6.27494e+06	4.9693e+06	2.42178e+07	1.71002e+07	8.94622e+06	4.33817e+06	2.68694e+07	1.21391e+07	8.21753e+06	7.50879e+06	1.26253e+07	1.19705e+07	7.28218e+06	7.05707e+06	1.12753e+07
TG(20:4e_8:0_10:2)	TG	M+NH4	658.541	13.555	C41 H72 O5 N1	2.87196e+07	2.22639e+07	1.80079e+07	2.5579e+07	5.04086e+07	9.71206e+07	5.58077e+07	3.90032e+07	9.10797e+07	5.1179e+07	4.36346e+07	4.30065e+07	4.35001e+07	3.81612e+07	4.18085e+07	4.07494e+07	4.74744e+07
TG(12:1e_6:0_20:5)	TG	M+H	641.514	13.8474	C41 H69 O5	3.23378e+07	2.318e+07	1.89275e+07	2.56802e+07	3.63546e+07	9.19139e+07	5.24596e+07	3.09382e+07	6.80625e+07	4.86369e+07	3.72657e+07	3.5796e+07	3.26871e+07	3.97949e+07	3.6022e+07	3.87348e+07	3.77181e+07
TG(18:2e_10:3_10:3)	TG	M+NH4	654.509	12.056	C41 H68 O5 N1	1.85072e+06	1.92102e+06	1.26525e+06	1.36256e+06	6.79303e+06	3.80428e+07	1.5695e+07	1.35711e+06	2.76975e+07	6.5951e+06	6.56037e+06	6.6025e+06	5.94869e+06	5.88793e+06	6.30188e+06	5.7255e+06	6.38401e+06
TG(16:0_6:0_17:0)	TG	M+NH4	698.629	18.945	C42 H84 O6 N1	4.35705e+06	534556	7.07909e+06	6.26833e+06	2.58406e+06	2.88993e+06	4.03773e+06	1.71611e+06	4.75658e+06	1.71473e+06	3.90732e+06	1.23411e+06	1.43255e+06	1.0596e+06	3.56352e+06	3.85584e+06	3.50311e+06
TG(39:1)	TG	M+NH4	696.614	17.414	C42 H82 O6 N1	8.22846e+06	9.57867e+06	2.07287e+07	2.26276e+07	1.24395e+07	2.03189e+07	1.53712e+07	1.32222e+07	1.96253e+07	1.51e+07	1.44513e+07	1.68257e+07	1.35222e+07	1.26442e+07	1.22857e+07	1.26013e+07	1.25348e+07
TG(4:0_17:0_18:1)	TG	M+NH4	696.614	18.1824	C42 H82 O6 N1	9.80452e+06	2.23689e+07	9.22545e+07	7.81915e+07	4.90665e+07	6.46861e+07	3.84133e+07	2.60118e+07	3.41667e+07	3.97943e+07	3.92572e+07	4.02273e+07	3.55713e+07	3.46571e+07	3.50502e+07	3.61622e+07	3.62458e+07
TG(17:0_10:2_12:0)	TG	M+Na	699.553	17.1162	C42 H76 O6 Na1	0	0	134883	5.35907e+06	308596	246014	0	135386	0	118270	0	0	0	240759	245932	83647.8	184448
TG(15:0_6:0_18:2)	TG	M+Na	699.553	17.4035	C42 H76 O6 Na1	6.90155e+06	1.08507e+07	4.15198e+07	3.56793e+07	3.04403e+07	3.34146e+07	2.14448e+07	1.40671e+07	1.08716e+07	2.85167e+07	2.28929e+07	2.32851e+07	2.23359e+07	2.19511e+07	2.09825e+07	2.18667e+07	2.13222e+07
TG(39:2)	TG	M+NH4	694.598	17.9318	C42 H80 O6 N1	5.11919e+06	5.79246e+06	4.6285e+06	1.1448e+07	3.65587e+06	1.44685e+07	1.07612e+07	1.35002e+07	3.43376e+06	1.49826e+07	9.17169e+06	8.19185e+06	8.37166e+06	8.24982e+06	7.67749e+06	8.53877e+06	7.46356e+06
TG(4:0_17:1_18:2)	TG	M+NH4	692.582	16.3486	C42 H78 O6 N1	2.07942e+06	6.54428e+06	1.86549e+07	2.55366e+07	1.66149e+07	2.9474e+07	1.17705e+07	7.01458e+06	6.15751e+06	1.55462e+07	1.34246e+07	1.23611e+07	1.01312e+07	1.15044e+07	9.39132e+06	1.30333e+07	1.15591e+07
TG(18:2_10:3_11:2)	TG	M+H	667.493	8.70932	C42 H67 O6	8.30259e+06	1.18462e+07	1.17818e+07	7.98658e+06	2.32641e+06	4.40144e+06	8.83034e+06	6.36054e+06	1.26126e+07	6.24498e+06	1.31448e+07	9.87485e+06	1.27053e+07	5.35009e+06	9.25481e+06	1.21384e+07	1.11902e+07
TG(16:0e_11:3_12:4)	TG	M+NH4	670.541	13.3722	C42 H72 O5 N1	0	0	0	2.21708e+06	4.76182e+06	1.80526e+07	7.07023e+06	0	1.38604e+07	7.95855e+06	3.08408e+06	2.17495e+06	2.53805e+06	6.49696e+06	5.65354e+06	3.26265e+06	5.29963e+06
TG(18:1e_10:4_11:3)	TG	M+Na	673.48	16.011	C42 H66 O5 Na1	0	309022	9.16568e+06	7.35195e+06	4.78729e+06	0	169380	0	1.15385e+06	158960	2.51189e+06	1.90025e+06	1.93037e+06	2.34657e+06	1.65358e+06	1.92098e+06	2.20925e+06
TG(19:1_10:4_10:4)	TG	M+NH4	680.488	15.051	C42 H66 O6 N1	1.3547e+07	5.39581e+07	6.94529e+06	2.76607e+06	1.01693e+07	5.07059e+07	5.33441e+07	1.14571e+07	2.37497e+07	5.37853e+07	1.59453e+07	5.67263e+07	3.99195e+06	1.20374e+07	5.81211e+06	1.89605e+07	7.84249e+06
TG(16:1_11:4_12:4)	TG	M+H	663.462	16.353	C42 H63 O6	3.1286e+07	1.29347e+07	2.88506e+07	2.28109e+07	1.08822e+07	1.48068e+07	2.7669e+07	2.92346e+07	3.33681e+07	1.29326e+08	1.25083e+08	1.95319e+07	3.62342e+07	6.56001e+07	1.26411e+08	6.10265e+07	6.42523e+07
TG(16:0_8:0_16:0)	TG	M+NH4	712.645	19.1367	C43 H86 O6 N1	1.53163e+06	1.5431e+07	9.7112e+07	8.26537e+07	3.35451e+07	5.94146e+06	8.75148e+06	5.31024e+06	2.24102e+07	3.94236e+06	2.04589e+07	2.31152e+07	2.3296e+07	2.39081e+07	2.2179e+07	2.1711e+07	2.30704e+07
TG(16:0_6:0_18:1)	TG	M+NH4	710.629	18.5315	C43 H84 O6 N1	2.22127e+06	5.33105e+07	2.97459e+08	2.27972e+08	1.11167e+08	1.64248e+07	1.79649e+07	1.54629e+07	7.91055e+07	7.00907e+06	7.69936e+07	7.2734e+07	7.32318e+07	6.70855e+07	7.17414e+07	6.91455e+07	7.39075e+07
TG(20:5_10:4_10:4)	TG	M+NH4	686.442	7.58121	C43 H60 O6 N1	4.32704e+06	6.92478e+06	4173141	4.52464e+06	1.4404e+06	2.79099e+06	2.72886e+06	1.8942e+06	5.91851e+06	4.5063e+06	3.85512e+06	3.65485e+06	3.22615e+06	3.72977e+06	3.22512e+06	3.26446e+06	3.47789e+06
TG(4:0_18:1_18:1)	TG	M+NH4	708.614	17.0233	C43 H82 O6 N1	392385	4.81413e+07	2.84099e+08	2.40553e+08	1.36266e+08	2.50718e+06	2.75394e+06	7.54983e+06	5.86092e+07	1.60081e+06	7.95795e+07	8.34017e+07	8.54465e+07	7.8662e+07	8.40226e+07	8.32516e+07	8.76876e+07
TG(4:0_18:0_18:2)	TG	M+NH4	708.614	17.8371	C43 H82 O6 N1	2.47875e+06	1.40997e+08	8.68092e+08	6.84957e+08	3.67329e+08	1.8633e+07	3.63456e+07	2.96083e+07	2.04902e+08	1.05047e+07	1.85766e+08	2.18756e+08	2.09881e+08	2.08826e+08	2.02085e+08	2.34854e+08	2.1858e+08
[truncated: 2,217 more rows]
